# Supplementary material
Source: publisher figshare collection journal article supplement (https://acs.figshare.com/ndownloader/files/4071049)
Supplement: Supplementary file 1 [file 4071049]

data_sa3720
_audit_creation_date              2014-11-19
_audit_creation_method
;
Olex2 1.2
(compiled 2013.12.10 svn.r2850 for OlexSys, GUI svn.r4736)
;
_shelxl_version_number            2013-4
_publ_contact_author_address      ?
_publ_contact_author_email        ?
_publ_contact_author_name         ''
_publ_contact_author_phone        ?
_publ_section_references
;
Dolomanov, O.V., Bourhis, L.J., Gildea, R.J, Howard, J.A.K. & Puschmann, H.
 (2009), J. Appl. Cryst. 42, 339-341.

Sheldrick, G.M. (2008). Acta Cryst. A64, 112-122
;
_chemical_name_common             ?
_chemical_name_systematic
;
 ?
;
_chemical_formula_moiety          'C17 H16 Br N O4 S'
_chemical_formula_sum             'C17 H16 Br N O4 S'
_chemical_formula_weight          410.28
_chemical_absolute_configuration  ad
_chemical_melting_point           ?
loop_
  _atom_type_symbol
  _atom_type_description
  _atom_type_scat_dispersion_real
  _atom_type_scat_dispersion_imag
  _atom_type_scat_source
 'C' 'C' 0.0033 0.0016 'International Tables Vol C Tables 4.2.6.8 and 6.1.1.4'
 'H' 'H' 0.0000 0.0000 'International Tables Vol C Tables 4.2.6.8 and 6.1.1.4'
 'Br' 'Br' -0.2901 2.4595
 'International Tables Vol C Tables 4.2.6.8 and 6.1.1.4'
 'N' 'N' 0.0061 0.0033 'International Tables Vol C Tables 4.2.6.8 and 6.1.1.4'
 'O' 'O' 0.0106 0.0060 'International Tables Vol C Tables 4.2.6.8 and 6.1.1.4'
 'S' 'S' 0.1246 0.1234 'International Tables Vol C Tables 4.2.6.8 and 6.1.1.4'

_shelx_space_group_comment
;
The symmetry employed for this shelxl refinement is uniquely defined
by the following loop, which should always be used as a source of
symmetry information in preference to the above space-group names.
They are only intended as comments.
;
_space_group_crystal_system       'monoclinic'
_space_group_IT_number            4
_space_group_name_H-M_alt         'P 1 21 1'
_space_group_name_Hall            'P 2yb'
loop_
  _space_group_symop_operation_xyz
 'x, y, z'
 '-x, y+1/2, -z'

_cell_length_a                    7.819(2)
_cell_length_b                    11.246(3)
_cell_length_c                    9.640(2)
_cell_angle_alpha                 90
_cell_angle_beta                  94.539(4)
_cell_angle_gamma                 90
_cell_volume                      845.0(4)
_cell_formula_units_Z             2
_cell_measurement_reflns_used     2776
_cell_measurement_temperature     173.1500
_cell_measurement_theta_max       27.4792
_cell_measurement_theta_min       2.1193
_shelx_estimated_absorpt_T_max    ?
_shelx_estimated_absorpt_T_min    ?
_exptl_absorpt_coefficient_mu     2.577
_exptl_absorpt_correction_T_max   1.0000
_exptl_absorpt_correction_T_min   0.6675
_exptl_absorpt_correction_type    multi-scan
_exptl_absorpt_process_details    'CrystalClear (Rigaku Inc., 2007)'
_exptl_crystal_colour             Colorless
_exptl_crystal_density_diffrn     1.613
_exptl_crystal_density_meas       ?
_exptl_crystal_density_method     ?
_exptl_crystal_description        Plate
_exptl_crystal_F_000              416
_exptl_crystal_size_max           0.22
_exptl_crystal_size_mid           0.2
_exptl_crystal_size_min           0.09
_exptl_special_details
;
 ?
;
_exptl_transmission_factor_max    ?
_exptl_transmission_factor_min    ?
_diffrn_reflns_av_R_equivalents   0.0355
_diffrn_reflns_av_unetI/netI      0.0396
_diffrn_reflns_Laue_measured_fraction_full 0.990
_diffrn_reflns_Laue_measured_fraction_max 0.991
_diffrn_reflns_limit_h_max        10
_diffrn_reflns_limit_h_min        -10
_diffrn_reflns_limit_k_max        14
_diffrn_reflns_limit_k_min        -13
_diffrn_reflns_limit_l_max        12
_diffrn_reflns_limit_l_min        -12
_diffrn_reflns_number             9215
_diffrn_reflns_point_group_measured_fraction_full 0.953
_diffrn_reflns_point_group_measured_fraction_max 0.944
_diffrn_reflns_theta_full         26.000
_diffrn_reflns_theta_max          27.479
_diffrn_reflns_theta_min          3.180
_diffrn_ambient_temperature       173.1500
_diffrn_detector_area_resol_mean  28.5714
_diffrn_measured_fraction_theta_full 0.990
_diffrn_measured_fraction_theta_max 0.991
_diffrn_measurement_device
;
Saturn724+ (2x2 bin mode)
;
_diffrn_measurement_device_details
;
AFC10: Fixed Chi 2 circle
;
_diffrn_measurement_device_type    'Saturn724+ CCD' 
_diffrn_measurement_method        '\w scans at fixed \c = 45\%'    
_diffrn_number_total              2040
_diffrn_orient_matrix_type        d*Trek
_diffrn_orient_matrix_UB_11       0.0254
_diffrn_orient_matrix_UB_12       0.0159
_diffrn_orient_matrix_UB_13       -0.1247
_diffrn_orient_matrix_UB_21       0.0177
_diffrn_orient_matrix_UB_22       0.0859
_diffrn_orient_matrix_UB_23       0.0146
_diffrn_orient_matrix_UB_31       0.1012
_diffrn_orient_matrix_UB_32       -0.0225
_diffrn_orient_matrix_UB_33       0.0093
_diffrn_radiation_detector        CCD
_diffrn_radiation_monochromator   'Graphite Monochromator'
_diffrn_radiation_type            MoK\a
_diffrn_radiation_wavelength      0.71073
_diffrn_source                    'Sealed Tube'
_diffrn_source_current            30.0000
_diffrn_source_power              1.5000
_diffrn_source_voltage            50.0000
_diffrn_special_details
;
 ?
;
_reflns_Friedel_coverage          0.813
_reflns_Friedel_fraction_full     0.912
_reflns_Friedel_fraction_max      0.893
_reflns_number_gt                 3551
_reflns_number_total              3669
_reflns_special_details
;
 Reflections were merged by SHELXL according to the crystal
 class for the calculation of statistics and refinement.
 
 _reflns_Friedel_fraction is defined as the number of unique
 Friedel pairs measured divided by the number that would be
 possible theoretically, ignoring centric projections and
 systematic absences.
;
_reflns_threshold_expression      'I > 2\s(I)'
_computing_cell_refinement        'CrystalClear (Rigaku Inc., 2007)'
_computing_data_collection        'CrystalClear (Rigaku Inc., 2007)'
_computing_data_reduction         'CrystalClear (Rigaku Inc., 2007)'
_computing_molecular_graphics     'Olex2 (Dolomanov et al., 2009)'
_computing_publication_material   'Olex2 (Dolomanov et al., 2009)'
_computing_structure_refinement    'SHELXL (Sheldrick, 2013)'
_computing_structure_solution
;
'SHELXS (Sheldrick, 2013)'
;
_refine_diff_density_max          0.267
_refine_diff_density_min          -0.235
_refine_diff_density_rms          0.052
_refine_ls_abs_structure_details
;
 Flack x determined using 1481 quotients [(I+)-(I-)]/[(I+)+(I-)]
 (Parsons and Flack (2004), Acta Cryst. A60, s61).
;
_refine_ls_abs_structure_Flack    0.018(5)
_refine_ls_extinction_coef        .
_refine_ls_extinction_method      none
_refine_ls_goodness_of_fit_ref    1.107
_refine_ls_hydrogen_treatment     constr
_refine_ls_matrix_type            full
_refine_ls_number_parameters      218
_refine_ls_number_reflns          3669
_refine_ls_number_restraints      1
_refine_ls_R_factor_all           0.0316
_refine_ls_R_factor_gt            0.0301
_refine_ls_restrained_S_all       1.107
_refine_ls_shift/su_max           0.000
_refine_ls_shift/su_mean          0.000
_refine_ls_structure_factor_coef  Fsqd
_refine_ls_weighting_details
'w=1/[\s^2^(Fo^2^)+(0.0227P)^2^+0.1319P] where P=(Fo^2^+2Fc^2^)/3'
_refine_ls_weighting_scheme       calc
_refine_ls_wR_factor_gt           0.0620
_refine_ls_wR_factor_ref          0.0629
_refine_special_details
;
 ?
;
_olex2_refinement_description
;
1. Fixed Uiso
 At 1.2 times of:
  All C(H) groups, All C(H,H) groups
 At 1.5 times of:
  All C(H,H,H) groups
2.a Ternary CH refined with riding coordinates:
 C1(H1), C2(H2)
2.b Secondary CH2 refined with riding coordinates:
 C3(H3A,H3B)
2.c Aromatic/amide H refined with riding coordinates:
 C6(H6), C7(H7), C8(H8), C9(H9), C10(H10), C12(H12), C13(H13), C15(H15),
 C16(H16)
2.d Idealised Me refined as rotating group:
 C17(H17A,H17B,H17C)
;
_atom_sites_solution_hydrogens    geom
_atom_sites_solution_primary      ?
_atom_sites_solution_secondary    ?
loop_
  _atom_site_label
  _atom_site_type_symbol
  _atom_site_fract_x
  _atom_site_fract_y
  _atom_site_fract_z
  _atom_site_U_iso_or_equiv
  _atom_site_adp_type
  _atom_site_occupancy
  _atom_site_site_symmetry_order
  _atom_site_calc_flag
  _atom_site_refinement_flags_posn
  _atom_site_refinement_flags_adp
  _atom_site_refinement_flags_occupancy
  _atom_site_disorder_assembly
  _atom_site_disorder_group
 Br1 Br 0.64740(5) 0.12020(4) 0.64957(4) 0.03605(12) Uani 1 1 d . . . . .
 S1 S 0.94686(12) 0.43451(8) 0.53460(10) 0.0246(2) Uani 1 1 d . . . . .
 O1 O 0.4673(3) 0.3696(3) 0.5792(3) 0.0325(6) Uani 1 1 d . . . . .
 O2 O 0.6530(3) 0.4970(3) 0.6742(3) 0.0324(6) Uani 1 1 d . . . . .
 O3 O 0.9321(4) 0.5601(2) 0.5184(3) 0.0367(7) Uani 1 1 d . . . . .
 O4 O 1.0444(3) 0.3677(3) 0.4432(3) 0.0317(6) Uani 1 1 d . . . . .
 N1 N 0.7479(3) 0.3748(3) 0.5096(3) 0.0210(6) Uani 1 1 d . . . . .
 C1 C 0.7257(4) 0.2680(3) 0.4200(4) 0.0210(7) Uani 1 1 d . . . . .
 H1 H 0.8308 0.2203 0.4320 0.025 Uiso 1 1 calc R . . . .
 C2 C 0.5786(5) 0.1954(3) 0.4702(4) 0.0281(8) Uani 1 1 d . . . . .
 H2 H 0.5480 0.1331 0.4017 0.034 Uiso 1 1 calc R . . . .
 C3 C 0.4264(5) 0.2733(4) 0.4826(4) 0.0338(9) Uani 1 1 d . . . . .
 H3A H 0.3892 0.3058 0.3920 0.041 Uiso 1 1 calc R . . . .
 H3B H 0.3330 0.2266 0.5147 0.041 Uiso 1 1 calc R . . . .
 C4 C 0.6238(5) 0.4181(3) 0.5921(4) 0.0244(7) Uani 1 1 d . . . . .
 C5 C 0.6902(4) 0.2967(3) 0.2662(4) 0.0233(7) Uani 1 1 d . . . . .
 C6 C 0.6760(5) 0.4118(3) 0.2160(4) 0.0290(8) Uani 1 1 d . . . . .
 H6 H 0.6889 0.4757 0.2772 0.035 Uiso 1 1 calc R . . . .
 C7 C 0.6423(5) 0.4322(4) 0.0736(4) 0.0379(10) Uani 1 1 d . . . . .
 H7 H 0.6326 0.5098 0.0405 0.045 Uiso 1 1 calc R . . . .
 C8 C 0.6235(6) 0.3391(4) -0.0177(4) 0.0434(11) Uani 1 1 d . . . . .
 H8 H 0.5993 0.3533 -0.1122 0.052 Uiso 1 1 calc R . . . .
 C9 C 0.6407(6) 0.2237(4) 0.0312(5) 0.0432(11) Uani 1 1 d . . . . .
 H9 H 0.6304 0.1602 -0.0307 0.052 Uiso 1 1 calc R . . . .
 C10 C 0.6731(5) 0.2027(4) 0.1727(4) 0.0335(9) Uani 1 1 d . . . . .
 H10 H 0.6835 0.1250 0.2053 0.040 Uiso 1 1 calc R . . . .
 C11 C 1.0157(4) 0.3992(3) 0.7076(4) 0.0245(8) Uani 1 1 d . . . . .
 C12 C 1.0709(4) 0.2843(3) 0.7374(4) 0.0287(8) Uani 1 1 d . . . . .
 H12 H 1.0709 0.2272 0.6676 0.034 Uiso 1 1 calc R . . . .
 C13 C 1.1261(5) 0.2563(4) 0.8733(4) 0.0350(9) Uani 1 1 d . . . . .
 H13 H 1.1638 0.1795 0.8943 0.042 Uiso 1 1 calc R . . . .
 C14 C 1.1268(5) 0.3398(4) 0.9792(4) 0.0342(9) Uani 1 1 d . . . . .
 C15 C 1.0705(5) 0.4537(4) 0.9457(4) 0.0385(10) Uani 1 1 d . . . . .
 H15 H 1.0706 0.5109 1.0154 0.046 Uiso 1 1 calc R . . . .
 C16 C 1.0136(5) 0.4846(4) 0.8101(4) 0.0341(9) Uani 1 1 d . . . . .
 H16 H 0.9749 0.5612 0.7891 0.041 Uiso 1 1 calc R . . . .
 C17 C 1.1866(6) 0.3101(5) 1.1263(4) 0.0489(11) Uani 1 1 d . . . . .
 H17A H 1.0953 0.3240 1.1852 0.073 Uiso 1 1 calc GR . . . .
 H17B H 1.2831 0.3592 1.1560 0.073 Uiso 1 1 calc GR . . . .
 H17C H 1.2199 0.2280 1.1320 0.073 Uiso 1 1 calc GR . . . .

loop_
  _atom_site_aniso_label
  _atom_site_aniso_U_11
  _atom_site_aniso_U_22
  _atom_site_aniso_U_33
  _atom_site_aniso_U_23
  _atom_site_aniso_U_13
  _atom_site_aniso_U_12
 Br1 0.0485(2) 0.03129(19) 0.0286(2) 0.0081(2) 0.00457(15) -0.00445(19)
 S1 0.0249(4) 0.0244(5) 0.0243(5) 0.0013(4) 0.0000(4) -0.0051(3)
 O1 0.0217(13) 0.0449(16) 0.0313(15) 0.0007(13) 0.0042(11) 0.0045(12)
 O2 0.0407(15) 0.0304(15) 0.0258(14) -0.0032(12) 0.0000(12) 0.0115(12)
 O3 0.0429(17) 0.0265(15) 0.0398(17) 0.0071(13) -0.0035(13) -0.0076(12)
 O4 0.0221(13) 0.0444(17) 0.0293(15) -0.0014(13) 0.0058(11) -0.0064(12)
 N1 0.0201(13) 0.0217(14) 0.0209(15) -0.0020(12) 0.0005(11) -0.0006(11)
 C1 0.0212(16) 0.0196(16) 0.0223(18) -0.0003(14) 0.0021(13) -0.0003(13)
 C2 0.0297(19) 0.034(2) 0.0203(19) 0.0013(16) 0.0005(15) -0.0116(15)
 C3 0.0233(18) 0.050(3) 0.028(2) 0.0020(18) 0.0019(16) -0.0069(17)
 C4 0.0252(18) 0.028(2) 0.0193(17) 0.0049(16) -0.0002(14) 0.0073(14)
 C5 0.0189(15) 0.0303(19) 0.0209(18) -0.0028(16) 0.0032(13) 0.0004(14)
 C6 0.031(2) 0.027(2) 0.029(2) 0.0024(16) 0.0030(16) -0.0009(15)
 C7 0.041(2) 0.043(2) 0.030(2) 0.014(2) 0.0010(18) -0.0035(19)
 C8 0.048(3) 0.063(3) 0.019(2) 0.005(2) -0.0004(18) -0.009(2)
 C9 0.056(3) 0.048(3) 0.026(2) -0.010(2) 0.0053(19) -0.007(2)
 C10 0.038(2) 0.033(2) 0.030(2) -0.0037(17) 0.0069(18) -0.0009(16)
 C11 0.0206(17) 0.029(2) 0.0241(19) -0.0023(15) 0.0000(14) -0.0039(13)
 C12 0.0278(18) 0.031(2) 0.027(2) -0.0030(16) -0.0004(15) 0.0001(15)
 C13 0.032(2) 0.037(2) 0.035(2) 0.0079(19) -0.0029(17) 0.0032(17)
 C14 0.0233(18) 0.052(3) 0.027(2) 0.0006(19) 0.0010(15) -0.0034(16)
 C15 0.035(2) 0.047(3) 0.033(2) -0.015(2) -0.0023(17) -0.0013(18)
 C16 0.038(2) 0.029(2) 0.034(2) -0.0070(19) -0.0064(17) 0.0011(17)
 C17 0.045(2) 0.072(3) 0.029(2) 0.003(2) -0.0027(18) -0.004(2)

_geom_special_details
;
 All esds (except the esd in the dihedral angle between two l.s. planes)
 are estimated using the full covariance matrix.  The cell esds are taken
 into account individually in the estimation of esds in distances, angles
 and torsion angles; correlations between esds in cell parameters are only
 used when they are defined by crystal symmetry.  An approximate (isotropic)
 treatment of cell esds is used for estimating esds involving l.s. planes.
;
loop_
  _geom_bond_atom_site_label_1
  _geom_bond_atom_site_label_2
  _geom_bond_distance
  _geom_bond_site_symmetry_2
  _geom_bond_publ_flag
 Br1 C2 1.961(4) . ?
 S1 O3 1.425(3) . ?
 S1 O4 1.424(3) . ?
 S1 N1 1.694(3) . ?
 S1 C11 1.757(4) . ?
 O1 C3 1.447(5) . ?
 O1 C4 1.337(4) . ?
 O2 C4 1.199(5) . ?
 N1 C1 1.482(4) . ?
 N1 C4 1.390(4) . ?
 C1 C2 1.520(5) . ?
 C1 C5 1.522(5) . ?
 C2 C3 1.490(6) . ?
 C5 C6 1.383(5) . ?
 C5 C10 1.389(5) . ?
 C6 C7 1.396(6) . ?
 C7 C8 1.368(6) . ?
 C8 C9 1.384(7) . ?
 C9 C10 1.388(6) . ?
 C11 C12 1.386(5) . ?
 C11 C16 1.379(5) . ?
 C12 C13 1.383(5) . ?
 C13 C14 1.387(6) . ?
 C14 C15 1.384(6) . ?
 C14 C17 1.495(5) . ?
 C15 C16 1.391(6) . ?

loop_
  _geom_angle_atom_site_label_1
  _geom_angle_atom_site_label_2
  _geom_angle_atom_site_label_3
  _geom_angle
  _geom_angle_site_symmetry_1
  _geom_angle_site_symmetry_3
  _geom_angle_publ_flag
 O3 S1 N1 108.16(16) . . ?
 O3 S1 C11 110.12(18) . . ?
 O4 S1 O3 119.86(19) . . ?
 O4 S1 N1 103.52(16) . . ?
 O4 S1 C11 109.22(17) . . ?
 N1 S1 C11 104.74(15) . . ?
 C4 O1 C3 121.3(3) . . ?
 C1 N1 S1 117.9(2) . . ?
 C4 N1 S1 117.0(2) . . ?
 C4 N1 C1 124.2(3) . . ?
 N1 C1 C2 107.8(3) . . ?
 N1 C1 C5 113.6(3) . . ?
 C2 C1 C5 109.9(3) . . ?
 C1 C2 Br1 110.5(2) . . ?
 C3 C2 Br1 110.4(3) . . ?
 C3 C2 C1 109.8(3) . . ?
 O1 C3 C2 110.7(3) . . ?
 O1 C4 N1 118.6(3) . . ?
 O2 C4 O1 119.2(3) . . ?
 O2 C4 N1 122.2(3) . . ?
 C6 C5 C1 122.9(3) . . ?
 C6 C5 C10 119.0(4) . . ?
 C10 C5 C1 118.1(3) . . ?
 C5 C6 C7 120.1(4) . . ?
 C8 C7 C6 120.6(4) . . ?
 C7 C8 C9 119.8(4) . . ?
 C8 C9 C10 119.9(4) . . ?
 C9 C10 C5 120.6(4) . . ?
 C12 C11 S1 118.3(3) . . ?
 C16 C11 S1 120.2(3) . . ?
 C16 C11 C12 121.5(4) . . ?
 C13 C12 C11 118.5(4) . . ?
 C12 C13 C14 121.8(4) . . ?
 C13 C14 C17 121.9(4) . . ?
 C15 C14 C13 118.2(4) . . ?
 C15 C14 C17 119.9(4) . . ?
 C14 C15 C16 121.5(4) . . ?
 C11 C16 C15 118.6(4) . . ?

loop_
  _geom_torsion_atom_site_label_1
  _geom_torsion_atom_site_label_2
  _geom_torsion_atom_site_label_3
  _geom_torsion_atom_site_label_4
  _geom_torsion
  _geom_torsion_site_symmetry_1
  _geom_torsion_site_symmetry_2
  _geom_torsion_site_symmetry_3
  _geom_torsion_site_symmetry_4
  _geom_torsion_publ_flag
 Br1 C2 C3 O1 62.9(3) . . . . ?
 S1 N1 C1 C2 150.7(2) . . . . ?
 S1 N1 C1 C5 -87.3(3) . . . . ?
 S1 N1 C4 O1 -177.2(3) . . . . ?
 S1 N1 C4 O2 2.5(4) . . . . ?
 S1 C11 C12 C13 179.6(3) . . . . ?
 S1 C11 C16 C15 -179.4(3) . . . . ?
 O3 S1 N1 C1 134.6(3) . . . . ?
 O3 S1 N1 C4 -55.4(3) . . . . ?
 O3 S1 C11 C12 -167.1(3) . . . . ?
 O3 S1 C11 C16 13.2(4) . . . . ?
 O4 S1 N1 C1 6.4(3) . . . . ?
 O4 S1 N1 C4 176.5(3) . . . . ?
 O4 S1 C11 C12 -33.5(3) . . . . ?
 O4 S1 C11 C16 146.7(3) . . . . ?
 N1 S1 C11 C12 76.9(3) . . . . ?
 N1 S1 C11 C16 -102.9(3) . . . . ?
 N1 C1 C2 Br1 -71.5(3) . . . . ?
 N1 C1 C2 C3 50.5(4) . . . . ?
 N1 C1 C5 C6 -1.5(5) . . . . ?
 N1 C1 C5 C10 177.9(3) . . . . ?
 C1 N1 C4 O1 -7.9(5) . . . . ?
 C1 N1 C4 O2 171.8(3) . . . . ?
 C1 C2 C3 O1 -59.2(4) . . . . ?
 C1 C5 C6 C7 -179.6(3) . . . . ?
 C1 C5 C10 C9 180.0(4) . . . . ?
 C2 C1 C5 C6 119.4(4) . . . . ?
 C2 C1 C5 C10 -61.2(4) . . . . ?
 C3 O1 C4 O2 -179.3(3) . . . . ?
 C3 O1 C4 N1 0.4(5) . . . . ?
 C4 O1 C3 C2 33.4(5) . . . . ?
 C4 N1 C1 C2 -18.5(4) . . . . ?
 C4 N1 C1 C5 103.5(4) . . . . ?
 C5 C1 C2 Br1 164.2(2) . . . . ?
 C5 C1 C2 C3 -73.8(4) . . . . ?
 C5 C6 C7 C8 -0.2(6) . . . . ?
 C6 C5 C10 C9 -0.6(6) . . . . ?
 C6 C7 C8 C9 -1.0(7) . . . . ?
 C7 C8 C9 C10 1.4(7) . . . . ?
 C8 C9 C10 C5 -0.6(7) . . . . ?
 C10 C5 C6 C7 1.0(6) . . . . ?
 C11 S1 N1 C1 -108.0(3) . . . . ?
 C11 S1 N1 C4 62.0(3) . . . . ?
 C11 C12 C13 C14 0.2(6) . . . . ?
 C12 C11 C16 C15 0.8(6) . . . . ?
 C12 C13 C14 C15 -0.1(6) . . . . ?
 C12 C13 C14 C17 -179.9(4) . . . . ?
 C13 C14 C15 C16 0.3(6) . . . . ?
 C14 C15 C16 C11 -0.7(6) . . . . ?
 C16 C11 C12 C13 -0.6(5) . . . . ?
 C17 C14 C15 C16 -179.9(4) . . . . ?

_shelx_res_file
;
TITL sa3720 in P2(1)
CELL 0.71073 7.8188 11.246 9.6401 90 94.539 90
ZERR 2 0.002 0.0027 0.0024 0 0.004 0
LATT -1
SYMM -X,0.5+Y,-Z

SFAC C H Br N O S
UNIT 34 32 2 2 8 2

L.S. 4
PLAN  20
BOND
MORE -1
fmap 2
acta 52
CONF
OMIT -4 0 5
OMIT 0 -6 2
OMIT -1 7 5
OMIT 0 -5 2
OMIT 2 5 6
OMIT 1 7 5
OMIT 0 -4 3
OMIT 0 0 1
OMIT 0 -3 2
REM <HKL>D:/D/SXRD/sa(3700-3799)/sa3720/sa3720.hkl</HKL>

WGHT    0.022700    0.131900
FVAR       8.38822
BR1   3    0.647396    0.120200    0.649570    11.00000    0.04853    0.03129 =
         0.02856    0.00814    0.00457   -0.00445
S1    6    0.946857    0.434510    0.534602    11.00000    0.02487    0.02442 =
         0.02431    0.00126    0.00004   -0.00505
O1    5    0.467302    0.369550    0.579236    11.00000    0.02173    0.04489 =
         0.03132    0.00074    0.00416    0.00450
O2    5    0.653002    0.497003    0.674233    11.00000    0.04066    0.03040 =
         0.02583   -0.00321    0.00001    0.01151
O3    5    0.932056    0.560145    0.518443    11.00000    0.04289    0.02648 =
         0.03977    0.00705   -0.00353   -0.00759
O4    5    1.044402    0.367744    0.443201    11.00000    0.02212    0.04439 =
         0.02929   -0.00143    0.00584   -0.00643
N1    4    0.747884    0.374817    0.509601    11.00000    0.02009    0.02165 =
         0.02094   -0.00195    0.00046   -0.00060
C1    1    0.725709    0.267994    0.420041    11.00000    0.02116    0.01963 =
         0.02234   -0.00026    0.00209   -0.00029
AFIX  13
H1    2    0.830753    0.220310    0.431970    11.00000   -1.20000
AFIX   0
C2    1    0.578630    0.195424    0.470221    11.00000    0.02974    0.03411 =
         0.02032    0.00131    0.00046   -0.01160
AFIX  13
H2    2    0.547982    0.133055    0.401721    11.00000   -1.20000
AFIX   0
C3    1    0.426431    0.273328    0.482628    11.00000    0.02333    0.04971 =
         0.02825    0.00202    0.00186   -0.00690
AFIX  23
H3A   2    0.389167    0.305769    0.392006    11.00000   -1.20000
H3B   2    0.332969    0.226623    0.514652    11.00000   -1.20000
AFIX   0
C4    1    0.623834    0.418139    0.592055    11.00000    0.02524    0.02832 =
         0.01929    0.00494   -0.00020    0.00732
C5    1    0.690242    0.296738    0.266198    11.00000    0.01894    0.03031 =
         0.02091   -0.00281    0.00316    0.00045
C6    1    0.676009    0.411795    0.216016    11.00000    0.03108    0.02716 =
         0.02887    0.00238    0.00297   -0.00093
AFIX  43
H6    2    0.688882    0.475668    0.277227    11.00000   -1.20000
AFIX   0
C7    1    0.642346    0.432246    0.073623    11.00000    0.04065    0.04284 =
         0.02993    0.01430    0.00102   -0.00354
AFIX  43
H7    2    0.632636    0.509825    0.040527    11.00000   -1.20000
AFIX   0
C8    1    0.623520    0.339110   -0.017654    11.00000    0.04766    0.06279 =
         0.01911    0.00537   -0.00043   -0.00938
AFIX  43
H8    2    0.599294    0.353337   -0.112202    11.00000   -1.20000
AFIX   0
C9    1    0.640651    0.223691    0.031205    11.00000    0.05572    0.04842 =
         0.02575   -0.00998    0.00526   -0.00691
AFIX  43
H9    2    0.630428    0.160216   -0.030731    11.00000   -1.20000
AFIX   0
C10   1    0.673106    0.202726    0.172739    11.00000    0.03827    0.03337 =
         0.02954   -0.00374    0.00692   -0.00092
AFIX  43
H10   2    0.683471    0.125004    0.205273    11.00000   -1.20000
AFIX   0
C11   1    1.015710    0.399206    0.707590    11.00000    0.02063    0.02861 =
         0.02407   -0.00229    0.00003   -0.00386
C12   1    1.070942    0.284251    0.737393    11.00000    0.02783    0.03120 =
         0.02676   -0.00303   -0.00035    0.00009
AFIX  43
H12   2    1.070896    0.227187    0.667566    11.00000   -1.20000
AFIX   0
C13   1    1.126129    0.256325    0.873328    11.00000    0.03199    0.03717 =
         0.03493    0.00786   -0.00291    0.00324
AFIX  43
H13   2    1.163767    0.179479    0.894300    11.00000   -1.20000
AFIX   0
C14   1    1.126845    0.339849    0.979204    11.00000    0.02332    0.05243 =
         0.02666    0.00064    0.00101   -0.00336
C15   1    1.070462    0.453743    0.945680    11.00000    0.03497    0.04714 =
         0.03264   -0.01465   -0.00226   -0.00132
AFIX  43
H15   2    1.070645    0.510909    1.015402    11.00000   -1.20000
AFIX   0
C16   1    1.013559    0.484617    0.810124    11.00000    0.03802    0.02854 =
         0.03426   -0.00695   -0.00640    0.00111
AFIX  43
H16   2    0.974885    0.561209    0.789060    11.00000   -1.20000
AFIX   0
C17   1    1.186630    0.310098    1.126257    11.00000    0.04506    0.07183 =
         0.02903    0.00332   -0.00272   -0.00357
AFIX 137
H17A  2    1.095280    0.323990    1.185195    11.00000   -1.50000
H17B  2    1.283062    0.359227    1.155966    11.00000   -1.50000
H17C  2    1.219936    0.227974    1.132035    11.00000   -1.50000
AFIX   0
HKLF 4

REM  sa3720 in P2(1)
REM R1 =  0.0301 for    3551 Fo > 4sig(Fo)  and  0.0316 for all    3669 data
REM    218 parameters refined using      1 restraints

END

WGHT      0.0227      0.1319

REM Highest difference peak  0.267,  deepest hole -0.235,  1-sigma level  0.052
Q1    1   0.6942  0.1258  0.5437  11.00000  0.05    0.27
Q2    1   0.6899  0.3039  0.3439  11.00000  0.05    0.22
Q3    1   0.7383  0.2860  0.3198  11.00000  0.05    0.22
Q4    1   1.0845  0.3578  0.7068  11.00000  0.05    0.21
Q5    1   0.6601  0.3537  0.2413  11.00000  0.05    0.21
Q6    1   1.0257  0.4313  0.7579  11.00000  0.05    0.20
Q7    1   0.3175  0.1184  0.4809  11.00000  0.05    0.19
Q8    1   0.7193  0.0239  0.6151  11.00000  0.05    0.19
Q9    1   0.5612  0.1417  0.6566  11.00000  0.05    0.19
Q10   1   0.9998  0.2975  1.1206  11.00000  0.05    0.18
Q11   1   1.3304  0.2853  1.1414  11.00000  0.05    0.18
Q12   1   0.6820  0.2522  0.2277  11.00000  0.05    0.18
Q13   1   0.6084  0.2855  0.0247  11.00000  0.05    0.18
Q14   1   0.8672  0.6611  0.4600  11.00000  0.05    0.18
Q15   1   0.8629  0.4223  0.5182  11.00000  0.05    0.18
Q16   1   0.7403  0.3153  0.4608  11.00000  0.05    0.18
Q17   1   0.9966  0.3627  0.4977  11.00000  0.05    0.18
Q18   1   1.3074  0.3811  0.7596  11.00000  0.05    0.17
Q19   1   0.9951  0.3411  0.3229  11.00000  0.05    0.17
Q20   1   0.6950  0.2784 -0.1640  11.00000  0.05    0.17
;
_shelx_res_checksum               87808
_shelx_hkl_file
;
   0   0  -1   54.66   29.41   1 0.97363-0.97955-0.19681 0.19681-0.11536 0.04162
   0   0  -2304325.0 4266.19   1 0.97299-0.98484-0.17334 0.17334-0.15242 0.00494
   0   0   2271710.3 3826.94   1 0.96416-0.95236-0.26530 0.26530-0.00291 0.15041
   0   0  -2282528.5 3923.40   1-0.99697 0.98513-0.07744 0.07744 0.00588-0.15336
   0   0   2275110.2 3838.82   1 0.46984-0.45819 0.88196-0.88196 0.03707 0.11040
   0   0  -3 6454.06  304.53   1 0.97047-0.98825-0.14946 0.14946-0.18932-0.03189
   0   0   3 6174.98  316.47   1-0.95754 0.97523 0.21865-0.21865 0.18790 0.03316
   0   0  -3 7552.24  643.59   1 0.26139-0.27889 0.95616-0.95616-0.13199-0.08923
   0   0   3 6400.35  216.73   1 0.50804-0.49056 0.85838-0.85838 0.07115 0.15006
   0   0  -4 5754.33  545.72   1 0.96603-0.98974-0.12514 0.12514-0.22608-0.06888
   0   0   4 4823.83  528.31   1 0.94841-0.92481-0.30862 0.30862 0.07255 0.22242
   0   0   4 4497.77  573.01   1-0.93498 0.95858 0.27565-0.27565 0.22317 0.07157
   0   0  -4 5817.64  597.92   1 0.21665-0.24005 0.96209-0.96209-0.16563-0.12939
   0   0   4 5022.32  255.49   1 0.54497-0.52167 0.83180-0.83180 0.10534 0.18962
   0   0  -510300.97 1234.85   1 0.95960-0.98914-0.10130 0.10130-0.26248-0.10640
   0   0   5 7871.33  315.62   1-0.90756 0.93691 0.33152-0.33152 0.25771 0.11080
   0   0  -5 9803.20  862.12   1 0.16975-0.19900 0.96518-0.96518-0.19902-0.16976
   0   0  -6103402.1 3169.99   1 0.95123-0.98668-0.07611 0.07611-0.29894-0.14372
   0   0   690920.69 2736.18   1-0.87414 0.90936 0.38798-0.38798 0.29213 0.15008
   0   0  -6102959.9 3282.43   1 0.12148-0.15658 0.96502-0.96502-0.23230-0.21024
   0   0  -732392.69 1269.41   1 0.94078-0.98214-0.05045 0.05045-0.33522-0.18121
   0   0   727320.23 1060.24   1-0.83452 0.87561 0.44413-0.44413 0.32606 0.18985
   0   0   729941.92 1118.79   1 0.91287-0.87245 0.36223-0.36223 0.18829 0.32803
   0   0  -732313.08 1350.76   1 0.07176-0.11272 0.96144-0.96144-0.26546-0.25083
   0   0  -8 1305.82  431.19   1 0.92817-0.97544-0.02429 0.02429-0.37134-0.21887
   0   0   8 1514.46  247.77   1 0.87745-0.83127 0.42190-0.42190 0.22817 0.36191
   0   0  -8 2284.51  405.23   1 0.01884-0.06563 0.95425-0.95425-0.29838-0.29168
   0   0  -914283.88 1027.97   1 0.91330-0.96648 0.00236-0.00236-0.40727-0.25672
   0   0   915080.37 1037.10   1 0.83398-0.78202 0.48195-0.48195 0.26868 0.39516
   0   0  -915380.57 1044.30   1-0.03406-0.01857 0.94290-0.94290-0.33130-0.33253
   0   0 -1030359.45 1532.32   1-0.08884 0.03035 0.92712-0.92712-0.36406-0.37352
   0   0  11 7308.96  806.23   1-0.87644 0.94118-0.05873 0.05873 0.47789 0.33273
   0   0  12  543.19  325.79   1-0.85384 0.92447-0.08716 0.08716 0.51317 0.37115
   0  -1   0  131.76   50.81   1-0.99888 0.99888-0.03160-0.03160 0.03506-0.03506
   0   1   0   48.66   34.77   1 0.82641-0.82641 0.03159 0.03159 0.56217-0.56217
   0  -1   2149240.5 2173.67   1 0.97267-0.96082-0.21670 0.15349-0.08329 0.23077
   0  -1  -2150310.5 2137.97   1 0.97183-0.98368-0.22523 0.16202-0.06934-0.07813
   0  -1  -2152281.8 2203.49   1-0.99810 0.98625-0.05893-0.00427 0.01768-0.16516
   0  -1   2158564.4 2186.26   1-0.77177 0.78357 0.51655-0.57973 0.37086-0.22342
   0  -1   2152005.4 2182.13   1 0.72359-0.71194 0.62284-0.68603 0.29744-0.14995
   0  -1  -3 8106.28  301.06   1 0.97315-0.99093-0.17599 0.11278-0.14829-0.07293
   0  -1   3 7955.05  806.22   1 0.96779-0.95009-0.25013 0.18693-0.02852 0.24976
   0  -1  -3 7719.46  299.89   1-0.99456 0.97678-0.10359 0.04039-0.01085-0.21036
   0   1   311414.79  470.42   1-0.97507 0.99277 0.16140-0.09825 0.15222 0.06884
   0  -1   3 8088.15  233.17   1-0.85874 0.87635 0.41095-0.47411 0.30605-0.08494
   0  -1  -3 7859.70  260.72   1-0.10729 0.08974 0.92087-0.98406-0.37480 0.15352
   0   1   312265.59  459.13   1 0.20899-0.19143 0.96282-0.89963-0.17115 0.39242
   0  -1   3 8257.08  289.07   1 0.69148-0.67401 0.67459-0.73778 0.25839-0.03716
   0  -1  -4187284.4 2732.97   1 0.96905-0.99275-0.14048 0.07727-0.20299-0.09197
   0   1   4198274.9 2880.43   1 0.92155-0.89795-0.35485 0.41805 0.15750 0.13748
   0   1   4182215.5 2663.65   1-0.95874 0.98234 0.21518-0.15204 0.18574 0.10900
   0  -1   4190021.8 2676.84   1-0.85005 0.87353 0.42324-0.48640 0.31348-0.01867
   0  -1  -4189754.7 2750.07   1-0.06529 0.04190 0.93441-0.99760-0.35015 0.05511
   0   1   4198520.7 2862.44   1 0.33899-0.31565 0.93799-0.87482-0.07249 0.36747
   0   1  -4204566.9 2978.00   1 0.43226-0.45560 0.90174-0.83857 0.00370-0.29868
   0  -1   4184605.3 2703.62   1 0.68288-0.65958 0.68699-0.75018 0.24840 0.04656
   0  -1  -5218156.3 5270.91   1 0.96216-0.99180-0.10932 0.04612-0.24955-0.11914
   0   1  -5216993.2 5159.09   1 0.95525-0.98479-0.08751 0.15071-0.28254-0.08634
   0   1   5190173.2 4497.22   1 0.91242-0.88292-0.36708 0.43029 0.18088 0.18784
   0  -1   5210715.0 4907.27   1-0.82277 0.85213 0.45910-0.52225 0.33505 0.03346
   0  -1   5213187.5 4968.69   1 0.92054-0.89167 0.34747-0.41072 0.17848 0.19031
   0  -1  -5216008.9 5075.83   1-0.05942 0.03018 0.93611-0.99929-0.34664-0.02215
   0   1  -5213299.2 5047.45   1 0.35564-0.38482 0.93273-0.86957-0.05928-0.30942
   0   1   5203369.6 4789.01   1 0.43053-0.40136 0.90256-0.83940 0.00224 0.36647
   0  -1   5202011.7 4771.68   1 0.68715-0.65803 0.68091-0.74409 0.25334 0.11537
   0   1  -673544.25 2322.09   1 0.94753-0.98299-0.06648 0.12969-0.31264-0.13001
   0  -1  -684388.12 2608.16   1 0.95297-0.98843-0.08092 0.01772-0.29203-0.15063
   0   1   664576.23 1984.35   1-0.91140 0.94662 0.32431-0.26115 0.25329 0.18892
   0  -1   674781.92 2251.40   1-0.78629 0.82168 0.50100-0.56419 0.36157 0.08073
   0  -1   676185.83 2294.90   1 0.88994-0.85530 0.40222-0.46546 0.21497 0.22758
   0  -1  -677321.31 2380.93   1-0.07263 0.03754 0.93222-0.99540-0.35451-0.08803
   0   1  -676456.07 2373.12   1 0.28547-0.32048 0.95159-0.88843-0.11387-0.32858
   0   1   671765.39 2196.06   1 0.50048-0.46551 0.86335-0.80018 0.06430 0.37814
   0   1  -731774.08 1239.65   1 0.93784-0.97921-0.04398 0.10718-0.34424-0.17220
   0  -1  -724800.38  993.48   1 0.94156-0.98292-0.05220-0.01099-0.33276-0.18367
   0  -1   723533.18  850.66   1-0.73963 0.78092 0.54856-0.61175 0.38989 0.12614
   0  -1   725258.07  929.00   1 0.85155-0.81114 0.45907-0.52231 0.25319 0.26313
   0  -1  -724801.45  943.64   1-0.09735 0.05641 0.92430-0.98748-0.36904-0.14727
   0   1  -731904.67 1212.88   1 0.21976-0.26072 0.96177-0.89859-0.16337-0.35292
   0   1  -830469.12 1345.46   1 0.92609-0.97336-0.02033 0.08354-0.37674-0.21348
   0  -1  -827993.59 1166.55   1 0.92786-0.97513-0.02369-0.03950-0.37216-0.21805
   0  -1   825580.75  982.29   1-0.68339 0.73058 0.59790-0.66109 0.41889 0.17085
   0  -1   829115.53 1129.05   1 0.80416-0.75798 0.51731-0.58055 0.29274 0.29734
   0   1   828307.20 1202.19   1 0.91164-0.86545 0.36452-0.30127 0.18981 0.40026
   0  -1  -831909.02 1287.51   1-0.12982 0.08303 0.91259-0.97578-0.38770-0.20237
   0   1  -829964.72 1267.41   1 0.15515-0.20197 0.96548-0.90230-0.20919-0.38086
   0   1  -921843.87 1495.12   1 0.91216-0.96535 0.00425 0.05895-0.40979-0.25420
   0  -1  -917224.66 1180.78   1 0.91178-0.96497 0.00488-0.06808-0.41063-0.25337
   0  -1   915603.89 1004.52   1 0.74695-0.69472 0.57545-0.63869 0.33303 0.33078
   0   1   919881.10 1322.26   1 0.87752-0.82556 0.42180-0.35855 0.22810 0.43574
   0   1  -919773.52 1319.09   1 0.09130-0.14397 0.96326-0.90007-0.25256-0.41125
   0   1  10 3518.03  599.08   1-0.89339 0.95224-0.03518 0.09838 0.44789 0.28904
   0   1  10 2562.06  444.51   1 0.83568-0.77795 0.47980-0.41656 0.26722 0.47038
   0   1 -10 2484.85  552.12   1 0.02573-0.08421 0.95545-0.89226-0.29401-0.44357
   0   1  1124237.75 1891.46   1-0.87211 0.93685-0.06442 0.12761 0.48503 0.32560
   0  -1  1129018.55 2227.70   1-0.87758 0.94232-0.05722-0.00597 0.47599 0.33464
   0   1 -1121310.79 1848.21   1-0.03892-0.02541 0.94167-0.87848-0.33426-0.47708
   0   1  1216317.95 1481.48   1-0.84792 0.91854-0.09415 0.15734 0.52168 0.36264
   0  -1  1218076.41 1729.67   1-0.85627 0.92689-0.08424 0.02105 0.50960 0.37472
   0  -2   0229765.0 3235.16   1-0.99788 0.99788-0.06320-0.06320 0.01496-0.01496
   0   2   0226961.5 3197.92   1-0.99348 0.99348 0.06320 0.06320 0.09486-0.09486
   0   2   0217820.2 3060.69   1 0.82990-0.82990 0.06318 0.06318 0.55431-0.55431
   0   2  -2187068.0 2738.64   1 0.95563-0.96745-0.08865 0.21506-0.28088 0.13333
   0  -2  -2179413.5 2501.29   1 0.95442-0.96622-0.29461 0.16821 0.04774-0.19523
   0   2   2179662.7 2499.17   1 0.68691-0.67516-0.51383 0.64024 0.51392-0.36638
   0   2   2174585.8 2535.70   1-0.98752 0.99932 0.10534 0.02093 0.11706 0.03031
   0   2  -2181953.4 2622.71   1 0.74064-0.75229 0.59102-0.46464 0.31958-0.46707
   0  -2   2180481.8 2598.85   1 0.80518-0.79343 0.41714-0.54348 0.42150-0.27400
   0  -2   3205883.5 3010.11   1 0.97127-0.95349-0.22975 0.10334-0.06191 0.28313
   0  -2  -3213885.4 3020.92   1 0.97359-0.99137-0.19888 0.07247-0.11204-0.10917
   0  -2  -3215511.6 3128.80   1-0.99478 0.97701-0.10151-0.02490-0.00951-0.21170
   0   2   3200149.5 2852.26   1-0.10166 0.11921 0.92283-0.79646-0.37154 0.59282
   0   2  -3203342.5 2948.28   1 0.65347-0.67094 0.72562-0.59924 0.21550-0.43673
   0  -2   3209775.0 3033.45   1 0.77782-0.76020 0.50515-0.63149 0.37391-0.15265
   0   2   3213095.7 3043.77   1 0.42209-0.40455-0.73343 0.85979 0.53283-0.31160
   0  -2  -4231785.9 3323.04   1 0.97045-0.99416-0.14933 0.02292-0.18952-0.10543
   0   2   4224880.5 3213.34   1 0.86179-0.83829-0.41878 0.54515 0.28623 0.00875
   0   2   4208034.9 3035.62   1-0.96656 0.99016 0.19121-0.06493 0.17083 0.12391
   0   2   4232875.7 3326.37   1 0.10191-0.07851 0.96402-0.83766-0.24548 0.54051
   0   2  -4231708.9 3373.59   1 0.56841-0.59171 0.81276-0.68643 0.12773-0.42270
   0  -2   4216665.5 3158.93   1 0.76123-0.73774 0.54657-0.67291 0.34895-0.05394
   0   2  -5 3287.92  598.70   1 0.94900-0.97854-0.07021 0.19662-0.30735-0.06153
   0  -2  -5 3290.10  458.90   1 0.96274-0.99237-0.11148-0.01492-0.24637-0.12233
   0   2   5 2919.46  191.34   1 0.86474-0.83536-0.41627 0.54264 0.28095 0.08777
   0  -2   5 2815.26  114.10   1-0.46168 0.49121 0.73522-0.86162 0.49627-0.12769
   0  -2   5 3048.73  145.54   1 0.68946-0.66044 0.62437-0.75086 0.36714 0.00164
   0   2   5 2426.68  406.11   1 0.25049-0.22123 0.95781-0.83144-0.14086 0.50965
   0   2  -5 2268.33  238.31   1 0.48773-0.51687 0.87138-0.74505 0.05288-0.42159
   0   2  -6117723.5 3621.99   1 0.94198-0.97743-0.05316 0.17957-0.33142-0.11123
   0  -2  -6126619.8 3812.03   1 0.95237-0.98782-0.07924-0.04716-0.29445-0.14821
   0  -2   6118690.2 3490.89   1 0.69826-0.66344 0.61741-0.74390 0.36225 0.08028
   0   2   6107917.1 3241.33   1 0.36267-0.32766 0.93037-0.80404-0.05366 0.49612
   0   2  -6110099.5 3348.19   1 0.41218-0.44719 0.91100-0.78468-0.01317-0.42928
   0   2  -7137045.0 4525.33   1 0.93297-0.97434-0.03378 0.16019-0.35834-0.15810
   0  -2  -7168306.1 5466.55   1 0.93960-0.98096-0.04782-0.07858-0.33890-0.17754
   0  -2   7151985.4 4846.82   1-0.48012 0.52146 0.72651-0.85292 0.49157 0.02443
   0  -2   7159108.7 5076.42   1 0.66396-0.62334 0.64360-0.77009 0.38068 0.13561
   0   2  -7146639.7 4800.47   1 0.33903-0.37987 0.93797-0.81165-0.07246-0.44373
   0   2  -825859.69 1483.73   1 0.92195-0.96922-0.01269 0.13909-0.38710-0.20312
   0  -2  -820106.48 1701.52   1 0.92446-0.97173-0.01728-0.10912-0.38088-0.20934
   0  -2   819264.36 1920.36   1 0.60338-0.55696 0.68420-0.81070 0.40961 0.18044
   0   2  -826782.76 1469.54   1 0.26798-0.31466 0.95500-0.82868-0.12706-0.46288
   0   2  -9 7867.94  660.42   1 0.90881-0.96199 0.00976 0.11664-0.41709-0.24690
   0  -2  -9 8083.62  700.77   1 0.90685-0.96003 0.01291-0.13932-0.42125-0.24274
   0   2   9 6017.87  588.44   1 0.90111-0.84915 0.38343-0.25694 0.20242 0.46142
   0   2  -9 6645.33 1108.19   1 0.19893-0.25159 0.96364-0.83727-0.17836-0.48545
   0   2  1026760.84 2187.91   1-0.88671 0.94556-0.04473 0.17112 0.46014 0.27679
   0  -2  1026634.69 2253.73   1-0.89380 0.95266-0.03457-0.09181 0.44711 0.28983
   0   2  1026483.98 2195.85   1 0.86664-0.80890 0.43797-0.31149 0.23897 0.49863
   0   2 -1026542.67 2214.58   1 0.12952-0.18803 0.96528-0.83891-0.22683-0.51074
   0  -2  11 7355.93  761.83   1-0.87609 0.94083-0.05920-0.06718 0.47849 0.33214
   0   2  11 6085.15 1082.50   1-0.86364 0.92838-0.07519 0.20158 0.49845 0.31218
   0   2 -11 5409.09 1400.14   1 0.05981-0.12418 0.96007-0.83370-0.27327-0.53805
   0  -2  12 4177.53 1193.51   1-0.85583 0.92646-0.08477-0.04162 0.51025 0.37408
   0   2  12 3601.08  994.52   1-0.83748 0.90811-0.10607 0.23246 0.53606 0.34827
   0  -3   0 -132.07  108.34   1 0.95762-0.95762-0.09480-0.09480-0.27197 0.27197
   0  -3   0  276.57  217.53   1-0.84737 0.84737-0.09479-0.09479 0.52247-0.52247
   0  -3   0  -68.54  168.62   1-0.99548 0.99548-0.09481-0.09481-0.00522 0.00522
   0   3   0 1847.26  432.34   1 0.83250-0.83250 0.09478 0.09478 0.54584-0.54584
   0  -3   0  -24.46  179.18   1 0.80366-0.80366-0.09478-0.09478 0.58749-0.58749
   0  -3  -2 -112.42   40.40   1 0.88186-0.89361-0.40063 0.21108 0.24860-0.39609
   0   3  -3128200.9 2015.62   1 0.94528-0.96301-0.06093 0.25054-0.32050 0.09917
   0   3   3125279.9 1776.47   1 0.57117-0.55380-0.54432 0.73399 0.61438-0.39312
   0   3   3118434.0 1860.96   1-0.97845 0.99615 0.14805 0.04136 0.14387 0.07719
   0   3   3127316.5 1893.52   1 0.60889-0.59142-0.52516 0.71473 0.59452-0.37331
   0   3  -412999.22  864.22   1 0.94453-0.96816-0.05912 0.24873-0.32305 0.02794
   0  -3  -410834.87  504.05   1 0.97014-0.99385-0.14725-0.04236-0.19269-0.10226
   0   3   414617.36  415.16   1 0.72730-0.70379-0.49845 0.68807 0.47177-0.17668
   0   3   415083.87  472.36   1-0.10615 0.12955 0.92127-0.73171-0.37414 0.66918
   0   3  -413906.76  538.25   1 0.64827-0.67156 0.73191-0.54235 0.20985-0.50482
   0   3   414797.41  485.87   1 0.52703-0.50365-0.62887 0.81841 0.57161-0.27663
   0   3  -597046.02 2473.09   1 0.94069-0.97023-0.05023 0.23985-0.33552-0.03336
   0  -3  -576155.93 1958.39   1 0.96059-0.99014-0.10473-0.08487-0.25746-0.11142
   0   3   589046.53 2144.73   1 0.77289-0.74351-0.47727 0.66689 0.41813-0.04927
   0   3   581033.54 1972.02   1 0.07161-0.04235 0.96142-0.77187-0.26556 0.63435
   0   3  -590412.10 2269.12   1 0.57568-0.60481 0.80648-0.61697 0.13481-0.50352
   0   3   593344.05 2294.43   1 0.46952-0.44029-0.68952 0.87906 0.55145-0.18272
   0  -3  -6 2865.38  432.49   1 0.94826-0.98371-0.06832-0.12128-0.31004-0.13262
   0   3  -6 1709.72  356.19   1 0.93450-0.96996-0.03691 0.22653-0.35402-0.08864
   0   3   6 1053.20  139.41   1 0.78508-0.74982-0.47079 0.66041 0.40248 0.04014
   0   3   6  867.70  163.52   1 0.21615-0.18104 0.96214-0.77259-0.16599 0.60853
   0   3  -6 2313.01  342.17   1 0.50264-0.53761 0.86194-0.67244 0.06626-0.50872
   0   3   6 2223.04  323.42   1 0.43493-0.39985-0.72204 0.91158 0.53804-0.09556
   0   3  -742032.69 1581.16   1 0.92621-0.96758-0.02057 0.21018-0.37642-0.14002
   0  -3  -746912.78 1621.51   1 0.93360-0.97496-0.03505-0.15455-0.35658-0.15985
   0   3  -739003.94 1620.42   1 0.43098-0.47183 0.90235-0.71287 0.00262-0.51883
   0   3   741481.31 1486.57   1 0.41903-0.37811-0.73609 0.92563 0.53158-0.01535
   0  -3  -867062.32 3376.38   1 0.91657-0.96385-0.00320-0.18640-0.39984-0.19038
   0   3  -880378.58 4094.91   1 0.91587-0.96314-0.00199 0.19161-0.40145-0.18876
   0   3  -878323.28 3961.55   1 0.35917-0.40585 0.93155-0.74207-0.05646-0.53347
   0   3   877094.65 3871.90   1 0.41769-0.37092-0.73724 0.92678 0.53103 0.05893
   0   3  -934980.38 1980.36   1 0.90343-0.95661 0.01830 0.17130-0.42833-0.23566
   0   3   929698.89 1662.10   1 0.91415-0.86219 0.35981-0.17008 0.18668 0.47716
   0   3  -932420.99 1793.62   1 0.28769-0.34021 0.95112-0.76164-0.11219-0.55149
   0   3   932325.19 1770.02   1 0.42772-0.37511-0.72847 0.91801 0.53513 0.12857
   0   3  10 2449.09  411.99   1-0.87472 0.93357-0.06101 0.25059 0.48076 0.25618
   0  -3  10 2295.69  497.91   1-0.88921 0.94807-0.04120-0.14838 0.45562 0.28132
   0   3  10 3339.40  556.57   1 0.88472-0.82698 0.41061-0.22088 0.22059 0.51701
   0   3 -10 3314.74  676.48   1 0.21692-0.27543 0.96206-0.77251-0.16543-0.57214
   0   3  10 2689.98  393.75   1 0.44684-0.38838-0.71115 0.90069 0.54276 0.19469
   0   3  1110333.74 1076.04   1-0.84945 0.91419-0.09235 0.28194 0.51951 0.29112
   0  -3  11 7301.83  955.17   1-0.87230 0.93704-0.06417-0.12541 0.48472 0.32590
   0   3  1112632.89 1320.02   1 0.84879-0.78528 0.46278-0.27305 0.25570 0.55566
   0   3 -11 8267.05 1451.59   1 0.14490-0.20927 0.96551-0.77596-0.21628-0.59504
   0  -3  12 2875.76  857.21   1-0.85293 0.92355-0.08824-0.10133 0.51450 0.36982
   0  -4   0165176.2 2374.25   1 0.96631-0.96631-0.12641-0.12641-0.22418 0.22418
   0  -4   0163350.8 2339.16   1-0.81870 0.81870-0.12639-0.12639 0.56013-0.56013
   0   4   0184930.8 2727.99   1-0.98340 0.98340 0.12628 0.12628 0.13022-0.13022
   0  -4   0156404.7 2309.29   1 0.79575-0.79575-0.12637-0.12637 0.59228-0.59228
   0  -4  -1188687.7 2652.53   1 0.94867-0.95458-0.06937-0.18344-0.30855 0.23477
   0  -4   1184378.5 2682.96   1 0.97216-0.96624-0.16340-0.08941-0.16787 0.24161
   0  -4  -1189712.0 2652.26   1-0.50567 0.49982-0.35488 0.10203 0.78635-0.86009
   0  -4  -1190652.1 2835.37   1-0.99386 0.98793-0.10965-0.14317-0.01473-0.05900
   0   4   1185948.5 2771.46   1-0.98414 0.99004 0.12274 0.12981 0.12800-0.05431
   0   4  -1184317.4 2666.68   1-0.97593 0.97003 0.15811 0.09444 0.15017-0.22386
   0   4  -1188589.7 2780.47   1 0.82768-0.83359 0.29572-0.04301 0.47694-0.55070
   0   4   1182481.3 2670.92   1 0.81312-0.80720-0.05108 0.30383 0.57984-0.50606
   0  -4  -1184025.9 2679.75   1 0.72129-0.72717-0.33149 0.07865 0.60814-0.68193
   0   4  -213608.48  440.44   1 0.92207-0.93388-0.01290 0.26572-0.38680 0.23924
   0   4   212372.87  384.25   1-0.98130 0.99310 0.13589 0.11666 0.13625 0.01112
   0   4  -212013.23  286.37   1-0.94810 0.93630 0.24412 0.00843 0.20370-0.35108
   0   4  -212592.22  415.73   1 0.79772-0.80947 0.44457-0.19189 0.40741-0.55491
   0   4   212173.28  412.21   1 0.76726-0.75551-0.21795 0.47078 0.60315-0.45558
   0  -4  -3  -81.89   37.03   1 0.97313-0.99091-0.21032-0.04249-0.09364-0.12757
   0   4  -444232.10 1287.64   1 0.93251-0.95615-0.03285 0.28567-0.35962 0.06451
   0  -4  -441168.72 1007.30   1 0.96566-0.98937-0.12348-0.12934-0.22856-0.06640
   0   4   442917.05 1043.35   1 0.43065-0.40749-0.56285 0.81575 0.70550-0.41047
   0   4  -439657.85 1133.90   1 0.69478-0.71808 0.66968-0.41693 0.26227-0.55724
   0   4   444275.92 1164.71   1 0.64957-0.62628-0.46352 0.71628 0.60266-0.30772
   0   4  -5 9133.94  631.42   1 0.93016-0.95970-0.02816 0.28098-0.36606-0.00282
   0  -4  -5 7965.97  621.14   1 0.95247-0.98202-0.07953-0.17328-0.29403-0.07484
   0   4   5 8416.46  323.08   1 0.59598-0.56704-0.53906 0.79196 0.59514-0.22636
   0   4   5 6247.23  703.69   1-0.07992 0.10917 0.92997-0.67723-0.35882 0.72762
   0   4  -5 7988.27  432.08   1 0.63202-0.66114 0.75065-0.49789 0.19252-0.56123
   0   4   5 7165.49  407.89   1 0.60074-0.57164-0.53659 0.78935 0.59259-0.22392
   0   4  -624275.01 1099.22   1 0.92501-0.96046-0.01831 0.27112-0.37949-0.06317
   0  -4  -623153.83  870.73   1 0.93746-0.97292-0.04316-0.20965-0.34538-0.09728
   0   4   620903.19  778.83   1 0.65824-0.62298-0.52315 0.77598 0.54131-0.09868
   0   4  -623857.19  961.90   1 0.56628-0.60124 0.81457-0.56189 0.12567-0.56813
   0   4   623325.78  940.07   1 0.56549-0.53057-0.58309 0.83585 0.58328-0.14088
   0  -4  -734000.83 1295.97   1 0.92054-0.96190-0.01015-0.24265-0.39051-0.12592
   0   4  -741729.39 1681.03   1 0.49831-0.53910 0.86474-0.61207 0.06236-0.57855
   0   4   741236.56 1613.95   1 0.54372-0.50280-0.60954 0.86226 0.57690-0.06067
   0   4  -828616.75 1734.13   1 0.90789-0.95516 0.01124 0.24157-0.41904-0.17117
   0   4  -827906.60 1726.62   1 0.42991-0.47659 0.90287-0.65022 0.00171-0.59166
   0   4   830268.75 1735.23   1 0.53484-0.48808-0.61993 0.87265 0.57412 0.01584
   0   4   912346.17 1486.17   1-0.87931 0.93228-0.05489 0.30768 0.47305 0.19019
   0   4   911802.73 1465.07   1 0.92094-0.86898 0.34668-0.09371 0.17796 0.48588
   0   4  -910476.36 1735.59   1 0.35981-0.41233 0.93134-0.67869-0.05595-0.60773
   0   4   912090.29 1467.35   1 0.53674-0.48412-0.61774 0.87046 0.57472 0.08899
   0   4  1012742.92  994.60   1-0.85465 0.91350-0.08619 0.33898 0.51199 0.22494
   0  -4  1012039.77 1036.24   1-0.88262 0.94147-0.05041-0.20237 0.46737 0.26957
   0   4  1014336.29 1189.46   1 0.89504-0.83731 0.39378-0.14081 0.20933 0.52827
   0   4 -1013950.43 1744.12   1 0.28876-0.34711 0.95089-0.69825-0.11137-0.62605
   0  -4  11 5067.76 1055.65   1-0.86641 0.93115-0.07172-0.18106 0.49414 0.31649
   0   4  11 6557.29  936.12   1 0.86346-0.79995 0.44254-0.18957 0.24204 0.56932
   0   4 -11 4641.83 1183.71   1 0.21731-0.28168 0.96202-0.70929-0.16514-0.64618
   0  -4  12 4265.59  771.71   1-0.84779 0.91842-0.09429-0.15848 0.52186 0.36246
   0  -5   0    8.30  156.31   1 0.97158-0.97158-0.15801-0.15801-0.17620 0.17620
   0  -5   0  395.51  167.09   1-0.78695 0.78695-0.15799-0.15799 0.59643-0.59643
   0   5   0  424.14  131.40   1-0.97600 0.97600 0.15785 0.15785 0.15000-0.15000
   0   5   0  185.15  263.28   1 0.83511-0.83511 0.15794 0.15794 0.52691-0.52691
   0  -5   1116154.0 1900.82   1 0.97341-0.96748-0.18113-0.13489-0.14021 0.21395
   0  -5  -1121475.3 1783.85   1 0.96821-0.97413-0.13582-0.18020-0.21004 0.13630
   0  -5  -1121953.0 1754.96   1-0.53867 0.53282-0.33689 0.02082 0.77222-0.84596
   0  -5   1116137.9 1808.35   1-0.86894 0.87482-0.06850-0.24747 0.49014-0.41645
   0   5  -1108639.3 1673.57   1-0.96760 0.96170 0.18780 0.12789 0.16871-0.24239
   0   5  -1112197.4 1808.39   1 0.82793-0.83384 0.29364 0.02224 0.47779-0.55155
   0  -5  -2 -101.35   36.28   1 0.27881-0.29048-0.56520 0.24907 0.77640-0.92389
   0   5  -3 3800.42  289.75   1-0.86975 0.85214 0.39468-0.07890 0.29620-0.51731
   0   5  -3 3763.18  194.24   1 0.85056-0.86788 0.46041-0.14419 0.25409-0.47538
   0   5  -3 3540.13  324.39   1 0.76808-0.78570 0.53024-0.21439 0.35900-0.58026
   0   5   3 3400.23  314.45   1 0.76312-0.74549-0.22962 0.54567 0.60407-0.38271
   0   5  -485163.70 2688.00   1 0.91782-0.94145-0.00536 0.32138-0.39695 0.10184
   0   5   480466.44 2362.55   1-0.18062 0.20402-0.48738 0.80344 0.85429-0.55932
   0   5  -478775.35 2310.15   1-0.52172 0.49810 0.70529-0.38927 0.47995-0.77482
   0   5  -481669.18 2569.49   1 0.72202-0.74532 0.62560-0.30966 0.29545-0.59042
   0   5   484946.46 2609.12   1 0.72425-0.70075-0.32504 0.64109 0.60810-0.31295
   0   5  -5115331.4 3936.94   1 0.91727-0.94681-0.00440 0.32042-0.39823 0.02934
   0  -5  -5120455.8 3933.88   1 0.92511-0.95465-0.01849-0.29752-0.37924 0.01035
   0   5   5110598.2 3612.05   1 0.25708-0.22790-0.56430 0.88044 0.78451-0.41578
   0   5  -5106738.4 3608.70   1 0.66836-0.69748 0.70674-0.39080 0.23194-0.60065
   0   5   5107734.5 3615.20   1 0.68746-0.65836-0.39783 0.71378 0.60754-0.23887
   0   5  -6118295.8 3977.96   1 0.91337-0.94882 0.00223 0.31378-0.40711-0.03555
   0  -5  -6109257.5 3523.33   1 0.91046-0.94592 0.00706-0.32308-0.41352-0.02914
   0   5   6109731.6 3534.03   1 0.43462-0.39989-0.56256 0.87868 0.70329-0.26075
   0   5  -6109774.7 3673.84   1 0.61001-0.64497 0.77414-0.45829 0.16907-0.61152
   0   5   6107659.9 3564.46   1 0.65843-0.62350-0.44897 0.76492 0.60406-0.16166
   0   5  -713676.07 1471.25   1 0.90683-0.94820 0.01293 0.30308-0.42128-0.09516
   0   5  -713242.73 1451.19   1 0.54778-0.58857 0.82961-0.51377 0.10799-0.62419
   0   5   714927.38 1561.73   1 0.63831-0.59756-0.48139 0.79734 0.60067-0.08454
   0   5   825707.89 1604.61   1-0.87164 0.91873-0.06502 0.38100 0.48579 0.10375
   0   5  -827376.64 1771.34   1 0.48289-0.52951 0.87432-0.55848 0.04858-0.63852
   0   5   826344.70 1675.78   1 0.62750-0.58093-0.49795 0.81390 0.59856-0.00869
   0  -5   910051.91  810.17   1-0.88735 0.94032-0.04383-0.27214 0.45899 0.20425
   0   5   9 9367.13  807.81   1 0.92362-0.87166 0.34131-0.02510 0.17439 0.48945
   0   5  -9 8698.14 1070.98   1 0.41660-0.46912 0.90903-0.59323-0.00947-0.65421
   0   5   9 9320.79  676.19   1 0.62555-0.57317-0.50086 0.81681 0.59816 0.06543
   0  -5  10 5192.43 1254.91   1-0.87407 0.93292-0.06187-0.25411 0.48184 0.25510
   0   5  10 4968.69 1167.70   1 0.90028-0.84254 0.38487-0.06866 0.20338 0.53422
   0   5 -10 3514.14  973.27   1 0.34769-0.40604 0.93530-0.61950-0.06561-0.67181
   0  -5  1112357.72 1647.99   1-0.85851 0.92325-0.08152-0.23445 0.50627 0.30436
   0   5  1113078.85 1645.10   1 0.87185-0.80834 0.43033-0.11412 0.23383 0.57753
   0   5 -11 7343.36 1948.83   1 0.27689-0.34108 0.95333-0.63752-0.12036-0.69081
   0  -6   0152259.7 3670.32   1 0.97363-0.97363-0.18961-0.18961-0.12681 0.12681
   0  -6   0155077.6 3663.23   1-0.75176 0.75176-0.18956-0.18956 0.63160-0.63160
   0  -6   170271.61 2830.06   1 0.97350-0.96757-0.20233-0.17690-0.10652 0.18026
   0   6  -147524.11 2055.20   1-0.95769 0.95179 0.21821 0.16062 0.18763-0.26132
   0   6  -153202.41 1441.88   1 0.82691-0.83281 0.30193 0.07713 0.47438-0.54814
   0  -6  -2  117.45   45.15   1 0.07340-0.08499-0.54530 0.16605 0.83501-0.98244
   0  -6   3126326.9 3864.45   1-0.89350 0.91115-0.03502-0.34414 0.44768-0.22660
   0   6  -3141418.0 4589.21   1-0.87805 0.86044 0.38187-0.00293 0.28843-0.50954
   0   6  -3145546.3 4305.73   1 0.87136-0.88868 0.43106-0.05161 0.23432-0.45560
   0   6   3133206.4 4023.29   1 0.79474-0.77711-0.12852 0.50777 0.59317-0.37181
   0   6  -470339.50 2279.16   1 0.90033-0.92396 0.02309 0.35613-0.43459 0.13948
   0   6  -465879.36 1959.79   1-0.70787 0.68427 0.57737-0.19824 0.40687-0.70175
   0   6  -467668.81 2018.49   1 0.66878-0.69199 0.64007-0.26060 0.37819-0.67322
   0   6  -467676.22 2212.72   1 0.73797-0.76126 0.59625-0.21712 0.31603-0.61100
   0   6   467653.17 2137.42   1 0.76951-0.74600-0.21145 0.59071 0.60260-0.30746
   0   6  -5 4637.83  518.20   1 0.90187-0.93142 0.02071 0.35850-0.43149 0.06260
   0   6  -5 4089.74  409.89   1 0.69156-0.72068 0.67447-0.29534 0.25848-0.62720
   0   6   5 3753.89  411.50   1 0.74461-0.71523-0.27786 0.65711 0.60690-0.23797
   0   6   617621.75  664.09   1 0.02280 0.01195-0.53666 0.91591 0.84348-0.40119
   0   6   616954.34  648.20   1-0.82183 0.85714-0.12310 0.50227 0.55627-0.11410
   0   6  -617609.24  860.85   1 0.63949-0.67443 0.74220-0.36307 0.20043-0.64289
   0   6   617073.78  829.33   1 0.72316-0.68790-0.32744 0.70670 0.60812-0.16540
   0   6   741520.20 2234.75   1-0.82406 0.86525-0.12073 0.49990 0.55348-0.03762
   0  -6   744892.72 2589.17   1-0.89453 0.93573-0.03351-0.34566 0.44573 0.07012
   0   6  -747009.62 2664.68   1 0.58326-0.62405 0.79972-0.42071 0.14225-0.65844
   0   6   743189.76 2411.42   1 0.70714-0.66601-0.36106 0.74031 0.60793-0.09142
   0  -6   8 8097.62 1196.68   1-0.88653 0.93362-0.04498-0.33419 0.46046 0.12909
   0   6  -8 7173.67  998.85   1 0.52309-0.56971 0.84803-0.46901 0.08493-0.67487
   0   6   8 6987.87  897.22   1 0.69657-0.65001-0.38056 0.75970 0.60823-0.01836
   0  -6   9 7328.29  993.47   1-0.87619 0.92916-0.05907-0.32010 0.47832 0.18492
   0   6   9 7126.68 1047.32   1 0.92337-0.87141 0.34183 0.03762 0.17474 0.48910
   0   6  -9 9951.90 1273.88   1 0.45987-0.51232 0.88752-0.50851 0.02837-0.69205
   0   6   9 8766.70 1048.82   1 0.69366-0.64128-0.38615 0.76529 0.60803 0.05556
   0  -6  1030001.24 2362.82   1-0.86356 0.92241-0.07530-0.30387 0.49858 0.23835
   0   6  1028296.70 2178.69   1 0.90188-0.84415 0.38207-0.00262 0.20151 0.53609
   0   6 -1029627.20 2231.49   1 0.39468-0.45303 0.91840-0.53943-0.02766-0.70976
   0  -6  11 6705.28  984.95   1-0.84862 0.91336-0.09333-0.28584 0.52069 0.28993
   0   6  11 8002.62 1061.50   1 0.87580-0.81229 0.42442-0.04496 0.22986 0.58150
   0   6 -11 5573.49 1567.46   1 0.32620-0.39039 0.94168-0.56272-0.08252-0.72865
   0  -7   0  271.18  150.74   1 0.97226-0.97226-0.22122-0.22122-0.07592 0.07592
   0  -7   0   80.96  182.84   1-0.71336 0.71336-0.22115-0.22115 0.66498-0.66498
   0   7   0  532.09  316.66   1 0.83396-0.83396 0.22112 0.22112 0.50556-0.50556
   0  -7  -170540.92 2512.32   1 0.97121-0.97714-0.23022-0.21221-0.06112-0.01261
   0  -7  -170246.00 2116.59   1-0.51251 0.50666-0.35123-0.09125 0.78355-0.85729
   0  -7   169571.53 2176.44   1-0.80364 0.80953-0.14177-0.30060 0.57797-0.50428
   0   7  -161603.00 2010.26   1 0.82495-0.83085 0.31643 0.12581 0.46831-0.54207
   0   7   165616.76 2100.27   1 0.83431-0.82841 0.12669 0.31555 0.53652-0.46276
   0  -7  -288611.00 2618.93   1 0.96051-0.97231-0.27763-0.16477 0.01818-0.16568
   0  -7   297563.37 3014.21   1-0.84762 0.85939-0.09449-0.34787 0.52210-0.37471
   0   7  -286610.25 2628.66   1-0.92322 0.91148 0.30093 0.14116 0.23893-0.38634
   0   7  -285500.80 2695.22   1 0.80717-0.81891 0.40921 0.03297 0.42545-0.57296
   0   7   297131.92 3008.36   1 0.82703-0.81519 0.03665 0.40565 0.56095-0.41340
   0  -7   315826.04  798.10   1-0.86988 0.88754-0.06729-0.37507 0.48863-0.26755
   0   7  -315369.60 1014.50   1-0.87414 0.85653 0.38797 0.05412 0.29213-0.51324
   0   7  -319029.47  770.18   1 0.87413-0.89145 0.42692 0.01576 0.23154-0.45282
   0   7  -319113.76  858.53   1 0.78069-0.79831 0.49727-0.05508 0.37846-0.59971
   0   7   316918.36  774.95   1 0.81423-0.79647-0.04541 0.48772 0.57876-0.35743
   0   7  -413054.80  496.15   1-0.75465 0.73106 0.53398-0.09166 0.38124-0.67612
   0   7  -412638.08  486.94   1 0.73604-0.75925 0.58539-0.14267 0.33992-0.63495
   0   7  -414107.88  764.20   1 0.74649-0.76998 0.57878-0.13659 0.32826-0.62326
   0   7   415043.00  741.31   1 0.79826-0.77458-0.11673 0.55904 0.59089-0.29579
   0  -7   577877.96 2972.37   1-0.88447 0.91389-0.04786-0.39451 0.46413-0.09566
   0   7  -558700.56 2059.31   1-0.30891 0.27959 0.79303-0.35054 0.52503-0.89383
   0   7  -564794.29 2272.38   1 0.24385-0.27315 0.82143-0.37865 0.51553-0.88431
   0   7  -565165.83 2493.99   1 0.70610-0.73522 0.65218-0.20986 0.27579-0.64451
   0   7   565880.24 2487.51   1 0.78127-0.75189-0.17535 0.61781 0.59904-0.23011
   0  -7   6 8061.75 1007.59   1-0.88372 0.91903-0.04889-0.39348 0.46544-0.02327
   0   7  -6 3154.78  487.37   1 0.65951-0.69445 0.71812-0.27580 0.22211-0.66457
   0   7   6 3051.79  464.12   1 0.76631-0.73105-0.22066 0.66313 0.60338-0.16066
   0  -7   719855.42 1470.79   1-0.87954 0.92074-0.05459-0.38777 0.47267 0.04318
   0   7  -723275.91 1549.46   1 0.60836-0.64915 0.77580-0.33362 0.16739-0.68358
   0   7   723108.33 1497.56   1 0.75463-0.71350-0.25249 0.69496 0.60561-0.08910
   0   7  -832137.11 1704.12   1 0.55273-0.59935 0.82570-0.38351 0.11269-0.70262
   0   7   830250.17 1557.61   1 0.74731-0.70030-0.27119 0.71365 0.60661-0.01631
   0  -7   929449.30 2227.46   1-0.86298 0.91595-0.07602-0.36634 0.49947 0.16377
   0   7   934137.69 2486.00   1 0.92081-0.86885 0.34694 0.09575 0.17813 0.48571
   0   7  -934114.37 2409.20   1 0.49345-0.54589 0.86783-0.42565 0.05799-0.72167
   0  -7  10 5718.62 1155.26   1-0.85104 0.90989-0.09049-0.35188 0.51724 0.21970
   0   7  10 5306.99 1050.63   1 0.90072-0.84298 0.38411 0.05858 0.20287 0.53473
   0   7 -10 5632.93  947.27   1 0.43157-0.48992 0.90207-0.45994 0.00312-0.74055
   0  -8   032851.68 1246.18   1 0.96721-0.96721-0.25280-0.25280-0.02404 0.02404
   0  -8   039951.02 1414.55   1-0.67129 0.67129-0.25275-0.25275 0.69676-0.69676
   0   8   040533.40 1541.70   1 0.83197-0.83197 0.25271 0.25271 0.49390-0.49390
   0  -8  -120865.84 1150.47   1 0.96277-0.96867-0.27025-0.23534 0.00553-0.07927
   0  -8  -126083.94  933.38   1-0.47859 0.47274-0.36891-0.13678 0.79677-0.87051
   0  -8   123402.01  917.96   1-0.76623 0.77211-0.17707-0.32849 0.61768-0.54399
   0   8  -133633.91 1402.64   1 0.82213-0.82803 0.33491 0.17051 0.46035-0.53411
   0   8   129411.81 1173.30   1 0.83518-0.82927 0.17215 0.33327 0.52233-0.44857
   0  -8  -231694.53 1240.98   1 0.93884-0.95064-0.32744-0.17816 0.10654-0.25403
   0  -8  -235985.85 1211.77   1-0.05033 0.03875-0.52162 0.01595 0.85169-0.99912
   0  -8   235026.59 1327.91   1-0.81604 0.82781-0.12916-0.37640 0.56337-0.41598
   0   8  -235313.80 1297.62   1 0.92043-0.93197 0.34770 0.15823 0.17863-0.32615
   0   8  -238254.37 1459.71   1 0.80542-0.81716 0.41622 0.08913 0.42196-0.56946
   0   8   237301.03 1440.13   1 0.83256-0.82072 0.09566 0.40983 0.54560-0.39804
   0  -8   3111771.3 3753.81   1-0.84305 0.86071-0.09976-0.40580 0.52848-0.30740
   0   8  -3111463.1 3643.77   1 0.86865-0.88597 0.43505 0.07088 0.23700-0.45828
   0   8  -3116193.7 3909.58   1 0.78152-0.79914 0.49495 0.01041 0.37979-0.60105
   0   8   3111340.5 3728.89   1 0.82567-0.80791 0.02575 0.47973 0.56355-0.34222
   0  -8   482582.60 3096.00   1-0.85732 0.88086-0.08297-0.42259 0.50804-0.21326
   0   8  -469568.46 2491.70   1-0.76690 0.74330 0.52160-0.01610 0.37388-0.66875
   0   8  -480418.70 2880.16   1 0.75919-0.78240 0.56389-0.05792 0.32504-0.62007
   0   8  -487245.40 3287.88   1 0.75094-0.77444 0.56943-0.06407 0.33438-0.62939
   0   8   480258.87 2985.60   1 0.81608-0.79240-0.03553 0.54103 0.57683-0.28173
   0  -8   510388.50 1286.48   1-0.86377 0.89319-0.07504-0.43052 0.49826-0.12979
   0   8  -5 6584.68  668.26   1 0.47841-0.50761 0.74945-0.24339 0.45764-0.82649
   0   8  -510258.22 1180.78   1 0.71473-0.74385 0.63809-0.13258 0.28634-0.65506
   0   8   5 9470.73 1058.66   1 0.80553-0.77593-0.08670 0.59220 0.58616-0.21729
   0  -8   634285.31 2229.08   1-0.86493 0.90024-0.07358-0.43198 0.49646-0.05429
   0   8  -628225.52 1848.10   1 0.67254-0.70748 0.70120-0.19569 0.23663-0.67908
   0   8   627683.01 1783.89   1 0.79523-0.75997-0.12668 0.63235 0.59292-0.15019
   0  -8   716317.49 1180.74   1-0.86218 0.90338-0.07701-0.42855 0.50069 0.01516
   0   8  -713131.68  920.47   1 0.62540-0.66617 0.75790-0.25239 0.18558-0.70178
   0   8   712634.57  784.27   1 0.78731-0.74617-0.15522 0.66089 0.59669-0.08018
   0  -8   8  712.83  493.77   1-0.85628 0.90337-0.08422-0.42133 0.50958 0.07996
   0   8  -8 1792.20  601.11   1 0.57417-0.62079 0.80779-0.30244 0.13334-0.72328
   0   8   8 1641.27  468.66   1 0.78230-0.73529-0.17202 0.67769 0.59867-0.00837
   0   8   9 9386.47 1219.85   1 0.91632-0.86436 0.35569 0.15024 0.18394 0.47990
   0   8  -910762.29 1232.54   1 0.51862-0.57107 0.85117-0.34582 0.08082-0.74450
   0  -8  10 6019.80  978.26   1-0.83643 0.89529-0.10724-0.39832 0.53746 0.19947
   0   8  10 2277.69  681.43   1 0.89727-0.83954 0.39002 0.11591 0.20682 0.53078
   0   8 -10 3538.06  958.59   1 0.45937-0.51764 0.88780-0.38245 0.02793-0.76535
   0  -9   0  918.00  389.63   1-0.62524 0.62524-0.28434-0.28434 0.72678-0.72678
   0   9   0  534.09  442.34   1 0.82900-0.82900 0.28430 0.28430 0.48157-0.48157
   0  -9  -128144.54 1153.25   1 0.94851-0.95441-0.30841-0.26039 0.07217-0.14592
   0  -9  -135401.65 1323.36   1-0.43552 0.42967-0.38995-0.17896 0.81133-0.88507
   0  -9   134048.94 1368.89   1-0.72515 0.73104-0.21175-0.35693 0.65521-0.58152
   0   9  -144357.46 1836.50   1 0.81845-0.82435 0.35610 0.21250 0.45090-0.52466
   0   9   143332.83 1814.64   1 0.83426-0.82836 0.21457 0.35403 0.50790-0.43414
   0  -9  -257532.62 2049.39   1 0.90820-0.91995-0.37206-0.19660 0.19166-0.33915
   0  -9  -263465.09 2255.96   1-0.04261 0.03102-0.52335-0.04552 0.85104-0.99848
   0  -9   263513.66 2383.73   1-0.78101 0.79278-0.16357-0.40518 0.60271-0.45532
   0   9  -246477.60 1818.52   1 0.90708-0.91863 0.37286 0.19631 0.19537-0.34289
   0   9  -249270.80 2002.23   1 0.80233-0.81408 0.42802 0.14050 0.41599-0.56349
   0   9   248876.78 2028.12   1 0.83497-0.82316 0.14877 0.41982 0.52979-0.38227
   0  -9   325708.11 1462.97   1-0.81290 0.83056-0.13240-0.43635 0.56714-0.34606
   0   9  -322966.03 1260.87   1 0.85813-0.87545 0.45005 0.11913 0.24710-0.46838
   0   9  -322796.31 1329.25   1 0.78016-0.79778 0.49873 0.06979 0.37762-0.59888
   0   9   324155.09 1406.81   1 0.83206-0.81431 0.08860 0.48007 0.54755-0.32622
   0  -9   4 7465.37  863.06   1-0.83092 0.85446-0.11333-0.45543 0.54472-0.24994
   0   9  -411174.56  967.81   1 0.76359-0.78680 0.55962 0.00958 0.32209-0.61712
   0   9   4 9864.28  951.30   1 0.82692-0.80325 0.03576 0.53291 0.56116-0.26606
   0  -9   515609.87 1134.39   1-0.84018 0.86960-0.10303-0.46572 0.53242-0.16395
   0   9  -524616.26 1689.70   1 0.71912-0.74824 0.63063-0.06194 0.29181-0.66052
   0   9   521067.11 1426.55   1 0.82072-0.79112-0.00852 0.57720 0.57126-0.20238
   0  -9   6 6779.34  735.09   1-0.84346 0.87877-0.09930-0.46946 0.52792-0.08575
   0   9  -610928.72  886.12   1 0.68043-0.71537 0.69043-0.12173 0.24559-0.68805
   0   9   6 8655.05  605.58   1 0.81462-0.77910-0.04334 0.61202 0.57836-0.13571
   0  -9   7 9493.93 1034.69   1-0.84233 0.88353-0.10059-0.46817 0.52948-0.01362
   0   9  -7 9266.55  861.04   1 0.63690-0.67767 0.74517-0.17647 0.19767-0.71387
   0   9   7 7381.12 1406.46   1 0.80965-0.76821-0.06804 0.63672 0.58295-0.06652
   0  -9   826963.60 2175.50   1-0.83768 0.88476-0.10584-0.46291 0.53579 0.05375
   0   9   823895.37 1910.82   1 0.92503-0.87885 0.33845 0.23073 0.17249 0.41759
   0   9  -827811.45 2172.81   1 0.58921-0.63582 0.79428-0.22576 0.14813-0.73807
   0   9   825044.51 1894.68   1 0.80657-0.75921-0.08213 0.65082 0.58539 0.00480
   0  -9   927449.66 2490.84   1-0.83003 0.88299-0.11430-0.45446 0.54587 0.11737
   0   9   928517.98 2538.58   1 0.91008-0.85812 0.36739 0.20178 0.19173 0.47211
   0   9  -927497.55 2416.36   1 0.53703-0.58947 0.83786-0.26934 0.09787-0.76155
   0 -10   036130.81 1855.41   1-0.57477 0.57477-0.31594-0.31594 0.75486-0.75486
   0  10   035325.99 1935.33   1 0.82503-0.82503 0.31589 0.31589 0.46854-0.46854
   0 -10  -1 2056.55  269.00   1-0.38413 0.37828-0.41315-0.21896 0.82567-0.89941
   0 -10   1 2694.63  369.51   1-0.68046 0.68634-0.24611-0.38577 0.69021-0.61653
   0  10  -1 2069.06  448.02   1 0.91929-0.92506 0.34994 0.28248 0.18012-0.25388
   0  10  -1 3145.03  613.90   1 0.81403-0.81991 0.37912 0.25257 0.44000-0.51376
   0  10   1 3909.93  618.42   1 0.83180-0.82590 0.25489 0.37689 0.49308-0.41932
   0 -10  -233638.07 1805.98   1-0.00712-0.00445-0.53087-0.10121 0.84742-0.99485
   0 -10   239318.61 2236.03   1-0.74219 0.75396-0.19770-0.43417 0.64035-0.49297
   0  10  -233020.46 1919.67   1 0.89159-0.90313 0.39952 0.23289 0.21317-0.36069
   0  10  -231818.73 1914.86   1 0.79809-0.80983 0.44330 0.18839 0.40807-0.55558
   0  10   232147.69 1927.87   1 0.83483-0.82302 0.19766 0.43412 0.51379-0.36627
   0 -10   346802.44 2916.41   1-0.77927 0.79693-0.16518-0.46677 0.60451-0.38343
   0  10  -346944.50 2872.01   1 0.84387-0.86119 0.46927 0.16314 0.26009-0.48137
   0  10  -341152.51 2655.40   1 0.77710-0.79472 0.50708 0.12461 0.37278-0.59404
   0  10   347412.60 2987.59   1 0.83490-0.81719 0.14559 0.48619 0.53078-0.30950
   0 -10   422356.08 1391.20   1-0.80125 0.82479-0.14414-0.48781 0.58070-0.28592
   0  10  -419649.68 1091.13   1 0.75764-0.78085 0.56537 0.06707 0.32607-0.62109
   0  10  -420812.38 1293.12   1 0.75101-0.77450 0.56930 0.06239 0.33447-0.62948
   0  10   419144.37 1211.87   1 0.83283-0.80916 0.09980 0.53205 0.54444-0.24934
   0 -10   5 1302.02  577.00   1-0.81355 0.84297-0.13173-0.50022 0.56637-0.19789
   0  10  -5 1533.75  377.99   1 0.72033-0.74945 0.62854 0.00333 0.29333-0.66204
   0  10   5 1040.32  241.77   1 0.82975-0.80015 0.06159 0.57027 0.55472-0.18584
   0 -10   617434.55 1469.31   1-0.81916 0.85447-0.12591-0.50605 0.55956-0.11740
   0  10  -620493.61 1657.19   1 0.68440-0.71935 0.68483-0.05295 0.25016-0.69262
   0  10   616022.07 1293.69   1 0.82643-0.79091 0.03172 0.60014 0.56213-0.11948
   0 -10   718308.55 1625.45   1-0.81982 0.86102-0.12521-0.50674 0.55875-0.04288
   0  10  -718401.32 1597.03   1 0.64383-0.68460 0.73717-0.10528 0.20507-0.72127
   0  10   719126.71 1507.92   1 0.82365-0.78222 0.01092 0.62094 0.56697-0.05055
   0 -10   8 1489.38  523.21   1-0.81658 0.86366-0.12860-0.50335 0.56272 0.02683
   0  10   8 1780.39  707.61   1 0.91666-0.87048 0.35502 0.27739 0.18350 0.40658
   0  10  -8  230.01  363.39   1 0.59915-0.64576 0.78487-0.15318 0.15806-0.74800
   0 -10   9 8009.43 1103.06   1-0.81003 0.86300-0.13533-0.49662 0.57055 0.09269
   0  10   9 7778.57 1123.98   1 0.90221-0.85025 0.38150 0.25091 0.20113 0.46271
   0  10  -9 8040.02 1052.67   1 0.54993-0.60237 0.82792-0.19623 0.11003-0.77371
   0 -11   0 1025.09  314.10   1-0.51913 0.51913-0.34766-0.34766 0.78078-0.78078
   0  11   0 1769.00  640.50   1 0.92036-0.92036 0.34783 0.34783 0.17872-0.17872
   0  11   0 1268.60  568.82   1 0.82001-0.82001 0.34748 0.34748 0.45479-0.45479
   0 -11   115336.23  910.62   1-0.63157 0.63746-0.28017-0.41489 0.72292-0.64923
   0  11  -117002.28 1067.56   1 0.90278-0.90855 0.38051 0.31515 0.20047-0.27423
   0  11  -117796.22 1225.48   1 0.80851-0.81439 0.40365 0.29121 0.42820-0.50195
   0  11   115411.25 1117.56   1 0.82793-0.82203 0.29368 0.40128 0.47778-0.40402
   0 -11   232702.00 1811.19   1-0.69961 0.71138-0.23179-0.46327 0.67587-0.52849
   0  11  -237697.23 2042.96   1 0.87394-0.88549 0.42721 0.26844 0.23173-0.37926
   0  11  -239923.55 2253.61   1 0.79274-0.80449 0.46119 0.23367 0.39855-0.54605
   0  11   240052.16 2308.19   1 0.83265-0.82085 0.24352 0.45144 0.49737-0.34985
   0 -11   3  319.27  314.95   1-0.74185 0.75951-0.19799-0.49707 0.64066-0.41959
   0  11  -3  389.91  297.00   1 0.82643-0.84374 0.49129 0.20436 0.27502-0.49630
   0  11  -3  479.50  376.43   1 0.77258-0.79020 0.51894 0.17592 0.36579-0.58705
   0  11   3  641.43  356.37   1 0.83481-0.81711 0.19812 0.49684 0.51363-0.29235
   0 -11   418520.50 1630.76   1-0.76813 0.79167-0.17536-0.51979 0.61580-0.32102
   0  11   417573.77 1519.22   1 0.83511-0.81151 0.15852 0.53643 0.52672-0.23168
   0 -11   533407.91 2508.68   1-0.78370 0.81313-0.16105-0.53410 0.59988-0.23141
   0  11  -536764.92 2719.08   1 0.71903-0.74815 0.63080 0.06427 0.29169-0.66040
   0  11   536466.78 2667.30   1 0.83418-0.80458 0.12551 0.56953 0.53701-0.16813
   0 -11   619552.02 1683.70   1-0.79185 0.82716-0.15331-0.54184 0.59115-0.14898
   0  11  -615486.06 1325.22   1 0.68528-0.72023 0.68358 0.01148 0.25118-0.69363
   0 -11   7 3929.14  821.20   1-0.79449 0.83569-0.15075-0.54439 0.58825-0.07239
   0  11   7 2144.40  671.43   1 0.91803-0.87762 0.35239 0.34327 0.18175 0.33457
   0  11  -7 3873.16  833.95   1 0.64712-0.68788 0.73329-0.03821 0.20861-0.72480
   0  11   7 5081.46 1002.59   1 0.83164-0.79021 0.08308 0.61196 0.54905-0.03262
   0 -11   8 5488.21  986.17   1-0.79280 0.83988-0.15239-0.54275 0.59011-0.00055
   0  11   8 4395.55  837.95   1 0.90678-0.86059 0.37340 0.32226 0.19573 0.39435
   0  11  -8 7603.91 1205.83   1 0.60496-0.65158 0.77919-0.08433 0.16393-0.75387
   0  12   031468.48 2604.70   1 0.90338-0.90338 0.37945 0.37945 0.19976-0.19976
   0  12   033894.15 2836.73   1 0.81405-0.81405 0.37902 0.37902 0.44005-0.44005
   0 -12   123986.43 1952.83   1-0.57797 0.58386-0.31401-0.44423 0.75321-0.67952
   0  12  -119270.67 1655.63   1 0.88430-0.89007 0.41127 0.34763 0.22103-0.29480
   0  12   118108.77 1593.30   1 0.91507-0.90930 0.35806 0.40084 0.18552-0.11176
   0  12  -123326.59 2021.27   1 0.80200-0.80787 0.42925 0.32878 0.41536-0.48911
   0  12   119664.50 1691.64   1 0.82271-0.81680 0.33134 0.42680 0.46191-0.38815
   0 -12   2 8720.54 1879.23   1-0.65278 0.66455-0.26579-0.49245 0.70937-0.56200
   0  12  -211756.80 1032.43   1 0.85407-0.86562 0.45564 0.30326 0.25088-0.39840
   0  12   211394.60 1050.07   1 0.92157-0.91003 0.34542 0.41348 0.17712-0.02960
   0  12  -211885.04 1097.02   1 0.78632-0.79806 0.48107 0.27696 0.38763-0.53513
   0  12   211138.58 1046.12   1 0.82869-0.81689 0.28713 0.47101 0.48043-0.33291
   0 -12   3 7743.34  740.97   1-0.70060 0.71825-0.23104-0.52720 0.67510-0.45404
   0  12  -3 9554.66  827.21   1 0.80600-0.82332 0.51525 0.24365 0.29133-0.51261
   0  12   3 8699.31  904.78   1 0.92418-0.90686 0.34018 0.41872 0.17365 0.04763
   0  12  -311197.41 1012.96   1 0.76673-0.78435 0.53353 0.22450 0.35700-0.57825
   0  12   3 9689.84  901.64   1 0.83238-0.81467 0.24738 0.51075 0.49592-0.27464
   0 -12   4 4910.97  895.21   1-0.73124 0.75478-0.20680-0.55144 0.65001-0.35525
   0  12   4 3867.70  796.73   1 0.92365-0.90056 0.34126 0.41764 0.17436 0.12067
   0  12  -4 3882.45  854.36   1 0.74307-0.76656 0.58575 0.17228 0.32362-0.61862
   0  12   4 4916.00  972.11   1 0.83432-0.81072 0.21299 0.54514 0.50845-0.21341
   0 -12   5 1277.27  537.13   1-0.75033 0.77976-0.19078-0.56746 0.63292-0.26448
   0  12   5 1422.37  686.84   1 0.92039-0.89152 0.34777 0.41113 0.17868 0.19012
   0  12  -5 2786.92  685.00   1 0.71562-0.74474 0.63659 0.12166 0.28745-0.65616
   0  12   5  717.21  381.23   1 0.83508-0.80557 0.18478 0.57335 0.51816-0.14936
   0 -12   6 4575.91  982.35   1-0.76133 0.79664-0.18142-0.57692 0.62245-0.18029
   0  12   6 6233.65  888.02   1 0.91459-0.87995 0.35899 0.39991 0.18614 0.25642
   0  12  -6 4285.01  886.20   1 0.68361-0.71855 0.68596 0.07229 0.24924-0.69170
   0  12   6 5040.65  996.88   1 0.83516-0.79975 0.16352 0.59462 0.52513-0.08257
   0 -12   7 6471.98  954.85   1-0.76615 0.80734-0.17714-0.58120 0.61776-0.10190
   0  12   7 9894.51 1538.27   1 0.90627-0.86585 0.37432 0.38458 0.19634 0.31997
   0  12  -7 7239.37 1044.69   1 0.64739-0.68816 0.73296 0.02530 0.20891-0.72510
   0  13   0   23.38  339.92   1 0.88442-0.88442 0.41107 0.41107 0.22090-0.22090
   0  13   0 1100.11  590.07   1 0.80682-0.80682 0.41060 0.41060 0.42477-0.42477
   0  13  -110088.71  932.78   1 0.86372-0.86950 0.44216 0.37998 0.24179-0.31555
   0  13   110099.08 1101.15   1 0.89754-0.89176 0.38957 0.43257 0.20652-0.13276
   0  13  -111521.08 1144.14   1 0.79444-0.80031 0.45567 0.36553 0.40152-0.47527
   0  13   111081.41 1092.26   1 0.81614-0.81024 0.36813 0.45319 0.44539-0.37163
   0 -13   220290.36 2024.81   1-0.60122 0.61299-0.29974-0.52169 0.74072-0.59335
   0  13  -220025.26 2028.81   1 0.83186-0.84340 0.48460 0.33754 0.27048-0.41800
   0  13   220783.01 2193.42   1 0.90521-0.89366 0.37622 0.44593 0.19761-0.05008
   0  13  -220728.66 2157.56   1 0.77879-0.79054 0.50251 0.31869 0.37544-0.52294
   0  13   223613.96 2400.44   1 0.82307-0.81127 0.32902 0.49230 0.46291-0.31539
   0 -13   3 1093.73  390.96   1-0.65504 0.67269-0.26423-0.55721 0.70788-0.48681
   0  13   3 1190.91  398.18   1 0.90874-0.89142 0.36984 0.45230 0.19336 0.02791
   0  13  -3 2820.52  806.50   1 0.75962-0.77724 0.55028 0.27092 0.34662-0.56788
   0  13   3 2871.60  660.29   1 0.82787-0.81017 0.29414 0.52718 0.47759-0.25631
   0 -13   4 3393.99  720.98   1-0.69046 0.71400-0.23870-0.58273 0.68284-0.38808
   0  13   4 2633.92  776.62   1 0.90893-0.88584 0.36950 0.45265 0.19313 0.10190
   0  13  -4 2246.20  628.17   1 0.73707-0.76037 0.59798 0.22347 0.31485-0.60982
   0  13   4 1856.77  478.73   1 0.83100-0.80739 0.26427 0.55704 0.48947-0.19443
   0 -13   5 9248.23 1189.83   1-0.71335 0.74277-0.22116-0.60028 0.66499-0.29654
   0  13   5 8253.71 1265.22   1 0.90623-0.87737 0.37438 0.44776 0.19638 0.17241
   0  13   5 6411.43  922.57   1 0.83288-0.80337 0.24017 0.58114 0.49861-0.12981
   0  14   020098.33 1793.35   1 0.86335-0.86335 0.44269 0.44269 0.24215-0.24215
   0  14   018373.88 1740.30   1 0.79841-0.79841 0.44219 0.44219 0.40866-0.40866
   0  14   1 4779.60 1092.47   1 0.87798-0.87221 0.42110 0.46429 0.22763-0.15386
   0  14  -1 3822.09  792.60   1 0.84089-0.84666 0.47315 0.41223 0.26272-0.33648
   0  14  -1 3714.01  799.85   1 0.78575-0.79163 0.48275 0.40162 0.38669-0.46045
   0  14   1 2923.76  696.57   1 0.80838-0.80250 0.40423 0.48014 0.42792-0.35416
   0  14   2 6194.80 1095.63   1 0.88690-0.87536 0.40712 0.47826 0.21826-0.07074
   0  14  -2 6130.78  916.88   1 0.77012-0.78186 0.52518 0.35919 0.36206-0.50956
   0  14   2 4541.43  714.75   1 0.81599-0.80424 0.36960 0.51478 0.44446-0.29696
   0  14   3 9325.56 1280.88   1 0.89144-0.87412 0.39976 0.48563 0.21333 0.00794
   0  14  -310384.27 1346.85   1 0.75126-0.76887 0.56877 0.31560 0.33481-0.55607
   0  14   310070.31 1296.53   1 0.82147-0.80377 0.33893 0.54556 0.45858-0.23730
   1   0 -12 6250.42  697.00   1 0.90644-0.88613 0.01355-0.01355-0.42209-0.46323
   1   0 -11 1399.12  535.85   1 0.92627-0.90005-0.02068 0.02068-0.37626-0.43528
   1   0 -10 1562.86  331.78   1 0.94287-0.91074-0.05523 0.05523-0.32852-0.40925
   1   0 -10 1222.52  227.82   1-0.10632 0.13906 0.92121-0.92121-0.37424-0.36334
   1   0  -914827.00 2114.98   1 0.95622-0.91818-0.09044 0.09044-0.27830-0.38569
  -1   0   915090.36 1283.70   1 0.67883-0.71779 0.63255-0.63255 0.37289 0.29092
   1   0  -915119.24 1330.10   1-0.04081 0.07940 0.94118-0.94118-0.33541-0.32842
   1   0  -8111888.8 4361.89   1 0.96623-0.92235-0.12604 0.12604-0.22473-0.36519
  -1   0   8109855.0 3954.61   1 0.71752-0.76228 0.60153-0.60153 0.35116 0.23889
   1   0  -8110194.7 3942.55   1 0.02437 0.02006 0.95522-0.95522-0.29487-0.29519
   1   0  -797520.37 3331.30   1 0.97224-0.92244-0.16417 0.16417-0.16669-0.34949
  -1   0   781127.19 2710.28   1-0.96847 0.91873 0.18493-0.18493 0.16692 0.34890
  -1   0   797302.39 3272.02   1 0.74594-0.79651 0.57638-0.57638 0.33368 0.18261
   1   0  -793207.49 3119.46   1 0.09281-0.04256 0.96338-0.96338-0.25156-0.26473
  -1   0   787319.87 2918.35   1 0.75027-0.80041 0.57088-0.57088 0.33344 0.18281
   1   0  -6 8808.45 1092.74   1 0.97340-0.91767-0.20507 0.20507-0.10212-0.34032
  -1   0   6 5742.90  490.94   1-0.99242 0.93681 0.07139-0.07139 0.09998 0.34244
  -1   0   6 7527.86  427.81   1 0.76356-0.81992 0.55965-0.55965 0.32211 0.12042
   1   0  -6 7428.71  669.40   1 0.16225-0.10615 0.96537-0.96537-0.20426-0.23828
  -1   0   6 6803.79  317.61   1 0.73915-0.79517 0.59353-0.59353 0.31837 0.12412
   1   0  -5349950.3 8271.27   1 0.96767-0.90598-0.25066 0.25066-0.02763-0.34110
  -1   0   5338061.8 7858.18   1-0.99844 0.93691-0.05080 0.05080 0.02286 0.34583
  -1   0   5351424.0 8183.79   1 0.76800-0.83017 0.55528-0.55528 0.31910 0.04968
   1   0  -5360184.3 8369.52   1 0.23881-0.17686 0.95949-0.95949-0.14948-0.21930
  -1   0   5344721.3 8003.33   1 0.73606-0.79814 0.59993-0.59993 0.31351 0.05519
   1   0  -4274263.4 3951.07   1 0.95091-0.88332-0.30305 0.30305 0.06264-0.35763
  -1   0   4277896.9 3949.11   1 0.75332-0.82130 0.56948-0.56948 0.32890-0.03388
   1   0  -4283522.0 3991.37   1 0.33034-0.26248 0.94052-0.94052-0.07929-0.21567
  -1   0   4276182.5 3873.15   1 0.74517-0.81294 0.58148-0.58148 0.32647-0.03146
  -1   0   389671.31 1381.51   1 0.79632-0.86985-0.46444 0.46444 0.38749-0.16625
  -1   0   394107.40 1429.89   1 0.70548-0.77926 0.61156-0.61156 0.35816-0.13688
   1   0  -390482.10 1346.28   1 0.91705-0.84322 0.35428-0.35428 0.18300-0.40429
   1   0  -395611.75 1379.61   1 0.46358-0.38985 0.88548-0.88548 0.03160-0.25283
  -1   0   394502.98 1358.65   1 0.78401-0.85765 0.48784-0.48784 0.38383-0.16258
  -1   0   2236571.3 3343.46   1 0.71811-0.79754-0.50220 0.50220 0.48176-0.33422
  -1   0   2244583.8 3444.87   1 0.59238-0.67192 0.69080-0.69080 0.41456-0.26702
   1   0  -2237039.9 3334.80   1 0.76801-0.68843 0.55527-0.55527 0.31909-0.46661
  -1   0   2242596.2 3346.30   1 0.83300-0.91245 0.10238-0.10238 0.54371-0.39616
  -1   0   165349.97  970.69   1 0.49932-0.58472-0.55600 0.55600 0.66447-0.59072
  -1   0   162770.98  937.69   1 0.35187-0.43724 0.79534-0.79534 0.49357-0.41981
   1   0   1  566.88  167.21   1-0.51735 0.61439-0.34862 0.34862 0.78153-0.70779
   1   0   1  145.82   88.68   1-0.32107 0.41814 0.78936-0.78936 0.52326-0.44950
  -1   0  -1  353.41   75.30   1 0.10727-0.20432 0.96435-0.96435-0.24189 0.16813
   1   0   1  278.00   67.25   1 0.20745-0.11040 0.96295-0.96295-0.17225 0.24601
   1   0   2516285.1 7169.18   1-0.74984 0.85278-0.19120 0.19120 0.63337-0.48599
  -1   0  -2539277.1 7462.00   1-0.72617 0.62324 0.56109-0.56109 0.39729-0.54473
   1   0   2517681.7 7240.66   1 0.30216-0.19929 0.94787-0.94787-0.10113 0.24862
   1   0   3495901.8 6915.89   1 0.94337-0.83442-0.05639 0.05639-0.32689 0.54823
  -1   0  -3515422.4 7170.31   1-0.87395 0.76526 0.38827-0.38827 0.29231-0.51342
   1   0   3507950.5 7061.37   1-0.62434 0.73316 0.64229-0.64229 0.44457-0.22341
   1   0   444014.73  816.69   1 0.96849-0.85349-0.13737 0.13737-0.20769 0.50266
   1   0   441935.76  839.28   1-0.85986 0.97454-0.07987 0.07987 0.50423-0.20945
  -1   0  -442763.62  850.22   1-0.95043 0.83579 0.23810-0.23810 0.19996-0.49472
   1   0   443338.97  761.25   1-0.66367 0.77840 0.61349-0.61349 0.42796-0.13308
  -1   0  -446155.02  910.78   1 0.13580-0.25042 0.96541-0.96541-0.22253-0.07249
   1   0   445521.15  893.46   1 0.43077-0.31623 0.90245-0.90245 0.00245 0.29252
   1   0   551135.92 1409.53   1-0.86990 0.99047-0.06727 0.06727 0.48861-0.12013
  -1   0  -548265.45 1289.90   1-0.98697 0.86643 0.10833-0.10833 0.11894-0.48739
   1   0   549707.32 1268.44   1-0.67232 0.79294 0.60676-0.60676 0.42405-0.05545
  -1   0  -552134.97 1489.87   1 0.11006-0.23052 0.96450-0.96450-0.24001-0.12876
   1   0   613364.25  681.95   1-0.87025 0.99670-0.06683 0.06683 0.48805-0.04588
  -1   0  -613413.37 1166.84   1-0.99882 0.87212-0.01331 0.01331 0.04666-0.48909
   1   0   611544.04  446.21   1-0.66213 0.78865 0.61468-0.61468 0.42865 0.01366
  -1   0  -613969.90  598.29   1 0.07779-0.20411 0.96206-0.96206-0.26150-0.18104
   1   0   7 1364.05  299.78   1-0.86474 0.99708-0.07382 0.07382 0.49675 0.01910
   1   0   7 1305.44  191.12   1-0.63843 0.77085 0.63231-0.63231 0.43883 0.07719
  -1   0  -7 1689.13  235.92   1 0.04085-0.17302 0.95749-0.95749-0.28552-0.23077
   1   0   840590.03 2152.24   1-0.85502 0.99325-0.08575 0.08575 0.51145 0.07810
  -1   0  -842846.58 2218.43   1-0.00107-0.13694 0.95043-0.95043-0.31092-0.27914
   1   0   941327.42 2621.71   1-0.84181 0.98592-0.10118 0.10118 0.53019 0.13305
  -1   0  -946993.86 2898.26   1-0.04476-0.09911 0.94015-0.94015-0.33780-0.32602
   1   0  10 1652.55  506.68   1-0.82543 0.97543-0.11926 0.11926 0.55174 0.18519
  -1   0 -10 1314.06  360.66   1-0.09123-0.05848 0.92634-0.92634-0.36547-0.37211
   1   0  11 5055.69  974.60   1-0.80597 0.96185-0.13944 0.13944 0.57529 0.23534
  -1   0 -11 3466.34  694.35   1-0.14039-0.01518 0.90846-0.90846-0.39367-0.41767
   1   0  1219714.83 2325.07   1-0.78335 0.94512-0.16138 0.16138 0.60025 0.28407
   1   1 -1212913.60 1257.79   1 0.90585-0.88554 0.01449 0.04870-0.42333-0.46200
   1  -1 -1212618.41 1200.41   1 0.90479-0.88447 0.01618-0.07938-0.42554-0.45978
   1  -1 -1110124.65  924.68   1 0.92592-0.89969-0.02001-0.04319-0.37718-0.43437
   1   1 -1110966.29 1044.83   1 0.92474-0.89852-0.01781 0.08101-0.38016-0.43138
   1  -1 -1064603.19 3166.98   1 0.94354-0.91141-0.05679-0.00640-0.32633-0.41144
   1   1 -1054331.96 2708.71   1 0.94065-0.90852-0.05016 0.11337-0.33562-0.40215
  -1   1  1053851.29 2611.30   1 0.71503-0.74819 0.60364-0.54039 0.35262 0.38494
   1   1 -1053774.97 2580.63   1 0.03395-0.00121 0.95679-0.89361-0.28875-0.44883
   1   1  -932000.92 3526.95   1 0.95363-0.91559-0.08280 0.14600-0.28934-0.37465
   1  -1  -949661.47 3073.62   1 0.95756-0.91952-0.09462 0.03142-0.27222-0.39177
  -1  -1   946176.26 2795.48   1 0.53914-0.57781 0.72048-0.78373 0.43614 0.22777
  -1   1   934829.81 2184.44   1 0.75691-0.79587 0.56608-0.50283 0.32655 0.33726
   1   1  -933786.43 2148.27   1 0.11362-0.07508 0.96469-0.90150-0.23761-0.42620
   1   1  -829376.20 2573.34   1 0.96373-0.91985-0.11534 0.17855-0.24066-0.34926
   1  -1  -829686.84 1259.25   1 0.96774-0.92387-0.13338 0.07018-0.21371-0.37621
  -1  -1   822712.95  953.51   1-0.89579 0.85168 0.35260-0.41576 0.27060 0.31902
  -1  -1   828338.84 1119.18   1 0.58258-0.62708 0.69659-0.75985 0.41874 0.17140
  -1   1   825485.58 1141.10   1 0.79010-0.83507 0.53269-0.46945 0.30325 0.28682
   1   1  -824816.46 1052.91   1 0.19341-0.14902 0.96403-0.90084-0.18230-0.40775
  -1   1   821185.95  842.85   1 0.71411-0.75872 0.63912-0.57593 0.28558 0.30435
   1   1  -746709.55 1975.78   1 0.97049-0.92069-0.14964 0.21284-0.18905-0.32713
   1  -1  -739207.86 1482.00   1 0.97313-0.92332-0.17555 0.11234-0.14897-0.36720
  -1  -1   732693.52 1156.23   1-0.94901 0.89927 0.24180-0.30494 0.20226 0.31356
  -1  -1   734403.03 1226.48   1 0.60810-0.65867 0.68127-0.74452 0.40751 0.10878
  -1   1   750742.16 1849.51   1 0.81647-0.86720 0.50320-0.43996 0.28312 0.23320
   1  -1  -736327.44 1280.56   1-0.13195 0.18224 0.91177-0.97496-0.38890-0.12740
   1   1  -748991.77 1841.21   1 0.27630-0.22595 0.95344-0.89028-0.12081-0.39539
  -1   1   745891.59 1574.91   1 0.68134-0.73177 0.68915-0.62597 0.24663 0.26955
   1  -1  -682091.56 2565.89   1 0.97221-0.91648-0.22171 0.15850-0.07511-0.36732
   1   1  -695586.71 2972.06   1 0.97355-0.91782-0.18562 0.24883-0.13313-0.30930
  -1  -1   673074.75 2198.19   1-0.98640 0.93076 0.11135-0.17449 0.12084 0.32128
  -1  -1   678922.05 2383.23   1 0.61487-0.67123 0.67701-0.74026 0.40445 0.03809
  -1   1   691251.00 2813.25   1 0.83541-0.89191 0.48015-0.41691 0.26746 0.17510
   1  -1  -680783.85 2438.26   1-0.10656 0.16270 0.92113-0.98431-0.37438-0.06817
   1   1  -689608.89 2718.67   1 0.36711-0.31092 0.92882-0.86566-0.05009-0.39236
  -1   1   687537.70 2624.84   1 0.64489-0.70115 0.73592-0.67273 0.20621 0.23624
  -1  -1   677004.99 2340.12   1 0.79127-0.84729 0.46591-0.52908 0.39599 0.04650
   1   1  -531121.29 1155.51   1 0.97193-0.91028-0.22432 0.28752-0.07084-0.29785
   1  -1  -519623.99  652.78   1 0.96146-0.89977-0.27460 0.21140 0.01298-0.38171
  -1  -1   521000.94  609.99   1 0.59523-0.65725 0.68909-0.75235 0.41333-0.04448
  -1  -1   520671.54  609.92   1 0.79666-0.85855 0.44822-0.51139 0.40548-0.03673
   1   1  -426941.90  613.18   1 0.96346-0.89587-0.26782 0.33102 0.00137-0.29635
   1  -1  -432429.82  747.96   1 0.93331-0.86572-0.33696 0.27376 0.12403-0.41902
  -1  -1   432718.86  694.65   1 0.86910-0.93676-0.41246 0.34927 0.27298 0.02199
  -1   1   428788.38  594.16   1 0.75551-0.82319-0.48588 0.54909 0.43943-0.14434
  -1  -1   431336.07  568.49   1 0.53025-0.59811 0.72503-0.78829 0.43949-0.14441
  -1   1   430287.82  679.54   1 0.84664-0.91470 0.46563-0.40239 0.25762 0.03741
   1  -1  -433881.28  566.13   1-0.12905 0.19689 0.91289-0.97607-0.38726 0.09222
  -1   1   427607.65  481.68   1 0.55235-0.62025 0.82600-0.76284 0.11232 0.18264
   1   1  -426593.80  514.90   1 0.58454-0.51664 0.79856-0.73539 0.14351-0.43848
  -1  -1   432009.68  586.34   1 0.81069-0.87846 0.39436-0.45753 0.43272-0.13772
   1   1  -3269370.7 3866.77   1 0.94354-0.87005-0.31863 0.38183 0.09054-0.31178
  -1  -1   3241784.2 3483.97   1 0.85644-0.92996-0.42321 0.36003 0.29562-0.07438
   1  -1  -3252063.9 3583.43   1 0.86817-0.79464-0.41328 0.35010 0.27470-0.49594
  -1   1   3255478.9 3618.37   1 0.69258-0.76614-0.51184 0.57504 0.50827-0.28696
  -1  -1   3244705.4 3430.01   1 0.38590-0.45960 0.78487-0.84812 0.48482-0.26351
   1   1  -3261165.3 3641.29   1 0.81507-0.74125 0.50483-0.44159 0.28422-0.50551
  -1   1   3257451.9 3564.09   1 0.46878-0.54251 0.88257-0.81940 0.03614 0.18508
   1   1  -3269440.9 3778.76   1 0.71631-0.64258 0.63543-0.57224 0.28830-0.50953
  -1  -1   3237114.3 3335.95   1 0.83016-0.90376 0.27316-0.33634 0.48600-0.26472
   1   1  -2148822.7 2181.20   1 0.89943-0.82003-0.38230 0.44549 0.21178-0.35927
  -1  -1   2126003.9 1806.79   1 0.12003-0.19951 0.83789-0.90111 0.53247-0.38494
   1   1  -2141075.2 1999.30   1 0.45949-0.37996 0.75750-0.69425 0.46372-0.61126
  -1   1   2146917.2 2183.50   1 0.78825-0.86783 0.53453-0.47128 0.30484-0.15732
   1   1  -2142342.9 2026.65   1 0.82551-0.74601 0.31247-0.24930 0.46998-0.61750
  -1   1   2145050.8 1996.88   1 0.79285-0.87239-0.13554 0.19875 0.59414-0.44657
   1   1  -1262835.9 3679.84   1 0.78889-0.70361-0.46867 0.53185 0.39747-0.47122
  -1   1   1260135.4 3624.28   1 0.18567-0.27105-0.55929 0.62252 0.80790-0.73415
  -1  -1   1257325.8 3583.47   1-0.23801 0.15268 0.81161-0.87482 0.53351-0.45975
  -1   1   1258443.0 3632.48   1 0.68566-0.77104 0.62733-0.56408 0.36921-0.29546
   1  -1  -1257961.1 3551.80   1 0.78761-0.70222 0.47720-0.54037 0.38978-0.46354
   1   1  -1263830.1 3667.66   1 0.77113-0.68571-0.20669 0.26990 0.60218-0.67597
  -1  -1   1264664.0 3681.33   1 0.70178-0.78715-0.37039 0.30720 0.60853-0.53479
  -1  -1   0263057.7 3646.66   1 0.32487-0.41609-0.56610 0.50288 0.75761-0.75761
  -1   1   0302242.0 4194.67   1-0.36076 0.26957-0.42306 0.48628 0.83118-0.83118
  -1   1   0285554.3 3977.90   1 0.45817-0.54938 0.75805-0.69480 0.46414-0.46414
   1  -1   0257388.3 3590.92   1 0.55962-0.46841 0.70957-0.77282 0.42816-0.42816
  -1   1   0299467.7 4161.98   1 0.52090-0.61211 0.84958-0.78641 0.08291-0.08291
  -1  -1   0265743.6 3701.89   1 0.43354-0.52475-0.72329 0.66011 0.53748-0.53748
   1   1   1129680.2 1831.48   1-0.24449 0.34154-0.46693 0.53015 0.84981-0.77607
  -1  -1  -1125996.0 1775.87   1-0.46133 0.36429-0.37752 0.31431 0.80289-0.87663
   1  -1   1128291.4 1855.37   1-0.63297 0.73002-0.27924 0.21605 0.72205-0.64836
   1   1   1136333.1 1972.98   1-0.64383 0.74086 0.62839-0.56520 0.43657-0.36285
   1  -1   1128919.6 1836.40   1 0.24068-0.14359 0.82203-0.88528 0.51607-0.44231
  -1   1  -1132863.4 1934.74   1 0.45948-0.55652 0.88774-0.82457 0.02803-0.10177
   1   1   2105244.7 1552.17   1-0.66793 0.77087-0.25515 0.31834 0.69910-0.55173
   1  -1   291673.42 1469.00   1-0.78302 0.88594-0.16169 0.09849 0.60060-0.45321
  -1  -1  -293512.00 1439.88   1-0.15484 0.05190 0.90256-0.96574-0.40174 0.25423
   1   1   2104215.6 1587.73   1 0.01863 0.08429 0.95422-0.89103-0.29851 0.44603
  -1   1  -2105114.0 1612.20   1 0.40791-0.51078 0.91286-0.84970-0.01672-0.13075
   1  -1   289179.63 1384.31   1 0.54191-0.43904 0.83416-0.89733 0.10245 0.04502
   1   1   372360.17 1157.42   1 0.95093-0.84198-0.07531 0.13851-0.30008 0.52142
   1  -1   380600.59 1320.72   1 0.94176-0.83281-0.05267-0.01053-0.33212 0.55345
   1   1   369998.99 1099.43   1-0.80038 0.90918-0.14500 0.20819 0.58168-0.36060
   1  -1   380474.75 1314.58   1-0.84112 0.94992-0.10196 0.03877 0.53113-0.31005
  -1  -1  -384477.87 1337.72   1-0.93029 0.82156 0.28605-0.34920 0.22959-0.45065
  -1   1  -375286.54 1129.25   1-0.75929 0.65047 0.52935-0.46616 0.37849-0.59964
   1   1   372139.65 1173.40   1-0.76630 0.87512 0.52222-0.45903 0.37424-0.15309
  -1  -1  -383454.36 1347.73   1-0.09174-0.01703 0.92617-0.98935-0.36576 0.14448
   1   1   370936.42 1272.63   1 0.15822-0.04946 0.96544-0.90226-0.20706 0.42833
   1  -1   379403.87 1302.83   1 0.55144-0.44275 0.82673-0.88990 0.11146 0.10976
   1   1   4128264.8 1925.50   1 0.97220-0.85720-0.16380 0.22700-0.16727 0.46223
   1   1   4125956.0 1921.16   1-0.84477 0.95946-0.09779 0.16099 0.52610-0.23132
  -1   1  -4127115.4 1850.35   1-0.91666 0.80211 0.31414-0.25098 0.24705-0.54187
   1   1   4129688.5 1970.84   1-0.77560 0.89033 0.51251-0.44932 0.36845-0.07357
  -1   1  -4129445.7 2062.05   1 0.31066-0.42520 0.94580-0.88264-0.09460-0.20037
   1  -1   4136410.0 2085.42   1 0.56978-0.45526 0.81159-0.87476 0.12907 0.16589
   1   1   5102113.1 2476.77   1 0.97192-0.85099-0.22440 0.28761-0.07070 0.43940
   1   1   5111415.5 2720.66   1-0.85973 0.98030-0.08003 0.14323 0.50443-0.13595
  -1  -1  -598690.71 2421.54   1-0.99188 0.87111 0.07531-0.13852 0.10244-0.47113
  -1   1  -5107897.9 2577.14   1-0.98185 0.86131 0.13346-0.07032 0.13473-0.50317
   1   1   5106706.8 2592.58   1-0.76947 0.89009 0.51894-0.45576 0.37229-0.00370
   1  -1   595239.28 2275.27   1-0.48081 0.60148 0.72618-0.78938 0.49139-0.12281
  -1  -1  -598047.99 2428.33   1-0.06334-0.05713 0.93498-0.99817-0.34898-0.01980
  -1   1  -5111054.1 2770.33   1 0.26232-0.38269 0.95600-0.89284-0.13129-0.23742
   1  -1   6 5680.64  437.40   1-0.87266 0.99911-0.06371 0.00051 0.48415-0.04198
   1   1   6 4128.99  366.79   1-0.86184 0.98829-0.07744 0.14063 0.50123-0.05906
  -1   1  -6 4801.48  364.64   1-0.99891 0.87222-0.02633 0.08953 0.03841-0.48084
  -1  -1  -6 6270.86  802.22   1-0.99886 0.87217-0.01666-0.04654 0.04453-0.48697
   1  -1   6 5466.74  262.03   1-0.49374 0.62031 0.71981-0.78302 0.48793-0.04563
  -1  -1  -6 5930.21  770.88   1-0.07444-0.05188 0.93167-0.99485-0.35558-0.08696
  -1   1  -6 4929.18  798.71   1 0.21405-0.34036 0.96235-0.89916-0.16750-0.27503
   1   1   764184.14 2214.77   1-0.85679 0.98914-0.08361 0.14680 0.50882 0.00703
   1  -1   768757.53 2408.78   1-0.86736 0.99970-0.07052 0.00732 0.49265 0.02320
  -1  -1  -768000.53 2285.70   1-0.99457 0.86195-0.10350 0.04029-0.01078-0.50538
   1  -1   763577.41 2099.80   1-0.48109 0.61356 0.72605-0.78925 0.49132 0.02469
  -1  -1  -772150.59 2454.27   1-0.09518-0.03699 0.92502-0.98821-0.36777-0.14853
  -1   1  -766451.59 2411.45   1 0.16427-0.29643 0.96533-0.90214-0.20285-0.31345
   1   1   849865.76 2584.96   1-0.84688 0.98511-0.09535 0.15855 0.52315 0.06640
   1  -1   861963.96 3232.87   1-0.85816 0.99639-0.08195 0.01875 0.50679 0.08276
  -1  -1  -866614.48 3388.36   1-0.12296-0.01506 0.91519-0.97837-0.38379-0.20627
  -1   1  -853445.07 2763.28   1 0.11338-0.25140 0.96467-0.90149-0.23777-0.35228
   1  -1   911887.40  993.59   1-0.84569 0.98980-0.09674 0.03354 0.52482 0.13842
   1   1   911314.24  878.96   1-0.83310 0.97721-0.11094 0.17413 0.54188 0.12136
   1  -1   912013.40  811.18   1 0.91312-0.77001 0.36175-0.42500 0.18797 0.47586
  -1  -1  -912745.66  940.61   1-0.15621 0.01233 0.90198-0.96517-0.40251-0.26132
  -1   1  -912131.58 1268.91   1 0.06120-0.20506 0.96024-0.89706-0.27237-0.39144
   1   1  1024480.15 2017.81   1-0.81585 0.96585-0.12936 0.19255 0.56360 0.17334
   1  -1  1019031.33 1673.14   1-0.83021 0.98021-0.11410 0.05090 0.54564 0.19130
  -1   1 -1027479.58 2432.88   1 0.00614-0.15586 0.95188-0.88869-0.30640-0.43118
   1  -1  1116841.38 1442.84   1-0.81179 0.96767-0.13354 0.07034 0.56846 0.24217
  -1   1 -1124533.88 1888.33   1-0.04920-0.10636 0.93895-0.87577-0.34049-0.47085
   1  -1  12  880.25  392.05   1-0.79038 0.95215-0.15472 0.09152 0.59274 0.29158
   1   1  12  609.19  393.22   1-0.77130 0.93307-0.17249 0.23569 0.61264 0.27169
   1   2 -1224256.13 2744.50   1 0.90332-0.88300 0.01847 0.10793-0.42855-0.45677
   1  -2 -1153821.83 3893.57   1 0.92326-0.89704-0.01508-0.11132-0.38386-0.42769
   1   2 -1156904.53 8171.44   1 0.92152-0.89530-0.01193 0.13833-0.38812-0.42343
   1  -2 -1028463.48 2528.69   1 0.94239-0.91025-0.05411-0.07229-0.33010-0.40767
   1   2 -1030771.37 2549.96   1 0.93698-0.90484-0.04212 0.16853-0.34682-0.39095
  -1   2  1031728.58 2590.00   1 0.76737-0.80052 0.55591-0.42942 0.31953 0.41803
   1   2 -1029976.35 2422.99   1 0.15692-0.12422 0.96546-0.83909-0.20797-0.52960
   1   2  -9 1533.17  558.93   1 0.94978-0.91173-0.07224 0.19865-0.30445-0.35954
   1  -2  -9  306.41  243.27   1 0.95756-0.91952-0.09461-0.03179-0.27224-0.39175
  -1   2   9  625.49  272.12   1 0.80291-0.84210 0.51871-0.39223 0.29369 0.37015
   1   2  -9  491.85  206.71   1 0.24015-0.20160 0.95931-0.83294-0.14849-0.51532
   1   2  -828934.34 2614.33   1 0.95995-0.91599-0.10249 0.22890-0.26074-0.32947
   1  -2  -824960.03 1408.85   1 0.96835-0.92448-0.13661 0.01020-0.20884-0.38108
  -1  -2   823161.21 1182.31   1 0.29427-0.33863 0.81066-0.93717 0.50618 0.08385
  -1   2   824404.78 1389.34   1 0.83241-0.87737 0.48391-0.35743 0.27001 0.32007
   1   2  -824468.92 1348.29   1 0.32438-0.27986 0.94219-0.81587-0.08395-0.50599
  -1   2   821475.08 1125.83   1 0.63831-0.68292 0.74356-0.61718 0.19917 0.39076
   1  -2  -714098.25 1500.66   1 0.97348-0.92367-0.18303 0.05662-0.13722-0.37895
   1   2  -715117.51 2029.96   1 0.96757-0.91776-0.13248 0.25890-0.21506-0.30111
  -1  -2   712273.81  566.91   1-0.88655 0.83657 0.36819-0.49450 0.28010 0.23581
  -1  -2   713728.07  509.61   1 0.30598-0.35620 0.80781-0.93432 0.50378 0.01249
  -1   2   713745.95  730.63   1 0.85586-0.90659 0.45319-0.32671 0.24922 0.26709
   1   2  -713347.85  915.57   1 0.41254-0.36218 0.91084-0.78452-0.01287-0.50332
  -1   2   713046.79  532.73   1 0.57577-0.62619 0.80640-0.68006 0.13489 0.38130
   1   2  -6 3388.26  454.76   1 0.97221-0.91648-0.16387 0.29029-0.16715-0.27528
   1  -2  -6 2811.50  367.63   1 0.97055-0.91482-0.23488 0.10846-0.05343-0.38901
  -1  -2   6 1960.13  291.05   1-0.96144 0.90580 0.20721-0.33349 0.18079 0.26134
  -1  -2   6 2114.12  153.30   1 0.27178-0.32785 0.81576-0.94227 0.51054-0.06801
  -1   2   6 2872.19  331.81   1 0.87348-0.92999 0.42790-0.30142 0.23220 0.21036
  -1   2   6 2650.66  184.21   1 0.49307-0.54932 0.86807-0.74173 0.05765 0.38479
   1   2  -6 2688.32  301.97   1 0.50359-0.44734 0.86132-0.73498 0.06712-0.50957
   1  -2  -515840.19  540.07   1 0.95395-0.89226-0.29578 0.16938 0.04980-0.41853
  -1   2   517114.77  538.21   1 0.69783-0.75964-0.50994 0.63636 0.50296-0.13410
  -1  -2   515841.45  418.29   1-0.99882 0.93729-0.03650-0.08991 0.03195 0.33674
  -1  -2   517303.87  469.06   1 0.17366-0.23559 0.83252-0.95903 0.52605-0.15727
  -1   2   520302.24  742.98   1 0.88509-0.94737 0.41002-0.28353 0.22020 0.14860
  -1   2   518337.40  595.15   1 0.37651-0.43854 0.92543-0.79911-0.04250 0.41121
   1   2  -518991.79  590.23   1 0.59958-0.53751 0.78445-0.65811 0.15850-0.52722
  -1  -2   516453.97  556.35   1 0.82285-0.88464 0.33042-0.45678 0.46230-0.09350
  -1   2   519070.35  541.53   1 0.42333-0.48531-0.73234 0.85870 0.53334-0.16461
  -1   2   4170144.7 2478.25   1 0.64222-0.70990-0.52784 0.65426 0.55581-0.26072
  -1  -2   4191454.6 2680.66   1-0.00898-0.05876 0.84110-0.96755 0.54079-0.24573
  -1   2   4173226.8 2628.28   1 0.88977-0.95782 0.40250-0.27601 0.21516 0.07987
  -1   2   4172793.2 2460.44   1 0.18508-0.25288 0.96452-0.83816-0.18822 0.48325
   1   2  -4175715.0 2577.32   1 0.69618-0.62827 0.66759-0.54121 0.26392-0.55889
  -1  -2   4192222.3 2789.22   1 0.83062-0.89832 0.26839-0.39475 0.48787-0.19283
  -1   2   4174645.8 2473.81   1 0.52927-0.59709-0.62633 0.75269 0.57234-0.27735
   1   2  -383912.62 1371.58   1 0.96265-0.88916-0.27065 0.39705 0.00620-0.22744
  -1  -2   396121.09 1527.87   1 0.89051-0.96404-0.39194 0.26557 0.23100-0.00977
   1  -2  -3100482.6 1499.97   1 0.80827-0.73474-0.45729 0.33092 0.37090-0.59214
  -1   2   388552.79 1331.89   1 0.52236-0.59618-0.55279 0.67924 0.64927-0.42800
  -1  -2   398761.29 1416.06   1-0.26551 0.19191 0.80497-0.93139 0.53058-0.30930
   1   2  -389985.95 1292.12   1 0.54828-0.47458 0.71568-0.58917 0.43263-0.65394
  -1   2   390982.65 1503.08   1 0.88516-0.95899 0.40991-0.28342 0.22012 0.00115
   1   2  -389394.98 1385.51   1 0.78290-0.70925 0.49104-0.36470 0.38202-0.60327
  -1  -2   397418.97 1475.04   1 0.83511-0.90871 0.15795-0.28431 0.52691-0.30563
  -1   2   391081.21 1314.83   1 0.69703-0.77076-0.37968 0.50606 0.60826-0.38706
   1   2  -2109616.3 1674.70   1 0.94440-0.86501-0.31692 0.44333 0.08745-0.23494
   1  -2  -298088.25 1439.19   1 0.56131-0.48170-0.54622 0.41977 0.62173-0.76925
  -1   2   2110253.2 1603.07   1 0.27044-0.34998-0.56489 0.69134 0.77958-0.63209
  -1  -2   2100602.0 1457.89   1-0.51211 0.43277 0.71040-0.83681 0.48277-0.33533
   1   2  -2107311.4 1533.28   1-0.05231 0.13180 0.83902-0.71257 0.54157-0.68910
  -1   2   2106393.0 1648.54   1 0.86569-0.94529 0.43934-0.31285 0.23989-0.09237
   1   2  -2109565.2 1629.06   1 0.83323-0.75373 0.23459-0.10823 0.50067-0.64819
  -1   2   2110592.0 1575.07   1 0.82752-0.90697 0.04079 0.08557 0.55994-0.41239
   1  -2  -297673.40 1393.24   1 0.64526-0.56571-0.47043 0.34405 0.60192-0.74939
   1   2  -1321945.0 4515.27   1 0.90339-0.81811-0.37778 0.50415 0.20286-0.27661
   1  -2  -1307388.0 4278.65   1 0.07930 0.00607-0.54622 0.41980 0.83387-0.90759
   1   2  -1321195.9 4471.91   1-0.48275 0.56799 0.72524-0.59883 0.49088-0.56460
   1  -2  -1310774.6 4377.26   1 0.90330-0.81792 0.37960-0.50608 0.19986-0.27362
   1  -2  -1314529.6 4364.76   1 0.83475-0.74935 0.13971-0.26607 0.53259-0.60635
   1   2  -1320113.0 4488.96   1 0.80522-0.71985-0.08807 0.21445 0.58639-0.66017
  -1  -2   1314290.3 4407.25   1 0.74938-0.83479-0.26600 0.13958 0.60635-0.53257
  -1  -2   0329884.9 4568.80   1 0.60978-0.70097-0.53584 0.40940 0.58397-0.58397
   1  -2   0335309.5 4677.77   1-0.41840 0.50959-0.39790 0.27147 0.81646-0.81646
  -1   2   0360899.9 5019.54   1-0.57287 0.48168-0.31712 0.44354 0.75580-0.75580
  -1  -2   0341175.3 4783.10   1-0.80295 0.71188 0.48294-0.60926 0.34931-0.34931
  -1   2   0363665.5 5080.21   1 0.70993-0.80112 0.60789-0.48140 0.35559-0.35559
   1  -2   0314224.3 4400.58   1 0.82219-0.73104 0.49641-0.62290 0.27850-0.27850
  -1   2   0360491.4 5025.69   1 0.72541-0.81661 0.61961-0.49323 0.29975-0.29975
  -1  -2   0334735.6 4686.07   1 0.60405-0.69525-0.53198 0.40560 0.59338-0.59338
   1   2   1211440.7 2931.61   1 0.31884-0.22178-0.56606 0.69252 0.76020-0.68645
  -1  -2  -1216641.1 2998.00   1-0.16887 0.07183-0.49088 0.36445 0.85470-0.92844
  -1   2  -1205966.1 2938.69   1-0.79690 0.69987-0.14841 0.27481 0.58558-0.65928
  -1   2  -1209134.3 2953.74   1 0.47208-0.56913 0.75219-0.62568 0.45971-0.53348
  -1   2  -1213013.8 3054.33   1 0.64431-0.74134 0.73660-0.61022 0.20559-0.27933
   1   2   1216322.8 3105.17   1 0.53296-0.43591-0.62210 0.74846 0.57352-0.49977
   1   2   2445589.1 6139.99   1-0.45098 0.55387-0.38257 0.50899 0.80638-0.65889
   1  -2   2503540.2 7040.81   1-0.79410 0.89701-0.15114 0.02475 0.58869-0.44130
  -1  -2  -2511101.2 7031.07   1-0.85913 0.75621-0.08077-0.04561 0.50534-0.65273
   1   2   2434029.5 6097.06   1-0.81914 0.92195 0.46360-0.33729 0.33775-0.19034
  -1   2  -2459992.3 6355.09   1 0.02582-0.12879 0.84162-0.71517 0.53944-0.68697
   1  -2   2519872.2 7173.14   1 0.49884-0.39595 0.74024-0.86676 0.45076-0.30322
   1  -2   2506322.7 7079.55   1 0.69186-0.58901 0.67403-0.80041 0.25883-0.11135
   1   2   2466885.0 6532.99   1 0.40301-0.30011-0.74970 0.87606 0.52489-0.37740
   1  -2   3129349.6 2044.78   1 0.94413-0.83517-0.05817-0.06823-0.32439 0.54573
   1   2   3106446.4 1617.13   1 0.96491-0.85583-0.12021 0.24662-0.23343 0.45465
  -1   2  -3108893.6 1561.91   1-0.50821 0.39935 0.71243-0.58603 0.48388-0.70503
   1   2   4147548.4 3481.24   1 0.97306-0.85806-0.21149 0.33790-0.09174 0.38671
   1   2   4148079.7 3499.08   1-0.81054 0.92522-0.13482 0.26121 0.56995-0.27517
   1  -2   4144520.8 3495.52   1-0.86279 0.97747-0.07626-0.05013 0.49977-0.20499
  -1  -2  -4154397.9 3701.66   1-0.98314 0.86850 0.12752-0.25380 0.13100-0.42576
  -1   2  -4150660.1 3521.37   1-0.84777 0.73321 0.42639-0.30008 0.31538-0.61020
   1   2   4142504.8 3490.31   1-0.83183 0.94638 0.44761-0.32130 0.32816-0.03334
   1  -2   4151913.2 3542.47   1 0.04983 0.06486 0.84138-0.96784 0.53812-0.24305
   1   2   4143090.7 3411.46   1 0.09255 0.02205 0.96336-0.83699-0.25173 0.54676
  -1   2  -4147421.6 3649.66   1 0.44453-0.55907 0.89564-0.76932 0.01416-0.30914
   1   2   5102697.4 2469.11   1 0.96327-0.84258-0.26850 0.39490 0.00253 0.36619
   1   2   5108030.1 2614.90   1-0.83748 0.95805-0.10607 0.23246 0.53606-0.16759
   1  -2   5100314.2 2546.64   1-0.87049 0.99106-0.06652-0.05987 0.48766-0.11919
  -1  -2  -5106267.6 2679.45   1-0.99535 0.87458 0.04641-0.17282 0.08432-0.45302
  -1   2  -5107554.5 2549.24   1-0.97751 0.85698 0.15186-0.02558 0.14626-0.51470
  -1   2  -5105844.7 2641.39   1 0.38516-0.50554 0.92216-0.79584-0.03546-0.33325
   1   2   6210218.4 6241.98   1-0.84427 0.97072-0.09837 0.22476 0.52680-0.08464
   1  -2   6187903.6 5673.39   1-0.87071 0.99716-0.06623-0.06015 0.48731-0.04514
  -1   2  -6199568.6 5850.31   1-0.99699 0.87029-0.07725 0.20366 0.00600-0.44844
  -1  -2  -6199426.5 5955.57   1-0.99890 0.87221-0.02878-0.09762 0.03685-0.47928
   1  -2   6174558.9 5129.04   1-0.16057 0.28696 0.82660-0.95303 0.53938-0.09681
  -1   2  -6218954.3 6539.33   1 0.32713-0.45334 0.94142-0.81510-0.08180-0.36065
   1   2   723992.78 1006.08   1-0.84110 0.97345-0.10198 0.22838 0.53116-0.01530
   1  -2   718294.38  913.37   1-0.86597 0.99831-0.07228-0.05410 0.49484 0.02101
  -1  -2  -717349.59  746.91   1-0.99470 0.86208-0.10226-0.02415-0.00999-0.50618
   1  -2   717349.32  623.95   1-0.17979 0.31205 0.82338-0.94981 0.53824-0.02192
  -1   2  -723446.98 1004.56   1 0.26966-0.40171 0.95470-0.82837-0.12580-0.39040
   1  -2   822312.17 1343.42   1-0.85747 0.99570-0.08279-0.04359 0.50782 0.08173
   1   2   823646.34 1332.38   1-0.83175 0.96997-0.11242 0.23881 0.54364 0.04591
   1  -2   822636.92 1165.32   1 0.91043-0.77310 0.36674-0.49323 0.19130 0.39878
  -1   2  -826574.43 1463.25   1 0.21285-0.35087 0.96246-0.83610-0.16837-0.42168
   1  -2   933396.91 1974.69   1-0.84579 0.98990-0.09662-0.02976 0.52468 0.13856
   1   2   927053.73 1565.88   1-0.81776 0.96187-0.12737 0.25376 0.56128 0.10196
  -1   2  -928252.80 1606.69   1 0.15497-0.29884 0.96548-0.83912-0.20932-0.45449
   1   2  1022018.86 1847.40   1-0.79980 0.94980-0.14557 0.27196 0.58233 0.15460
   1  -2  1019364.58 1667.90   1-0.83119 0.98119-0.11303-0.01335 0.54437 0.19257
  -1   2 -1021643.09 1920.93   1 0.09627-0.24599 0.96364-0.83727-0.24925-0.48832
   1   2  11 1602.42  455.18   1-0.77811 0.93400-0.16626 0.29265 0.60571 0.20492
   1  -2  11 2370.69  628.73   1-0.81375 0.96963-0.13153 0.00514 0.56613 0.24450
  -1   2 -11 1599.39  430.01   1 0.03499-0.19057 0.95696-0.83059-0.28809-0.52325
   1  -3 -11 1762.71  428.93   1 0.91756-0.89134-0.00491-0.18469-0.39755-0.41400
   1   3 -11 2661.24  596.76   1 0.91671-0.89048-0.00344 0.19305-0.39953-0.41202
  -1   3  11 1796.89  536.53   1 0.76242-0.78978 0.56075-0.37102 0.32288 0.48845
   1   3 -10 7927.82 1031.48   1 0.93185-0.89971-0.03151 0.22112-0.36146-0.37631
   1  -3 -10 4099.88 1093.83   1 0.93885-0.90672-0.04617-0.14343-0.34119-0.39658
  -1   3  10 7117.82  912.39   1 0.79996-0.83338 0.52199-0.33226 0.29593 0.44167
   1   3 -10 6355.81 1372.48   1 0.25536-0.22251 0.95716-0.76768-0.13647-0.60095
   1   3  -946198.28 3810.73   1 0.94456-0.90651-0.05920 0.24881-0.32295-0.34105
   1  -3  -940226.84 2172.37   1 0.95586-0.91782-0.08935-0.10025-0.27988-0.38412
  -1   3   943281.23 2384.48   1 0.83160-0.87079 0.48492-0.29519 0.27069 0.39315
   1   3  -940090.68 2309.03   1 0.33902-0.30034 0.93798-0.74849-0.07247-0.59122
  -1   3   942794.45 2247.47   1 0.52477-0.56336-0.63143 0.82097 0.57087 0.09283
   1   3  -812263.29 1944.26   1 0.95493-0.91098-0.08657 0.27618-0.28390-0.30631
   1  -3  -810561.37 1602.90   1 0.96799-0.92411-0.13466-0.05495-0.21179-0.37813
  -1   3   813363.56 1461.25   1 0.85756-0.90252 0.45084-0.26111 0.24764 0.34244
   1   3  -813223.88 2090.95   1 0.42298-0.37846 0.90612-0.71664-0.00413-0.58581
  -1   3   814247.35 1459.33   1 0.52251-0.56695-0.63396 0.82350 0.57013 0.01982
   1   3  -7106465.3 3600.63   1 0.96316-0.91336-0.11312 0.30274-0.24395-0.27223
   1  -3  -7101610.8 3354.55   1 0.97355-0.92375-0.18556-0.00404-0.13322-0.38296
  -1   3   799345.82 3364.56   1 0.87832-0.92906 0.42057-0.23084 0.22727 0.28904
  -1   3   786160.63 2834.49   1 0.43713-0.48749 0.89935-0.70987 0.00784 0.50835
   1   3  -797875.88 3257.21   1 0.50638-0.45596 0.85948-0.66998 0.06965-0.58584
  -1   3   798485.75 3211.45   1 0.53632-0.58660-0.61822 0.80776 0.57459-0.05836
  -1   3   6138725.2 4668.68   1 0.89418-0.95069 0.39522-0.20549 0.21029 0.23226
  -1   3   6126074.5 4137.16   1 0.30024-0.35642 0.94832-0.75884-0.10261 0.54507
   1   3  -6129687.0 4320.61   1 0.59046-0.53421 0.79312-0.60361 0.14937-0.59183
  -1   3   6138956.6 4563.02   1 0.57108-0.62736-0.57601 0.76558 0.58485-0.14245
   1   3  -5148201.8 3683.50   1 0.97253-0.91088-0.16738 0.35700-0.16171-0.20698
   1  -3  -5132542.5 3184.86   1 0.94612-0.88443-0.31344 0.12384 0.08119-0.44992
  -1   3   5131449.1 3129.58   1 0.57067-0.63292-0.54442 0.73409 0.61476-0.24597
  -1   3   5141218.8 3464.39   1 0.90513-0.96741 0.37635-0.18663 0.19770 0.17110
  -1   3   5137455.7 3238.69   1 0.11209-0.17404 0.96461-0.77506-0.23865 0.60744
   1   3  -5139278.8 3356.82   1 0.67181-0.60973 0.70217-0.51261 0.23581-0.60452
  -1   3   5137645.7 3249.85   1 0.62931-0.69141-0.49521 0.68478 0.59893-0.23026
   1   3  -445958.29 1274.39   1 0.97364-0.90606-0.19491 0.38453-0.11838-0.17657
   1  -3  -457225.16 1415.60   1 0.88503-0.81738-0.39752 0.20796 0.24226-0.53724
  -1   3   448509.34 1214.75   1 0.46790-0.53594-0.55962 0.74929 0.68402-0.38899
  -1  -3   455364.87 1303.92   1-0.77376 0.70623 0.51446-0.70402 0.36961-0.07474
   1   3  -445927.24 1082.88   1 0.77135-0.70330 0.55207-0.36235 0.31656-0.61160
  -1   3   445777.93 1118.83   1-0.15067 0.08283 0.90429-0.71473-0.39943 0.69446
   1   3  -447330.41 1234.02   1 0.74603-0.67826 0.57972-0.39021 0.32763-0.62264
  -1  -3   450757.63 1299.00   1 0.83516-0.90286 0.17622-0.36576 0.52100-0.22596
  -1   3   450382.37 1247.06   1 0.70960-0.77739-0.35606 0.54568 0.60801-0.31286
   1   3  -347042.60  953.34   1 0.97204-0.89853-0.22331 0.41293-0.07249-0.14872
  -1   3   346283.73  938.03   1 0.90970-0.98353 0.36809-0.17837 0.19220 0.02908
   1   3  -346936.26  858.75   1 0.80513-0.73149 0.41734-0.22783 0.42140-0.64265
   1   3  -2207483.9 3050.97   1 0.96702-0.88763-0.25368 0.44328-0.02257-0.12491
   1  -3  -2218640.8 3078.15   1 0.39750-0.31796-0.56460 0.37492 0.72333-0.87082
  -1  -3   2216480.1 3068.05   1-0.84317 0.76383 0.43266-0.62213 0.31916-0.17175
   1   3  -2211724.0 2978.43   1-0.44324 0.52258 0.74351-0.55390 0.50071-0.64814
  -1   3   2203625.8 3002.73   1 0.89908-0.97869 0.38692-0.19720 0.20475-0.05723
  -1   3   2209121.4 2961.40   1 0.83233-0.91178 0.09231 0.09724 0.54653-0.39897
   1  -3  -2221205.5 3119.05   1 0.71654-0.63700-0.34164 0.15201 0.60814-0.75572
  -1  -3   1 7811.64  278.05   1 0.86879-0.95407-0.41274 0.22318 0.27356-0.19982
   1  -3  -1 6580.46  227.58   1-0.10572 0.19107-0.50829 0.31865 0.85466-0.92841
  -1   3   1 6051.11  236.41   1-0.44402 0.35868-0.38591 0.57555 0.80864-0.73490
  -1  -3   1 8231.18  589.31   1-0.87989 0.79469 0.37895-0.56843 0.28665-0.21295
   1   3  -1 7749.94  249.75   1-0.68290 0.76813 0.59831-0.40874 0.41912-0.49284
  -1   3   1 6329.26  318.22   1 0.87207-0.95744 0.43001-0.24028 0.23361-0.15985
  -1   3   1 7263.27  285.63   1 0.82473-0.91013 0.31797-0.12843 0.46766-0.39390
   1  -3  -1 6811.83  244.91   1 0.82543-0.74006 0.02388-0.21344 0.56399-0.63776
  -1  -3   1 6876.55  286.25   1 0.76085-0.84626-0.23588 0.04625 0.60453-0.53074
   1   3   0433429.0 6018.28   1 0.93554-0.84435-0.33322 0.52282 0.11713-0.11713
  -1  -3   0415561.1 5751.33   1 0.76157-0.85276-0.48296 0.29334 0.43213-0.43213
   1  -3   0422453.5 5880.13   1-0.50069 0.59188-0.35751 0.16787 0.78834-0.78834
  -1   3   0427158.4 5942.25   1-0.70923 0.61806-0.22438 0.41395 0.66830-0.66830
  -1  -3   0422132.5 5930.22   1-0.91259 0.82152 0.32203-0.51150 0.25190-0.25190
  -1   3   0434514.1 6077.24   1 0.78208-0.87334 0.49335-0.30384 0.38070-0.38070
   1   3   0404459.0 5684.30   1 0.75655-0.66526-0.24743 0.43706 0.60530-0.60530
   1   3   1189675.6 2635.44   1 0.86214-0.76511-0.41848 0.60804 0.28560-0.21186
  -1  -3  -1210864.9 2919.15   1 0.23757-0.33463-0.56324 0.37356 0.79139-0.86514
  -1   3  -1182099.1 2633.21   1-0.84653 0.74950-0.09576 0.28534 0.52364-0.59733
  -1  -3  -1208634.8 3069.16   1-0.94026 0.84332 0.26344-0.45286 0.21564-0.28933
   1   3   1184517.3 2712.26   1-0.83925 0.93620 0.43790-0.24843 0.32231-0.24861
  -1   3  -1188560.6 2699.78   1 0.68502-0.78201 0.62782-0.43808 0.36956-0.44331
   1  -3   1196920.6 2806.22   1 0.88876-0.79184 0.40414-0.59387 0.21626-0.14250
  -1   3  -1187052.2 2730.43   1 0.72460-0.82163 0.62105-0.43148 0.29872-0.37246
   1   3   1196243.8 2858.43   1 0.66331-0.56630-0.44074 0.63031 0.60477-0.53104
   1   3   261029.80  866.09   1 0.23339-0.13050-0.56299 0.75267 0.79282-0.64533
   1   3   259915.41 1058.27   1-0.85990 0.96272 0.40927-0.21980 0.30504-0.15763
  -1   3  -260577.19  941.83   1 0.41330-0.51619 0.77539-0.58562 0.47742-0.62496
   1  -3   261741.10 1048.41   1 0.77128-0.66827 0.52225-0.71176 0.36382-0.21632
   1   3   261083.28 1047.65   1 0.56679-0.46395-0.58146 0.77103 0.58365-0.43618
   1   3   3177355.8 2495.99   1 0.97150-0.86242-0.22799 0.41761-0.06480 0.28602
   1   3   3181546.7 2544.15   1-0.53878 0.64752-0.33682 0.52646 0.77217-0.55094
  -1  -3  -3153416.1 2355.96   1-0.97963 0.87090 0.14312-0.33254 0.14078-0.36185
  -1   3  -3179755.4 2526.46   1-0.08853-0.02030 0.83606-0.64639 0.54143-0.76273
   1   3   3185486.4 2754.02   1 0.48526-0.37652-0.67377 0.86331 0.55725-0.33601
   1   3   4324777.0 7528.57   1 0.95401-0.83922-0.29563 0.48523 0.04953 0.24545
   1   3   4347147.0 8043.79   1-0.73369 0.84839-0.20479 0.39435 0.64788-0.35313
   1  -3   4295705.2 6974.50   1-0.85626 0.97095-0.08425-0.10533 0.50961-0.21483
  -1  -3  -4305175.8 7184.98   1-0.99139 0.87654 0.07875-0.26837 0.10459-0.39955
   1  -3   4299407.3 6917.77   1 0.68293-0.56853 0.62943-0.81916 0.37069-0.07566
  -1   3  -4341144.0 8003.28   1 0.53776-0.65228 0.83731-0.64780 0.09856-0.39353
   1   3   4366977.4 8581.85   1 0.42584-0.31124-0.73014 0.91968 0.53436-0.23938
   1   3   556111.30 1487.81   1 0.93509-0.81440-0.33397 0.52358 0.11852 0.25020
   1   3   561082.15 1871.48   1-0.79231 0.91288-0.15287 0.34246 0.59065-0.22218
   1  -3   550572.23 1482.95   1-0.86436 0.98493-0.07430-0.11528 0.49734-0.12887
  -1  -3  -549157.32 1617.71   1-0.99771 0.87694 0.01644-0.20606 0.06546-0.43416
   1  -3   549516.46 1176.77   1 0.59605-0.47585 0.68868-0.87841 0.41283-0.04404
  -1   3  -562170.14 1997.00   1 0.47661-0.59696 0.87805-0.68854 0.04302-0.41174
   1   3   6 8188.29  714.52   1 0.91525-0.78866-0.36343 0.55303 0.17385 0.26862
   1   3   6 8894.22  462.01   1-0.81104 0.93750-0.13430 0.32389 0.56935-0.12718
   1  -3   6 9863.99  631.29   1-0.86528 0.99174-0.07314-0.11644 0.49591-0.05374
  -1  -3  -6 9075.49  505.32   1-0.99859 0.87190-0.04622-0.14339 0.02577-0.46821
   1  -3   6 9831.56  352.12   1 0.53113-0.40489 0.72458-0.91435 0.43916 0.00344
  -1   3  -6 8603.14 1161.88   1 0.41670-0.54291 0.90899-0.71951-0.00939-0.43306
   1   3   723305.68  968.19   1-0.81308 0.94542-0.13222 0.32180 0.56693-0.05107
   1  -3   728336.83 1223.19   1-0.86132 0.99366-0.07807-0.11150 0.50201 0.01384
  -1  -3  -726509.38 1058.10   1-0.99391 0.86129-0.10923-0.08038-0.01446-0.50171
   1  -3   726057.49  836.75   1 0.55510-0.42330 0.71211-0.90185 0.42982 0.08647
  -1   3  -721537.02  901.46   1 0.35643-0.48847 0.93247-0.74299-0.05866-0.45754
   1   3   8 9874.34 1060.27   1-0.80598 0.94421-0.13942 0.32901 0.57527 0.01428
   1  -3   813103.18 1455.91   1-0.85362 0.99185-0.08742-0.10216 0.51349 0.07606
  -1   3  -810518.19 1807.60   1 0.29606-0.43394 0.94928-0.75980-0.10581-0.48413
   1   3   9 2823.53  457.06   1-0.79271 0.93683-0.15248 0.34206 0.59020 0.07304
   1  -3   9 3541.35  668.40   1-0.84277 0.98688-0.10009-0.08949 0.52888 0.13436
  -1   3  -9 2933.91  540.52   1 0.23591-0.37978 0.95987-0.77032-0.15160-0.51221
   1   3  1023350.09 1738.45   1-0.77452 0.92451-0.16957 0.35915 0.60939 0.12754
   1  -3  1026739.04 2030.75   1-0.82902 0.97902-0.11539-0.07419 0.54717 0.18976
  -1   3 -1027731.19 2544.10   1 0.17441-0.32413 0.96501-0.77547-0.19574-0.54183
   1   3  1029108.29 2165.69   1 0.39620-0.24653-0.75534 0.94488 0.52200 0.21545
   1  -3  1116134.84 1775.60   1-0.81248 0.96836-0.13283-0.05675 0.56764 0.24299
   1   3  1116485.18 1663.17   1 0.91578-0.76112 0.35672-0.16700 0.18463 0.62673
  -1   3 -1113223.23 2828.47   1 0.11185-0.26742 0.96460-0.77505-0.23881-0.57251
   1  -3  12 9335.22 1242.40   1-0.79312 0.95489-0.15208-0.03749 0.58976 0.29456
  -1   3 -12 3825.20 1393.58   1 0.04786-0.20928 0.95850-0.76895-0.28101-0.60407
  -1  -4  12 6015.90 1023.39   1-0.89345 0.87293-0.03509-0.21769 0.44777 0.43656
   1   4 -1111988.38 1300.73   1 0.91030-0.88407 0.00733 0.24548-0.41387-0.39767
  -1   4  1112672.44 1351.28   1 0.78767-0.81503 0.53514-0.28216 0.30526 0.50607
   1   4 -11 8666.14 1685.17   1 0.25234-0.22532 0.95764-0.70500-0.13871-0.67245
   1   4 -10 4463.39  978.14   1 0.92520-0.89307-0.01867 0.27148-0.37900-0.35877
   1  -4 -10 6975.75 1329.12   1 0.93182-0.89969-0.03146-0.22135-0.36153-0.37624
  -1   4  10 4445.50  957.51   1 0.82106-0.85448 0.49777-0.24480 0.27942 0.45818
   1   4 -10 2761.18  755.21   1 0.33451-0.30167 0.93931-0.68667-0.07601-0.66141
   1   4  -9 9309.44 1207.13   1 0.93785-0.89980-0.04398 0.29680-0.34423-0.31976
   1  -4  -9 8016.11 1196.75   1 0.95166-0.91361-0.07727-0.17553-0.29727-0.36673
  -1   4   9 8456.04 1135.51   1 0.84924-0.88843 0.46217-0.20920 0.25529 0.40855
   1   4  -9 8371.27 1583.03   1 0.41527-0.37659 0.90963-0.65698-0.01059-0.65310
   1   4  -827386.19 2862.93   1 0.94837-0.90441-0.06859 0.32141-0.30965-0.28056
   1  -4  -827528.46 2226.74   1 0.96620-0.92232-0.12589-0.12692-0.22495-0.36497
  -1   4   828638.51 1762.12   1 0.87238-0.91734 0.42954-0.17657 0.23330 0.35678
   1   4  -825812.72 1502.44   1 0.49367-0.44908 0.86769-0.61502 0.05819-0.64813
  -1   4   825271.15 1421.42   1 0.64431-0.68894-0.47195 0.72471 0.60176-0.01189
   1   4  -735127.45 2723.07   1 0.95687-0.90701-0.09245 0.34527-0.27538-0.24105
   1  -4  -737586.28 1443.67   1 0.97342-0.92362-0.18154-0.07128-0.13957-0.37661
  -1   4   731323.49 1376.26   1 0.89093-0.94166 0.40060-0.14763 0.21389 0.30242
  -1   4   727382.42 1099.27   1 0.28256-0.33291 0.95219-0.69955-0.11608 0.63228
   1   4  -733524.56 1371.87   1 0.57091-0.52048 0.81062-0.55795 0.13016-0.64635
  -1   4   733325.43 1286.13   1 0.66140-0.71185-0.44398 0.69674 0.60450-0.08836
   1   4  -6 5833.44  528.34   1 0.96362-0.90789-0.11493 0.36776-0.24126-0.20117
   1  -4  -6 3532.65  467.57   1 0.96842-0.91263-0.24700-0.00579-0.03374-0.40873
  -1   4   6 3753.19  250.13   1 0.47884-0.53530-0.55845 0.81135 0.67737-0.23483
  -1   4   6 4069.12  440.63   1 0.90516-0.96167 0.37630-0.12333 0.19766 0.24489
  -1   4   6 2754.98  404.11   1 0.11031-0.16641 0.96452-0.71179-0.23984 0.68239
   1   4  -6 2933.07  275.36   1 0.64439-0.58813 0.73651-0.48376 0.20567-0.64813
  -1   4   6 3730.52  288.27   1 0.69153-0.74781-0.39019 0.64295 0.60788-0.16547
   1   4  -585402.30 2698.88   1 0.96843-0.90677-0.13703 0.38986-0.20821-0.16049
   1  -4  -580446.38 2427.10   1 0.93936-0.87767-0.32650 0.07369 0.10482-0.47355
  -1   4   578964.17 2376.48   1 0.38648-0.44851-0.56507 0.81798 0.72892-0.36019
  -1   4   580977.19 2572.74   1 0.91514-0.97742 0.35794-0.10497 0.18544 0.18336
  -1   4   571068.16 2138.50   1-0.10438 0.04239 0.92189-0.66914-0.37312 0.74191
   1   4  -584217.16 2604.64   1 0.71255-0.65047 0.64171-0.38896 0.28366-0.65237
  -1   4   581578.41 2463.57   1 0.73360-0.79551-0.30403 0.55687 0.60776-0.23883
   1   4  -4121957.8 3058.48   1 0.97157-0.90399-0.15793 0.41075-0.17633-0.11862
   1  -4  -4115575.5 2739.29   1 0.85654-0.78888-0.42313 0.17039 0.29545-0.59044
  -1   4   4115244.2 2729.85   1 0.22164-0.28952-0.56221 0.81511 0.79673-0.50175
   1   4  -4112490.6 2615.24   1 0.32610-0.25831 0.80260-0.54958 0.49947-0.79449
   1   4  -4117846.0 2875.68   1 0.77046-0.70269 0.52431-0.27163 0.36258-0.65759
  -1   4   4116083.7 2770.71   1 0.77862-0.84641-0.18382 0.43666 0.59995-0.30481
   1   4  -3 9562.68 1184.30   1 0.97322-0.89971-0.17719 0.43001-0.14640-0.07481
  -1   4   3 6525.29  260.12   1-0.04334-0.03045-0.52319 0.77602 0.85111-0.62996
  -1  -4   3 4840.86  349.28   1-0.96350 0.89016 0.20093-0.45349 0.17688 0.04418
   1   4  -3 6184.08  218.57   1-0.32958 0.40318 0.78671-0.53386 0.52197-0.74326
  -1   4   3 7352.15  486.27   1 0.92080-0.99463 0.34695-0.09398 0.17813 0.04314
   1   4  -3 6359.77  343.30   1 0.81359-0.73994 0.38123-0.12855 0.43901-0.66026
  -1   4   3 5991.17  294.15   1 0.81651-0.89004-0.03319 0.28593 0.57637-0.35504
   1  -4  -3 4057.59  254.88   1 0.56851-0.49478-0.57928 0.32652 0.58413-0.80533
   1  -4  -225270.33  457.00   1 0.24718-0.16764-0.56380 0.31089 0.78805-0.93554
  -1  -4   225112.35  503.13   1-0.95288 0.87364 0.23157-0.48413 0.19592-0.04854
   1  -4  -224258.60  516.33   1 0.73262-0.65308-0.30628 0.05345 0.60781-0.75539
   1   4  -1135059.8 2028.49   1 0.97335-0.88798-0.20628 0.45910-0.10016 0.02642
  -1  -4   1144297.0 2117.60   1 0.89417-0.97945-0.38808 0.13534 0.22326-0.14952
  -1   4   1128826.4 1873.81   1-0.64104 0.55576-0.27382 0.52657 0.71699-0.64330
   1   4  -1129940.9 1928.54   1-0.76896 0.85419 0.51947-0.26672 0.37260-0.44632
  -1   4   1130187.2 2020.84   1 0.89552-0.98089 0.39299-0.14002 0.20880-0.13504
  -1   4   1129106.3 1938.05   1 0.82816-0.91356 0.29173-0.03901 0.47857-0.40481
   1   4  -1129715.9 1993.43   1 0.82695-0.74158 0.03601 0.21673 0.56110-0.63488
   1  -4  -1145348.9 2136.83   1 0.81421-0.72884-0.04547-0.20726 0.57877-0.65255
   1   4   067633.26 1208.10   1 0.97323-0.88194-0.20852 0.46135-0.09654 0.09654
  -1  -4   063847.58  984.15   1 0.83086-0.92202-0.44247 0.18973 0.33744-0.33744
   1  -4   063335.76 1024.60   1-0.53839 0.62958-0.33704 0.08419 0.77235-0.77235
  -1   4   065990.21 1065.51   1-0.79982 0.70867-0.14556 0.39834 0.58232-0.58232
   1   4   066016.03 1105.68   1-0.83485 0.92592 0.44369-0.19107 0.32580-0.32580
  -1   4   066662.31 1128.40   1 0.85695-0.94810 0.45168-0.19871 0.24820-0.24820
  -1   4   068623.73 1171.17   1 0.80120-0.89246 0.43219-0.17951 0.41385-0.41385
   1  -4   061105.74 1005.97   1 0.83512-0.74382 0.15886-0.41158 0.52662-0.52662
   1   4   069082.80 1178.88   1 0.79088-0.69959-0.14266 0.39550 0.59509-0.59509
   1  -4   179963.96 1288.34   1-0.70285 0.79990-0.22932-0.02343 0.67335-0.59966
  -1   4  -180839.00 1301.56   1-0.88422 0.78719-0.04820 0.30099 0.46457-0.53826
   1   4   176153.54 1269.38   1-0.86588 0.96283 0.40049-0.14787 0.29972-0.22602
  -1   4  -180443.55 1326.40   1 0.76005-0.85719 0.54930-0.29662 0.34724-0.42099
   1  -4   2184950.9 2727.56   1 0.92935-0.82631-0.02658-0.22622-0.36821 0.51577
  -1  -4  -2195754.2 2949.83   1-0.98223 0.87939 0.13173-0.38429 0.13364-0.28102
  -1   4  -2213771.5 3172.44   1 0.71107-0.81392 0.64415-0.39139 0.28184-0.42933
  -1   4  -3130154.8 3050.41   1 0.28365-0.39246 0.81313-0.56011 0.50828-0.72954
   1   4   3133653.2 3236.35   1 0.60382-0.49517-0.53230 0.78506 0.59333-0.37213
   1   4   5 6560.57  269.30   1 0.85022-0.72968-0.42817 0.68092 0.30623 0.06249
   1   4   5 6907.43  324.08   1-0.69477 0.81537-0.23546 0.48822 0.67958-0.31114
  -1   4  -5 7710.92  480.55   1 0.54288-0.66323 0.83342-0.58074 0.10336-0.47207
   1   4   5 6730.22  420.15   1 0.51147-0.39103-0.64616 0.89888 0.56644-0.19771
   1   4   623242.20  839.88   1 0.84280-0.71639-0.43385 0.68659 0.31851 0.12396
   1   4   625428.18  927.26   1-0.74729 0.87377-0.19339 0.44614 0.63572-0.19359
   1  -4   634237.57 1403.98   1-0.85686 0.98332-0.08352-0.16925 0.50872-0.06656
  -1  -4  -633741.06 1319.18   1-0.99766 0.87097-0.06714-0.18569 0.01245-0.45489
  -1   4  -622069.82  916.77   1 0.48398-0.61016 0.87367-0.62099 0.04955-0.49200
   1   4   625506.69 1029.67   1 0.48568-0.35939-0.67336 0.92607 0.55740-0.11492
   1   4   7 9764.24  451.95   1 0.82747-0.69518-0.44482 0.69756 0.34266 0.17355
   1   4   712378.01  604.65   1-0.76309 0.89544-0.17986 0.43264 0.62074-0.10488
   1  -4   7 9443.93  688.56   1-0.85384 0.98618-0.08716-0.16562 0.51317 0.00268
  -1   4  -711933.45 1434.71   1 0.42494-0.55698 0.90521-0.65257-0.00248-0.51372
   1   4   713685.66  764.85   1 0.47205-0.33992-0.68703 0.93975 0.55240-0.03617
   1   4   8 3403.91  395.77   1-0.76253 0.90076-0.18036 0.43314 0.62129-0.03173
   1  -4   8 6981.74  860.34   1-0.84702 0.98525-0.09519-0.15759 0.52295 0.06660
  -1   4  -8 3849.84  743.83   1 0.36448-0.50236 0.92974-0.67710-0.05221-0.53773
   1   4   8 3940.43  509.85   1 0.46888-0.33091-0.69014 0.94286 0.55121 0.03874
   1   4   931579.44 1577.17   1-0.75243 0.89656-0.18898 0.44173 0.63097 0.03222
   1  -4   932389.66 1797.74   1-0.83701 0.98112-0.10659-0.14618 0.53669 0.12655
  -1   4  -933931.36 1788.93   1 0.30313-0.44684 0.94764-0.69500-0.10039-0.56329
   1   4   931279.75 1618.25   1 0.47460-0.33078-0.68451 0.93723 0.55334 0.11036
   1  -4  10 7375.10 1675.67   1-0.82410 0.97410-0.12068-0.13209 0.55343 0.18351
  -1   4 -10 6473.72 1770.03   1 0.24134-0.39106 0.95914-0.70641-0.14761-0.58995
   1   4  10 7972.99  734.94   1 0.48786-0.33820-0.67112 0.92384 0.55819 0.17926
   1  -4  11 4916.35  944.62   1-0.80840 0.96429-0.13698-0.11579 0.57245 0.23818
   1   4  11 4103.84  804.40   1 0.92193-0.76728 0.34471-0.09174 0.17665 0.63471
  -1   4 -11 4005.93 1102.24   1 0.17767-0.33325 0.96488-0.71215-0.19344-0.61788
   1   5 -11 6472.87  938.39   1 0.90225-0.87602 0.02013 0.29588-0.43073-0.38082
  -1   5  11 6373.07  971.59   1 0.80350-0.83114 0.51805-0.20184 0.29324 0.51812
   1   5 -11 5036.59 1236.54   1 0.31737-0.29036 0.94407-0.62827-0.08940-0.72177
   1   5 -1025603.34 2003.32   1 0.91695-0.88481-0.00385 0.31987-0.39898-0.33879
  -1   5  1024893.61 1879.71   1 0.83410-0.86751 0.48180-0.16559 0.26857 0.46902
   1   5 -1021827.53 1593.74   1 0.39623-0.36338 0.91776-0.60196-0.02638-0.71104
   1  -5  -955462.45 2639.65   1 0.94313-0.90509-0.05583-0.26018-0.32768-0.33632
  -1   5   951349.12 2599.85   1 0.85959-0.89878 0.44801-0.13180 0.24573 0.41811
   1   5  -951918.66 2554.76   1 0.47165-0.43288 0.88093-0.56509 0.03865-0.70233
   1   5  -816976.17 1291.86   1 0.94006-0.89610-0.04883 0.36485-0.33749-0.25273
   1  -5  -819442.65 1251.65   1 0.96170-0.91783-0.10762-0.20840-0.25206-0.33786
  -1   5   816691.89 1214.70   1 0.88052-0.92548 0.41719-0.10098 0.22501 0.36507
   1   5  -819416.53 1330.14   1 0.54496-0.50037 0.83181-0.51596 0.10533-0.69527
  -1   5   816768.10 1083.13   1 0.72580-0.77008-0.32164 0.63769 0.60807-0.01777
   1   5  -7 5152.76  824.86   1 0.94874-0.89888-0.06956 0.38558-0.30828-0.20816
   1  -5  -7 2219.61  473.68   1 0.97260-0.92280-0.16822-0.14780-0.16040-0.35578
  -1   5   7 3700.56  630.42   1 0.89729-0.94802 0.39000-0.07378 0.20680 0.30951
   1   5  -7 4711.43  584.74   1 0.61452-0.56410 0.76953-0.45369 0.17369-0.68988
  -1   5   7 4747.34  575.83   1 0.73904-0.78920-0.29132 0.60737 0.60741-0.09090
   1   5  -637078.93 1473.52   1 0.95569-0.89991-0.08882 0.40484-0.28065-0.16201
   1  -5  -627460.31 1032.58   1 0.96957-0.91384-0.24092-0.07510-0.04338-0.39905
  -1   5   634523.65 1195.50   1 0.27774-0.33394-0.56516 0.88130 0.77681-0.33434
  -1   5   634270.01 1445.72   1 0.91015-0.96666 0.36727-0.05106 0.19165 0.25091
  -1   5   628636.30  993.04   1-0.04687-0.00926 0.93958-0.62365-0.33908 0.78164
   1   5  -635423.60 1369.01   1 0.67860-0.62234 0.69296-0.37702 0.24350-0.68595
  -1   5   634400.77 1219.37   1 0.75954-0.81557-0.23944 0.55549 0.60478-0.16206
   1   5  -522324.51 1096.36   1 0.96101-0.89933-0.10622 0.42224-0.25527-0.11361
   1  -5  -523522.68  878.46   1 0.93553-0.87384-0.33324 0.01723 0.11717-0.48590
  -1   5   519492.07  710.01   1 0.13275-0.19496-0.55359 0.86964 0.82213-0.45355
  -1   5   519969.98  907.40   1 0.91919-0.98147 0.35013-0.03391 0.18024 0.18855
   1   5  -519708.36  838.61   1 0.73589-0.67381 0.60024-0.28430 0.31330-0.68201
  -1   5   520834.88  802.59   1 0.78449-0.84640-0.16478 0.48083 0.59784-0.22891
   1   5  -417144.50 1656.80   1 0.96502-0.89744-0.12069 0.43672-0.23272-0.06223
   1  -5  -410928.62  402.93   1 0.82836-0.76071-0.44421 0.12828 0.34129-0.63628
  -1   5   414334.91  504.82   1-0.08770 0.01970-0.51277 0.82882 0.85403-0.55916
  -1  -5   410098.94  351.92   1-0.99536 0.92791-0.09600-0.22003-0.00598 0.30094
   1   5  -413423.90  444.23   1-0.11719 0.18494 0.83293-0.51680 0.54081-0.83588
  -1   5   415947.88  874.55   1 0.92425-0.99230 0.34005-0.02384 0.17356 0.12148
   1   5  -413865.89  614.45   1 0.78272-0.71495 0.49155-0.17570 0.38173-0.67673
  -1   5   414415.67  592.53   1 0.80960-0.87722-0.06825 0.38419 0.58298-0.28788
   1  -5  -411563.93  454.43   1 0.44434-0.37652-0.71346 0.39756 0.54177-0.83676
   1   5  -3299603.0 7084.59   1 0.96748-0.89397-0.13205 0.44808-0.21572-0.00550
   1  -5  -3318531.4 7381.18   1 0.56485-0.49103-0.54555 0.22943 0.61911-0.84038
  -1   5   3303227.1 7028.93   1-0.36332 0.28967-0.42200 0.73806 0.83060-0.60938
  -1  -5   3313137.6 7286.51   1-0.99539 0.92202 0.04598-0.36202 0.08405 0.13716
   1   5  -3302451.7 7021.16   1-0.52929 0.60272 0.70119-0.38517 0.47768-0.69883
  -1   5   3320238.2 7583.83   1 0.92473-0.99856 0.33906-0.02284 0.17290 0.04837
   1   5  -3317946.1 7478.49   1 0.81649-0.74290 0.36636-0.05046 0.44621-0.66749
  -1   5   3307972.6 7194.85   1 0.82803-0.90156 0.04527 0.27065 0.55884-0.33751
   1  -5  -3315867.5 7360.52   1 0.61406-0.54032-0.51776 0.20181 0.59569-0.81689
   1   5  -2161974.7 3900.86   1 0.96856-0.88912-0.13772 0.45375-0.20716 0.05968
  -1  -5   2145909.5 3491.98   1 0.91963-0.99902-0.35754 0.04153 0.16260-0.01511
   1  -5  -2158521.8 3706.33   1 0.13054-0.05096-0.55332 0.23728 0.82267-0.97010
  -1   5   2156738.8 3670.93   1-0.61002 0.53062-0.29418 0.61012 0.73574-0.58837
  -1  -5   2161635.6 3850.50   1-0.98870 0.90946 0.09863-0.41434 0.11284 0.03453
   1   5  -2153405.9 3620.02   1-0.71623 0.79556 0.57004-0.25409 0.40256-0.55000
   1  -5  -2163779.2 3874.61   1 0.73478-0.65524-0.30132-0.01472 0.60770-0.75527
   1   5  -134503.55  738.72   1 0.96770-0.88234-0.13318 0.44921-0.21402 0.14028
  -1  -5   132151.55  626.81   1 0.90501-0.99029-0.37589 0.05996 0.19914-0.12539
   1  -5  -133649.89  640.05   1-0.28570 0.37104-0.45241 0.13635 0.84480-0.91854
  -1   5   133324.41  612.76   1-0.77086 0.68560-0.17289 0.48887 0.61308-0.53938
  -1  -5   133022.64 1097.42   1-0.98534 0.90021 0.11680-0.43250 0.12427-0.05058
   1   5  -132758.44 1238.31   1-0.80825 0.89346 0.47673-0.16094 0.34560-0.41931
  -1   5   135380.41  976.97   1 0.82835-0.91375 0.29014 0.02574 0.47921-0.40545
   1  -5  -130933.00  859.18   1 0.80277-0.71739-0.09851-0.21741 0.58809-0.66186
   1   5   022111.83  459.28   1 0.96102-0.86979-0.10623 0.42226-0.25524 0.25524
   1  -5   017745.45  441.23   1-0.55069 0.64189-0.33007 0.01401 0.76666-0.76666
  -1   5   022489.13  494.08   1-0.86182 0.77068-0.07745 0.39343 0.50125-0.50125
  -1   5   021744.08  503.71   1-0.99316 0.90201-0.11527 0.43131-0.01833 0.01833
  -1  -5   017193.37  531.39   1-0.98602 0.89498 0.11335-0.42905 0.12210-0.12210
   1   5   022288.44  543.35   1-0.85423 0.94530 0.41739-0.10160 0.30994-0.30994
  -1   5   022969.68  584.96   1 0.87620-0.96735 0.42381-0.10759 0.22945-0.22945
   1   5   022173.78  615.73   1 0.81069-0.71940-0.06309 0.37903 0.58206-0.58206
   1  -5   1231089.2 5423.79   1 0.91261-0.81547 0.00351-0.31953-0.40881 0.48258
   1   5   1252576.5 5846.91   1 0.92061-0.82347-0.01028 0.32630-0.39034 0.46411
  -1  -5  -1234304.1 5423.24   1 0.69012-0.78719-0.51270 0.19667 0.51073-0.58450
   1  -5   1237775.2 5589.88   1-0.69403 0.79108-0.23603-0.07990 0.68015-0.60646
  -1  -5  -1225815.9 5358.76   1-0.98909 0.89215 0.09636-0.41206 0.11141-0.18510
  -1   5  -1254236.3 5964.93   1 0.82058-0.91750 0.49834-0.18213 0.27981-0.35357
  -1   5  -1246701.0 5824.97   1 0.77698-0.87411 0.50742-0.19157 0.37259-0.44634
   1   5   1240426.8 5673.63   1 0.77440-0.67723-0.19689 0.51293 0.60127-0.52748
   1  -5   2 5693.33  360.88   1-0.77008 0.87300-0.17360-0.14237 0.61386-0.46647
  -1  -5  -2 5797.32  942.94   1-0.99280 0.88980 0.06852-0.38456 0.09819-0.24566
  -1   5  -2 9110.38  364.40   1 0.71221-0.81501 0.60599-0.28977 0.35427-0.50178
  -1   5  -2 7990.93  450.74   1 0.73774-0.84059 0.59669-0.28074 0.31573-0.46322
   1  -5   3148461.3 3637.42   1-0.81074 0.91954-0.13461-0.18136 0.56971-0.34862
  -1   5  -3120323.5 2841.34   1-0.99585 0.88693-0.09091 0.40695-0.00273-0.21848
  -1  -5  -3147345.4 3602.84   1-0.99639 0.88747 0.03513-0.35116 0.07723-0.29845
  -1   5  -3125062.0 2953.26   1 0.49725-0.60598 0.74098-0.42470 0.45131-0.67261
  -1   5  -3129571.1 3198.95   1 0.69212-0.80080 0.67364-0.35770 0.25914-0.48037
   1   5   3122415.9 3011.17   1 0.68309-0.57444-0.40590 0.72185 0.60714-0.38594
  -1   5  -4121382.3 3574.49   1-0.99791 0.88306 0.01290 0.30313 0.06323-0.35818
  -1  -5  -4146396.0 4484.33   1-0.99858 0.88373-0.00318-0.31285 0.05307-0.34802
  -1   5  -4129349.6 3804.93   1 0.06341-0.17811 0.84103-0.52491 0.53724-0.83231
  -1   5  -4127731.6 3905.65   1 0.64223-0.75673 0.73903-0.42309 0.20336-0.49833
   1   5   4126912.1 3864.65   1 0.64106-0.52658-0.47709 0.79304 0.60117-0.30624
   1   5   534090.08 1131.91   1 0.54873-0.42860-0.54851 0.86463 0.63089-0.26211
   1   5   533973.19 1131.00   1-0.41488 0.53531-0.39951 0.71557 0.81747-0.44876
   1  -5   548747.07 1874.05   1-0.84258 0.96315-0.10030-0.21567 0.52913-0.16066
  -1   5  -534013.60 1351.92   1 0.58952-0.70987 0.79399-0.47814 0.14844-0.51716
   1   5   536645.94 1380.01   1 0.60675-0.48645-0.52819 0.84414 0.59402-0.22535
   1   5   649241.01 1615.31   1 0.66678-0.54034-0.52050 0.83654 0.53336-0.09072
   1   5   651413.12 1692.48   1-0.60750 0.73398-0.29578 0.61172 0.73718-0.29505
   1  -5   648144.57 1831.18   1-0.84570 0.97216-0.09672-0.21925 0.52481-0.08264
  -1  -5  -652402.83 1912.41   1-0.99589 0.86920-0.09045-0.22558-0.00243-0.43999
  -1   5  -650786.12 1833.39   1 0.53425-0.66043 0.83993-0.52409 0.09528-0.53773
   1   5   655400.68 1952.31   1 0.58169-0.45557-0.56230 0.87825 0.58774-0.14534
   1  -5   7123265.1 6252.83   1-0.84375 0.97609-0.09896-0.21701 0.52752-0.01166
  -1   5  -796213.21 4830.38   1 0.47711-0.60911 0.87776-0.56192 0.04346-0.55966
   1   5   7112914.9 5636.92   1 0.56605-0.43411-0.58239 0.89834 0.58344-0.06730
   1   5   863331.75 3800.82   1-0.68591 0.82416-0.24209 0.55803 0.68623-0.09672
   1  -5   862098.54 3924.43   1-0.83789 0.97612-0.10560-0.21037 0.53551 0.05404
  -1   5  -864925.83 4025.34   1 0.41897-0.55685 0.90796-0.59216-0.00749-0.58245
   1   5   865280.99 3980.53   1 0.55897-0.42100-0.59111 0.90701 0.58148 0.00848
   1  -5   9 7352.86 1097.13   1-0.82876 0.97287-0.11568-0.20029 0.54751 0.11573
  -1   5  -9 6366.24 1133.53   1 0.35867-0.50239 0.93172-0.61592-0.05686-0.60682
   1   5   9 6846.10  936.10   1 0.56021-0.41639-0.58958 0.90548 0.58184 0.08187
   1  -5  10 7358.83 1009.61   1-0.81667 0.96667-0.12850-0.18747 0.56260 0.17433
  -1   5 -10 3259.18  963.56   1 0.29681-0.44636 0.94911-0.63331-0.10524-0.63219
   1   5  10 5506.83  961.56   1 0.56889-0.41948-0.57880 0.89475 0.58424 0.15308
   1  -5  11 5733.08  891.81   1-0.80179 0.95767-0.14361-0.17236 0.58009 0.23054
   1   5  11 4163.69  829.68   1 0.92436-0.76970 0.33982-0.02361 0.17341 0.63795
  -1  -6  11 2840.92  893.34   1-0.89300 0.86660-0.03574-0.34342 0.44861 0.36201
  -1   6  11 3932.34 1117.02   1 0.81338-0.84102 0.50681-0.12735 0.28557 0.52579
   1   6 -11 3323.99 1156.05   1 0.36891-0.34190 0.92818-0.54922-0.04864-0.76253
  -1   6  1018435.92 1576.91   1 0.84144-0.87485 0.47244-0.09299 0.26223 0.47537
   1   6 -1013585.37 2337.78   1 0.44368-0.41083 0.89608-0.51712 0.01343-0.75086
   1   6  -9 9818.34 1239.40   1 0.91936-0.88132-0.00807 0.38729-0.39331-0.27068
  -1   6   9 8412.61 1108.26   1 0.86482-0.90401 0.44059-0.06114 0.24073 0.42311
   1   6  -9 9924.04 1227.33   1 0.51412-0.47535 0.85428-0.47526 0.07669-0.74037
   1  -6  -836919.60 1937.90   1 0.95128-0.90732-0.07625-0.30297-0.29874-0.29147
   1   6  -836133.38 2089.33   1 0.92981-0.88586-0.02748 0.40670-0.36699-0.22323
  -1   6   837732.65 2184.68   1 0.88401-0.92897 0.41173-0.03228 0.22135 0.36873
   1   6  -840732.26 2242.45   1 0.58140-0.53680 0.80140-0.42239 0.14041-0.73035
  -1   6   836850.58 1954.27   1 0.77564-0.81992-0.19311 0.57237 0.60090-0.01061
   1   6  -756743.82 3181.28   1 0.93843-0.88857-0.04524 0.42447-0.34248-0.17396
   1  -6  -758513.72 3143.18   1 0.96902-0.91922-0.14034-0.23889-0.20320-0.31298
  -1   6   756161.83 3202.11   1 0.89935-0.95009 0.38646-0.00700 0.20444 0.31188
   1   6  -755854.30 3091.28   1 0.64354-0.59310 0.73751-0.35838 0.20476-0.72096
  -1   6   756609.09 3069.95   1 0.78411-0.83427-0.16603 0.54529 0.59798-0.08148
   1   6  -6 4543.06  846.34   1 0.94530-0.88953-0.06098 0.44021-0.32043-0.12223
   1  -6  -6 2908.48  532.30   1 0.97216-0.91643-0.22215-0.15707-0.07438-0.36805
  -1   6   6 2717.91  476.41   1 0.91109-0.96760 0.36553 0.01392 0.19049 0.25207
   1   6  -6 3132.40  369.30   1 0.70015-0.64389 0.66153-0.28239 0.26863-0.71109
  -1   6   6 3497.26  372.74   1 0.79662-0.85265-0.12138 0.50064 0.59216-0.14944
   1   6  -564204.79 2331.45   1 0.95048-0.88880-0.07411 0.45334-0.30179-0.06709
   1  -6  -567163.99 2218.84   1 0.93710-0.87541-0.33052-0.04868 0.11217-0.48090
  -1   6   558644.78 1918.09   1-0.18365 0.12170-0.48647 0.86574 0.85417-0.48545
   1   6  -557552.26 1834.26   1 0.35633-0.29430 0.79419-0.41465 0.49222-0.86107
   1   6  -560458.44 1927.48   1 0.75177-0.68948 0.57109-0.19164 0.32967-0.69848
  -1   6   561567.01 2291.51   1 0.91930-0.98158 0.34990 0.02954 0.18010 0.18870
   1   6  -560834.20 2150.31   1 0.74876-0.68686 0.57406-0.19504 0.33136-0.70012
  -1   6   559591.90 2029.28   1 0.81140-0.87309-0.05965 0.43877 0.58143-0.21255
   1   6  -458028.69 2142.55   1 0.95395-0.88636-0.08370 0.46293-0.28803-0.00707
   1  -6  -455798.61 1853.72   1 0.80439-0.73673-0.45966 0.08055 0.37637-0.67136
  -1   6   454627.93 1817.66   1-0.41484 0.34705-0.39952 0.77880 0.81748-0.52251
   1   6  -452782.83 1755.15   1-0.35927 0.42701 0.77686-0.39759 0.51710-0.81214
  -1   6   456355.05 2068.48   1 0.92385-0.99190 0.34086 0.03859 0.17409 0.12094
   1   6  -458000.70 2069.58   1 0.78863-0.72087 0.47409-0.09507 0.39151-0.68651
  -1   6   456575.21 1974.03   1 0.82455-0.89216 0.01729 0.36182 0.56552-0.27042
   1   6  -316688.95 1408.94   1 0.95548-0.88198-0.08819 0.46741-0.28156 0.06023
   1  -6  -315115.02  518.80   1 0.48979-0.41597-0.55719 0.17784 0.67054-0.89181
  -1   6   312953.67  455.79   1-0.62620 0.55269-0.28371 0.66284 0.72620-0.50514
  -1  -6   314318.62  515.52   1-0.99818 0.92481-0.05711-0.32212 0.01884 0.20237
   1   6  -312831.67  470.42   1-0.62564 0.69908 0.64139-0.26226 0.44405-0.66521
  -1   6   312947.23  687.90   1 0.92425-0.99808 0.34004 0.03940 0.17355 0.04772
   1   6  -312825.72  641.06   1 0.81699-0.74340 0.36380 0.01526 0.44739-0.66867
  -1   6   313368.02  554.92   1 0.83322-0.90675 0.10610 0.27301 0.54266-0.32133
   1   6  -214403.03  556.46   1 0.95429-0.87489-0.08470 0.46393-0.28659 0.13904
   1  -6  -214228.64  439.48   1 0.05200 0.02758-0.54182 0.16257 0.83887-0.98631
  -1   6   213056.42  411.61   1-0.77054 0.69116-0.17319 0.55237 0.61340-0.46602
  -1  -6   215666.05 1114.78   1-0.99830 0.91900 0.00474-0.38398 0.05807 0.08940
   1   6  -213289.74  459.09   1-0.75597 0.83530 0.53267-0.15354 0.38046-0.52790
  -1   6   212249.95  553.85   1 0.91942-0.99903 0.34967 0.02978 0.17994-0.03242
  -1   6   214656.56  558.68   1 0.83470-0.91420 0.20230 0.17676 0.51219-0.36467
   1   6  -1186753.4 4428.37   1 0.94791-0.86259-0.06743 0.44666-0.31130 0.23752
  -1  -6   1146860.4 3499.39   1 0.90753-0.99281-0.37287-0.00623 0.19325-0.11950
   1  -6  -1151185.9 3573.28   1-0.31634 0.40168-0.44090 0.06163 0.83995-0.91370
  -1   6   1176638.5 4155.37   1-0.85539 0.77014-0.08529 0.46447 0.51089-0.43720
  -1  -6   1147228.2 3753.93   1-0.99662 0.91140 0.03226-0.41150 0.07542-0.00168
  -1   6   1177817.7 4277.89   1 0.90719-0.99257 0.37266 0.00679 0.19524-0.12147
  -1   6   1185406.5 4432.54   1 0.82713-0.91253 0.30023 0.07884 0.47509-0.40133
   1   6  -1183732.9 4429.93   1 0.83408-0.74871 0.12316 0.25595 0.53771-0.61148
   1  -6   016080.23  508.97   1 0.90430-0.81307 0.01695-0.39617-0.42655 0.42655
  -1  -6   015574.32  478.38   1 0.87173-0.96288-0.41012 0.03100 0.26811-0.26811
   1  -6   015771.62  553.23   1-0.54708 0.63827-0.33213-0.04713 0.76836-0.76836
  -1  -6   018919.66 1493.00   1-0.99607 0.90492 0.03882-0.41806 0.07955-0.07955
  -1  -6  -1 6015.71  214.89   1 0.75112-0.84819-0.48795 0.10870 0.44464-0.51841
   1  -6   1 6280.29  316.47   1-0.67773 0.77478-0.24810-0.13102 0.69218-0.61850
  -1  -6  -1 6245.38  248.10   1-0.84882 0.75179-0.09309-0.28607 0.52041-0.59410
  -1   6  -1 4517.07  302.34   1-0.99874 0.90166-0.04073 0.41998 0.02926-0.10300
  -1  -6  -1 7486.27  905.45   1-0.99670 0.89962 0.03134-0.41059 0.07485-0.14859
  -1   6  -1 3338.31  263.11   1 0.83945-0.93637 0.47500-0.09555 0.26397-0.33773
  -1   6  -1 3897.78  354.29   1 0.78490-0.88203 0.48525-0.10623 0.38529-0.45904
   1   6   1 3783.92  345.32   1 0.79979-0.70258-0.11068 0.48980 0.58998-0.51620
   1  -6   2117022.3 2894.39   1-0.75095 0.85388-0.19026-0.18886 0.63235-0.48497
  -1  -6  -2111382.0 2789.01   1-0.99786 0.89486 0.01388-0.39313 0.06385-0.21133
  -1   6  -297470.93 2363.56   1-0.99891 0.89591-0.02332 0.40257 0.04031-0.18779
  -1   6  -2111075.4 2693.77   1 0.75873-0.86152 0.56432-0.18485 0.32534-0.47286
  -1   6  -2105910.8 2658.55   1 0.75196-0.85497 0.56725-0.18823 0.33580-0.48330
   1   6   2106856.3 2716.11   1 0.76958-0.66654-0.21123 0.59049 0.60258-0.45501
   1  -6   3109258.0 3367.39   1-0.79245 0.90125-0.15273-0.22643 0.59050-0.36941
  -1   6  -3105134.4 3173.76   1-0.99720 0.88828 0.02454 0.35470 0.07056-0.29178
  -1  -6  -3110154.7 3412.52   1-0.99878 0.88985-0.01099-0.36824 0.04812-0.26934
  -1   6  -3111373.7 3323.38   1 0.60787-0.71646 0.68142-0.30195 0.40761-0.62888
  -1   6  -3113423.5 3505.89   1 0.71340-0.82207 0.64031-0.26117 0.28470-0.50593
   1   6   3114951.4 3539.15   1 0.73690-0.62798-0.29638 0.67563 0.60756-0.38620
   1  -6   424176.60 1102.75   1-0.81551 0.93020-0.12970-0.24946 0.56400-0.26922
  -1  -6  -427615.39 1182.25   1-0.99872 0.88387-0.04160-0.33764 0.02871-0.32367
  -1   6  -422476.59 1079.18   1-0.98392 0.86929 0.12381 0.25502 0.12867-0.42343
  -1   6  -424014.40  851.75   1 0.31110-0.42577 0.80652-0.42699 0.50271-0.79773
   1   6   423605.97 1025.05   1 0.70533-0.59054-0.36470 0.74395 0.60785-0.31271
   1  -6   594575.50 3239.73   1-0.82740 0.94797-0.11714-0.26202 0.54925-0.18077
  -1  -6  -589784.07 3063.23   1-0.99703 0.87626-0.07673-0.30251 0.00633-0.37503
  -1   6  -5108547.1 3455.19   1-0.85288 0.73245 0.41929-0.04035 0.31109-0.67961
  -1   6  -5107757.1 3426.68   1-0.35842 0.23789 0.77716-0.39788 0.51725-0.88605
  -1   6  -5107940.5 3631.89   1 0.62165-0.74197 0.76193-0.38279 0.18167-0.55039
   1   6   5110153.6 3679.44   1 0.67711-0.55681-0.41671 0.79585 0.60651-0.23784
   1  -6   649423.68 1995.66   1-0.83192 0.95837-0.11223-0.26694 0.54342-0.10125
  -1  -6  -651038.00 2059.27   1-0.99313 0.86643-0.11551-0.26373-0.01849-0.42394
  -1   6  -658728.05 2316.80   1 0.57084-0.69702 0.81068-0.43166 0.13010-0.57255
   1   6   661484.65 2373.80   1 0.65554-0.52942-0.45375 0.83289 0.60362-0.16122
   1  -6   7 3765.99  749.20   1-0.83117 0.96351-0.11305-0.26612 0.54439-0.02853
  -1   6  -7  690.70  286.42   1 0.51708-0.64908 0.85224-0.47323 0.07940-0.59560
   1   6   7 1286.41  456.33   1 0.64080-0.50886-0.47750 0.85663 0.60113-0.08499
   1  -6   8 7964.37 1167.47   1-0.82635 0.96458-0.11828-0.26089 0.55059 0.03896
  -1   6  -8 8359.16 1121.45   1 0.46095-0.59878 0.88693-0.50792 0.02931-0.61924
   1   6   8 7283.76  941.94   1 0.63304-0.49528-0.48953 0.86867 0.59967-0.00980
   1  -6   926343.25 2035.54   1-0.81813 0.96224-0.12699-0.25218 0.56083 0.10241
  -1   6  -921808.15 2101.16   1 0.40329-0.54701 0.91483-0.53587-0.02056-0.64313
   1   6   926048.47 1932.52   1 0.63202-0.48844-0.49109 0.87023 0.59947 0.06412
   1  -6  10 7082.42 1036.93   1-0.80688 0.95687-0.13853-0.24064 0.57424 0.16270
  -1   6 -10 2048.45  559.33   1 0.34293-0.49248 0.93679-0.55782-0.06938-0.66804
   1   6  10 1873.80  391.52   1 0.63730-0.48790-0.48296 0.86210 0.60048 0.13684
   1  -6  11 2117.84  929.08   1-0.79278 0.94866-0.15242-0.22675 0.59014 0.22049
   1   6  11  767.91  371.31   1 0.92406-0.76941 0.34042 0.03902 0.17380 0.63756
  -1   6 -11  736.20  403.34   1 0.28046-0.43584 0.95262-0.57366-0.11767-0.69350
  -1   7  10 8193.92 1163.83   1 0.84452-0.87793 0.46843-0.02573 0.25952 0.47808
   1   7 -10 8107.92 1108.79   1 0.47892-0.44598 0.87669-0.43451 0.04506-0.78249
   1   7  -910134.20  938.79   1 0.90727-0.86923 0.01223 0.43019-0.42035-0.24364
  -1   7   9 9627.86 1037.51   1 0.86623-0.90542 0.43856 0.00413 0.23936 0.42448
   1   7  -911479.74  949.49   1 0.54527-0.50650 0.83157-0.38939 0.10561-0.76930
   1   7  -8 1279.94  436.22   1 0.91746-0.87350-0.00473 0.44716-0.39779-0.19242
  -1   7   8 1012.75  446.31   1 0.88404-0.92900 0.41168 0.03100 0.22131 0.36876
   1   7  -8 1264.87  439.74   1 0.60701-0.56242 0.77715-0.33497 0.16602-0.75595
  -1   7   8  870.19  285.97   1 0.80604-0.84997-0.08449 0.52680 0.58579 0.00440
   1   7  -719836.93 1425.95   1 0.92574-0.87588-0.01968 0.46211-0.37762-0.13882
  -1   7   720138.50 1547.77   1 0.89824-0.94898 0.38836 0.05432 0.20571 0.31060
   1   7  -719315.37 1361.31   1 0.66314-0.61270 0.71352-0.27120 0.22612-0.74232
  -1   7   720801.95 1375.05   1 0.81077-0.86063-0.06267 0.50498 0.58198-0.06556
   1   7  -664025.94 3346.18   1 0.93216-0.87638-0.03213 0.47456-0.36061-0.08205
   1  -7  -653477.05 2646.72   1 0.97324-0.91751-0.17760-0.26483-0.14575-0.29668
  -1   7   654405.70 2920.45   1 0.90905-0.96556 0.36928 0.07341 0.19298 0.24957
   1   7  -659032.43 3041.76   1 0.71348-0.65722 0.64017-0.19785 0.28480-0.72726
  -1   7   654524.82 2765.84   1 0.81777-0.87355-0.02610 0.46840 0.57494-0.13229
   1   7  -5 -129.82   54.33   1 0.82409-0.76180 0.49413-0.05143 0.27695-0.64575
   1   7  -426110.19 1074.22   1 0.93886-0.87127-0.04619 0.48862-0.34116 0.04605
   1  -7  -427383.98  921.03   1 0.79000-0.72232-0.46806 0.02561 0.39599-0.69108
  -1   7   422517.20  776.67   1-0.69706 0.62943-0.23374 0.67605 0.67783-0.38308
   1   7  -421771.48  769.46   1-0.48226 0.54978 0.72548-0.28306 0.49101-0.78588
  -1   7   422325.02  987.74   1 0.92055-0.98860 0.34746 0.09523 0.17847 0.11656
   1   7  -424296.36 1084.78   1 0.79086-0.72309 0.46720-0.02501 0.39529-0.69029
  -1   7   424404.96  982.04   1 0.83188-0.89949 0.08616 0.35613 0.54821-0.25311
   1   7  -376501.08 2649.71   1 0.93823-0.86473-0.04481 0.48724-0.34308 0.12175
   1  -7  -394379.53 3099.01   1 0.43278-0.35895-0.56269 0.12012 0.70432-0.92559
  -1   7   374140.57 2450.35   1-0.80694 0.73345-0.13846 0.58083 0.57416-0.35308
   1   7  -368861.71 2309.53   1-0.67312 0.74655 0.60613-0.16381 0.42368-0.64484
  -1   7   381213.90 2923.75   1 0.92067-0.99450 0.34721 0.09547 0.17831 0.04296
   1   7  -376442.79 2667.35   1 0.81608-0.74244 0.36916 0.07302 0.44466-0.66591
  -1   7   377710.92 2665.42   1 0.83511-0.90871 0.15794 0.28430 0.52691-0.30563
   1   7  -227052.24  976.07   1 0.93306-0.85365-0.03395 0.47638-0.35811 0.21055
  -1   7   225909.79  838.50   1-0.87125 0.79188-0.06553 0.50790 0.48643-0.33904
  -1  -7   236335.82 1212.92   1-0.99744 0.91814-0.07075-0.37169 0.01014 0.13732
  -1   7   224837.38 1082.43   1 0.91598-0.99558 0.35634 0.08635 0.18438-0.03685
  -1   7   225390.79  968.98   1 0.83316-0.91266 0.23578 0.20647 0.50024-0.35272
   1   7  -225101.01  974.10   1 0.83080-0.75130 0.26651 0.17573 0.48860-0.63612
   1  -7  -126689.36  875.96   1 0.90918-0.82387 0.00915-0.45157-0.41628 0.34250
   1   7  -125708.67  903.66   1 0.91896-0.83364-0.00736 0.44979-0.39427 0.32049
   1  -7  -128859.32  958.76   1-0.32412 0.40946-0.43788-0.00459 0.83857-0.91231
  -1  -7   129646.09 1087.37   1-0.99879 0.91357-0.03802-0.40442 0.03098 0.04275
  -1   7   125360.62 1003.72   1 0.90468-0.99005 0.37716 0.06553 0.19824-0.12448
  -1   7   128253.93 1053.74   1 0.82491-0.91031 0.31673 0.12552 0.46818-0.39442
   1   7  -129954.09 1164.42   1 0.83515-0.74974 0.16192 0.28033 0.52564-0.59940
   1  -7   073081.67 2235.70   1 0.93495-0.84372-0.03783-0.40458-0.35275 0.35275
  -1  -7   078361.28 2365.10   1 0.87165-0.96281-0.41018-0.03210 0.26825-0.26825
   1  -7   080776.62 2475.33   1-0.53243 0.62362-0.34036-0.10211 0.77502-0.77502
  -1  -7   081104.64 2456.05   1-0.88406 0.79291-0.04842-0.39394 0.46485-0.46485
  -1  -7   084382.43 2661.29   1-0.99891 0.90776-0.02483-0.41762 0.03936-0.03936
  -1   7   078818.92 2490.06   1 0.88344-0.97459 0.41262 0.03006 0.22194-0.22194
  -1   7   080870.07 2547.84   1 0.80993-0.90119 0.39767 0.04451 0.43112-0.43112
   1   7   081633.68 2572.18   1 0.82953-0.73823 0.05936 0.38294 0.55529-0.55529
  -1  -7  -173593.31 2194.16   1 0.77286-0.86992-0.47729 0.03484 0.41817-0.49194
   1  -7   174401.00 2310.77   1-0.65552 0.75257-0.26389-0.17841 0.70756-0.63387
  -1  -7  -174162.00 2214.44   1-0.77446 0.67743-0.16962-0.27274 0.60945-0.68314
  -1  -7  -177023.14 2469.99   1-0.99891 0.90184-0.02536-0.41708 0.03902-0.11276
  -1   7  -170272.02 2211.47   1 0.84610-0.94302 0.46635-0.02365 0.25811-0.33187
  -1   7  -169330.13 2214.17   1 0.78797-0.88510 0.47611-0.03392 0.39039-0.46414
   1   7   167234.60 2178.04   1 0.81571-0.71849-0.03756 0.47987 0.57723-0.50346
   1  -7   230674.76 1091.25   1-0.72788 0.83082-0.20954-0.23277 0.65289-0.50551
  -1  -7  -232733.38 1205.39   1-0.99883 0.89583-0.03603-0.40642 0.03225-0.17973
  -1   7  -226910.90  959.94   1 0.78062-0.88341 0.54251-0.09979 0.31032-0.45783
  -1   7  -224440.61  979.85   1 0.75963-0.86263 0.55027-0.10808 0.34663-0.49413
   1   7   227630.96 1068.33   1 0.79602-0.69289-0.12535 0.56765 0.59214-0.44459
   1  -7   324347.67 1026.86   1-0.77080 0.87960-0.17295-0.26941 0.61314-0.39206
  -1  -7  -324927.61 1121.77   1-0.99830 0.88938-0.05444-0.38800 0.02054-0.24176
  -1   7  -327438.49 1044.91   1-0.98754 0.87880 0.10520 0.33677 0.11697-0.33804
  -1   7  -329879.48 1088.09   1 0.66466-0.77325 0.64309-0.20037 0.38032-0.60159
  -1   7  -328061.85 1138.02   1 0.72602-0.83470 0.61852-0.17620 0.30052-0.52175
   1   7   330473.75 1219.77   1 0.77295-0.66403-0.20128 0.64374 0.60169-0.38032
   1  -7   448432.08 1837.00   1-0.79577 0.91045-0.14952-0.29284 0.58684-0.29206
  -1  -7  -447648.86 1763.88   1-0.99686 0.88201-0.07896-0.36348 0.00490-0.29986
  -1   7  -448934.97 1791.49   1-0.96267 0.84803 0.20348 0.23850 0.17847-0.47323
  -1   7  -457877.81 1918.18   1 0.44876-0.56332 0.76188-0.31909 0.46705-0.76212
  -1   7  -459129.33 2145.35   1 0.68705-0.80155 0.68105-0.23873 0.25322-0.54819
   1   7   457082.87 2061.02   1 0.74999-0.63520-0.26443 0.70690 0.60627-0.31113
  -1   7  -5  -99.17   48.74   1-0.00232-0.11824 0.84128-0.39870 0.54059-0.90942
   1  -7   636879.62 2186.89   1-0.81555 0.94201-0.12967-0.31269 0.56396-0.12179
  -1   7  -634033.62 1986.17   1 0.59706-0.72323 0.78688-0.34470 0.15596-0.59842
   1   7   633391.63 1928.27   1 0.71195-0.58540-0.35123 0.79369 0.60807-0.16535
  -1   7  -731369.74 1823.75   1 0.54683-0.67883 0.83036-0.38817 0.10709-0.62329
   1   7   733834.35 1922.82   1 0.69875-0.56681-0.37633 0.81866 0.60836-0.09223
   1  -7   823334.94 2046.23   1-0.81242 0.95065-0.13289-0.30947 0.56771 0.02184
  -1   7  -816998.69 1489.68   1 0.49371-0.63153 0.86767-0.42549 0.05822-0.64816
   1   7   815611.21 1380.48   1 0.69158-0.55382-0.39010 0.83243 0.60788-0.01801
   1  -7   9 5872.34 1368.98   1-0.80517 0.94928-0.14024-0.30212 0.57621 0.08703
  -1   7  -9 5456.80 1558.86   1 0.43852-0.58224 0.89867-0.45654 0.00903-0.67272
   1   7   9 7184.71 1604.25   1 0.68982-0.54624-0.39343 0.83576 0.60774 0.05585
   1  -7  10 7054.41 1051.64   1-0.79477 0.94477-0.15048-0.29188 0.58794 0.14899
  -1   7 -10 9944.51 1942.88   1 0.38020-0.52975 0.92405-0.48193-0.03950-0.69792
  -1  -8  10 3508.26 1119.95   1-0.88187 0.84958-0.05143-0.45413 0.46867 0.26827
  -1   8  10 3878.74 1136.22   1 0.84424-0.87766 0.46879 0.03714 0.25976 0.47784
   1   8 -10 2829.34  790.70   1 0.50590-0.47296 0.85980-0.35445 0.06921-0.80663
  -1  -8   9  877.53  585.84   1-0.89364 0.85546-0.03482-0.47074 0.44742 0.21582
  -1   8   9 1328.35  493.77   1 0.86463-0.90382 0.44086 0.06507 0.24091 0.42292
   1   8  -9  364.95  340.11   1 0.56774-0.52898 0.81333-0.30798 0.12709-0.79077
   1   8  -830320.28 2300.06   1 0.90281-0.85886 0.01926 0.48636-0.42959-0.16062
  -1   8   828148.87 2201.29   1 0.88132-0.92628 0.41594 0.08999 0.22417 0.36591
   1   8  -829561.52 2216.61   1 0.62429-0.57968 0.75910-0.25359 0.18443-0.77437
   1   8  -739527.14 2148.87   1 0.91051-0.86065 0.00698 0.49865-0.41340-0.10303
  -1   8   737296.91 2087.37   1 0.89459-0.94533 0.39453 0.11140 0.20984 0.30648
   1   8  -739284.62 2026.52   1 0.67580-0.62536 0.69680-0.19129 0.24031-0.75651
  -1   8   737555.12 1879.46   1 0.82549-0.87534 0.02433 0.48116 0.56388-0.04746
   1   8  -6  535.57  384.85   1 0.91610-0.86033-0.00239 0.50802-0.40093-0.04173
  -1   8   6 1720.17  653.89   1 0.90462-0.96113 0.37726 0.12867 0.19830 0.24425
   1   8  -6  809.04  441.83   1 0.72123-0.66497 0.62698-0.12147 0.29446-0.73691
  -1   8   6   72.21  213.20   1 0.82893-0.88470 0.05353 0.45195 0.55677-0.11412
   1   8  -514738.20 1579.74   1 0.91933-0.85765-0.00801 0.51364-0.39340 0.02451
   1  -8  -5 9242.93  920.53   1 0.96940-0.90771-0.24175-0.26385-0.04249-0.32623
   1   8  -513730.32 1377.74   1 0.82912-0.76683 0.48800 0.01793 0.27278-0.64158
  -1   8   515988.79 1756.54   1 0.91144-0.97373 0.36488 0.14105 0.19005 0.17874
   1   8  -515346.03 1676.17   1 0.75943-0.69753 0.55072-0.04536 0.34635-0.71510
  -1   8   515435.93 1618.92   1 0.83247-0.89416 0.09427 0.41121 0.54598-0.17710
   1   8  -444596.01 1799.80   1 0.91967-0.85208-0.00861 0.51424-0.39259 0.09747
   1   8  -437342.13 1382.52   1-0.54616 0.61368 0.69174-0.18612 0.47243-0.76729
  -1   8   440458.57 1703.60   1 0.91493-0.98298 0.35834 0.14759 0.18571 0.10933
   1   8  -444581.16 1790.24   1 0.79065-0.72288 0.46784 0.03751 0.39494-0.68994
  -1   8   444919.67 1741.63   1 0.83489-0.90259 0.14528 0.36014 0.53088-0.23584
   1   8  -313435.14  704.19   1 0.91597-0.84247-0.00217 0.50780-0.40122 0.17989
   1  -8  -315381.92  567.00   1 0.91083-0.83733 0.00645-0.51209-0.41271 0.19138
   1  -8  -317171.48  617.75   1 0.39906-0.32535-0.56453 0.05871 0.72253-0.94376
  -1   8   315236.28  828.08   1 0.91466-0.98849 0.35884 0.14709 0.18604 0.03523
   1   8  -313944.12  789.19   1 0.81379-0.74014 0.38029 0.12506 0.43945-0.66071
  -1   8   312455.92  648.03   1 0.83464-0.90824 0.20407 0.30135 0.51158-0.29030
   1   8  -270529.17 2395.91   1 0.90571-0.82631 0.01471 0.49091-0.42362 0.27606
   1  -8  -264686.54 2127.96   1 0.92980-0.85039-0.02744-0.47818-0.36704 0.21948
   1  -8  -267988.97 2230.94   1-0.01241 0.09200-0.52979 0.02412 0.84803-0.99546
  -1   8   268026.52 2449.03   1 0.90982-0.98942 0.36788 0.13805 0.19205-0.04453
   1   8  -271980.85 2494.00   1 0.82835-0.74885 0.29008 0.21534 0.47924-0.62676
  -1   8   269532.01 2397.44   1 0.83059-0.91009 0.26878 0.23664 0.48771-0.34019
   1  -8  -1159155.6 5224.80   1 0.94441-0.85909-0.05884-0.44678-0.32344 0.24966
   1  -8  -1196321.7 6306.07   1-0.31559 0.40094-0.44119-0.06450 0.84008-0.91383
  -1  -8   1199367.7 6473.08   1-0.99507 0.90985-0.09881-0.40684-0.00778 0.08152
  -1   8   1185360.2 6193.12   1 0.89885-0.98422 0.38733 0.11860 0.20502-0.13126
  -1   8   1189560.7 6176.12   1 0.82177-0.90717 0.33712 0.16830 0.45938-0.38562
   1   8  -1197435.9 6458.21   1 0.83479-0.74939 0.19916 0.30626 0.51328-0.58704
  -1  -8   066654.81 2244.70   1 0.86413-0.95529-0.41679-0.08868 0.28204-0.28204
  -1  -8   068482.83 2315.06   1-0.83324 0.74210-0.11078-0.39478 0.54169-0.54169
  -1  -8   070495.11 2479.03   1-0.99667 0.90552-0.08138-0.42427 0.00336-0.00336
  -1   8   069536.29 2448.83   1 0.87900-0.97015 0.41953 0.08640 0.22658-0.22658
  -1   8   069166.99 2457.62   1 0.80776-0.89902 0.40679 0.09856 0.42665-0.42665
   1   8   070844.26 2506.43   1 0.83346-0.74217 0.11046 0.39502 0.54141-0.54141
  -1  -8  -1 3424.25  197.32   1 0.77363-0.87069-0.47689-0.02876 0.41720-0.49097
   1  -8   1 4812.50  427.92   1-0.62824 0.72529-0.28237-0.22312 0.72496-0.65127
  -1  -8  -1 3739.48  226.15   1-0.69995 0.60290-0.23154-0.27396 0.67561-0.74929
  -1  -8  -1 2785.55  323.94   1-0.99701 0.89993-0.07702-0.42863 0.00615-0.07988
  -1   8  -1 2589.62  331.40   1 0.84538-0.94230 0.46730 0.03863 0.25875-0.33251
  -1   8  -1 3227.82  378.18   1 0.78805-0.88519 0.47586 0.02949 0.39053-0.46428
   1   8   1 2108.06  381.69   1 0.82576-0.72855 0.02645 0.47904 0.56339-0.48961
   1  -8   219882.62  880.64   1-0.70101 0.80395-0.23073-0.27477 0.67479-0.52741
  -1  -8  -219531.69  939.90   1-0.99658 0.89358-0.08259-0.42307 0.00259-0.15007
  -1   8  -212695.75  595.16   1 0.78881-0.89160 0.53394-0.02797 0.30443-0.45195
  -1   8  -213674.52  702.01   1 0.76288-0.86588 0.54274-0.03738 0.35133-0.49883
   1   8   213599.14  719.56   1 0.81327-0.71014-0.05033 0.55582 0.57970-0.43214
   1  -8   3 8670.76  647.99   1-0.74574 0.85456-0.19470-0.31079 0.63714-0.41607
  -1  -8  -3 9615.53  609.60   1-0.99536 0.88644-0.09594-0.40971-0.00594-0.21527
  -1   8  -3 8979.54  469.23   1 0.69317-0.80177 0.62146-0.11549 0.36509-0.58636
  -1   8  -3 8258.40  641.32   1 0.73294-0.84162 0.60583-0.10032 0.30944-0.53066
   1   8   3 8317.37  547.45   1 0.79794-0.68889-0.11797 0.62346 0.59107-0.36974
   1  -8   418740.79  961.25   1-0.77305 0.88773-0.17091-0.33465 0.61088-0.31610
  -1  -8  -421456.65 1082.93   1-0.99313 0.87828-0.11554-0.39011-0.01851-0.27644
  -1   8  -413032.41  983.17   1-0.93981 0.82518 0.26449 0.24062 0.21629-0.51105
  -1   8  -417166.59  713.19   1 0.52380-0.63837 0.72826-0.22221 0.44187-0.73695
  -1   8  -418452.29  905.67   1 0.69787-0.81237 0.66502-0.15951 0.26592-0.56089
   1   8   416446.06  896.51   1 0.78138-0.66658-0.17500 0.68068 0.59900-0.30386
   1  -8   548824.17 2796.53   1-0.78877 0.90934-0.15626-0.34930 0.59449-0.22602
  -1   8  -549841.32 2664.98   1 0.19564-0.31617 0.82953-0.32349 0.52306-0.89184
  -1   8  -549064.38 2800.39   1 0.65846-0.77879 0.71944-0.21393 0.22096-0.58967
   1   8   548449.13 2738.82   1 0.76610-0.64543-0.22125 0.72692 0.60342-0.23449
   1  -8   653416.41 3370.42   1-0.79658 0.92303-0.14873-0.35683 0.58594-0.14378
  -1   8  -654718.84 3423.92   1 0.61540-0.74157 0.76863-0.26328 0.17459-0.61704
   1   8   657084.18 3541.18   1 0.75312-0.62657-0.25641 0.76209 0.60584-0.16312
   1  -8   7 2072.31  504.34   1-0.79860 0.93094-0.14675-0.35880 0.58369-0.06783
  -1   8  -7 2182.58  417.03   1 0.56853-0.70053 0.81266-0.30731 0.12785-0.64405
   1   8   7 2001.41  342.07   1 0.74343-0.61101-0.28075 0.78642 0.60702-0.09051
   1  -8   8 7537.19 1388.80   1-0.79611 0.93433-0.14919-0.35637 0.58647 0.00308
  -1   8  -8 9957.41  991.03   1 0.51841-0.65624 0.85132-0.34597 0.08062-0.67056
   1   8   8 6984.53 1568.51   1 0.73764-0.59934-0.29463 0.80030 0.60751-0.01721
   1  -8   913452.23 1507.68   1-0.78988 0.93399-0.15520-0.35036 0.59329 0.06995
  -1   8  -915267.12 1646.52   1 0.46524-0.60890 0.88456-0.37921 0.03305-0.69673
   1   8   915567.07 1635.71   1 0.73604-0.59186-0.29837 0.80405 0.60762 0.05645
   1  -8  10 9392.28 1264.89   1-0.78037 0.93037-0.16416-0.34140 0.60337 0.13357
  -1   8 -1011201.22 2424.46   1 0.40979-0.55934 0.91205-0.40676-0.01516-0.72226
  -1  -9   9 6801.85  826.64   1-0.87721 0.83904-0.05771-0.51105 0.47661 0.18663
  -1   9   910958.15 1228.47   1 0.86050-0.89969 0.44672 0.12245 0.24486 0.41898
   1   9  -911014.50 1105.98   1 0.58350-0.54473 0.79951-0.23099 0.14248-0.80616
  -1  -9   8 4390.20  946.83   1-0.88632 0.84226-0.04528-0.52347 0.46084 0.12870
  -1   9   8 5220.42 1025.00   1 0.87629-0.92125 0.42368 0.14550 0.22936 0.36072
   1   9  -8 5199.79  947.82   1 0.63596-0.59135 0.74623-0.17753 0.19668-0.78662
  -1  -9   734111.03 2559.45   1-0.89318 0.84323-0.03549-0.53327 0.44828 0.06757
  -1   9   730847.77 2315.44   1 0.88878-0.93952 0.40410 0.16507 0.21624 0.30008
   1   9  -733067.44 2466.17   1 0.68339-0.63296 0.68626-0.11756 0.24900-0.76520
  -1   9   728603.01 2067.59   1 0.83282-0.88267 0.09954 0.46914 0.54451-0.02809
  -1   9   635736.44 2048.79   1 0.89813-0.95464 0.38856 0.18061 0.20584 0.23671
   1   9  -633937.18 1799.35   1 0.72501-0.66875 0.62033-0.05164 0.29923-0.74169
  -1   9   631374.86 1608.75   1 0.83405-0.88982 0.12244 0.44624 0.53792-0.09527
  -1   9   518033.13 1348.17   1 0.90435-0.96663 0.37774 0.19144 0.19862 0.17017
   1   9  -521150.28 1494.21   1 0.75992-0.69803 0.54959 0.01893 0.34706-0.71581
  -1   9   520849.21 1375.93   1 0.83508-0.89688 0.15582 0.41278 0.52758-0.15878
   1   9  -4 4708.76  478.02   1 0.92045-0.85239 0.34765 0.22152 0.17860-0.47365
   1   9  -4 4035.60  563.62   1 0.78866-0.72089 0.47400 0.09452 0.39155-0.68656
  -1   9   4 4941.74  586.60   1 0.83483-0.90252 0.19767 0.37093 0.51379-0.21875
   1  -9  -314289.48 1433.19   1 0.38844-0.31473-0.56499-0.00404 0.72793-0.94917
  -1  -9   314377.62 1531.98   1-0.88976 0.81627-0.04041-0.52834 0.45462-0.23353
  -1   9   330187.25 1829.29   1 0.90657-0.98039 0.37378 0.19539 0.19599 0.02529
  -1   9   324369.38 1367.89   1 0.83242-0.90602 0.24678 0.32182 0.49614-0.27486
   1  -9  -219519.88  985.19   1 0.96245-0.88301-0.11040-0.45845-0.24797 0.10049
   1  -9  -224536.61  946.98   1-0.01019 0.08978-0.53024-0.03863 0.84778-0.99521
  -1  -9   223481.58 1036.83   1-0.87388 0.79450-0.06211-0.50664 0.48215-0.33476
  -1   9   231574.19 1488.66   1 0.90138-0.98098 0.38295 0.18622 0.20210-0.05458
   1   9  -230194.71 1312.85   1 0.82512-0.74562 0.31526 0.25334 0.46881-0.61633
  -1   9   230588.73 1322.87   1 0.82697-0.90647 0.30149 0.26711 0.47457-0.32705
   1  -9  -1 1788.55  247.26   1-0.29453 0.37988-0.44915-0.11975 0.84350-0.91725
  -1  -9   1 2233.02  324.87   1-0.84226 0.75700-0.10067-0.46809 0.52957-0.45588
  -1   9   1 1003.98  540.03   1 0.89037-0.97574 0.40152 0.16765 0.21451-0.14075
  -1   9   1 1855.49  380.62   1 0.81771-0.90311 0.36005 0.20855 0.44910-0.37534
   1   9  -1 2105.38  612.31   1 0.83319-0.74779 0.23527 0.33333 0.50042-0.57418
  -1  -9   029592.75 1128.44   1 0.85048-0.94164-0.42797-0.14069 0.30579-0.30579
   1  -9   033747.02 1319.95   1-0.47924 0.57043-0.36858-0.20032 0.79653-0.79653
  -1  -9   033062.66 1272.44   1-0.77716 0.68601-0.16714-0.40161 0.60669-0.60669
  -1   9   026118.70 1204.69   1 0.87114-0.96229 0.43139 0.13778 0.23454-0.23454
  -1   9   028458.79 1252.30   1 0.80427-0.89553 0.42069 0.14783 0.41971-0.41971
   1   9   028048.63 1294.66   1 0.83510-0.74380 0.15754 0.41106 0.52704-0.52704
  -1  -9  -142987.47 1555.24   1 0.76055-0.85761-0.48346-0.08539 0.43338-0.50715
   1  -9   150932.80 1953.84   1-0.59628 0.69334-0.30282-0.26586 0.74346-0.66977
  -1  -9  -148539.30 1760.03   1-0.62395 0.52690-0.28519-0.28349 0.72756-0.80125
  -1   9  -155053.81 2150.85   1 0.83962-0.93655 0.47478 0.09439 0.26382-0.33758
  -1   9  -154982.01 2190.78   1 0.78605-0.88318 0.48187 0.08665 0.38719-0.46094
   1   9   157226.10 2253.37   1 0.83172-0.73451 0.08406 0.48461 0.54878-0.47501
  -1  -9  -211365.01 1120.07   1 0.29147-0.39436-0.56559-0.00344 0.77145-0.91894
   1  -9   217693.58 1839.25   1-0.67041 0.77335-0.25338-0.31530 0.69737-0.55000
  -1   9  -219023.03 1960.61   1 0.78842-0.89121 0.53434 0.03486 0.30471-0.45223
  -1   9  -220079.07 1772.54   1 0.76310-0.86611 0.54222 0.02630 0.35165-0.49915
   1   9   217523.04 1853.76   1 0.82444-0.72131 0.01654 0.55213 0.56569-0.41814
   1  -9   334579.98 1858.75   1-0.71753 0.82635-0.21785-0.35083 0.66157-0.44050
  -1   9  -332343.50 1695.85   1 0.70519-0.81378 0.61180-0.04259 0.35833-0.57960
  -1   9  -331239.35 1740.69   1 0.73588-0.84456 0.60026-0.03156 0.31329-0.53452
   1   9   330717.86 1753.83   1 0.81460-0.70555-0.04344 0.61212 0.57838-0.35705
   1  -9   441071.14 2373.90   1-0.74720 0.86190-0.19347-0.37522 0.63581-0.34105
  -1   9  -438568.48 2113.92   1 0.56399-0.67856 0.70716-0.13785 0.42641-0.72149
  -1   9  -438255.67 2230.77   1 0.70386-0.81836 0.65573-0.08703 0.27309-0.56806
   1   9   435224.98 2044.35   1 0.80365-0.68868-0.09480 0.66348 0.58749-0.29239
   1  -9   535601.66 2333.88   1-0.76524 0.88581-0.17795-0.39081 0.61865-0.25017
  -1   9  -530725.26 2027.91   1 0.66763-0.78795 0.70770-0.13901 0.23112-0.59983
   1   9   526454.39 1764.88   1 0.79254-0.67187-0.13665 0.70554 0.59429-0.22536
   1  -9   615848.70 1005.52   1-0.77493 0.90139-0.16918-0.39957 0.60897-0.16680
  -1   9  -615928.49 1043.22   1 0.62745-0.75359 0.75568-0.18699 0.18771-0.63017
   1   9   615803.64  942.55   1 0.78319-0.65665-0.16908 0.73796 0.59834-0.15561
   1  -9   713859.97 1296.01   1-0.77852 0.91087-0.16588-0.40288 0.60528-0.08942
  -1   9  -720236.46 1638.84   1 0.58386-0.71586 0.79918-0.23066 0.14284-0.65903
   1   9   716382.13 1357.11   1 0.77607-0.64365-0.19178 0.76066 0.60077-0.08426
   1  -9   8 9330.20 1121.14   1-0.77734 0.91557-0.16697-0.40179 0.60650-0.01695
  -1   9  -815261.89 1369.00   1 0.53655-0.67438 0.83822-0.26970 0.09742-0.68736
   1   9   814250.65 1209.87   1 0.77177-0.63347-0.20478 0.77367 0.60201-0.01171
   1  -9   9 1002.71  478.19   1-0.77221 0.91633-0.17167-0.39709 0.61172 0.05152
  -1   9  -9 1079.06  500.95   1 0.48595-0.62961 0.87247-0.30395 0.05130-0.71498
  -1 -10   9  691.48  414.84   1-0.85834 0.82017-0.08173-0.55023 0.50651 0.15673
  -1  10   9 1494.27  550.35   1 0.85417-0.89335 0.45551 0.17690 0.25079 0.41305
   1  10  -9  240.53  358.21   1 0.59396-0.55519 0.78983-0.15814 0.15286-0.81654
  -1 -10   8 6045.64  999.86   1-0.86664 0.82258-0.07143-0.56052 0.49378 0.09576
  -1  10   8 3412.55  940.28   1 0.86919-0.91415 0.43425 0.19816 0.23647 0.35361
   1  10  -8 7331.29 1007.53   1 0.64300-0.59839 0.73814-0.10625 0.20418-0.79412
  -1 -10   7 6913.59  838.08   1-0.87242 0.82247-0.06402-0.56793 0.48454 0.03132
  -1  10   7 5470.52 1042.85   1 0.88102-0.93175 0.41641 0.21600 0.22448 0.29183
   1  10  -7 8225.35  819.24   1 0.68715-0.63671 0.68091-0.04902 0.25333-0.76953
  -1 -10   6 1365.36  638.31   1-0.87536 0.81953-0.06016-0.57179 0.47969-0.03753
  -1  10   6 1217.90  467.14   1 0.88976-0.94627 0.40251 0.22991 0.21517 0.22739
   1  10  -6  436.29  370.41   1 0.72578-0.66952 0.61895 0.01293 0.30022-0.74267
  -1  10   6  366.94  290.52   1 0.83509-0.89098 0.18412 0.44765 0.51838-0.07582
  -1 -10   526572.09 1505.44   1-0.87487 0.81316-0.06080-0.57115 0.48050-0.11203
  -1  10   529187.74 1695.54   1 0.89541-0.95770 0.39316 0.23926 0.20892 0.15988
   1  10  -526654.20 1487.73   1 0.75825-0.69635 0.55341 0.07828 0.34465-0.71341
  -1  10   530164.84 1602.92   1 0.83440-0.89620 0.21093 0.42084 0.50918-0.14038
  -1 -10   427274.49 1618.80   1-0.86985 0.80224-0.06734-0.56461 0.48869-0.19391
   1  10  -424504.91 1351.02   1 0.89858-0.83052 0.38779 0.24463 0.20533-0.50037
  -1  10   425572.36 1637.77   1 0.89781-0.96587 0.38910 0.24331 0.20621 0.08883
   1  10  -423297.21 1410.93   1 0.78522-0.71745 0.48431 0.14738 0.38582-0.68083
  -1  10   423470.12 1377.71   1 0.83250-0.90019 0.24573 0.38605 0.49654-0.20150
  -1 -10   314140.82 1052.25   1-0.85823 0.78474-0.08186-0.55009 0.50668-0.28560
  -1  10   317808.59 1344.35   1 0.89655-0.97038 0.39124 0.24117 0.20763 0.01364
   1  10  -320597.79 1482.90   1 0.80617-0.73253 0.41322 0.21847 0.42346-0.64471
  -1  10   316383.51 1159.83   1 0.82868-0.90228 0.28720 0.34458 0.48040-0.25912
   1 -10  -229166.52 1598.16   1 0.00970 0.06987-0.53419-0.09789 0.84530-0.99274
  -1 -10   228110.11 1636.62   1-0.83605 0.75667-0.10767-0.52428 0.53798-0.39059
  -1  10   220397.45 1866.15   1 0.89090-0.97050 0.40066 0.23176 0.21393-0.06641
   1  10  -220674.70 1854.99   1 0.82102-0.74152 0.34160 0.29017 0.45740-0.60492
  -1  10   223110.93 1580.64   1 0.82228-0.90178 0.33400 0.29778 0.46074-0.31322
   1 -10  -130633.93 1699.68   1-0.26303 0.34837-0.46053-0.17158 0.84777-0.92151
  -1 -10   130408.21 1729.30   1-0.79503 0.70977-0.15024-0.48172 0.58766-0.51396
  -1  10   120025.45 1750.49   1 0.87957-0.96495 0.41865 0.21376 0.22599-0.15223
  -1  10   121685.41 1863.61   1 0.81283-0.89822 0.38473 0.24696 0.43734-0.36359
   1  10  -124313.34 1632.76   1 0.83042-0.74502 0.27057 0.36120 0.48701-0.56077
   1 -10   030620.00 1714.92   1-0.44277 0.53396-0.38651-0.24560 0.80904-0.80904
  -1 -10   033021.35 1833.06   1-0.71578 0.62462-0.21924-0.41263 0.66300-0.66300
  -1  10   025867.91 1569.69   1 0.86046-0.95160 0.44679 0.18562 0.24491-0.24491
  -1  10   028574.38 1691.35   1 0.79961-0.89087 0.43796 0.19373 0.41086-0.41086
   1  10   027334.37 1674.37   1 0.83471-0.74341 0.20186 0.42992 0.51234-0.51234
  -1 -10  -128009.24 1542.67   1-0.54340 0.44636-0.33422-0.29789 0.77006-0.84380
   1 -10   128091.50 1632.67   1-0.55980 0.65684-0.32482-0.30730 0.76230-0.68856
  -1  10  -129105.39 1736.30   1 0.83003-0.92695 0.48687 0.14555 0.27201-0.34577
  -1  10  -131711.87 1909.24   1 0.78241-0.87954 0.49244 0.13925 0.38122-0.45497
   1  10   131866.99 1939.86   1 0.83467-0.73747 0.13698 0.49480 0.53343-0.45967
   1 -10   272631.49 3958.93   1-0.63607 0.73901-0.27717-0.35470 0.72012-0.57275
  -1  10  -281613.83 4428.51   1 0.78205-0.88485 0.54103 0.09142 0.30930-0.45681
  -1  10  -281508.34 4480.69   1 0.76106-0.86406 0.54699 0.08470 0.34869-0.49619
   1  10   285398.71 5219.19   1 0.83118-0.72805 0.07734 0.55452 0.55059-0.40304
   1 -10   336996.17 2332.26   1-0.68597 0.79479-0.24205-0.38982 0.68618-0.46512
  -1  10  -341029.68 2530.41   1 0.70657-0.81517 0.61066 0.02178 0.35753-0.57880
  -1  10  -340621.43 2585.44   1 0.73588-0.84456 0.60026 0.03162 0.31329-0.53451
   1  10   340152.92 2565.27   1 0.82546-0.71641 0.02411 0.60775 0.56394-0.34261
   1 -10   4 7593.44 1050.29   1-0.71835 0.83305-0.21721-0.41466 0.66090-0.36614
  -1  10  -4 6098.44  767.94   1 0.58305-0.69762 0.69632-0.06375 0.41854-0.71362
  -1  10  -4 7012.88  956.11   1 0.70624-0.82074 0.65196-0.02007 0.27596-0.57093
   1  10   4 6455.48  954.67   1 0.81853-0.70356-0.02172 0.65359 0.57404-0.27894
   1 -10   516519.78 1138.57   1-0.73870 0.85929-0.20063-0.43124 0.64347-0.27503
   1  10   512866.02  885.46   1 0.81143-0.69054-0.05948 0.69135 0.58140-0.21252
   1 -10   612062.34 1233.37   1-0.75044 0.87692-0.19069-0.44118 0.63282-0.19069
  -1  10  -610792.31 1057.09   1 0.63505-0.76119 0.74726-0.11537 0.19571-0.63817
   1  10   6 9186.42  869.11   1 0.80507-0.67826-0.08873 0.72060 0.58650-0.14385
   1 -10   711018.61 1209.46   1-0.75574 0.88810-0.18611-0.44576 0.62786-0.11204
  -1  10  -711824.15 1127.93   1 0.59409-0.72609 0.78971-0.15802 0.15299-0.66919
   1  10   710122.18  953.85   1 0.80016-0.66744-0.10917 0.74104 0.58975-0.07332
   1 -10   8 2297.75  738.52   1-0.75598 0.89423-0.18590-0.44597 0.62763-0.03812
  -1  10  -8 2873.19  697.16   1 0.54931-0.68714 0.82841-0.19672 0.10944-0.69938
   1  10   8 2526.04  615.56   1 0.79726-0.65861-0.12060 0.75247 0.59145-0.00125
  -1 -11   8 4509.29  795.99   1-0.84413 0.80007-0.09853-0.59662 0.52699 0.06256
  -1  11   8 5312.18  940.54   1 0.86018-0.90514 0.44718 0.24848 0.24517 0.34491
   1  11  -8 7058.29  988.65   1 0.64635-0.60174 0.73419-0.03912 0.20778-0.79772
  -1 -11   7 1236.99  601.69   1-0.84859 0.79864-0.09337-0.60178 0.52074-0.00488
  -1  11   7 1624.16  748.83   1 0.87142-0.92216 0.43097 0.26469 0.23426 0.28206
   1  11  -7 1633.41  498.31   1 0.68786-0.63742 0.67988 0.01518 0.25416-0.77036
  -1 -11   613265.04 1230.39   1-0.84974 0.79391-0.09201-0.60314 0.51909-0.07693
  -1  11   611385.50 1174.59   1 0.87960-0.93611 0.41860 0.27706 0.22595 0.21660
   1  11  -616543.72 1446.97   1 0.72417-0.66791 0.62182 0.07324 0.29817-0.74062
  -1  11   612384.70 1078.57   1 0.83289-0.88878 0.24008 0.45488 0.49865-0.05609
  -1 -11   5 2606.75  643.69   1-0.84681 0.78509-0.09543-0.59971 0.52325-0.15478
   1  11  -5 3985.26  963.62   1 0.75479-0.69290 0.56111 0.13376 0.33976-0.70851
  -1  11   5 4213.04 1005.67   1 0.83123-0.89302 0.26172 0.43324 0.49046-0.12166
  -1  11   4 2962.34  767.40   1 0.88653-0.95459 0.40771 0.28794 0.21865 0.07638
   1  11  -4 4276.59  704.42   1 0.78050-0.71273 0.49779 0.19707 0.37816-0.67317
  -1  11   4 4876.60  769.23   1 0.82828-0.89597 0.29074 0.40422 0.47897-0.18393
  -1 -11   353224.49 2623.21   1-0.82203 0.74854-0.12288-0.57227 0.55601-0.33493
  -1  11   355023.34 2799.44   1 0.88469-0.95852 0.41065 0.28501 0.22062 0.00065
   1  11  -353705.15 2616.64   1 0.92154-0.84771 0.34550 0.35016 0.17717-0.39845
   1  11  -354779.89 2782.04   1 0.80091-0.72726 0.43327 0.26159 0.41329-0.63454
  -1  11   349585.15 2481.48   1 0.82353-0.89713 0.32601 0.36895 0.46421-0.24293
  -1 -11   232233.38 1773.66   1-0.79308 0.71371-0.15212-0.54302 0.58980-0.44241
  -1  11   231744.55 1914.85   1 0.87845-0.95805 0.42037 0.27528 0.22714-0.07962
   1  11  -234442.20 1995.32   1 0.81617-0.73666 0.36868 0.32618 0.44488-0.59239
  -1  11   234064.50 1927.29   1 0.81649-0.89599 0.36637 0.32859 0.44621-0.29869
   1 -11  -1 1895.98  307.86   1-0.22204 0.30738-0.47440-0.22092 0.85184-0.92558
  -1 -11   1 1720.71  322.92   1-0.74218 0.65690-0.19772-0.49734 0.64036-0.56667
  -1  11   1 2150.45  591.57   1 0.86662-0.95200 0.43799 0.25766 0.23898-0.16522
  -1  11   1 2720.12  539.30   1 0.80681-0.89220 0.41065 0.28421 0.42474-0.35099
   1  11  -1 2481.05  583.03   1 0.82648-0.74108 0.30528 0.38968 0.47299-0.54675
   1 -11   022324.17 1259.57   1-0.40016 0.49136-0.40612-0.28920 0.82153-0.82153
  -1 -11   023855.32 1309.31   1-0.64903 0.55786-0.26838-0.42668 0.71184-0.71184
  -1  11   022464.01 1360.07   1 0.84726-0.93841 0.46481 0.23085 0.25707-0.25707
  -1  11   024168.70 1498.64   1 0.79382-0.88509 0.45768 0.23718 0.40044-0.40044
   1  11   026108.01 1566.28   1 0.83261-0.74131 0.24409 0.45087 0.49715-0.49715
   1 -11   114517.41  877.38   1-0.51868 0.61572-0.34791-0.34742 0.78097-0.70723
  -1  11  -113659.49 1668.26   1 0.81723-0.91415 0.50230 0.19335 0.28251-0.35627
  -1  11  -113105.34 1666.07   1 0.77735-0.87449 0.50641 0.18845 0.37318-0.44693
   1  11   113922.97 1719.00   1 0.83505-0.73785 0.18646 0.50850 0.51759-0.44383
   1 -11   2 3072.52  488.77   1-0.59784 0.70077-0.30186-0.39320 0.74260-0.59522
  -1  11  -2 2434.73  455.92   1 0.77107-0.87386 0.55222 0.14347 0.31700-0.46451
  -1  11  -2 3278.26  672.04   1 0.75718-0.86019 0.55581 0.13905 0.34313-0.49064
   1  11   2 3584.39  652.92   1 0.83456-0.73146 0.13351 0.56144 0.53448-0.38696
   1 -11   3 2705.37  398.91   1-0.65090 0.75972-0.26710-0.42796 0.71062-0.48955
  -1  11  -3 6832.31  498.70   1 0.70042-0.80901 0.61567 0.08002 0.36104-0.58231
  -1  11  -3 8051.37  785.27   1 0.73356-0.84223 0.60467 0.09039 0.31024-0.53147
   1  11   3 6157.30  599.62   1 0.83189-0.72284 0.08624 0.60881 0.54819-0.32687
   1 -11   410350.89 1284.32   1-0.68624 0.80095-0.24184-0.45322 0.68598-0.39122
  -1  11  -414065.70 1280.91   1 0.70578-0.82028 0.65269 0.04237 0.27540-0.57037
   1  11   412738.20 1220.09   1 0.82805-0.71308 0.04546 0.64959 0.55879-0.26369
   1 -11   5 1053.00  449.41   1-0.70919 0.82978-0.22441-0.47065 0.66833-0.29989
  -1  11  -5 2761.55  812.59   1 0.67420-0.79452 0.69897-0.00390 0.23850-0.60721
   1  11   5 2817.51  777.23   1 0.82379-0.70290 0.01185 0.68320 0.56676-0.19789
   1 -11   612255.07 1493.13   1-0.72313 0.84961-0.21338-0.48168 0.65691-0.21478
  -1  11  -611885.49 1320.51   1 0.63887-0.76501 0.74292-0.04784 0.19977-0.64222
   1  11   610719.63 1231.49   1 0.81981-0.69300-0.01409 0.70914 0.57245-0.12980
   1 -11   715912.92 1510.28   1-0.73027 0.86263-0.20759-0.48746 0.65084-0.13502
  -1  11  -713849.12 1418.47   1 0.60016-0.73216 0.78389-0.08904 0.15908-0.67528
   1  11   713268.97 1284.65   1 0.81673-0.68400-0.03197 0.72702 0.57612-0.05970
   1 -11   819136.16 2251.78   1-0.73203 0.87027-0.20615-0.48891 0.64932-0.05981
  -1  11  -820493.67 2415.34   1 0.55761-0.69544 0.82176-0.12690 0.11734-0.70728
  -1 -12   7 9361.71 1337.03   1-0.82147 0.77153-0.12347-0.63487 0.55671-0.04084
  -1  12   7 5016.37 1075.05   1 0.86003-0.91077 0.44738 0.31152 0.24531 0.27101
   1  12  -7 5453.26  818.77   1 0.68605-0.63562 0.68248 0.07577 0.25207-0.76827
  -1 -12   6 1853.20  622.83   1-0.82054 0.76471-0.12445-0.63389 0.55786-0.11569
  -1  12   6 1767.30  781.54   1 0.86769-0.92420 0.43645 0.32245 0.23794 0.20461
   1  12  -6 1009.34  423.21   1 0.72055-0.66429 0.62816 0.13009 0.29360-0.73606
  -1  12   6  375.53  302.21   1 0.82812-0.88401 0.29207 0.46607 0.47843-0.03587
  -1 -12   5 8577.96 1053.25   1-0.81481 0.75309-0.13043-0.62791 0.56485-0.19638
  -1  12   5 8190.23 1046.79   1 0.87224-0.93452 0.42975 0.32915 0.23344 0.13535
   1  12  -5 8446.97 1037.32   1 0.74978-0.68789 0.57190 0.18613 0.33278-0.70153
  -1  12   5 7235.80  914.12   1 0.82594-0.88773 0.30934 0.44879 0.47130-0.10250
  -1 -12   414325.49 1201.16   1-0.80260 0.73500-0.14280-0.61554 0.57916-0.28438
  -1  12   4 9680.60 1076.67   1 0.87348-0.94153 0.42791 0.33099 0.23220 0.06283
   1  12  -4 9827.38  950.40   1 0.77458-0.70681 0.51375 0.24428 0.36887-0.66387
  -1  12   410074.33  915.38   1 0.82235-0.89005 0.33355 0.42459 0.46094-0.16590
  -1 -12   3 -199.42  296.04   1-0.78101 0.70752-0.16357-0.59478 0.60270-0.38162
  -1  12   3  -13.92  475.65   1 0.87099-0.94482 0.43160 0.32730 0.23469-0.01340
   1  12  -3  405.35  254.97   1 0.89861-0.82478 0.38775 0.37115 0.20530-0.42658
   1  12  -3 -224.72  386.74   1 0.79464-0.72100 0.45499 0.30305 0.40189-0.62314
  -1  12   3  839.46  395.40   1 0.81702-0.89062 0.36364 0.39449 0.44746-0.22618
  -1 -12   2 1961.12  441.07   1-0.74468 0.66528-0.19560-0.56264 0.63810-0.49072
  -1  12   2 4207.48  973.97   1 0.86407-0.94368 0.44166 0.31724 0.24145-0.09393
   1  12  -2 4453.05 1019.26   1 0.81018-0.73067 0.39655 0.36148 0.43167-0.57917
  -1  12   2 4049.02  907.86   1 0.80969-0.88921 0.39868 0.35936 0.43063-0.28313
  -1 -12   113625.91 1034.36   1-0.68365 0.59837-0.24376-0.51449 0.68789-0.61420
  -1  12   115019.53 1355.31   1 0.85158-0.93695 0.45903 0.29987 0.25317-0.17941
  -1  12   113988.34 1229.71   1 0.79973-0.88512 0.43750 0.32053 0.41110-0.33735
   1  12  -113075.86 1121.08   1 0.82137-0.73597 0.33953 0.41860 0.45831-0.53207
   1 -12   0 7830.09  965.69   1-0.35127 0.44246-0.42698-0.33156 0.83324-0.83324
  -1  12   0 7739.79 1003.14   1 0.83169-0.92284 0.48481 0.27409 0.27062-0.27062
  -1  12   0 8540.56 1179.87   1 0.78693-0.87819 0.47925 0.27878 0.38865-0.38865
   1  12   0 7358.56 1050.47   1 0.82896-0.73765 0.28474 0.47340 0.48140-0.48140
   1 -12   1 1981.27  542.45   1-0.47271 0.56975-0.37187-0.38667 0.79890-0.72516
  -1  12  -1 1937.58  713.07   1 0.80154-0.89846 0.52024 0.23866 0.29473-0.36850
  -1  12  -1  640.61  395.65   1 0.77099-0.86813 0.52298 0.23505 0.36338-0.43713
   1  12   1  905.07  427.52   1 0.83331-0.73611 0.23329 0.52485 0.50115-0.42739
   1 -12   217425.08 1364.90   1-0.55549 0.65838-0.32731-0.43123 0.76438-0.61690
  -1  12  -214134.82 1149.51   1 0.75620-0.85899 0.56675 0.19219 0.32701-0.47453
  -1  12  -211858.00 1041.21   1 0.75171-0.85472 0.56779 0.19024 0.33545-0.48295
   1  12   213102.03 1160.62   1 0.83506-0.73195 0.18613 0.57201 0.51770-0.37018
   1 -12   3 5386.63 1245.60   1-0.61210 0.72092-0.29285-0.46540 0.73454-0.51348
  -1  12  -3 5159.79 1138.83   1 0.68839-0.79699 0.62520 0.13373 0.36772-0.58899
  -1  12  -3 4643.08 1127.18   1 0.72928-0.83796 0.61261 0.14564 0.30470-0.52593
   1  12   3 6927.43 1554.39   1 0.83487-0.72586 0.14410 0.61403 0.53124-0.30996
   1 -12   4 1770.79  490.39   1-0.65069 0.76540-0.26724-0.49101 0.71075-0.41600
  -1  12  -4 2921.27  692.52   1 0.70298-0.81748 0.65712 0.10113 0.27203-0.56700
   1  12   4 4485.36 1004.91   1 0.83332-0.71835 0.10791 0.65033 0.54214-0.24704
   1 -12   5 8919.76 1266.41   1-0.67645 0.79704-0.24902-0.50922 0.69310-0.32466
  -1  12  -5 8684.41 1179.97   1 0.67307-0.79340 0.70048 0.05777 0.23723-0.60594
   1  12   5 9242.92 1304.59   1 0.83125-0.71036 0.07820 0.68003 0.55036-0.18148
   1 -12   615224.18 1434.37   1-0.69276 0.81924-0.23698-0.52127 0.68110-0.23897
  -1  12  -616646.75 1624.94   1 0.63957-0.76571 0.74212 0.01614 0.20051-0.64297
   1  12   616333.12 1548.85   1 0.82914-0.70233 0.05551 0.70272 0.55627-0.11362
  -1 -13   514280.98 1741.71   1-0.77862 0.71690-0.16579-0.65575 0.60519-0.23672
  -1  13   518448.98 2333.61   1 0.85799-0.92027 0.45024 0.37190 0.24723 0.12156
  -1  13   514646.77 1775.50   1 0.81873-0.88052 0.35461 0.46671 0.45158-0.08278
  -1 -13   4  211.47  314.46   1-0.76218 0.69458-0.18067-0.64087 0.62163-0.32685
  -1  13   4  537.63  482.28   1 0.85860-0.92666 0.44938 0.37276 0.24666 0.04838
   1  13  -4 1869.88  648.60   1 0.76749-0.69972 0.53170 0.28950 0.35812-0.65312
  -1  13   4 1200.11  541.37   1 0.81492-0.88269 0.37485 0.44635 0.44201-0.14700
  -1 -13   3 5651.95  815.25   1-0.73477 0.66126-0.20389-0.61754 0.64694-0.42587
  -1  13   3 5971.34 1041.08   1 0.85542-0.92925 0.45379 0.36835 0.24963-0.02835
   1  13  -3 2114.04  677.64   1 0.78734-0.71370 0.47800 0.34320 0.38934-0.61060
  -1  13   3 5947.98  899.91   1 0.80926-0.88291 0.40049 0.42071 0.42974-0.20849
  -1  13   2 7293.77 1102.67   1 0.84773-0.92733 0.46419 0.35796 0.25665-0.10913
   1  13  -2 5079.84  867.09   1 0.90537-0.82577 0.37592 0.44622 0.19741-0.34493
  -1  13   2 5120.55  879.14   1 0.80157-0.88108 0.43085 0.39035 0.41453-0.26703
   1  13  -2 5981.84 1055.08   1 0.80316-0.72364 0.42493 0.39627 0.41756-0.56506
  -1  13   1 1872.47  617.57   1 0.83442-0.91980 0.48139 0.34075 0.26830-0.19454
  -1  13   1 1591.07  456.25   1 0.79154-0.87693 0.46505 0.35615 0.39646-0.32271
   1  13  -1 1637.83  485.84   1 0.81523-0.72984 0.37334 0.44786 0.44271-0.51646
  -1  13   023192.74 1831.26   1 0.81377-0.90492 0.50634 0.31580 0.28526-0.28526
  -1  13   023789.27 1918.17   1 0.77889-0.87015 0.50223 0.31897 0.37560-0.37560
   1  13   023535.24 1912.63   1 0.82382-0.73251 0.32415 0.49716 0.46501-0.46501
  -1  13  -116143.14 1370.62   1 0.78288-0.87987 0.54017 0.28202 0.30871-0.38246
  -1  13  -115091.40 1300.51   1 0.76338-0.86051 0.54157 0.27963 0.35206-0.42581
   1  13   116589.29 1478.60   1 0.82967-0.73247 0.27806 0.54326 0.48406-0.41030
   1 -13   2 1145.31  370.79   1-0.50861 0.61150-0.35332-0.46843 0.78516-0.63767
  -1  13  -2 1888.24  475.76   1 0.73783-0.84062 0.58378 0.23840 0.33881-0.48632
  -1  13  -2 2456.29  674.05   1 0.74478-0.84779 0.58227 0.23893 0.32594-0.47344
   1  13   2 2959.07  631.19   1 0.83315-0.73004 0.23595 0.58537 0.50017-0.35265
   1 -13   3 5104.52  938.62   1-0.56932 0.67806-0.31923-0.50252 0.75760-0.53637
  -1  13  -3 9839.75 1379.74   1 0.72328-0.83196 0.62339 0.19805 0.29704-0.51827
   1  13   3 5777.61  918.90   1 0.83480-0.72579 0.19856 0.62275 0.51348-0.29220
   1 -13   434241.59 8386.78   1-0.61143 0.72614-0.29328-0.52816 0.73493-0.44017
  -1  13  -430313.19 2625.35   1 0.69815-0.81265 0.66459 0.15686 0.26626-0.56123
   1  13   432035.25 2743.03   1 0.83517-0.72026 0.16655 0.65476 0.52415-0.22911
   1 -13   515076.35 1844.45   1-0.64024 0.76083-0.27437-0.54707 0.71750-0.34906
  -1  13  -514126.64 1810.22   1 0.66961-0.78993 0.70510 0.11634 0.23333-0.60205
   1  13   513292.51 1695.95   1 0.83477-0.71396 0.14051 0.68080 0.53235-0.16355
  -1  14   3 3194.48  764.69   1 0.83790-0.91173 0.47698 0.40840 0.26531-0.04403
   1  14  -3 1974.92  687.79   1 0.77895-0.70531 0.50206 0.38231 0.37570-0.59696
  -1  14   3 1106.46  511.62   1 0.79999-0.87363 0.43657 0.44780 0.41158-0.19033
  -1  14   2 9058.97 1310.93   1 0.82935-0.90895 0.48771 0.39768 0.27258-0.12506
   1  14  -2 9456.33 1250.68   1 0.79503-0.71551 0.45372 0.43065 0.40256-0.55006
  -1  14   2 9074.37 1215.66   1 0.79219-0.87170 0.46297 0.42140 0.39759-0.25008
  -1  14   116876.93 1618.83   1 0.81510-0.90047 0.50480 0.38058 0.28421-0.21044
   1  14  -117513.04 1590.00   1 0.90340-0.81803 0.37941 0.50598 0.19974-0.27350
  -1  14   119930.45 1836.55   1 0.78216-0.86754 0.49314 0.39123 0.38082-0.30707
   1  14  -117499.34 1627.47   1 0.80771-0.72233 0.40697 0.47740 0.42656-0.50032
  -1  14   0 6853.77  872.29   1 0.79347-0.88462 0.52907 0.35631 0.30078-0.30078
   1  14   0 6885.87  782.30   1 0.91776-0.82661 0.35290 0.53248 0.18209-0.18209
  -1  14   0 7743.80  891.84   1 0.76966-0.86092 0.52632 0.35805 0.36137-0.36137
   1  14   0 6786.19  808.29   1 0.81722-0.72592 0.36260 0.52189 0.44794-0.44794
  -1  14  -1 2196.21  576.62   1 0.76169-0.85868 0.56147 0.32396 0.32337-0.39713
  -1  14  -1 3678.49  818.73   1 0.75449-0.85163 0.56176 0.32261 0.33933-0.41309
   1  14   1 2418.89  700.60   1 0.82426-0.72705 0.32120 0.56330 0.46628-0.39252
  -1  14  -2 3817.07 1093.94   1 0.73672-0.83957 0.59866 0.28597 0.31438-0.46187
   1  14   2 4907.66  799.25   1 0.82909-0.72598 0.28354 0.60095 0.48187-0.33435
  -1  14  -3 4285.46  817.13   1 0.71568-0.82436 0.63648 0.24815 0.28753-0.50876
   1  14   3 3197.52  602.17   1 0.83216-0.72315 0.25029 0.63420 0.49482-0.27354
   2   0 -1229197.99 2738.47   1 0.94211-0.83057-0.05347 0.05347-0.33099-0.55433
   2   0 -1117467.74 2623.66   1 0.95678-0.83933-0.09216 0.09216-0.27580-0.53574
   2   0 -10 3724.95 1285.95   1 0.96727-0.84396-0.13103 0.13103-0.21726-0.52014
   2   0  -917164.62 2626.98   1 0.97288-0.84364-0.17172 0.17172-0.15496-0.50870
  -2   0   915939.20 1051.56   1 0.51438-0.64426 0.73288-0.73288 0.44529 0.21862
   2   0  -914110.55 1263.92   1-0.08352 0.21335 0.92883-0.92883-0.36094-0.30288
   2   0  -8 1242.78  437.28   1 0.97288-0.83771-0.21409 0.21409-0.08753-0.50239
  -2   0   8 1401.25  430.41   1 0.54155-0.67728 0.71922-0.71922 0.43522 0.15492
   2   0  -8  563.08  150.75   1-0.00096 0.13664 0.95045-0.95045-0.31085-0.27921
   2   0  -713175.54 1525.64   1 0.96575-0.82467-0.25908 0.25908-0.01345-0.50276
  -2   0   712249.08  651.58   1 0.55539-0.69695 0.71187-0.71187 0.42984 0.08653
   2   0  -711972.75  565.59   1 0.09144 0.05001 0.96327-0.96327-0.25247-0.26382
  -2   0   710676.58  432.28   1 0.83399-0.97528 0.22070-0.22070 0.50571 0.01060
   2   0  -6133785.3 4096.31   1 0.94916-0.80218-0.30698 0.30698 0.06963-0.51211
  -2   0   6130434.4 3934.05   1 0.55407-0.70147 0.71258-0.71258 0.43036 0.01224
   2   0  -6132092.4 3900.52   1 0.19577-0.04847 0.96387-0.96387-0.18062-0.26192
  -2   0   6122689.1 3621.95   1 0.83518-0.98237 0.16846-0.16846 0.52353-0.08097
   2   0  -5245603.6 5832.52   1 0.91876-0.76588-0.35872 0.35872 0.16487-0.53360
  -2   0   5239208.2 5640.15   1 0.53398-0.68722 0.72313-0.72313 0.43809-0.06925
   2   0  -5235137.0 5459.54   1 0.33136-0.17814 0.94023-0.94023-0.07849-0.29022
   2   0  -371208.53 1182.52   1 0.78021-0.61547-0.47342 0.47342 0.40880-0.63012
  -2   0   369436.24 1161.39   1 0.58195-0.74696-0.54212 0.54212 0.60616-0.38489
  -2   0   369982.38 1160.59   1 0.41070-0.57562 0.77633-0.77633 0.47814-0.25684
   2   0  -365351.77 1057.33   1 0.70877-0.54380 0.60886-0.60886 0.35627-0.57754
  -2   0   368499.41  986.35   1 0.54289-0.70777-0.61052 0.61052 0.57664-0.35540
   2   0  -2596808.8 8301.78   1 0.63513-0.46451-0.52981 0.52981 0.56204-0.70959
  -2   0   2592567.8 8238.43   1 0.45050-0.62130-0.56127 0.56127 0.69427-0.54676
  -2   0   2587681.1 8182.71   1 0.28911-0.45985 0.81187-0.81187 0.50721-0.35970
   2   0  -2572191.4 7948.34   1 0.52920-0.35845 0.72556-0.72556 0.43988-0.58742
   2   0  -2613971.9 8436.48   1 0.67238-0.50163-0.42508 0.42508 0.60596-0.75343
  -2   0   1316985.0 4458.58   1 0.22811-0.40471-0.56265 0.56265 0.79459-0.72085
   2   0   038123.42  686.69   1 0.09117 0.09117-0.54799 0.54799 0.83149-0.83149
  -2   0   034676.64  636.84   1-0.09117-0.09117-0.51191 0.51191 0.85418-0.85418
  -2   0   038049.49  708.32   1-0.09122-0.09122 0.83580-0.83580 0.54139-0.54139
   2   0   038145.08  696.02   1 0.09122 0.09122 0.83983-0.83983 0.53512-0.53512
  -2   0   039309.48  682.73   1-0.09123-0.09123 0.92634-0.92634-0.36547 0.36547
   2   0   1 3150.93  292.54   1-0.22506 0.41329-0.47342 0.47342 0.85159-0.77785
  -2   0  -1 2862.62  192.07   1-0.42738 0.23914-0.39376 0.39376 0.81381-0.88755
  -2   0  -1 3502.89  218.54   1-0.31400 0.12573 0.79152-0.79152 0.52430-0.59806
   2   0   1 3409.65  263.11   1-0.10337 0.29169 0.83453-0.83453 0.54117-0.46740
  -2   0  -1 3634.64  605.66   1 0.01036-0.19868 0.95269-0.95269-0.30374 0.22998
   2   0   1 4011.01  553.19   1 0.18292 0.00534 0.96464-0.96464-0.18975 0.26350
   2   0   221198.74  522.08   1-0.45793 0.65201-0.37919 0.37919 0.80405-0.65657
  -2   0  -219294.50  453.26   1-0.67826 0.48416-0.24771 0.24771 0.69180-0.83918
  -2   0  -221488.30  510.06   1-0.51836 0.32426 0.70709-0.70709 0.48094-0.62838
   2   0   219009.76  456.61   1-0.25127 0.44540 0.80849-0.80849 0.53215-0.38463
   2   0   220128.71  515.81   1 0.25627-0.06220 0.95701-0.95701-0.13579 0.28328
   2   0   330030.20  642.51   1-0.59837 0.79835-0.30153 0.30153 0.74231-0.52124
  -2   0  -329638.61  581.24   1-0.82828 0.62833-0.11620 0.11620 0.54813-0.76921
  -2   0  -331801.90  645.72   1-0.68483 0.48488 0.59673-0.59673 0.41821-0.63936
   2   0   330321.10  597.71   1-0.35124 0.55124 0.77961-0.77961 0.51847-0.29719
   2   0   328950.46  854.92   1 0.31949-0.11958 0.94351-0.94351-0.08776 0.30899
   2   0   4523995.715345.38   1-0.67741 0.88328-0.24833 0.24833 0.69241-0.39766
  -2   0  -4523522.412222.91   1-0.80895 0.60332 0.47591-0.47591 0.34511-0.63993
   2   0   4502548.311666.11   1-0.41268 0.61859 0.75638-0.75638 0.50750-0.21264
  -2   0  -4545395.616009.97   1 0.06888-0.27469 0.96113-0.96113-0.26735-0.02767
   2   0   5238688.4 5664.94   1-0.72046 0.93222-0.21552 0.21552 0.65915-0.29070
  -2   0  -5263803.0 6203.57   1-0.89667 0.68517 0.35107-0.35107 0.26966-0.63818
   2   0   5242648.2 5708.73   1-0.44429 0.65610 0.74305-0.74305 0.50047-0.13188
  -2   0  -5268468.6 6381.72   1 0.05475-0.26642 0.95943-0.95943-0.27656-0.09222
   2   0   636251.11 1405.06   1-0.74246 0.96010-0.19748 0.19748 0.64011-0.19798
  -2   0  -635168.81 1347.53   1 0.03158-0.24914 0.95642-0.95642-0.29027-0.15227
   2   0   7 6361.07  504.33   1-0.75138 0.97491-0.18988 0.18988 0.63195-0.11613
  -2   0  -7 6574.76  784.20   1-0.98639 0.76302 0.11139-0.11139 0.12087-0.63669
  -2   0  -7 6811.64 1019.25   1 0.00355-0.22696 0.95137-0.95137-0.30802-0.20828
   2   0   826096.98 1501.13   1-0.75149 0.98091-0.18979 0.18979 0.63184-0.04233
  -2   0  -827312.83 1969.63   1-0.99874 0.76905-0.00929 0.00929 0.04920-0.63911
  -2   0  -827819.50 1549.70   1-0.02910-0.20015 0.94413-0.94413-0.32826-0.26180
   2   0   9 8107.62 1094.48   1-0.74512 0.98042-0.19523 0.19523 0.63770 0.02549
  -2   0  -9 7201.85 1256.23   1-0.06558-0.16952 0.93433-0.93433-0.35032-0.31351
   2   0  10 8505.63 1621.85   1-0.73355 0.97473-0.20490 0.20490 0.64800 0.08887
  -2   0 -10 7778.30 1491.05   1-0.10541-0.13554 0.92153-0.92153-0.37371-0.36387
   2   0  11 2585.90  606.40   1-0.71746 0.96453-0.21791 0.21791 0.66162 0.14894
  -2   0 -11 2592.35  525.67   1-0.14829-0.09850 0.90527-0.90527-0.39810-0.41324
   2   0  12 1027.84  445.62   1-0.69718 0.95013-0.23365 0.23365 0.67774 0.20651
   2  -1 -12 1096.07  455.08   1 0.94264-0.83110-0.05469-0.00850-0.32928-0.55605
   2   1 -12 1199.75  489.53   1 0.94021-0.82867-0.04917 0.11238-0.33700-0.54833
   2  -1 -11 5792.22 1813.76   1 0.95790-0.84045-0.09571 0.03250-0.27065-0.54090
   2   1 -11 6894.04 1786.35   1 0.95461-0.83716-0.08563 0.14884-0.28525-0.52630
   2   1 -1017360.89 2773.02   1 0.96533-0.84201-0.12201 0.18522-0.23075-0.50665
   2  -1 -1016033.54 2190.28   1 0.96846-0.84514-0.13716 0.07395-0.20801-0.52939
  -2   1  1019285.08 1624.94   1 0.58028-0.70432 0.69793-0.63467 0.41971 0.31797
   2   1  -9 1066.92  368.80   1 0.97179-0.84255-0.15983 0.22303-0.17340-0.49026
   2  -1  -9 1145.01  287.48   1 0.97340-0.84415-0.18086 0.11765-0.14064-0.52302
  -2  -1   9  378.13  227.13   1 0.35538-0.48511 0.79430-0.85755 0.49273 0.17106
  -2   1   9  444.64  270.45   1 0.61589-0.74603 0.67636-0.61311 0.40398 0.25982
   2   1  -9  719.71  167.19   1 0.12211 0.00763 0.96505-0.90186-0.23187-0.43194
   2   1  -866772.03 3422.59   1 0.97359-0.83842-0.19887 0.26208-0.11206-0.47786
   2  -1  -867587.42 3438.74   1 0.97165-0.83649-0.22671 0.16351-0.06691-0.52301
  -2  -1   865863.93 3306.77   1 0.38121-0.51693 0.78641-0.84966 0.48603 0.10411
  -2   1   869024.67 3492.78   1 0.64241-0.77836 0.65882-0.59558 0.39147 0.19858
   2   1  -869346.98 3467.20   1 0.22541-0.08981 0.96115-0.89797-0.15927-0.43078
   2   1  -783448.32 2861.24   1 0.96979-0.82869-0.23965 0.30285-0.04550-0.47067
   2  -1  -790232.75 3053.42   1 0.96107-0.81999-0.27587 0.21267 0.01516-0.53139
  -2  -1   790029.60 2966.96   1 0.38876-0.53032 0.78392-0.84717 0.48407 0.03231
  -2   1   785061.25 2910.37   1 0.65910-0.80085 0.64711-0.58387 0.38317 0.13313
   2   1  -780680.25 2640.36   1 0.33690-0.19535 0.93861-0.87545-0.07414-0.44206
  -2   1   781590.56 2633.45   1 0.82499-0.96628 0.31614-0.25296 0.46843 0.04788
  -2  -1   785242.37 2789.05   1 0.83504-0.97633 0.15273-0.21591 0.52856-0.01223
   2   1  -666544.42 2215.33   1 0.95865-0.81167-0.28320 0.34640 0.02782-0.47030
   2  -1  -673714.03 2419.67   1 0.93826-0.79128-0.32847 0.26527 0.10842-0.55090
  -2  -1   674302.21 2294.61   1 0.37443-0.52182 0.78859-0.85185 0.48776-0.04514
  -2   1   668537.08 2216.37   1 0.66490-0.81245 0.64292-0.57967 0.38020 0.06234
   2   1  -666134.53 2045.12   1 0.46198-0.31452 0.88637-0.82320 0.03020-0.47266
  -2   1   665396.03 1940.85   1 0.83077-0.97797 0.26679-0.20361 0.48849-0.04593
  -2  -1   668694.01 2076.80   1 0.83327-0.98034 0.10704-0.17023 0.54239-0.09974
   2   1  -543385.95 1205.30   1 0.93755-0.78467-0.32973 0.39293 0.11072-0.47946
   2  -1  -536242.56 1059.24   1 0.89726-0.74433-0.38472 0.32153 0.21657-0.58530
  -2  -1   535038.89  968.24   1 0.33412-0.48729 0.80041-0.86367 0.49768-0.12890
  -2   1   544250.00 1232.57   1 0.65753-0.81089 0.64823-0.58499 0.38396-0.01517
   2   1  -539804.23 1027.80   1 0.88790-0.73447 0.40552-0.34228 0.21718-0.58599
   2   1  -543536.13 1095.23   1 0.60422-0.45093 0.77992-0.71675 0.16318-0.53189
  -2  -1   534457.62  889.26   1 0.82425-0.97724 0.01516-0.07834 0.56601-0.19713
  -2   1   540935.93  965.67   1 0.82941-0.98240 0.05825 0.00492 0.55558-0.18670
   2  -1  -435449.66  990.89   1 0.82690-0.66809-0.44521 0.38202 0.34352-0.63851
  -2  -1   433790.05  906.89   1 0.25996-0.41898 0.81825-0.88151 0.51271-0.21769
  -2   1   443248.52 1198.53   1 0.63291-0.79207 0.66525-0.60200 0.39605-0.10102
   2   1  -440969.10 1050.65   1 0.75095-0.59179 0.57172-0.50847 0.33045-0.62548
   2  -1  -430645.68  836.80   1 0.89899-0.73978 0.38709-0.45033 0.20486-0.49990
   2   1  -443051.75 1062.24   1 0.74725-0.58822 0.57721-0.51404 0.32929-0.62430
  -2  -1   431460.35  797.94   1 0.79209-0.95117-0.13829 0.07508 0.59451-0.29937
   2  -1  -366518.88 1119.35   1 0.70913-0.54438-0.50572 0.44251 0.49129-0.71261
  -2  -1   367620.21 1095.30   1 0.14674-0.31162 0.83561-0.89887 0.52934-0.30807
  -2  -1   367944.11 1037.87   1 0.70940-0.87435-0.35647 0.29326 0.60800-0.38664
   2   1  -218391.08  503.14   1 0.73958-0.56896-0.49318 0.55639 0.45801-0.60556
   2  -1  -217347.44  443.27   1 0.51879-0.34799-0.55332 0.49009 0.65167-0.79918
  -2   1   217764.83  404.50   1 0.29490-0.46567-0.56567 0.62890 0.77008-0.62259
  -2  -1   216136.32  424.03   1-0.00510-0.16561 0.84121-0.90443 0.54068-0.39314
   2   1  -217329.12  447.29   1 0.29751-0.12677 0.80989-0.74663 0.50553-0.65304
  -2   1   218752.20  546.61   1 0.50158-0.67233 0.73897-0.67571 0.44981-0.30227
   2  -1  -216407.76  431.45   1 0.70058-0.52982 0.61554-0.67878 0.36094-0.50846
   2  -1  -217474.20  289.08   1 0.57532-0.40455 0.80679-0.86996 0.13446-0.28194
   2   1  -219042.72  394.80   1 0.76516-0.59433-0.22391 0.28712 0.60364-0.75121
  -2  -1   216574.91  351.15   1 0.56012-0.73084-0.58970 0.52652 0.58181-0.43432
   2   1  -1780302.510784.60   1 0.56780-0.39121-0.54498 0.60821 0.61691-0.69067
  -2   1   1768989.910622.53   1 0.04253-0.21908-0.54020 0.60341 0.84045-0.76674
  -2  -1   1866846.820002.09   1-0.18475 0.00822 0.82250-0.88571 0.53791-0.46415
  -2   1   1790215.318249.06   1 0.37177-0.54837 0.78926-0.72601 0.48871-0.41495
   2   1  -1788180.510860.25   1 0.56679-0.39022-0.58145 0.64464 0.58365-0.65738
   2   1   0991206.322844.04   1 0.29824-0.11581-0.56575 0.62898 0.76874-0.76874
  -2   1   0931984.521482.29   1-0.26189 0.07951-0.46093 0.52414 0.84790-0.84790
  -2  -1   0900694.320786.66   1-0.37006 0.18766 0.77306-0.83627 0.51518-0.51518
  -2   1   0999998.323062.87   1 0.18586-0.36832 0.83091-0.76766 0.52443-0.52443
   2  -1   0870053.120072.17   1 0.37541-0.19295 0.78811-0.85136 0.48779-0.48779
   2  -1   0845509.319501.57   1 0.41687-0.23447 0.90891-0.97207-0.00925 0.00925
  -2  -1  -137778.51  636.56   1-0.29909 0.11085-0.44746 0.38424 0.84280-0.91655
   2  -1   141658.09  797.67   1-0.35076 0.53899-0.42723 0.36402 0.83332-0.75958
  -2  -1  -141239.20  760.97   1-0.53882 0.35063 0.69590-0.75910 0.47474-0.54846
   2   1   136441.05  672.39   1-0.34654 0.53481 0.78119-0.71798 0.51926-0.44550
   2  -1   139673.11  712.41   1 0.19298-0.00466 0.82991-0.89317 0.52344-0.44968
  -2   1  -136384.12  721.08   1 0.25544-0.44368 0.95715-0.89399-0.13641 0.06267
   2  -1   218839.16  494.61   1-0.53506 0.72914-0.33890 0.27569 0.77385-0.62636
  -2   1  -223135.77  490.28   1-0.72754 0.53343-0.20982 0.27301 0.65319-0.80056
   2   1   223725.39  540.66   1-0.45521 0.64930 0.73818-0.67497 0.49786-0.35043
  -2   1  -224197.08  518.75   1-0.30420 0.11007 0.79442-0.73120 0.52569-0.67321
   2  -1   219050.34  438.54   1 0.02768 0.16650 0.84162-0.90485 0.53935-0.39181
  -2   1  -224292.47  581.32   1 0.25354-0.44766 0.95734-0.89415-0.13860-0.00890
   2  -1   399681.91 1623.48   1-0.64410 0.84409-0.27175 0.20856 0.71503-0.49397
  -2  -1  -396152.82 1467.20   1-0.81517 0.61522-0.13006 0.06687 0.56442-0.78550
  -2  -1  -3103606.1 1650.69   1-0.78832 0.58836 0.49877-0.56196 0.36023-0.58139
   2  -1   394211.75 1440.98   1-0.10246 0.30252 0.83463-0.89785 0.54119-0.31989
  -2  -1  -3107248.9 1736.76   1-0.10806-0.09194 0.92060-0.98378-0.37525 0.15397
   2   1   441302.21 1065.17   1 0.91144-0.70536 0.00545 0.05775-0.41138 0.70649
  -2  -1  -451112.05 1360.81   1-0.86975 0.66412 0.39469-0.45784 0.29620-0.59102
  -2   1  -446053.71 1183.16   1-0.72249 0.51664 0.56443-0.50124 0.39926-0.69414
   2   1   440748.60 1092.25   1-0.55768 0.76359 0.68506-0.62185 0.46869-0.17382
   2  -1   447917.56 1226.14   1-0.19392 0.39978 0.82080-0.88402 0.53727-0.24223
  -2  -1  -452939.40 1568.82   1-0.08780-0.11805 0.92746-0.99064-0.36346 0.06842
   2   1   5 2841.71  313.06   1-0.68591 0.89766-0.24209 0.30528 0.68623-0.31778
   2  -1   5 1160.65  350.17   1-0.74046 0.95222-0.19916 0.13597 0.64190-0.27346
  -2  -1  -5 1983.57  219.57   1-0.92800 0.71642 0.29101-0.35415 0.23263-0.60108
  -2   1  -5 3146.93  464.21   1-0.85298 0.64148 0.41915-0.35600 0.31101-0.67953
   2  -1   5 1395.87  148.41   1-0.24928 0.46101 0.80897-0.87218 0.53236-0.16356
  -2  -1  -5  639.85  170.24   1-0.08419-0.12751 0.92862-0.99180-0.36134-0.00745
  -2   1  -5 3706.21  488.40   1 0.18251-0.39418 0.96466-0.90147-0.19003-0.17875
   2   1   667134.17 2330.06   1-0.71593 0.93357-0.21913 0.28232 0.66289-0.22075
   2  -1   666960.57 2388.53   1-0.75784 0.97548-0.18427 0.12109 0.62586-0.18373
  -2  -1  -662763.94 2170.17   1-0.96716 0.74968 0.18927-0.25241 0.16962-0.61176
  -2   1  -664380.01 2188.39   1-0.93688 0.71941 0.27133-0.20819 0.22051-0.66264
   2  -1   658999.89 2007.40   1-0.27561 0.49320 0.80235-0.86556 0.52939-0.08683
  -2  -1  -666872.42 2358.49   1-0.09230-0.12525 0.92598-0.98917-0.36609-0.07645
  -2   1  -669088.85 2430.87   1 0.14801-0.36553 0.96552-0.90234-0.21414-0.22840
   2   1   7 7185.42  566.93   1-0.72921 0.95274-0.20845 0.27164 0.65175-0.13593
   2  -1   711812.66  692.21   1-0.76440 0.98788-0.17870 0.11551 0.61948-0.10361
  -2  -1  -712640.09 1672.43   1-0.99009 0.76672 0.09025-0.15339 0.10756-0.62338
  -2   1  -7 6898.52  386.92   1-0.98307 0.75969 0.12786-0.06472 0.13122-0.64704
   2  -1   710498.19  449.41   1-0.27848 0.50194 0.80159-0.86480 0.52904-0.01272
  -2  -1  -712073.12  671.29   1-0.10902-0.11438 0.92026-0.98344-0.37580-0.14051
  -2   1  -7 6791.39  858.19   1 0.11015-0.33352 0.96451-0.90133-0.23995-0.27634
   2   1   8 1488.23  441.66   1-0.73166 0.96107-0.20645 0.26964 0.64964-0.06013
   2  -1   8 1660.18  491.86   1-0.76334 0.99271-0.17964 0.11645 0.62051-0.03095
  -2   1  -8 1464.46  293.08   1-0.99887 0.76918-0.01753 0.08073 0.04398-0.63390
  -2  -1  -8 1172.41  252.82   1-0.99880 0.76911-0.01249-0.05071 0.04717-0.63709
  -2  -1  -8 2047.76  338.94   1-0.13236-0.09689 0.91161-0.97480-0.38914-0.20092
  -2   1  -8 2568.80  525.48   1 0.06944-0.29866 0.96119-0.89801-0.26699-0.32306
   2   1   926345.90 1537.95   1-0.72640 0.96170-0.21074 0.27393 0.65415 0.00904
   2  -1   923475.24 1470.55   1-0.75654 0.99184-0.18541 0.12222 0.62710 0.03609
  -2  -1  -926451.46 1480.77   1-0.99409 0.75847-0.10769 0.04448-0.01347-0.65017
  -2   1  -929015.90 1674.06   1 0.02499-0.26010 0.95533-0.89214-0.29447-0.36935
   2  -1  1043559.32 3119.87   1-0.74508 0.98626-0.19526 0.13208 0.63774 0.09914
   2   1  1041809.69 2985.19   1-0.71514 0.95632-0.21975 0.28294 0.66353 0.07335
  -2   1 -1047495.93 9956.57   1-0.02063-0.22032 0.94615-0.88296-0.32306-0.41452
   2  -1  1116779.13 1815.38   1-0.72948 0.97655-0.20824 0.14505 0.65152 0.15904
   2   1  1118213.79 1850.75   1-0.69878 0.94585-0.23243 0.29562 0.67651 0.13405
  -2   1 -1115286.86 2009.13   1-0.06859-0.17821 0.93344-0.87025-0.35211-0.45923
   2   1  12  502.76  279.51   1-0.67775 0.93070-0.24808 0.31127 0.69217 0.19208
   2  -1  12  537.44  329.79   1-0.71001 0.96296-0.22378 0.16059 0.66768 0.21657
  -2   1 -12  246.20  258.17   1-0.11891-0.13374 0.91669-0.85350-0.38148-0.50362
   2  -2 -12 2774.88 1190.15   1 0.94160-0.83006-0.05231-0.07408-0.33261-0.55271
   2   2 -12 4579.43  847.96   1 0.93702-0.82548-0.04221 0.16862-0.34669-0.53864
   2   2 -11 6473.06 1580.60   1 0.95138-0.83393-0.07652 0.20293-0.29835-0.51320
   2  -2 -11 6624.51 1536.05   1 0.95792-0.84047-0.09576-0.03064-0.27057-0.54098
   2   2 -1011268.08 2444.67   1 0.96247-0.83916-0.11049 0.23690-0.24784-0.48956
   2  -2 -10 9164.61 1719.02   1 0.96895-0.84564-0.13993 0.01352-0.20382-0.53358
  -2   2  1013058.81 1181.80   1 0.65017-0.77451 0.65345-0.52696 0.38765 0.34991
   2   2  -937523.63 2751.41   1 0.96988-0.84064-0.14554 0.27195-0.19530-0.46835
   2  -2  -933915.26 2885.97   1 0.97358-0.84434-0.18679 0.06038-0.13128-0.53238
  -2   2   938653.42 2425.94   1 0.68295-0.81310 0.62941-0.50292 0.37068 0.29313
   2   2  -936540.81 2328.06   1 0.27592-0.14604 0.95351-0.82719-0.12109-0.54259
   2   2  -8173436.313981.47   1 0.97342-0.83825-0.18138 0.30779-0.13982-0.45010
   2  -2  -8153909.3 7651.92   1 0.97033-0.83516-0.23633 0.10992-0.05102-0.53890
  -2   2   8174580.614043.41   1 0.70800-0.84395 0.60949-0.48300 0.35671 0.23334
   2   2  -8157381.0 7787.79   1 0.38129-0.24558 0.92364-0.79732-0.03861-0.55133
  -2   2   8159732.6 7821.35   1 0.55212-0.68777-0.59949 0.72584 0.57945 0.01051
   2   2  -7 9253.60 1102.94   1 0.97253-0.83143-0.21841 0.34482-0.08051-0.43567
   2  -2  -710540.62 1404.01   1 0.95624-0.81516-0.28987 0.16347 0.03944-0.55567
  -2  -2   710700.39  478.41   1 0.12270-0.26414 0.83784-0.96435 0.53193-0.01565
  -2   2   7 9093.70  599.79   1 0.72531-0.86706 0.59485-0.46836 0.34650 0.16979
   2   2  -7 7892.12  429.73   1 0.48932-0.34769 0.87041-0.74407 0.05430-0.57049
  -2   2   7 8356.20  321.13   1 0.79079-0.93220 0.46740-0.34106 0.39518 0.12107
  -2   2   7 8026.36  324.90   1 0.58987-0.73151-0.55144 0.67782 0.58988-0.07375
   2   2  -610500.37 1363.31   1 0.96616-0.81918-0.25740 0.38380-0.01630-0.42617
  -2   2   6 9175.82  618.77   1 0.73429-0.88185 0.58695-0.46046 0.34101 0.10153
   2   2  -6 7882.63  394.31   1 0.60113-0.45367 0.78294-0.65661 0.16007-0.60252
  -2   2   6 9110.40  328.90   1 0.78743-0.93471 0.47775-0.35141 0.38948 0.05301
  -2   2   6 9117.40  331.91   1 0.68429-0.83175-0.40371 0.53009 0.60725-0.16485
   2   2  -558707.48 1901.64   1 0.95277-0.79988-0.29868 0.42508 0.05491-0.42364
   2  -2  -578207.85 1973.45   1 0.87361-0.72068-0.40840 0.28203 0.26456-0.63329
  -2   2   558588.68 1612.33   1 0.73355-0.88691 0.58761-0.46112 0.34146 0.02731
   2   2  -557903.18 1420.65   1 0.82730-0.67387 0.49023-0.36374 0.27429-0.64310
   2   2  -560775.28 1527.80   1 0.70863-0.55535 0.64812-0.52174 0.27887-0.64758
  -2  -2   572771.14 1784.04   1 0.81967-0.97266-0.01495-0.11142 0.57263-0.20375
   2  -2  -4 2417.52  194.16   1 0.78229-0.62343-0.47230 0.34589 0.40611-0.70120
  -2  -2   4 2468.99  182.16   1-0.06500-0.09396 0.83811-0.96456 0.54160-0.24653
   2   2  -4 1533.29  210.84   1 0.61493-0.45577 0.67697-0.55048 0.40442-0.69945
  -2   2   4 1129.82  289.79   1 0.72047-0.87963 0.59902-0.47253 0.34940-0.05437
   2   2  -4 1164.80  175.08   1 0.79611-0.63708 0.45008-0.32374 0.40450-0.69950
  -2  -2   4 2665.06  215.48   1 0.79562-0.95470-0.12520-0.00121 0.59271-0.29756
   2   2  -394869.89 1551.70   1 0.89051-0.72583-0.39194 0.51831 0.23099-0.45223
   2  -2  -399197.14 1539.36   1 0.63151-0.46676-0.53079 0.40438 0.56519-0.78651
  -2   2   388765.06 1388.76   1 0.31093-0.47586-0.56598 0.69243 0.76353-0.54229
  -2  -2   394719.18 1447.96   1-0.18799 0.02319 0.82191-0.94833 0.53769-0.31641
   2   2  -387939.62 1335.93   1 0.33325-0.16837 0.80065-0.67415 0.49788-0.71914
  -2   2   389494.19 1540.63   1 0.69048-0.85544 0.62357-0.49708 0.36657-0.14530
   2  -2  -390407.38 1441.42   1 0.88618-0.72121 0.40828-0.53476 0.21903-0.44031
  -2   2   389678.02 1248.83   1 0.35627-0.52116 0.93253-0.80620-0.05878 0.28001
   2   2  -390254.14 1387.66   1 0.83510-0.67020 0.18310-0.05674 0.51872-0.74000
  -2  -2   398288.93 1497.43   1 0.74571-0.91066-0.27516 0.14874 0.60679-0.38542
   2   2  -2180096.0 2655.22   1 0.82544-0.65488-0.44620 0.57257 0.34574-0.49323
   2  -2  -2201231.7 2903.56   1 0.40092-0.23012-0.56465 0.43820 0.72140-0.86892
  -2   2   2174735.0 2533.83   1 0.11071-0.28147-0.55075 0.67717 0.82729-0.67986
  -2  -2   2205733.4 2959.07   1-0.32769 0.15702 0.78730-0.91373 0.52226-0.37474
   2   2  -2181269.1 2615.93   1 0.03821 0.13249 0.84156-0.71511 0.53880-0.68633
  -2   2   2175003.1 2632.33   1 0.63607-0.80684 0.66313-0.53664 0.39453-0.24702
  -2   2   2174821.8 2458.57   1 0.49758-0.66835 0.86521-0.73887 0.06170 0.08577
   2  -2  -2202257.7 2817.50   1 0.82741-0.65661 0.29795-0.42431 0.47603-0.62355
   2   2  -2174695.7 2523.74   1 0.79703-0.62629-0.12148 0.24785 0.59158-0.73913
  -2  -2   2203748.3 2919.35   1 0.65830-0.82905-0.44917 0.32279 0.60404-0.45657
   2   2  -133998.80  637.60   1 0.71342-0.53693-0.50405 0.63047 0.48676-0.56054
  -2   2   132167.36  585.53   1-0.14765-0.02887-0.49699 0.62341 0.85510-0.78135
  -2  -2   141049.53  749.01   1-0.46714 0.29075 0.73269-0.85909 0.49491-0.42119
   2   2  -133765.14  617.18   1-0.21238 0.38891 0.81717-0.69074 0.53583-0.60959
   2  -2  -139074.94  727.19   1 0.72241-0.54584 0.59736-0.72385 0.34824-0.42200
  -2   2   135534.60  614.13   1 0.49599-0.67258 0.86623-0.73989 0.06026 0.01347
   2  -2  -140571.63  661.99   1 0.72086-0.54428 0.62762-0.75400 0.29399-0.36774
   2   2  -136016.57  670.97   1 0.68742-0.51084-0.39792 0.52430 0.60754-0.68127
  -2  -2   0164797.9 2368.63   1 0.25607-0.43850-0.56425 0.43780 0.78488-0.78488
  -2   2   0166956.1 2424.09   1-0.41264 0.23026-0.40052 0.52695 0.81810-0.81810
  -2  -2   0172361.5 2546.80   1-0.59435 0.41206 0.66246-0.78886 0.45594-0.45594
  -2   2   0174311.1 2571.26   1 0.40476-0.58719 0.77844-0.65192 0.47978-0.47978
   2  -2   0155464.2 2292.60   1 0.60774-0.42537 0.68150-0.80799 0.40767-0.40767
   2  -2   0159053.8 2311.19   1 0.64487-0.46246 0.73595-0.86232 0.20619-0.20619
  -2  -2   0163941.4 2394.54   1 0.39112-0.57353-0.75947 0.63311 0.51982-0.51982
   2   2   1317749.4 4443.15   1 0.21549-0.02722-0.56176 0.68822 0.79873-0.72498
  -2  -2  -1301665.0 4209.34   1-0.15325-0.03497-0.49540 0.36898 0.85503-0.92877
  -2   2  -1308110.1 4363.45   1-0.62594 0.43772-0.28388 0.41026 0.72636-0.80004
  -2  -2  -1318193.1 4543.27   1-0.70241 0.51425 0.58207-0.70845 0.40963-0.48335
  -2   2  -1315533.4 4460.55   1 0.20107-0.38939 0.82872-0.70221 0.52228-0.59604
   2  -2   1319249.0 4510.19   1 0.47582-0.28755 0.75058-0.87709 0.45849-0.38472
  -2   2  -1319195.1 4570.86   1 0.44454-0.63278 0.89564-0.76932 0.01417-0.08791
   2  -2   1320057.8 4550.26   1 0.60724-0.41899 0.77692-0.90326 0.16625-0.09251
   2   2   2177640.1 2543.47   1-0.12833 0.32241-0.50232 0.62874 0.85510-0.70761
  -2  -2  -2169550.3 2421.58   1-0.56196 0.36788-0.32355 0.19713 0.76124-0.90873
   2  -2   2171933.3 2567.35   1-0.58034 0.77444-0.31259 0.18621 0.75198-0.60461
   2   2   2168774.7 2516.93   1-0.58797 0.78207 0.66654-0.54013 0.45826-0.31082
  -2   2  -2169645.4 2461.38   1-0.05977-0.13441 0.83850-0.71205 0.54160-0.68913
   2  -2   2168590.8 2456.02   1 0.33770-0.14352 0.79942-0.92593 0.49687-0.34935
  -2   2  -2165697.9 2497.71   1 0.41042-0.60449 0.91177-0.78545-0.01464-0.13284
   2   2   329601.93  596.68   1-0.39001 0.58994-0.41060 0.53702 0.82419-0.60296
   2  -2   327477.62  730.23   1-0.66973 0.86971-0.25387 0.12750 0.69785-0.47679
  -2  -2  -326398.27  506.95   1-0.80848 0.60854-0.13691 0.01051 0.57236-0.79345
  -2  -2  -328625.41  698.31   1-0.85946 0.65970 0.40991-0.53622 0.30542-0.52653
  -2   2  -329357.78  577.22   1-0.34297 0.14297 0.78238-0.65595 0.51985-0.74113
   2  -2   326747.19  521.41   1 0.20933-0.00929 0.82744-0.95395 0.52106-0.29979
  -2   2  -329752.33  740.31   1 0.37323-0.57314 0.92663-0.80031-0.04515-0.17607
   2   2   445524.92 1148.09   1 0.91994-0.71385-0.00909 0.13550-0.39194 0.68705
   2   2   447249.05 1215.44   1-0.54489 0.75067-0.33338 0.45980 0.76937-0.47441
  -2  -2  -453762.81 1731.36   1-0.91242 0.70679 0.32237-0.44868 0.25210-0.54691
  -2   2  -449755.98 1252.70   1-0.59858 0.39267 0.65971-0.53331 0.45438-0.74925
   2  -2   452790.17 1323.31   1 0.10318 0.10274 0.83911-0.96556 0.53407-0.23901
  -2   2  -447302.18 1341.96   1 0.33369-0.53943 0.93955-0.81323-0.07666-0.21830
   2   2   596312.79 2899.27   1 0.96223-0.75001-0.10958 0.23599-0.24917 0.61788
   2   2   5103525.7 3136.05   1-0.62854 0.84030-0.28217 0.40855 0.72478-0.35634
   2  -2   5104457.5 3244.32   1-0.75054 0.96230-0.19061 0.06423 0.63273-0.26429
  -2  -2  -5108005.7 3298.26   1-0.95120 0.73963 0.23605-0.36233 0.19869-0.56714
  -2   2  -5103804.5 3101.45   1-0.79197 0.58022 0.49472-0.36834 0.35780-0.72640
   2  -2   5103242.2 3085.89   1 0.02805 0.18373 0.84162-0.96807 0.53933-0.17050
  -2   2  -5103842.4 3608.98   1 0.29213-0.50371 0.95016-0.82384-0.10881-0.25990
   2   2   611114.55  625.86   1-0.67267 0.89032-0.25176 0.37813 0.69578-0.25365
   2  -2   614740.40  825.35   1-0.76538 0.98298-0.17783 0.05144 0.61852-0.17635
  -2  -2  -615452.23  743.90   1-0.97785 0.76038 0.15050-0.27678 0.14540-0.58754
  -2   2  -611854.53  698.18   1-0.91606 0.69869 0.31531-0.18900 0.24777-0.68999
   2  -2   611802.16  498.05   1-0.01600 0.23366 0.84087-0.96732 0.54099-0.09839
  -2   2  -611068.94 1680.19   1 0.24929-0.46681 0.95799-0.83163-0.14175-0.30078
   2   2   7  557.11  232.80   1-0.69377 0.91730-0.23622 0.36259 0.68034-0.16452
   2  -2   7 4718.62  731.90   1-0.77066 0.99414-0.17308 0.04669 0.61328-0.09742
  -2  -2  -7 4733.62  604.38   1-0.99370 0.76994 0.06134-0.18775 0.09369-0.60986
  -2   2  -7 1170.60  238.36   1-0.98120 0.75782 0.13636-0.01008 0.13654-0.65237
   2  -2   7 2826.05  210.09   1-0.03120 0.25474 0.84023-0.96668 0.54132-0.02495
  -2   2  -7 2504.76  384.54   1 0.20426-0.42763 0.96322-0.83686-0.17455-0.34174
   2   2   839097.60 2194.80   1-0.70059 0.93000-0.23105 0.35742 0.67511-0.08560
   2  -2   835867.54 2118.01   1-0.76915 0.99852-0.17444 0.04805 0.61479-0.02523
  -2   2  -836317.16 1968.59   1-0.99859 0.76890-0.04642 0.17284 0.02564-0.61556
  -2  -2  -834539.96 1938.50   1-0.99891 0.76922-0.02284-0.10356 0.04061-0.63053
  -2   2  -840917.35 2383.80   1 0.15755-0.38677 0.96545-0.83909-0.20753-0.38252
   2   2   9 9983.21 1269.25   1-0.69768 0.93298-0.23327 0.35964 0.67736-0.01416
   2  -2   9 6334.64  932.24   1-0.76240 0.99765-0.18048 0.05408 0.62142 0.04182
  -2  -2  -9 5377.24  705.19   1-0.99427 0.75865-0.10614-0.02027-0.01247-0.65117
  -2   2  -9 9644.93 1502.61   1 0.10916-0.34424 0.96446-0.83809-0.24062-0.42319
   2   2  10 1936.96  489.25   1-0.68746 0.92865-0.24094 0.36731 0.68508 0.05180
   2  -2  10 3687.96  817.10   1-0.75127 0.99245-0.18998 0.06361 0.63205 0.10482
  -2   2 -10 2369.99  649.20   1 0.05904-0.29996 0.95997-0.83361-0.27377-0.46379
   2   2  1128475.81 3325.46   1-0.67123 0.91830-0.25279 0.37917 0.69680 0.11376
   2  -2  1134582.51 5752.99   1-0.73627 0.98334-0.20265 0.07627 0.64561 0.16495
  -2   2 -1134298.34 5678.41   1 0.00585-0.25265 0.95182-0.82545-0.30658-0.50476
   2   3 -12  415.21  399.86   1 0.93254-0.82100-0.03290 0.22251-0.35955-0.52577
   2   3 -11 9635.68 1773.44   1 0.94699-0.82954-0.06511 0.25473-0.31459-0.49696
   2  -3 -11 6153.27 1743.98   1 0.95661-0.83916-0.09163-0.09797-0.27657-0.53498
  -2   3  11 8629.17  953.50   1 0.66116-0.77970 0.64563-0.45590 0.38212 0.42920
   2   3 -1027973.89 3563.67   1 0.95840-0.83504-0.09730 0.28691-0.26832-0.46945
   2  -3 -1026212.64 1938.16   1 0.96873-0.84541-0.13867-0.05094-0.20573-0.53166
  -2   3  1030120.23 2244.75   1 0.69793-0.82227 0.61767-0.42793 0.36243 0.37513
   2   3 -1027148.16 1981.53   1 0.28998-0.16593 0.95063-0.76115-0.11045-0.62698
   2   3  -9 2867.45  919.16   1 0.96688-0.83764-0.12913 0.31875-0.22011-0.44355
   2  -3  -9 2653.32  442.82   1 0.97362-0.84438-0.18891-0.00070-0.12792-0.53573
  -2   3   9 1518.84  365.95   1 0.72773-0.85788 0.59274-0.40300 0.34503 0.31877
   2   3  -9 2095.14  481.57   1 0.38859-0.25871 0.92082-0.73134-0.03266-0.63103
   2   3  -8 4382.57  905.45   1 0.97201-0.83684-0.16188 0.35150-0.17024-0.41968
   2  -3  -8 7688.61 1199.52   1 0.96931-0.83414-0.24240 0.05278-0.04091-0.54901
  -2  -3   8 6641.52  678.53   1-0.30875 0.17327 0.79308-0.98272 0.52505 0.06502
  -2   3   8 4185.60  634.15   1 0.75102-0.88697 0.57165-0.38192 0.33041 0.25964
   2   3  -8 5977.44  664.35   1 0.48571-0.34991 0.87262-0.68311 0.05108-0.64102
  -2   3   8 3657.59  399.85   1 0.73265-0.86822-0.30623 0.49586 0.60781-0.01752
   2  -3  -751268.28 1787.78   1 0.95194-0.81086-0.30064 0.11104 0.05837-0.57459
  -2  -3   749814.07 1636.40   1-0.28437 0.14303 0.80000-0.98964 0.52831-0.01199
  -2   3   753787.84 1990.52   1 0.76788-0.90963 0.55540-0.36566 0.31918 0.19711
   2   3  -748506.05 1677.18   1 0.58236-0.44073 0.80053-0.61103 0.14136-0.65756
  -2   3   748249.26 1717.40   1 0.68013-0.82177 0.69084-0.50127 0.24525 0.27093
  -2   3   751880.64 1846.06   1 0.76617-0.90762-0.22105 0.41068 0.60341-0.08690
   2   3  -635316.46 1915.89   1 0.97128-0.82426-0.22971 0.41933-0.06197-0.38046
   2  -3  -627983.07 1174.31   1 0.91541-0.76843-0.36321 0.17361 0.17344-0.61592
  -2  -3   627937.28  973.73   1-0.30396 0.15675 0.79449-0.98412 0.52572-0.08316
  -2   3   635607.42 1398.67   1 0.77799-0.92554 0.54522-0.35548 0.31218 0.13036
  -2   3   633850.21 1128.66   1 0.56829-0.71575 0.81286-0.62335 0.12762 0.31482
  -2   3   633258.42 1109.94   1 0.81144-0.95850-0.05946 0.24902 0.58140-0.13875
   2   3  -527651.80 1098.15   1 0.96399-0.81111-0.26592 0.45552-0.00186-0.36686
   2  -3  -535980.12 1186.27   1 0.84921-0.69628-0.42896 0.23941 0.30793-0.67666
  -2  -3   533441.69 1051.42   1-0.35490 0.20183 0.77837-0.96801 0.51785-0.14905
   2   3  -529990.84  941.97   1 0.73215-0.57880 0.58885-0.39911 0.34233-0.71112
  -2   3   534492.67 1324.28   1 0.78046-0.93382 0.54268-0.35294 0.31043 0.05835
  -2   3   531089.95  957.96   1 0.32191-0.47513 0.94286-0.75338-0.08587 0.45459
   2   3  -531597.94 1047.28   1 0.75347-0.60032 0.56399-0.37448 0.33791-0.70666
  -2   3   531450.68  947.89   1 0.83516-0.98826 0.17625 0.01328 0.52099-0.15219
  -2  -3   529403.29  970.86   1 0.81411-0.96710-0.04599-0.14356 0.57887-0.20999
   2   3  -4260354.5 6354.38   1 0.95037-0.79159-0.30427 0.49388 0.06481-0.35980
   2  -3  -4242552.9 5693.73   1 0.73538-0.57651-0.49502 0.30539 0.46277-0.75786
  -2   3   4246989.3 5788.03   1 0.29062-0.44971-0.56556 0.75525 0.77179-0.47681
  -2  -3   4237145.6 5536.79   1-0.42614 0.26748 0.75085-0.94046 0.50459-0.20973
   2   3  -4254178.3 5911.87   1 0.42587-0.26680 0.77077-0.58100 0.47385-0.76892
  -2   3   4245794.0 5682.65   1 0.80887-0.96790 0.40216-0.21265 0.42893-0.13392
   2   3  -4264495.9 6201.92   1 0.81212-0.65309 0.38798-0.19847 0.43580-0.73080
  -2  -3   4219074.0 5148.05   1 0.79359-0.95267-0.13279-0.05683 0.59377-0.29862
   2   3  -3163596.7 2496.17   1 0.92761-0.76293-0.34598 0.53558 0.14081-0.36205
   2  -3  -3158343.8 2334.13   1 0.55248-0.38747-0.54784 0.35817 0.62818-0.84945
  -2   3   3163794.7 2403.37   1 0.12819-0.29316-0.55303 0.74265 0.82323-0.60209
  -2  -3   3166020.0 2427.22   1-0.51024 0.34567 0.71137-0.90098 0.48330-0.26215
   2   3  -3167499.6 2423.06   1 0.09209 0.07275 0.83978-0.65011 0.53504-0.75634
  -2   3   3168518.7 2610.90   1 0.75429-0.91925 0.56857-0.37883 0.32827-0.10700
  -2   3   3164906.2 2335.32   1 0.75848-0.92339 0.55287-0.36336 0.34499-0.12374
   2   3  -3163190.3 2429.43   1 0.83516-0.67026 0.17702 0.01251 0.52074-0.74202
  -2  -3   3153829.6 2282.91   1 0.75660-0.92155-0.24732 0.05769 0.60529-0.38393
   2  -3  -3163674.7 2306.60   1 0.67951-0.51458-0.41241 0.22284 0.60677-0.82797
   2   3  -2 2103.46  173.02   1 0.89031-0.71975-0.39214 0.58170 0.23141-0.37890
  -2  -3   2 1586.78  166.52   1 0.71902-0.88964-0.50184 0.31221 0.48079-0.33324
   2  -3  -2 1611.42  166.55   1 0.29221-0.12145-0.56561 0.37593 0.77116-0.91865
  -2   3   2 1710.05  167.80   1-0.08670-0.08405-0.51302 0.70265 0.85398-0.70655
  -2  -3   2 1757.44  210.21   1-0.59619 0.42571 0.66127-0.85088 0.45527-0.30783
   2   3  -2 2044.95  180.81   1-0.19327 0.36394 0.82093-0.63129 0.53732-0.68484
  -2   3   2 2070.13  286.93   1 0.71739-0.88816 0.60164-0.41190 0.35123-0.20372
  -2   3   2 1916.20  170.00   1 0.70716-0.87792 0.65049-0.46093 0.27707-0.12959
   2  -3  -2 1302.96  119.56   1 0.83261-0.66186 0.09631-0.28587 0.54541-0.69297
   2   3  -2 2203.70  246.37   1 0.81299-0.64225-0.05175 0.24131 0.57996-0.72751
  -2  -3   2 1678.02  222.88   1 0.69558-0.86633-0.38247 0.19290 0.60817-0.46070
   2   3  -1166609.0 2442.75   1 0.82709-0.65066-0.44508 0.63463 0.34323-0.41698
  -2  -3   1158748.1 2320.53   1 0.61278-0.78927-0.53560 0.34598 0.58105-0.50728
   2  -3  -1160523.1 2356.38   1-0.01007 0.18662-0.53027 0.34064 0.84776-0.92148
  -2   3   1156762.5 2287.52   1-0.32523 0.14869-0.43745 0.62708 0.83836-0.76462
  -2  -3   1167301.0 2485.95   1-0.67719 0.50083 0.60290-0.79246 0.42180-0.34808
   2   3  -1163617.0 2399.59   1-0.39986 0.57624 0.76147-0.57186 0.51015-0.58387
   2  -3  -1154214.0 2304.58   1 0.83469-0.65816 0.48106-0.67079 0.26807-0.34183
  -2   3   1165953.7 2408.67   1 0.65884-0.83542 0.71897-0.52940 0.22137-0.14763
   2  -3  -1158801.8 2292.44   1 0.81036-0.63371 0.39580-0.58531 0.43203-0.50578
   2   3   0165348.2 2389.25   1 0.71373-0.53136-0.50393 0.69356 0.48644-0.48644
  -2  -3   0168957.9 2428.56   1 0.39758-0.57996-0.56481 0.37513 0.72312-0.72312
  -2  -3   0172694.0 2583.04   1-0.74994 0.56768 0.53863-0.72820 0.38400-0.38400
   2  -3   0157787.6 2313.38   1 0.76003-0.57750 0.54935-0.73886 0.34721-0.34721
  -2  -3   0162850.5 2413.09   1 0.49738-0.67980-0.66123 0.47169 0.56158-0.56158
   2   3   140886.93  678.87   1 0.50480-0.31663-0.55528 0.74495 0.66093-0.58717
  -2  -3  -141168.31  673.17   1 0.00097-0.18911-0.53248 0.34286 0.84643-0.92015
   2  -3   144507.39  857.32   1-0.47927 0.66750-0.36856 0.17892 0.79652-0.72278
  -2   3  -140887.47  754.77   1-0.70079 0.51257-0.23089 0.42046 0.67495-0.74864
  -2  -3  -145309.80 1155.42   1-0.81291 0.62489 0.47117-0.66064 0.34228-0.41598
   2   3   142588.48  806.48   1-0.62053 0.80868 0.64494-0.45537 0.44608-0.37236
  -2   3  -141523.33  787.86   1 0.39484-0.58310 0.78187-0.59210 0.48246-0.55623
   2  -3   144054.55  811.28   1 0.68971-0.50153 0.62418-0.81391 0.36700-0.29324
  -2   3  -142255.73  825.16   1 0.56652-0.75477 0.81436-0.62486 0.12591-0.19965
   2   3   2100779.2 1483.80   1 0.17514 0.01895-0.55830 0.74798 0.81093-0.66344
  -2  -3  -284519.26 1248.54   1-0.49406 0.29998-0.36097 0.17134 0.79094-0.93843
   2  -3   285950.53 1434.36   1-0.60532 0.79942-0.29717 0.10760 0.73842-0.59105
  -2   3  -295666.39 1476.26   1 0.16826-0.36244 0.83320-0.64343 0.52674-0.67425
  -2   3  -2101044.5 1650.84   1 0.52092-0.71500 0.84956-0.66005 0.08293-0.23042
   2   3   2103715.2 1680.91   1 0.48300-0.28889-0.67608 0.86562 0.55643-0.40894
   2   3   3132250.8 3109.55   1-0.16750 0.36743-0.49128 0.68092 0.85473-0.63351
   2  -3   3109623.4 2704.28   1-0.68196 0.88195-0.24500 0.05544 0.68912-0.46805
  -2  -3  -3130126.0 3055.55   1-0.81345 0.61350-0.13184-0.05774 0.56649-0.78757
  -2  -3  -3135316.9 3297.15   1-0.90862 0.70886 0.32955-0.51903 0.25650-0.47761
  -2   3  -3129998.5 3082.73   1-0.12121-0.07884 0.83243-0.64276 0.54069-0.76199
   2  -3   3130272.6 3091.09   1 0.51518-0.31523 0.73250-0.92227 0.44500-0.22369
   2   3   3140361.2 3436.30   1 0.42024-0.22029-0.73503 0.92457 0.53208-0.31084
   2   3   438393.27  966.57   1 0.93697-0.73089-0.04211 0.23172-0.34683 0.64195
   2   3   437229.32  961.78   1-0.40170 0.60747-0.40544 0.59508 0.82112-0.52615
   2  -3   435320.04 1123.06   1-0.72741 0.93329-0.20992 0.02036 0.65329-0.35854
  -2  -3  -438225.09 1098.37   1-0.94264 0.73696 0.25773-0.44716 0.21212-0.50687
  -2   3  -439341.49  999.10   1-0.43305 0.22714 0.74793-0.55832 0.50305-0.79792
   2  -3   435581.58  924.14   1 0.43382-0.22804 0.76775-0.95752 0.47153-0.17645
   2   3   518915.58  722.98   1 0.97070-0.75848-0.15110 0.34071-0.18682 0.55552
   2   3   519636.34  715.44   1-0.53312 0.74475-0.33998 0.52962 0.77471-0.40600
   2  -3   519626.65  847.56   1-0.75341 0.96517-0.18813-0.00142 0.63005-0.26161
  -2  -3  -518101.69  785.46   1-0.96836 0.75679 0.18529-0.37471 0.16714-0.53559
  -2   3  -520261.44  687.63   1-0.70339 0.49164 0.58123-0.39167 0.40914-0.77773
   2  -3   517704.14  609.24   1 0.36758-0.15582 0.79058-0.98034 0.48975-0.12097
  -2   3  -521664.36 1834.68   1 0.38175-0.59333 0.92347-0.73398-0.03824-0.33047
   2   3   648099.16 1623.14   1 0.97159-0.75344-0.22726 0.41688-0.06600 0.50845
   2   3   656128.87 1908.60   1-0.60247 0.82012-0.29896 0.48852 0.74002-0.29789
   2  -3   653810.05 1958.37   1-0.76690 0.98450-0.17646-0.01312 0.61702-0.17485
  -2  -3  -655014.33 2005.48   1-0.98615 0.76868 0.11266-0.30208 0.12166-0.56380
  -2   3  -654862.14 1838.08   1-0.88869 0.67132 0.36464-0.17516 0.27794-0.72016
   2  -3   652239.47 1729.23   1 0.32556-0.10794 0.80275-0.99251 0.49959-0.05706
  -2   3  -657055.00 2070.02   1 0.33358-0.55099 0.93959-0.75010-0.07675-0.36570
   2   3   7169568.4 6025.61   1-0.63785 0.86138-0.27597 0.46554 0.71900-0.20319
   2  -3   7191283.5 6914.18   1-0.77170 0.99519-0.17213-0.01745 0.61224-0.09638
  -2  -3  -7177861.2 6355.77   1-0.99636 0.77259 0.03550-0.22512 0.07746-0.59364
   2  -3   7165626.2 5820.59   1 0.31253-0.08905 0.80616-0.99593 0.50241 0.01387
  -2   3  -7164497.6 6116.45   1 0.28434-0.50758 0.95183-0.76235-0.11473-0.40146
   2   3   8 2616.99  420.86   1-0.65278 0.88219-0.26580 0.45536 0.70938-0.11987
   2  -3   8 3473.85  551.69   1-0.77020 0.99957-0.17349-0.01609 0.61374-0.02418
  -2  -3  -8 2636.48  403.64   1-0.99879 0.76910-0.03804-0.15157 0.03097-0.62088
  -2   3  -8 2122.77  438.33   1 0.23445-0.46368 0.96006-0.77051-0.15267-0.43738
   2   3   9 4987.14  513.32   1-0.65445 0.88975-0.26464 0.45420 0.70827-0.04507
   2  -3   9 4005.08  595.87   1-0.76375 0.99901-0.17927-0.01031 0.62010 0.04314
  -2  -3  -9 3710.93  390.71   1-0.99360 0.75799-0.11172-0.07789-0.01606-0.64759
  -2   3  -9 4026.61  581.20   1 0.18276-0.41783 0.96465-0.77510-0.18986-0.47395
   2   3  10 2932.09  722.58   1-0.64663 0.88781-0.27002 0.45959 0.71340 0.02348
   2  -3  10  410.43  430.34   1-0.75312 0.99430-0.18838-0.00117 0.63033 0.10655
  -2   3 -10 2160.80  602.47   1 0.12962-0.37054 0.96528-0.77573-0.22676-0.51080
   2  -3  11 4018.21  820.59   1-0.73879 0.98586-0.20055 0.01099 0.64339 0.16717
  -2   3 -11 3627.33 1017.62   1 0.07488-0.32166 0.96177-0.77222-0.26342-0.54791
   2   3  11 4946.04  987.61   1 0.39538-0.14866-0.75600 0.94554 0.52165 0.28955
   2   4 -11 8056.09 2064.02   1 0.94132-0.82387-0.05167 0.30448-0.33352-0.47803
  -2   4  11 9620.65 1356.49   1 0.69720-0.81574 0.61826-0.36527 0.36285 0.44848
   2   4 -10 6946.70 1857.00   1 0.95320-0.82984-0.08158 0.33439-0.29109-0.44668
   2  -4 -10 9663.52 1256.17   1 0.96755-0.84424-0.13243-0.12039-0.21514-0.52225
  -2   4  10 8664.46  877.49   1 0.73052-0.85486 0.59030-0.33731 0.34333 0.39423
   2   4 -10 5959.87 1561.96   1 0.37711-0.25306 0.92521-0.67257-0.04201-0.69541
   2   4  -927878.04 3331.10   1 0.96256-0.83332-0.11082 0.36365-0.24734-0.41632
   2  -4  -934763.03 2916.30   1 0.97357-0.84433-0.18634-0.06647-0.13199-0.53167
  -2   4   928362.83 1581.87   1 0.75774-0.88789 0.56528-0.31229 0.32600 0.33781
   2   4  -927014.47 1403.39   1 0.46767-0.33769 0.88319-0.63052 0.03517-0.69885
   2  -4  -811186.72 1267.93   1 0.96898-0.83382-0.24417-0.00865-0.03795-0.55196
  -2   4   8 4834.96  660.47   1 0.77928-0.91522 0.54390-0.29091 0.31127 0.27878
   2   4  -8 4191.16  496.59   1 0.55600-0.42020 0.82306-0.57039 0.11580-0.70574
   2   4  -741618.90 1713.26   1 0.97278-0.83169-0.17048 0.42331-0.15689-0.35929
   2  -4  -739573.12 1522.03   1 0.94890-0.80782-0.30755 0.05475 0.07065-0.58687
  -2   4   741287.10 1807.22   1 0.79498-0.93686 0.52744-0.27447 0.29966 0.21665
  -2   4   735054.71 1267.29   1 0.46827-0.60991 0.88285-0.63018 0.03570 0.48049
   2   4  -738659.46 1505.22   1 0.63878-0.49714 0.74302-0.49026 0.19968-0.71587
  -2   4   738792.38 1405.81   1 0.81828-0.95942-0.02318 0.27593 0.57434-0.05791
   2   4  -6139397.8 4626.75   1 0.97355-0.82653-0.20073 0.45356-0.10908-0.33335
   2  -4  -6152586.8 4943.33   1 0.90577-0.75872-0.37498 0.12224 0.19736-0.63984
  -2  -4   6140802.6 4492.90   1-0.72607 0.57920 0.56118-0.81393 0.39735 0.04496
  -2   4   6161494.2 5351.20   1 0.80527-0.95292 0.51607-0.26310 0.29189 0.15067
   2   4  -6141665.4 4515.72   1 0.90274-0.75509 0.38057-0.12760 0.20051-0.64308
  -2   4   6138400.7 4428.72   1 0.23564-0.38295 0.95990-0.70717-0.15180 0.59434
   2   4  -6154950.4 5046.43   1 0.71385-0.56639 0.63955-0.38679 0.28526-0.72772
  -2   4   6143918.3 4597.35   1 0.83096-0.97803 0.07482 0.17792 0.55126-0.10861
   2   4  -599154.80 3089.81   1 0.97102-0.81807-0.23164 0.48446-0.05879-0.30991
   2  -4  -590402.78 2745.07   1 0.82561-0.67268-0.44609 0.19335 0.34549-0.71422
  -2  -4   587160.68 2598.46   1-0.70441 0.55165 0.58035-0.83311 0.40862-0.04003
   2   4  -588493.12 2628.03   1 0.58690-0.43367 0.69406-0.44103 0.41691-0.78575
  -2   4   592519.80 2939.31   1 0.80923-0.96266 0.51158-0.25861 0.28882 0.07997
  -2   4   579516.46 2354.36   1-0.10239-0.05082 0.92257-0.66983-0.37197 0.74076
   2   4  -588780.32 2747.43   1 0.77531-0.62215 0.51185-0.25917 0.36999-0.73875
  -2   4   589117.35 2645.60   1 0.83482-0.98792 0.19787 0.05484 0.51372-0.14492
   2   4  -463556.50 1717.81   1 0.96455-0.80577-0.26381 0.51661-0.00545-0.28953
   2  -4  -462905.14 1571.04   1 0.68893-0.53006-0.51312 0.26030 0.51192-0.80701
  -2   4   463294.86 1581.48   1 0.10671-0.26588-0.55020 0.80304 0.82818-0.53331
  -2  -4   463003.67 1552.50   1-0.71508 0.55642 0.57106-0.82381 0.40316-0.10829
   2   4  -465250.36 1587.72   1 0.20473-0.04571 0.82816-0.57514 0.52174-0.81677
  -2   4   465172.63 1780.41   1 0.80568-0.96488 0.51561-0.26264 0.29157 0.00346
   2   4  -463577.26 1631.71   1 0.81793-0.65893 0.35892-0.10620 0.44962-0.74466
  -2   4   464472.48 1559.78   1 0.82385-0.98285 0.32392-0.07120 0.46511-0.17007
   2  -4  -461212.20 1469.91   1 0.46024-0.30121-0.69851 0.44579 0.54794-0.84293
   2   4  -3 8302.19 1064.84   1 0.95320-0.78852-0.29764 0.55044 0.05306-0.27430
   2  -4  -3 9502.45  380.59   1 0.47776-0.31274-0.55857 0.30568 0.67803-0.89930
  -2   4   3 6351.73  313.37   1-0.07231-0.09265-0.51651 0.76935 0.85321-0.63207
  -2  -4   310275.87  390.86   1-0.74193 0.57737 0.54637-0.79912 0.38859-0.16743
   2   4  -3 6383.13  285.89   1-0.12560 0.29045 0.83188-0.57897 0.54055-0.76185
  -2   4   3 6865.15  542.37   1 0.79248-0.95746 0.53014-0.27717 0.30151-0.08023
  -2   4   3 6733.69  263.69   1 0.79917-0.96407 0.43951-0.18683 0.41006-0.18880
   2   4  -3 6399.51  381.47   1 0.83507-0.67017 0.18560 0.06710 0.51788-0.73916
   2  -4  -3 9954.24  351.81   1 0.71624-0.55129-0.34227 0.08943 0.60814-0.82950
   2   4  -2123560.5 3022.66   1 0.93489-0.76431-0.33432 0.58712 0.11916-0.26665
   2  -4  -2105051.0 2516.40   1 0.20017-0.02941-0.56056 0.30765 0.80355-0.95104
  -2   4   2118391.6 2819.79   1-0.27925 0.10856-0.45475 0.70760 0.84570-0.69821
  -2  -4   2110318.3 2661.11   1-0.77660 0.60614 0.51145-0.76421 0.36782-0.22038
   2   4  -2118949.6 2834.61   1-0.36536 0.53603 0.77473-0.52188 0.51603-0.66355
  -2   4   2126083.8 2998.47   1 0.76522-0.93599 0.53719-0.28451 0.35476-0.20726
   2   4  -2125616.8 3041.69   1 0.82256-0.65182 0.00341 0.24933 0.56866-0.71621
   2  -4  -2102875.7 2448.00   1 0.82120-0.65046-0.00546-0.24728 0.57060-0.71815
   2   4  -156563.83 1052.78   1 0.90537-0.72893-0.37546 0.62820 0.19830-0.27204
  -2  -4   153631.12  901.42   1 0.67592-0.85242-0.51754 0.26471 0.52465-0.45088
   2  -4  -154549.04  938.28   1-0.09158 0.26814-0.51181 0.25897 0.85420-0.92791
  -2   4   155276.98  928.06   1-0.47968 0.30314-0.36835 0.62120 0.79637-0.72263
  -2  -4   153997.86 1003.88   1-0.81448 0.63820 0.46928-0.72191 0.34115-0.26745
   2   4  -156433.67  976.40   1-0.52404 0.70042 0.70404-0.45123 0.47926-0.55298
  -2   4   156563.51 1081.20   1 0.72000-0.89656 0.59942-0.34644 0.34969-0.27593
  -2   4   156446.17  973.93   1 0.72610-0.90268 0.61838-0.36563 0.30062-0.22688
   2  -4  -152661.73  883.85   1 0.83303-0.65633 0.23778-0.49050 0.49950-0.57326
   2   4  -158674.93 1072.12   1 0.78203-0.60533-0.17288 0.42572 0.59877-0.67255
   2   4   016733.58  400.68   1 0.85484-0.67253-0.42451 0.67725 0.29838-0.29838
  -2   4   016655.32  414.00   1-0.64356 0.46123-0.27211 0.52487 0.71538-0.71538
  -2  -4   022687.68  604.15   1-0.85115 0.66900 0.42171-0.67434 0.31255-0.31255
   2   4   016655.55  435.30   1-0.62434 0.80660 0.64229-0.38954 0.44457-0.44457
  -2   4   016905.58  531.83   1 0.64489-0.82726 0.65711-0.40413 0.39026-0.39026
   2  -4   022043.42  553.91   1 0.86922-0.68692 0.43421-0.68718 0.23644-0.23644
  -2   4   017133.15  487.89   1 0.68380-0.86621 0.68568-0.43293 0.24947-0.24947
   2  -4   021989.62  485.89   1 0.81089-0.62836 0.39348-0.64616 0.43315-0.43315
   2   4   017219.61  508.27   1 0.72232-0.53974-0.32927 0.58210 0.60813-0.60813
   2   4   127151.88  707.88   1 0.65421-0.46599-0.45596 0.70872 0.60341-0.52968
   2   4   248953.94 1180.93   1 0.55547-0.36151-0.54730 0.80020 0.62602-0.47851
  -2  -4  -247290.32 1138.55   1-0.42069 0.22661-0.39685 0.14400 0.81579-0.96328
   2  -4   247710.13 1294.22   1-0.61623 0.81033-0.29020 0.03745 0.73214-0.58476
  -2  -4  -244568.45 1514.88   1-0.91622 0.72234 0.31500-0.56763 0.24758-0.39499
  -2   4  -248219.69 1248.43   1 0.34485-0.53902 0.79739-0.54437 0.49522-0.64273
   2  -4   245999.32 1180.67   1 0.78557-0.59159 0.53736-0.79034 0.30678-0.15926
  -2   4  -248108.87 1316.99   1 0.59417-0.78824 0.78963-0.53696 0.15307-0.30056
   2   4   250801.67 1378.31   1 0.58913-0.39510-0.55242 0.80518 0.58969-0.44222
   2   4   320373.38  542.90   1 0.20392-0.00398-0.56087 0.81377 0.80239-0.58116
   2  -4   317327.36  638.02   1-0.68471 0.88470-0.24297-0.00977 0.68711-0.46604
  -2  -4  -318219.03  484.27   1-0.84042 0.64047-0.10276-0.15001 0.53209-0.75318
  -2  -4  -318421.16  672.65   1-0.94260 0.74283 0.25783-0.51039 0.21217-0.43324
  -2   4  -320332.00  616.32   1 0.08735-0.28741 0.84004-0.58714 0.53544-0.75674
   2  -4   316862.11  527.93   1 0.74386-0.54408 0.57830-0.83128 0.33501-0.11373
  -2   4  -315721.49  685.42   1 0.54754-0.74745 0.82980-0.57713 0.10776-0.32899
   2   4   322593.14  824.09   1 0.53325-0.33330-0.62177 0.87449 0.57361-0.35237
   2   4   430840.71  964.20   1 0.96160-0.75530-0.10723 0.36006-0.25263 0.54760
   2   4   430733.21  961.41   1-0.14429 0.35007-0.49793 0.75078 0.85512-0.56015
   2  -4   427843.92 1057.90   1-0.72634 0.93221-0.21079-0.04195 0.65420-0.35945
  -2  -4  -426887.87 1074.44   1-0.96427 0.75859 0.19853-0.45109 0.17539-0.47015
  -2   4  -432224.77 1023.05   1-0.23731 0.03144 0.81177-0.55892 0.53358-0.82862
   2  -4   426938.28  879.83   1 0.70820-0.50262 0.60932-0.86230 0.35659-0.06156
  -2   4  -433362.26 1215.25   1 0.49989-0.70562 0.86373-0.61106 0.06377-0.35874
   2   4   433361.18 1230.44   1 0.48990-0.28410-0.66902 0.92174 0.55892-0.26394
   2   4   551380.00 1725.16   1 0.97225-0.76003-0.22134 0.47416-0.07572 0.44442
   2   4   555310.23 1861.53   1-0.36505 0.57668-0.42127 0.67412 0.83021-0.46150
   2  -4   539414.92 1514.66   1-0.75071 0.96247-0.19046-0.06228 0.63257-0.26413
  -2  -4  -540093.52 1504.90   1-0.98090 0.76933 0.13766-0.39022 0.13736-0.50581
  -2   4  -557752.33 1926.73   1-0.57804 0.36622 0.67277-0.41996 0.46178-0.83036
   2  -4   537992.07 1299.89   1 0.68540-0.47401 0.62753-0.88051 0.36935-0.00056
  -2   4  -552337.76 1901.67   1 0.45171-0.66328 0.89193-0.63928 0.02033-0.38904
   2   4   557050.40 2101.35   1 0.45921-0.24757-0.69950 0.95222 0.54755-0.17882
   2   4   6 1417.76  253.58   1 0.95526-0.73747-0.29247 0.54527 0.04398 0.39849
   2   4   6 2913.37  262.46   1-0.48522 0.70270-0.36553 0.61838 0.79431-0.35186
   2  -4   6 2348.72  438.52   1-0.76368 0.98128-0.17934-0.07343 0.62018-0.17801
  -2  -4  -6 2891.44  533.47   1-0.99234 0.77449 0.07200-0.32483 0.10036-0.54280
  -2   4  -6 2198.73  168.98   1-0.85108 0.63371 0.42181-0.16918 0.31262-0.75484
   2  -4   6 2969.57  205.19   1 0.68508-0.46789 0.62778-0.88076 0.36953 0.07301
  -2   4  -6 2153.59  408.46   1 0.40200-0.61941 0.91538-0.66273-0.02162-0.42083
   2   4   6 1963.26  354.43   1 0.44020-0.22272-0.71725 0.96997 0.54014-0.09766
   2   4   762641.75 3134.20   1-0.54812 0.77145-0.33154 0.58439 0.76787-0.25168
   2  -4   772175.01 3729.09   1-0.76850 0.99198-0.17503-0.07774 0.61544-0.09958
  -2  -4  -775700.86 3861.97   1-0.99815 0.77438 0.00812-0.26096 0.06021-0.57639
  -2   4  -768436.19 3526.68   1 0.35117-0.57441 0.93419-0.68155-0.06285-0.45334
   2   4   768122.33 3482.70   1 0.43144-0.20810-0.72517 0.97789 0.53663-0.02041
   2   4   829926.18 1880.59   1-0.57809 0.80750-0.31394 0.56669 0.75315-0.16364
   2  -4   834576.59 2298.50   1-0.76731 0.99668-0.17609-0.07668 0.61661-0.02705
  -2  -4  -835183.00 2218.07   1-0.99820 0.76851-0.05669-0.19613 0.01911-0.60902
  -2   4  -828941.23 3119.54   1 0.29912-0.52820 0.94858-0.69594-0.10347-0.48647
   2   4   830987.56 2001.91   1 0.43146-0.20228-0.72515 0.97787 0.53664 0.05332
   2   4   927944.14 2237.55   1-0.58871 0.82401-0.30750 0.56025 0.74756-0.08437
   2  -4   929745.98 2473.59   1-0.76135 0.99661-0.18140-0.07137 0.62243 0.04081
  -2   4  -927471.38 2292.64   1 0.24630-0.48138 0.95844-0.70570-0.14396-0.51985
   2   4   930388.56 2501.15   1 0.43899-0.20396-0.71836 0.97108 0.53966 0.12405
   2  -4  10 1082.65  601.09   1-0.75131 0.99250-0.18994-0.06280 0.63201 0.10487
  -2   4 -10  812.62  360.70   1 0.19154-0.43247 0.96415-0.71141-0.18363-0.55393
   2   4  10  582.04  499.13   1 0.45298-0.21210-0.70541 0.95813 0.54515 0.19230
   2  -4  11 3990.82  856.72   1-0.73768 0.98475-0.20148-0.05127 0.64437 0.16619
  -2   4 -11 3814.75  984.44   1 0.13519-0.38197 0.96540-0.71267-0.22295-0.58837
   2   4  11 5008.49  967.39   1 0.47261-0.22589-0.68648 0.93920 0.55261 0.25859
   2   5 -1117212.59 1600.47   1 0.93424-0.81679-0.03638 0.35240-0.35476-0.45679
  -2   5  1115402.86 1468.72   1 0.72202-0.84056 0.59769-0.28146 0.34848 0.46284
   2   5 -1017236.28 2447.53   1 0.94657-0.82321-0.06407 0.38010-0.31606-0.42171
  -2   5  1021115.97 1743.20   1 0.75252-0.87686 0.57024-0.25401 0.32943 0.40814
   2   5 -1019213.65 1490.90   1 0.44165-0.31761 0.89710-0.58130 0.01170-0.74913
   2   5  -9 9711.64 1361.58   1 0.95651-0.82724-0.09132 0.40734-0.27703-0.38696
  -2   5   9 8852.27 1195.05   1 0.77755-0.90770 0.54566-0.22944 0.31248 0.35132
   2   5  -9 8888.61 1093.25   1 0.52437-0.39440 0.84711-0.53127 0.08611-0.74979
   2   5  -835822.29 3429.74   1 0.96430-0.82913-0.11768 0.43371-0.23719-0.35272
   2  -5  -828856.97 1894.23   1 0.96964-0.83447-0.24050-0.07552-0.04408-0.54583
  -2   5   834482.80 2298.36   1 0.79720-0.93332 0.52502-0.20880 0.29800 0.29208
   2   5  -834469.33 2182.37   1 0.60293-0.46713 0.78119-0.46534 0.16188-0.75182
   2   5  -770660.70 4339.25   1 0.96966-0.82857-0.14419 0.46022-0.19735-0.31883
   2  -5  -765096.06 3363.27   1 0.94789-0.80681-0.30973-0.00626 0.07454-0.59077
  -2   5   771194.66 3716.97   1 0.81223-0.95411 0.50814-0.19193 0.28648 0.22984
   2   5  -771952.75 3638.33   1 0.67424-0.53261 0.69891-0.38296 0.23856-0.75475
  -2   5   767734.61 3350.52   1 0.83202-0.97316 0.08797 0.22796 0.54772-0.03129
   2   5  -677746.50 2724.83   1 0.97278-0.82576-0.17041 0.48645-0.15699-0.28544
   2  -5  -666124.67 2215.15   1 0.89849-0.75143-0.38336 0.06743 0.21387-0.65634
  -2  -5   662753.78 2011.82   1-0.97150 0.82483 0.17447-0.49017 0.16039 0.28173
  -2   5   678952.31 2881.87   1 0.82219-0.96984 0.49642-0.18020 0.27850 0.16406
   2   5  -667324.03 2155.24   1 0.85140-0.70374 0.45927-0.14306 0.25333-0.69589
  -2   5   660912.82 1994.09   1-0.02209-0.12528 0.94581-0.62988-0.32396 0.76651
   2   5  -672448.47 2470.98   1 0.73673-0.58927 0.59863-0.28269 0.31440-0.75686
  -2   5   670102.59 2294.47   1 0.83498-0.98217 0.14932 0.16657 0.52963-0.08706
   2   5  -5 6054.16  684.52   1 0.97363-0.82068-0.19642 0.51245-0.11598-0.25271
   2  -5  -5 6189.26  367.08   1 0.80464-0.65171-0.45951 0.14358 0.37601-0.74474
  -2   5   5 3074.26  257.31   1 0.05328-0.20666-0.54204 0.85808 0.83866-0.47008
  -2  -5   5 6443.04  548.38   1-0.90907 0.75627 0.32871-0.64450 0.25599 0.11252
   2   5  -5 4126.30  227.02   1 0.39442-0.24119 0.78201-0.46572 0.48257-0.85142
  -2   5   5 3608.39  470.72   1 0.82667-0.98011 0.49099-0.17478 0.27481 0.09398
   2   5  -5 4486.38  392.83   1 0.78620-0.63304 0.48142-0.16557 0.38744-0.75619
  -2   5   5 4749.01  281.43   1 0.83370-0.98680 0.22633 0.08956 0.50369-0.13489
   2   5  -443646.59 1496.99   1 0.97215-0.81327-0.22231 0.53834-0.07413-0.22082
   2  -5  -457339.79 1762.55   1 0.64602-0.48716-0.52676 0.21072 0.55241-0.84750
  -2   5   441828.87 1315.17   1-0.09712-0.06204-0.51042 0.82646 0.85442-0.55955
  -2  -5   455957.08 1804.87   1-0.88374 0.72508 0.37277-0.68855 0.28289 0.01192
   2   5  -442389.22 1311.92   1-0.00195 0.16093 0.84129-0.52516 0.54057-0.83564
  -2   5   444887.08 1649.73   1 0.82482-0.98402 0.49325-0.17704 0.27635 0.01869
   2   5  -442054.10 1421.07   1 0.81997-0.66097 0.34770-0.03180 0.45469-0.74973
  -2   5   440833.39 1286.80   1 0.82555-0.98454 0.31219 0.00370 0.47010-0.17506
   2  -5  -456982.20 1735.89   1 0.55278-0.39375-0.59869 0.28279 0.57965-0.87463
   2   5  -365766.35 1776.09   1 0.96819-0.80339-0.24825 0.56428-0.03111-0.19010
   2  -5  -383318.78 2029.06   1 0.41239-0.24738-0.56403 0.24791 0.71539-0.93666
  -2   5   365438.28 1615.56   1-0.27366 0.10882-0.45676 0.77282 0.84644-0.62521
  -2  -5   378053.72 1919.24   1-0.87846 0.71393 0.38122-0.69701 0.28803-0.06692
   2   5  -363639.81 1562.56   1-0.28916 0.45396 0.79869-0.48262 0.52770-0.74898
  -2   5   372055.10 1970.59   1 0.81504-0.98001 0.50487-0.18866 0.28425-0.06297
  -2   5   370274.58 1743.96   1 0.80943-0.97434 0.39978-0.08393 0.43009-0.20884
   2   5  -372046.10 1869.14   1 0.83472-0.66982 0.20169 0.11420 0.51240-0.73368
   2  -5  -378205.82 1901.39   1 0.72338-0.55842-0.32696 0.01092 0.60812-0.82948
   2   5  -213300.53  489.96   1 0.96148-0.79090-0.27454 0.59054 0.01287-0.16036
   2  -5  -215139.40  489.09   1 0.12855 0.04220-0.55307 0.23703 0.82315-0.97058
  -2   5   215175.80  493.60   1-0.45244 0.28176-0.38186 0.69792 0.80589-0.65841
  -2  -5   214775.33  546.04   1-0.88498 0.71457 0.37076-0.68655 0.28167-0.13426
   2   5  -213398.47  452.16   1-0.47989 0.65036 0.72663-0.41061 0.49163-0.63907
  -2   5   215751.12  664.72   1 0.79465-0.96540 0.52780-0.21159 0.29991-0.15238
  -2   5   214664.04  531.90   1 0.78574-0.95651 0.48280-0.16695 0.38667-0.23916
   2   5  -214674.46  557.93   1 0.82866-0.65792 0.05104 0.26489 0.55740-0.70495
   2  -5  -213706.24  473.16   1 0.80825-0.63751-0.07453-0.24139 0.58409-0.73164
   2   5  -1157560.6 3841.67   1 0.95156-0.77508-0.30154 0.61754 0.05996-0.13371
  -2  -5   1147573.0 3501.14   1 0.71621-0.89271-0.50296 0.18692 0.48380-0.41003
   2  -5  -1159694.4 3795.65   1-0.14654 0.32308-0.49730 0.18124 0.85510-0.92885
  -2   5   1157595.2 3734.99   1-0.60788 0.43143-0.29554 0.61148 0.73697-0.66328
  -2  -5   1155463.9 3749.45   1-0.89827 0.72199 0.34827-0.66406 0.26795-0.19425
  -2   5   1167378.6 3997.51   1 0.75576-0.93241 0.55896-0.24311 0.34113-0.26737
   2  -5  -1135760.4 3237.92   1 0.83416-0.65750 0.12503-0.44097 0.53715-0.61093
   2   5   0122296.9 2916.85   1 0.93724-0.75485-0.33029 0.64629 0.11175-0.11175
  -2  -5   0131942.1 3116.80   1 0.57648-0.75886-0.54325 0.22713 0.61035-0.61035
   2  -5   0134496.8 3227.92   1-0.36502 0.54740-0.42129 0.10522 0.83022-0.83022
  -2  -5   0134340.3 3296.30   1-0.91501 0.73287 0.31736-0.63315 0.24903-0.24903
  -2   5   0125463.8 3072.20   1 0.70117-0.88354 0.61507-0.29884 0.36061-0.36061
  -2   5   0125520.0 3049.52   1 0.72121-0.90362 0.62701-0.31107 0.29443-0.29443
   2   5   111115.90  370.11   1 0.91543-0.72715-0.36319 0.67920 0.17340-0.09966
  -2  -5  -113635.72  394.04   1 0.26884-0.45711-0.56483 0.24869 0.78018-0.85392
   2  -5   112209.21  519.71   1-0.51749 0.70573-0.34855 0.03249 0.78147-0.70773
  -2  -5  -113612.83  649.82   1-0.93291 0.74494 0.28030-0.59600 0.22604-0.29973
  -2   5  -114291.31  549.03   1 0.60960-0.79777 0.68034-0.36411 0.40684-0.48059
   2  -5   113225.42  496.57   1 0.91195-0.72388 0.36394-0.68015 0.18943-0.11567
  -2   5  -111907.42  524.17   1 0.68267-0.87090 0.68729-0.37134 0.24816-0.32190
   2   5   112482.61  543.08   1 0.71477-0.52631-0.34537 0.66141 0.60812-0.53434
   2   5   262582.90 1486.55   1 0.87400-0.67993-0.40805 0.72398 0.26383-0.11634
  -2  -5  -272267.20 1701.55   1-0.34521 0.15113-0.42945 0.11338 0.83450-0.98198
   2  -5   275416.55 1958.26   1-0.61699 0.81109-0.28971-0.02622 0.73169-0.58432
  -2  -5  -272099.71 1913.16   1-0.95032 0.75644 0.23838-0.55408 0.20014-0.34752
  -2   5  -265003.21 1636.54   1 0.46749-0.66160 0.75415-0.43787 0.46118-0.60872
   2  -5   266477.85 1664.08   1 0.89469-0.70085 0.39437-0.71059 0.20973-0.06221
  -2   5  -264098.49 1697.22   1 0.64120-0.83525 0.74023-0.42429 0.20225-0.34974
   2   5   266108.60 1753.41   1 0.66461-0.47057-0.43854 0.75449 0.60495-0.45748
   2   5   3166393.4 4856.96   1 0.91956-0.71939-0.00842 0.32445-0.39284 0.61417
   2   5   3168603.1 4922.59   1 0.75122-0.55122-0.48790 0.80394 0.44452-0.22320
   2  -5   3177742.2 5358.26   1-0.68031 0.88030-0.24621-0.06972 0.69032-0.46925
  -2  -5  -3184805.0 5574.31   1-0.96612 0.76635 0.19264-0.50834 0.17172-0.39279
  -2   5  -3179280.7 5299.92   1 0.25480-0.45484 0.81929-0.50302 0.51363-0.73490
   2  -5   3165216.0 4890.70   1 0.88218-0.68256 0.41460-0.73082 0.22327-0.00199
  -2   5  -3178879.1 5390.56   1 0.59753-0.79743 0.78643-0.47058 0.15644-0.37767
   2   5   3183561.0 5523.39   1 0.61892-0.41907-0.51068 0.82663 0.59676-0.37556
   2   5   414874.23  493.74   1 0.96252-0.75653-0.27111 0.58712 0.00700 0.28798
   2   5   416047.00  503.93   1 0.36884-0.16306-0.56564 0.88177 0.73756-0.44258
   2  -5   417566.96  785.27   1-0.71977 0.92564-0.21607-0.09986 0.65972-0.36496
  -2  -5  -418272.34 1527.40   1-0.97947 0.77380 0.14381-0.45951 0.14121-0.43597
  -2   5  -415416.40  546.20   1-0.04410-0.16182 0.83954-0.52341 0.54150-0.83657
   2  -5   415837.06  576.80   1 0.87870-0.67331 0.41999-0.73620 0.22688 0.06815
  -2   5  -415920.43  788.69   1 0.55177-0.75750 0.82646-0.51062 0.11178-0.40674
   2   5   416333.20  815.00   1 0.58058-0.37491-0.56375 0.87969 0.58745-0.29252
   2   5   516906.04  688.14   1 0.92409-0.71221-0.35121 0.66722 0.15064 0.21809
   2   5   518125.17  632.66   1-0.03413 0.24544-0.52521 0.84125 0.85028-0.48170
   2  -5   519933.46  888.34   1-0.74346 0.95522-0.19664-0.11929 0.63921-0.27077
  -2  -5  -525275.67 2178.11   1-0.98974 0.77817 0.09242-0.40812 0.10892-0.47737
  -2   5  -518661.12  668.61   1-0.41829 0.20648 0.75410-0.43808 0.50631-0.87489
   2  -5   519156.77  689.76   1 0.89079-0.67963 0.40082-0.71704 0.21404 0.15475
  -2   5  -519291.79  863.43   1 0.50429-0.71585 0.86086-0.54502 0.06775-0.43646
   2   5   518014.50  846.67   1 0.55090-0.33925-0.60097 0.91687 0.57908-0.21035
  -2   5  -6  -58.71   37.73   1-0.79822 0.58057 0.48766-0.17172 0.35357-0.79589
   2   5   7 1026.28  182.95   1-0.39210 0.61543-0.40968 0.72574 0.82365-0.30746
   2  -5   7 4788.96  911.11   1-0.76166 0.98515-0.18113-0.13484 0.62214-0.10627
  -2  -5  -7 3223.17  633.35   1-0.99890 0.77513-0.02038-0.29564 0.04217-0.55835
  -2   5  -7 1708.99  329.71   1 0.40516-0.62841 0.91404-0.59824-0.01900-0.49719
   2   5   7  987.19  397.53   1 0.51894-0.29561-0.63795 0.95385 0.56895-0.05273
   2  -5   8 2294.13  504.81   1-0.76101 0.99038-0.18170-0.13427 0.62276-0.03321
  -2  -5  -8 2819.02  514.63   1-0.99694 0.76725-0.07791-0.23812 0.00558-0.59549
  -2   5  -8 2922.52  558.61   1 0.35308-0.58216 0.93357-0.61777-0.06133-0.52861
   2   5   8 2643.70  514.23   1 0.51522-0.28604-0.64205 0.95795 0.56771 0.02225
   2  -5   932682.47 2486.41   1-0.75562 0.99092-0.18621-0.12972 0.62797 0.03522
  -2   5  -930156.59 3352.59   1 0.29945-0.53437 0.94851-0.63270-0.10322-0.56047
   2   5   934441.17 2524.11   1 0.51858-0.28356-0.63835 0.95424 0.56883 0.09487
   2  -5  1024291.17 2475.45   1-0.74630 0.98748-0.19423-0.12170 0.63663 0.10025
  -2   5 -1018489.05 3690.47   1 0.24473-0.48566 0.95866-0.64275-0.14512-0.59245
   2   5  1026048.51 2611.13   1 0.52822-0.28735-0.62752 0.94342 0.57200 0.16545
   2  -5  1110152.32 1454.91   1-0.73339 0.98046-0.20503-0.11090 0.64814 0.16243
  -2   5 -11 7434.47 1341.86   1 0.18778-0.43455 0.96437-0.64846-0.18630-0.62502
   2   6 -11 9124.90 1289.05   1 0.92560-0.80815-0.01941 0.39863-0.37799-0.43356
  -2   6  11 5500.28  865.19   1 0.73866-0.85720 0.58303-0.20356 0.33829 0.47303
   2   6 -10 -179.25  399.75   1 0.93830-0.81494-0.04495 0.42418-0.34288-0.39489
  -2   6  10 1272.13  598.23   1 0.76685-0.89119 0.55642-0.17694 0.31989 0.41768
   2   6 -10  821.06  350.88   1 0.48824-0.36409 0.87107-0.49205 0.05334-0.79076
   2   6  -925889.13 1954.43   1 0.94882-0.81955-0.06976 0.44898-0.30799-0.35600
  -2   6   930796.53 2344.74   1 0.79004-0.92018 0.53263-0.15316 0.30354 0.36027
   2   6  -930817.88 2227.43   1 0.56437-0.43439 0.81617-0.43716 0.12383-0.78751
   2   6  -824736.87 1955.03   1 0.95730-0.82212-0.09379 0.47302-0.27343-0.31678
   2  -6  -818970.24 1088.05   1 0.97130-0.83613-0.22956-0.14966-0.06221-0.52771
  -2   6   820994.89 1465.92   1 0.80831-0.94442 0.51263-0.13317 0.28954 0.30054
   2   6  -821291.18 1242.85   1 0.63394-0.49813 0.74850-0.36937 0.19454-0.78449
   2   6  -742470.24 4045.81   1 0.96403-0.82294-0.11658 0.49582-0.23883-0.27735
   2  -6  -740494.25 2357.51   1 0.94970-0.80862-0.30578-0.07341 0.06750-0.58372
  -2   6   743810.05 2624.08   1 0.82234-0.96423 0.49623-0.11678 0.27837 0.23794
   2   6  -741350.23 2320.57   1 0.69651-0.55487 0.66709-0.28796 0.26431-0.78050
  -2   6   739867.35 2163.65   1 0.83516-0.97645 0.16353 0.21554 0.52513-0.00881
   2   6  -620276.75 2478.69   1 0.96877-0.82175-0.13893 0.51816-0.20534-0.23709
   2  -6  -6 9661.76 1003.29   1 0.89524-0.74818-0.38693 0.00781 0.22096-0.66344
   2   6  -614896.03 1472.37   1 0.74207-0.59452 0.57993-0.20046 0.33614-0.77868
  -2   6   616244.36 1753.41   1 0.83179-0.97945 0.48468-0.10523 0.27053 0.17202
   2   6  -618013.22 1866.37   1 0.74927-0.60199 0.57298-0.19395 0.33207-0.77458
  -2   6   617060.58 1725.59   1 0.83468-0.98188 0.20277 0.17629 0.51203-0.06947
   2   6  -534666.53 1347.76   1 0.97183-0.81888-0.16023 0.53947-0.17278-0.19592
   2  -6  -529491.41 1040.73   1 0.78846-0.63547-0.46892 0.08967 0.39803-0.76689
  -2   6   530998.22 1081.72   1-0.15632 0.00318-0.49452 0.87380 0.85498-0.48627
   2   6  -534286.53 1156.01   1 0.19462-0.04146 0.82968-0.45015 0.52321-0.89198
  -2   6   538943.93 1575.17   1 0.83634-0.98977 0.47897-0.09951 0.26665 0.10214
   2   6  -534793.53 1342.96   1 0.79139-0.63823 0.46552-0.08650 0.39620-0.76496
  -2   6   532679.00 1152.57   1 0.83165-0.98475 0.25668 0.12238 0.49239-0.12359
   2  -6  -527324.23  975.82   1 0.40559-0.25241-0.74754 0.36846 0.52598-0.89471
   2   6  -421132.13 1882.82   1 0.97337-0.81449-0.18027 0.55951-0.14156-0.15339
   2  -6  -413720.88  560.55   1 0.61000-0.45078-0.53579 0.15644 0.58379-0.87881
  -2   6   417773.70  677.55   1-0.30544 0.14645-0.44506 0.82434 0.84179-0.54682
  -2  -6   412577.79  682.08   1-0.96224 0.80377 0.20478-0.58362 0.17928 0.11547
   2   6  -416899.36  639.12   1-0.16435 0.32329 0.82600-0.44672 0.53917-0.83421
  -2   6   417513.97  878.42   1 0.83532-0.99452 0.48027-0.10081 0.26754 0.02750
  -2   6   418444.02  731.49   1 0.82440-0.98340 0.32025 0.05882 0.46668-0.17164
   2   6  -418166.87  839.11   1 0.81997-0.66098 0.34767 0.03139 0.45470-0.74974
   2  -6  -412410.83  524.41   1 0.59203-0.43293-0.54851 0.16937 0.59043-0.88537
   2   6  -375241.73 2462.53   1 0.97359-0.80879-0.19868 0.57792-0.11236-0.10885
   2  -6  -369402.08 2117.57   1 0.36039-0.19547-0.56583 0.18647 0.74158-0.96281
  -2   6   368798.64 2094.77   1-0.45951 0.29468-0.37841 0.75769 0.80351-0.58229
  -2  -6   365486.90 2024.16   1-0.94977 0.78539 0.23982-0.61867 0.20103 0.02002
   2   6  -362432.16 1908.56   1-0.40076 0.56533 0.76112-0.38190 0.50997-0.73112
  -2   6   373009.59 2394.05   1 0.82748-0.99246 0.49001-0.11055 0.27414-0.05286
  -2   6   369761.00 2156.20   1 0.81187-0.97677 0.38910-0.01008 0.43526-0.21400
   2   6  -373918.93 2338.95   1 0.83392-0.66902 0.22213 0.15693 0.50520-0.72648
   2  -6  -363437.12 1956.35   1 0.72138-0.55643-0.33129-0.04796 0.60814-0.82950
   2   6  -2106299.9 3248.37   1 0.97282-0.80209-0.21481 0.59405-0.08636-0.06112
   2  -6  -2113676.7 3407.70   1 0.07777 0.09298-0.54598 0.16673 0.83417-0.98160
  -2   6   298538.82 2955.16   1-0.59878 0.42822-0.30127 0.68040 0.74208-0.59470
  -2  -6   2102231.9 3232.13   1-0.94604 0.77576 0.24936-0.62820 0.20693-0.05956
  -2   6   2105356.9 3280.27   1 0.81076-0.98151 0.50983-0.13037 0.28763-0.14011
  -2   6   2107955.6 3277.05   1 0.79355-0.96433 0.45858-0.07956 0.39996-0.25245
   2   6  -2110740.1 3413.21   1 0.83247-0.66173 0.09429 0.28482 0.54598-0.69353
   2   6  -133195.73  959.46   1 0.97157-0.79491-0.22742 0.60666-0.06574-0.00799
  -2  -6   133592.75  897.94   1 0.73977-0.91627-0.49310 0.11385 0.45779-0.38402
   2  -6  -138808.10 1071.50   1-0.17972 0.35626-0.48765 0.10838 0.85433-0.92807
  -2   6   129608.20  813.97   1-0.71124 0.53480-0.22281 0.60194 0.66669-0.59300
  -2  -6   138561.99 1111.65   1-0.94853 0.77235 0.24304-0.62188 0.20302-0.12933
  -2   6   135771.85 1135.77   1 0.78161-0.95818 0.54148-0.16201 0.30961-0.23585
  -2   6   135521.88 1055.73   1 0.76969-0.94634 0.52625-0.14723 0.36141-0.28766
   2   6  -134925.45 1103.56   1 0.81695-0.64029-0.03072 0.40984 0.57587-0.64965
   2   6   015151.33  491.54   1 0.97071-0.78813-0.23378 0.61301-0.05525 0.05525
  -2  -6   012712.27  419.96   1 0.62296-0.80533-0.53304 0.15380 0.57252-0.57252
   2  -6   012569.07  513.16   1-0.37859 0.56097-0.41554 0.03626 0.82703-0.82703
  -2  -6   015352.50 1654.39   1-0.95499 0.77291 0.22580-0.60464 0.19234-0.19234
  -2   6   014971.28  600.85   1 0.73466-0.91703 0.58663-0.20715 0.34078-0.34078
  -2   6   016285.04  655.97   1 0.74114-0.92355 0.59002-0.21089 0.32026-0.32026
   2   6   014325.69  682.69   1 0.78977-0.60719-0.14663 0.52589 0.59561-0.59561
   2   6   1155947.5 3672.91   1 0.97172-0.78320-0.22620 0.60544-0.06774 0.14149
  -2  -6  -1148084.4 3468.61   1 0.35863-0.54690-0.56586 0.18650 0.74241-0.81615
   2  -6   1144863.4 3514.77   1-0.51763 0.70586-0.34848-0.03079 0.78142-0.70767
  -2  -6  -1146121.7 3639.30   1-0.96362 0.77565 0.20055-0.57939 0.17665-0.25033
  -2   6  -1160612.9 3868.87   1 0.66111-0.84928 0.64567-0.26619 0.38214-0.45590
  -2   6  -1163430.5 3988.65   1 0.70803-0.89627 0.64909-0.26995 0.27814-0.35188
   2   6   1162125.7 3944.95   1 0.75570-0.56724-0.24968 0.62894 0.60544-0.53165
   2   6   249046.73 1475.18   1 0.97258-0.77815-0.16798 0.54722-0.16077 0.30825
  -2  -6  -243545.31 1294.98   1-0.27521 0.08113-0.45621 0.07693 0.84624-0.99372
   2  -6   244970.36 1538.66   1-0.61000 0.80411-0.29419-0.08493 0.73575-0.58837
  -2  -6  -242691.97 1493.03   1-0.97299 0.77912 0.16913-0.54798 0.15706-0.30444
  -2   6  -251812.14 1659.89   1 0.54719-0.74129 0.71626-0.33672 0.43306-0.58059
  -2   6  -249895.65 1669.33   1 0.67123-0.86528 0.70295-0.32382 0.23515-0.38264
   2   6   248569.51 1626.75   1 0.71880-0.52447-0.33683 0.71609 0.60815-0.46058
   2  -6   3   53.68  351.06   1-0.67018 0.87017-0.25355-0.12557 0.69754-0.47647
  -2  -6  -3 2069.55  321.38   1-0.98199 0.78221 0.13284-0.51168 0.13434-0.35540
  -2   6  -3 1493.21  206.14   1 0.37380-0.57384 0.78862-0.40909 0.48819-0.70946
  -2   6  -3  767.30  302.05   1 0.63127-0.83115 0.75148-0.37235 0.19173-0.41295
   2   6   3 1041.05  524.03   1 0.68242-0.48256-0.40713 0.78627 0.60707-0.38587
   2  -6   455391.51 2024.66   1-0.70861 0.91448-0.22486-0.15425 0.66880-0.37404
  -2  -6  -455635.92 2053.35   1-0.98971 0.78404 0.09257-0.47141 0.10902-0.40378
  -2   6  -456293.51 1905.82   1 0.11679-0.32272 0.83814-0.45879 0.53279-0.82786
  -2   6  -457354.39 2088.88   1 0.58878-0.79451 0.79467-0.41566 0.14771-0.44268
   2   6   454113.71 2016.65   1 0.65062-0.44494-0.46182 0.84096 0.60283-0.30790
  -2  -6  -5120463.3 4423.61   1-0.99537 0.78345 0.04626-0.42551 0.08423-0.45292
  -2   6  -599742.48 3529.17   1-0.24354 0.03181 0.81033-0.43105 0.53296-0.90176
   2   6   5103454.0 3841.37   1 0.62470-0.41320-0.50215 0.88129 0.59799-0.22932
   2  -6   634405.29 1944.23   1-0.74566 0.96330-0.19478-0.18434 0.63722-0.19508
  -2  -6  -637194.59 2019.32   1-0.99850 0.78065-0.00056-0.37868 0.05472-0.49716
  -2   6  -622498.69 1118.16   1-0.71117 0.49352 0.57450-0.19537 0.40518-0.84750
  -2   6  -638954.94 2104.28   1 0.49656-0.71394 0.86586-0.48685 0.06078-0.50323
   2   6   637276.53 2050.56   1 0.60552-0.38820-0.52992 0.90906 0.59373-0.15133
   2  -6   710236.25 1041.74   1-0.75150 0.97503-0.18978-0.18934 0.63184-0.11602
  -2  -6  -712222.28  953.27   1-0.99848 0.77471-0.04977-0.32946 0.02351-0.53969
  -2   6  -714084.15 1911.03   1 0.44791-0.67115 0.89391-0.51495 0.01706-0.53326
   2   6   714121.27 1088.55   1 0.59328-0.37014-0.54683 0.92597 0.59075-0.07461
   2  -6   813746.43 1077.71   1-0.75157 0.98098-0.18972-0.18940 0.63177-0.04226
  -2  -6  -814527.51  948.25   1-0.99483 0.76514-0.10108-0.27816-0.00924-0.58067
  -2   6  -819463.96 2231.40   1 0.39685-0.62593 0.91751-0.53855-0.02588-0.56406
   2   6   820413.61 1221.38   1 0.58775-0.35879-0.55427 0.93341 0.58934 0.00052
   2  -6   9 1602.16  697.83   1-0.74697 0.98227-0.19366-0.18546 0.63601 0.02717
  -2   6  -9 2806.58  828.91   1 0.34391-0.57883 0.93649-0.55752-0.06861-0.59507
   2   6   9 3364.25  817.00   1 0.58850-0.35372-0.55327 0.93241 0.58953 0.07406
   2  -6  10 1009.11  502.38   1-0.73838 0.97957-0.20089-0.17822 0.64375 0.09312
  -2   6 -10 1305.32  455.39   1 0.28907-0.52983 0.95083-0.57186-0.11113-0.62629
   2   6  10 2959.57  724.87   1 0.59503-0.35443-0.54444 0.92358 0.59119 0.14614
   2   7 -1012033.17 1687.75   1 0.92820-0.80484-0.02435 0.46678-0.37126-0.36651
  -2   7  1012205.53 1570.14   1 0.77539-0.89973 0.54787-0.10515 0.31400 0.42357
   2   7 -1011353.44 1445.86   1 0.52301-0.39886 0.84808-0.40590 0.08485-0.82228
   2   7  -9 5924.48 1371.49   1 0.93914-0.80987-0.04679 0.48922-0.34032-0.32367
  -2   7   9 7378.90 1656.32   1 0.79677-0.92711 0.52549-0.08279 0.29833 0.36551
   2   7  -9 6710.70 1479.52   1 0.59243-0.46245 0.79127-0.34909 0.15134-0.81502
   2   7  -810256.30 1723.79   1 0.94818-0.81300-0.06812 0.51055-0.31032-0.27990
  -2   7   810265.93 1341.87   1 0.81410-0.95022 0.50596-0.06326 0.28500 0.30508
   2   7  -724792.84 2687.58   1 0.95548-0.81439-0.08820 0.53063-0.28154-0.23490
   2  -7  -728683.12 1523.05   1 0.95496-0.81388-0.29323-0.14917 0.04532-0.56155
  -2   7   723031.55 1491.21   1 0.82723-0.96911 0.49032-0.04762 0.27435 0.24196
   2   7  -726315.16 1570.05   1 0.71030-0.56866 0.64541-0.20309 0.28090-0.79710
  -2   7   723539.84 1285.73   1 0.83395-0.97524 0.22141 0.22084 0.50546 0.01085
   2   7  -637402.39 2401.54   1 0.96118-0.81418-0.10681 0.54923-0.25440-0.18825
   2  -7  -651923.23 2798.84   1 0.89764-0.75058-0.38430-0.05798 0.21574-0.65822
  -2   7   639815.22 2369.06   1 0.83610-0.98376 0.47927-0.03658 0.26686 0.17569
   2   7  -635235.57 2013.68   1 0.75645-0.60917 0.55743-0.11524 0.34211-0.78461
  -2   7   639695.93 2171.94   1 0.83233-0.97952 0.24806 0.19418 0.49566-0.05310
   2   7  -553989.48 2160.70   1 0.96561-0.81266-0.12326 0.56570-0.22889-0.13981
   2  -7  -545027.03 1652.01   1 0.77912-0.62613-0.47401 0.03156 0.41021-0.77907
  -2   7   544541.36 1632.68   1-0.37289 0.21975-0.41797 0.86046 0.82840-0.45969
  -2  -7   545240.83 1658.79   1-0.99891 0.84623-0.02241-0.42003 0.04089 0.32780
   2   7  -546322.49 1677.28   1 0.02701 0.12608 0.84162-0.39904 0.53938-0.90821
  -2   7   549102.65 2041.76   1 0.84048-0.99391 0.47368-0.03099 0.26307 0.10572
   2   7  -553232.45 2080.91   1 0.79321-0.64005 0.45968-0.01749 0.39937-0.76812
  -2   7   547147.91 1771.87   1 0.82861-0.98171 0.28783 0.15441 0.48015-0.11135
   2   7  -4124358.2 4155.34   1 0.96857-0.80969-0.13778 0.58023-0.20707-0.08788
   2  -7  -4116001.9 3754.16   1 0.58322-0.42399-0.54185 0.09928 0.60518-0.90020
  -2   7   4118699.5 3841.40   1-0.50102 0.34203-0.35733 0.79982 0.78821-0.49324
  -2  -7   4110396.5 3724.88   1-0.99175 0.83315 0.07619-0.51864 0.10299 0.19196
   2   7  -4101524.8 3295.05   1-0.27968 0.43862 0.80127-0.35878 0.52890-0.82394
  -2   7   4102864.2 3540.59   1 0.83979-0.99899 0.47457-0.03187 0.26367 0.03136
   2   7  -4121795.5 4073.86   1 0.81866-0.65967 0.35495 0.08729 0.45142-0.74646
  -2   7   4118158.4 3874.57   1 0.82178-0.98077 0.33709 0.10516 0.45939-0.16435
   2   7  -371321.89 2630.01   1 0.97042-0.80562-0.14914 0.59159-0.18980-0.03141
   2  -7  -369661.73 2352.20   1 0.32294-0.15801-0.56609 0.12351 0.75844-0.97968
  -2   7   368315.00 2306.37   1-0.61887 0.45419-0.28849 0.73081 0.73058-0.50952
  -2  -7   366366.00 2276.02   1-0.98402 0.81965 0.12332-0.56531 0.12837 0.09269
  -2   7   371853.89 2465.85   1 0.81105-0.97596 0.39275 0.04944 0.43351-0.21225
   2   7  -376867.21 2714.86   1 0.83253-0.66763 0.24532 0.19692 0.49669-0.71797
   2   7  -276896.93 2820.01   1 0.97133-0.80060-0.15589 0.59834-0.17946 0.03198
   2  -7  -280844.85 2711.32   1 0.04607 0.12468-0.54081 0.09835 0.83987-0.98730
  -2   7   271027.72 2400.71   1-0.71679 0.54623-0.21844 0.66076 0.66217-0.51480
  -2  -7   277249.85 2652.68   1-0.97886 0.80858 0.14637-0.58835 0.14282 0.00455
  -2   7   280489.25 2846.66   1 0.81853-0.98928 0.50077-0.05807 0.28146-0.13394
  -2   7   280231.10 2747.49   1 0.79576-0.96653 0.45128-0.00909 0.40386-0.25636
   2   7  -279327.47 2770.53   1 0.83460-0.66379 0.13456 0.30768 0.53416-0.68168
   2   7  -144181.64 1439.59   1 0.97125-0.79459-0.15524 0.59768-0.18047 0.10673
  -2  -7   156246.86 1852.53   1-0.97754 0.80136 0.15178-0.59376 0.14620-0.07251
  -2   7   144413.13 1545.68   1 0.79354-0.97006 0.52900-0.08630 0.30073-0.22697
  -2   7   143392.35 1465.17   1 0.77578-0.95243 0.51061-0.06842 0.37072-0.29697
   2   7  -139115.03 1381.12   1 0.82580-0.64913 0.02671 0.41559 0.56332-0.63710
   2   7   030576.74 1031.56   1 0.96914-0.78656-0.14104 0.58348-0.20214 0.20214
  -2  -7   035243.89 1118.15   1 0.64840-0.83078-0.52607 0.08362 0.55028-0.55028
   2  -7   035248.83 1185.61   1-0.37938 0.56176-0.41520-0.02728 0.82684-0.82684
  -2  -7   036567.60 1832.67   1-0.97921 0.79714 0.14489-0.58687 0.14189-0.14189
  -2   7   030593.53 1189.96   1 0.75350-0.93587 0.56931-0.12659 0.32879-0.32879
  -2   7   029950.46 1124.72   1 0.75122-0.93374 0.56884-0.12665 0.33477-0.33477
   2   7   028923.48 1074.55   1 0.80820-0.62562-0.07478 0.51709 0.58413-0.58413
   2   7   112964.23  516.47   1 0.95766-0.76930-0.09493 0.53735-0.27178 0.34556
  -2  -7  -115608.17  577.59   1 0.41756-0.60572-0.56372 0.12115 0.71263-0.78639
   2  -7   115511.27  748.05   1-0.50898 0.69721-0.35312-0.08936 0.78500-0.71126
  -2  -7  -116211.62 1359.44   1-0.98284 0.79487 0.12891-0.57089 0.13187-0.20556
  -2   7  -113677.46  675.98   1 0.69185-0.88002 0.62250-0.17978 0.36582-0.43958
  -2   7  -113159.34  719.98   1 0.72274-0.91098 0.62433-0.18201 0.29636-0.37011
   2   7   112818.76  686.85   1 0.78407-0.59561-0.16616 0.60863 0.59800-0.52421
  -2  -7  -230432.33 1007.40   1-0.22575 0.03167-0.47319 0.03071 0.85153-0.99902
   2  -7   233676.91 1358.51   1-0.59674 0.79085-0.30254-0.13977 0.74320-0.59583
  -2  -7  -232244.98 1290.10   1-0.98742 0.79354 0.10589-0.54787 0.11741-0.26478
  -2   7  -236437.58 1369.67   1 0.59738-0.79148 0.68779-0.24500 0.41239-0.55993
  -2   7  -237642.39 1445.07   1 0.69007-0.88412 0.67667-0.23435 0.25673-0.40422
   2   7   237595.07 1469.70   1 0.75714-0.56280-0.24587 0.68834 0.60520-0.45763
   2  -7   362244.61 2204.02   1-0.65520 0.85519-0.26411-0.17819 0.70777-0.48670
  -2  -7  -363855.84 2284.86   1-0.99186 0.79179 0.07547-0.51792 0.10253-0.32375
  -2   7  -360619.87 2044.54   1 0.45442-0.65436 0.75959-0.31679 0.46530-0.68661
  -2   7  -360911.33 2176.81   1 0.65387-0.85375 0.72512-0.28280 0.21594-0.43716
   2   7   365226.77 2319.97   1 0.72989-0.52967-0.31251 0.75497 0.60794-0.38658
   2  -7   447808.25 2026.05   1-0.69343 0.89930-0.23648-0.20583 0.68060-0.38585
  -2  -7  -446487.66 2107.65   1-0.99579 0.78980 0.04182-0.48428 0.08144-0.37640
  -2   7  -449807.25 1830.00   1 0.23829-0.44419 0.82247-0.37969 0.51647-0.81149
  -2   7  -450721.23 2049.32   1 0.61471-0.82045 0.76933-0.32715 0.17389-0.46885
   2   7   448125.60 1990.65   1 0.70468-0.49859-0.36600 0.80847 0.60783-0.31268
   2  -7   514978.04 1698.01   1-0.71759 0.92935-0.21781-0.22450 0.66152-0.29308
  -2   7  -515359.59 1543.62   1-0.08456-0.12723 0.83644-0.39386 0.54148-0.91031
   2   7   517001.80 1853.33   1 0.68251-0.47102-0.40696 0.84929 0.60708-0.23841
   2  -7   612872.11 1198.06   1-0.73172 0.94937-0.20640-0.23590 0.64959-0.20746
  -2  -7  -615173.13 1397.31   1-0.99882 0.78098-0.03634-0.40610 0.03205-0.47449
  -2   7  -612410.25 1161.50   1 0.52778-0.74516 0.84467-0.40249 0.08926-0.53171
   2   7   613200.24 1262.72   1 0.66578-0.44847-0.43653 0.87886 0.60511-0.16271
   2  -7   715976.65 1134.06   1-0.73841 0.96194-0.20087-0.24144 0.64372-0.12790
  -2  -7  -715275.15 1008.79   1-0.99679 0.77302-0.07984-0.36260 0.00434-0.52052
  -2   7  -723201.26 1444.00   1 0.48061-0.70382 0.87569-0.43351 0.04655-0.56275
   2   7   720030.04 1245.53   1 0.65438-0.43125-0.45566 0.89799 0.60344-0.08730
   2  -7   8 4013.19  826.98   1-0.73933 0.96875-0.20010-0.24221 0.64291-0.05340
  -2   7  -8 5738.08 1209.22   1 0.43170-0.66078 0.90200-0.45988 0.00323-0.59318
   2   7   8 5709.57 1165.73   1 0.64844-0.41948-0.46534 0.90767 0.60247-0.01260
   2  -7   925302.63 2552.52   1-0.73555 0.97085-0.20325-0.23906 0.64625 0.01694
  -2   7  -914636.55 2373.03   1 0.38007-0.61499 0.92410-0.48198-0.03961-0.62408
   2  -7  1014385.73 1479.00   1-0.72775 0.96893-0.20965-0.23266 0.65301 0.08387
  -2   7 -10 6596.73 1611.21   1 0.32625-0.56700 0.94167-0.49955-0.08249-0.65494
   2   7  1012154.96 1213.38   1 0.65233-0.41173-0.45903 0.90136 0.60311 0.13422
   2   8 -1010335.89 1347.91   1 0.91610-0.79274-0.00239 0.50802-0.40093-0.33684
  -2   8  10 7687.34 1081.10   1 0.77940-0.90374 0.54377-0.03780 0.31118 0.42638
   2   8 -10 7903.45 1038.05   1 0.54812-0.42397 0.82935-0.32400 0.10831-0.84573
   2   8  -929746.44 4776.04   1 0.92725-0.79798-0.02253 0.52817-0.37374-0.29025
  -2   8   931230.82 5001.99   1 0.79951-0.92984 0.52249-0.01655 0.29627 0.36756
   2   8  -927643.51 2716.02   1 0.61182-0.48184 0.77230-0.26695 0.17092-0.83460
   2   8  -838188.66 2714.71   1 0.93657-0.80140-0.04126 0.54689-0.34801-0.24220
  -2   8   835827.67 2598.81   1 0.81578-0.95189 0.50401 0.00192 0.28366 0.30641
   2   8  -836824.01 2614.33   1 0.66853-0.53272 0.70652-0.20101 0.23213-0.82207
   2   8  -7 1050.27  324.39   1 0.94419-0.80310-0.05832 0.56396-0.32418-0.19226
  -2   8   7 1566.18  520.81   1 0.82808-0.96996 0.48928 0.01665 0.27365 0.24267
   2   8  -7   43.41  294.46   1 0.71838-0.57674 0.63190-0.12640 0.29088-0.80708
   2   8  -625062.50 2308.71   1 0.95021-0.80322-0.07339 0.57903-0.30281-0.13984
  -2   8   622426.05 1608.83   1 0.83637-0.98403 0.47893 0.02700 0.26663 0.17592
   2   8  -624755.80 1659.71   1 0.75971-0.61242 0.55009-0.04472 0.34675-0.78925
  -2   8   622378.08 1441.35   1 0.82845-0.97564 0.28924 0.21618 0.47958-0.03702
   2   8  -580707.14 4456.51   1 0.95473-0.80182-0.08597 0.59160-0.28477-0.08411
   2  -8  -578818.14 4205.49   1 0.77913-0.62613-0.47400-0.03165 0.41020-0.77906
  -2   8   577806.28 4330.57   1 0.84044-0.99387 0.47373 0.03220 0.26311 0.10569
   2   8  -579348.12 4335.61   1 0.79279-0.63963 0.46104 0.04431 0.39863-0.76739
  -2   8   573028.35 3950.79   1 0.82452-0.97762 0.31941 0.18601 0.46704-0.09824
   2   8  -423558.78 1395.87   1 0.95777-0.79895-0.09528 0.60091-0.27127-0.02383
   2  -8  -428002.62 1431.11   1 0.56800-0.40877-0.54494 0.03914 0.61676-0.91179
  -2  -8   426615.63 1509.95   1-0.99890 0.84030-0.02900-0.47665 0.03671 0.25824
  -2   8   424581.11 1489.05   1 0.83981-0.99901 0.47455 0.03138 0.26366 0.03137
  -2   8   424063.17 1296.84   1 0.81798-0.97698 0.35861 0.14681 0.44976-0.15472
   2   8  -423512.58 1400.92   1 0.81632-0.65732 0.36726 0.13816 0.44579-0.74083
   2   8  -3 6347.45 1042.58   1 0.95924-0.79451-0.10008 0.60572-0.26426 0.04293
   2  -8  -3 7434.56  418.16   1 0.30093-0.13601-0.56581 0.05999 0.76765-0.98888
  -2   8   3 4580.52  265.16   1-0.74709 0.58241-0.19356 0.69906 0.63591-0.41484
  -2  -8   3 7180.42  590.81   1-0.99693 0.83241 0.02828-0.53395 0.07292 0.14829
  -2   8   3 5759.35  670.04   1 0.83360-0.99858 0.48242 0.02351 0.26900-0.04771
  -2   8   3 5845.40  419.65   1 0.80832-0.97322 0.40448 0.10087 0.42779-0.20654
   2   8  -3 7376.84  655.17   1 0.83044-0.66554 0.27037 0.23505 0.48710-0.70838
   2   8  -2 8665.82  720.11   1 0.95869-0.78806-0.09827 0.60391-0.26691 0.11935
   2  -8  -2 8601.10  477.56   1 0.03117 0.13958-0.53819 0.03252 0.84224-0.98967
  -2  -8   2 9316.92 1262.03   1-0.99400 0.82355 0.05887-0.56453 0.09214 0.05533
  -2   8   2 8000.02  744.84   1 0.82041-0.99116 0.49854 0.00739 0.27994-0.13242
  -2   8   2 8101.30  483.19   1 0.79487-0.96564 0.45425 0.05110 0.40228-0.25478
   2   8  -2 8929.61  699.03   1 0.83517-0.66437 0.17322 0.33220 0.52198-0.66950
   2   8  -111683.95  733.60   1 0.95470-0.77816-0.08588 0.59151-0.28489 0.21111
   2  -8  -112231.15  596.36   1-0.19715 0.37369-0.48233-0.02336 0.85351-0.92725
  -2  -8   112427.79 1618.30   1-0.99237 0.81599 0.07178-0.57744 0.10023-0.02649
  -2   8   110591.22  768.15   1 0.79796-0.97449 0.52419-0.01825 0.29743-0.22367
  -2   8   112403.12  651.03   1 0.77743-0.95408 0.50621-0.00085 0.37329-0.29954
   2   8  -113871.53  782.80   1 0.83130-0.65463 0.07877 0.42671 0.55021-0.62398
   2   8   017757.31 1194.60   1 0.94249-0.76004-0.05435 0.55998-0.32976 0.32976
  -2  -8   014633.66  579.62   1 0.65829-0.84066-0.52313 0.01747 0.54127-0.54127
   2  -8   015597.29  692.45   1-0.37002 0.55240-0.41918-0.08651 0.82907-0.82907
  -2  -8   014401.38  905.24   1-0.99233 0.81003 0.07205-0.57772 0.10040-0.10040
  -2   8   017271.21  838.26   1 0.76250-0.94487 0.56068-0.05472 0.32283-0.32283
  -2   8   017277.81  832.15   1 0.75590-0.93843 0.55865-0.05329 0.34132-0.34132
   2   8   015852.15  873.77   1 0.82038-0.63780-0.01059 0.51609 0.57170-0.57171
  -2  -8  -1183434.3 5858.08   1 0.44825-0.63642-0.56146 0.05566 0.69557-0.76932
   2  -8   1189061.1 6154.23   1-0.49317 0.68140-0.36143-0.14425 0.79129-0.71755
  -2  -8  -1192386.8 6331.36   1-0.99353 0.80531 0.06278-0.56845 0.09459-0.16833
  -2   8  -1198034.1 6441.88   1 0.70874-0.89692 0.60887-0.10291 0.35628-0.43004
  -2   8  -1198485.8 6501.18   1 0.73071-0.91894 0.60998-0.10447 0.30654-0.38029
   2   8   1198124.4 6503.54   1 0.80424-0.61573-0.09231 0.59780 0.58709-0.51331
  -2  -8  -287817.14 2790.99   1-0.22716 0.03307-0.47273-0.03296 0.85142-0.99890
   2  -8   291858.13 3126.71   1-0.57813 0.77224-0.31392-0.19158 0.75313-0.60575
  -2  -8  -288777.42 2822.00   1-0.63569 0.44158-0.27742-0.22807 0.72036-0.86774
  -2  -8  -287947.05 3066.64   1-0.99539 0.80124 0.04604-0.55170 0.08409-0.23157
  -2   8  -295187.98 3190.69   1 0.62792-0.82190 0.66856-0.16259 0.39840-0.54592
  -2   8  -299955.42 3416.78   1 0.70140-0.89546 0.65958-0.15407 0.27013-0.41762
   2   8   297420.70 3369.76   1 0.78464-0.59030-0.16428 0.66996 0.59778-0.45021
   2  -8   3 7764.84  628.49   1-0.63592 0.83591-0.27727-0.22823 0.72022-0.49915
  -2  -8  -3 8678.29 1005.34   1-0.99729 0.79722 0.02326-0.52893 0.06976-0.29098
  -2   8  -3 8029.12  453.54   1 0.50602-0.70597 0.73688-0.23082 0.44825-0.66956
  -2   8  -310201.63  668.69   1 0.66849-0.86837 0.70657-0.20106 0.23208-0.45331
   2   8   3 9268.00  686.67   1 0.76440-0.56419-0.22604 0.73172 0.60380-0.38244
   2  -8   4 5537.48  743.25   1-0.67455 0.88043-0.25040-0.25510 0.69445-0.39970
  -2  -8  -4 4647.05  929.91   1-0.99862 0.79262-0.00447-0.50118 0.05225-0.34720
  -2   8  -4 3030.76  404.40   1 0.32210-0.52800 0.80367-0.29763 0.50035-0.79537
  -2   8  -4 2701.77  501.44   1 0.63224-0.83794 0.75041-0.24490 0.19274-0.48771
   2   8   4 2463.81  590.84   1 0.74502-0.53893-0.27687 0.78254 0.60686-0.31171
   2  -8   5 6603.81  800.61   1-0.69959 0.91135-0.23181-0.27369 0.67588-0.30744
  -2  -8  -5 5173.90  666.54   1-0.99882 0.78690-0.03639-0.46926 0.03201-0.40071
  -2   8  -5 8343.84  728.10   1 0.04063-0.25243 0.84153-0.33573 0.53866-0.90750
  -2   8  -5 8551.52  879.65   1 0.59309-0.80465 0.79065-0.28530 0.15199-0.52070
   2   8   5 8606.37  924.64   1 0.72794-0.51598-0.31688 0.82255 0.60801-0.23907
   2  -8   613138.89 1647.98   1-0.71475 0.93239-0.22006-0.28544 0.66385-0.22172
  -2  -8  -614924.81  936.31   1-0.99736 0.77952-0.07188-0.43377 0.00942-0.45186
  -2   8  -611173.95 1412.55   1 0.55086-0.76824 0.82719-0.32184 0.11091-0.55336
   2   8   613819.52 1722.80   1 0.71421-0.49637-0.34652 0.85220 0.60811-0.16539
   2  -8   741946.34 3451.07   1-0.72246 0.94599-0.21392-0.29158 0.65747-0.14165
  -2  -8  -740600.11 3342.13   1-0.99376 0.76999-0.11046-0.39519-0.01525-0.50092
  -2   8  -740378.78 3295.46   1 0.50592-0.72913 0.85979-0.35444 0.06923-0.58542
   2   8   740543.87 3297.03   1 0.70448-0.48077-0.36640 0.87207 0.60782-0.09131
  -2   8  -863025.65 9834.44   1 0.45841-0.68745 0.88832-0.38297 0.02710-0.61704
   2   8   859849.74 4107.01   1 0.69824-0.46928-0.37733 0.88285 0.60833-0.01847
   2  -8   917421.85 2225.14   1-0.72147 0.95677-0.21471-0.29078 0.65830 0.00489
  -2   8  -914470.52 2946.14   1 0.40895-0.64386 0.91241-0.40713-0.01586-0.64782
   2   8   916362.70 2022.51   1 0.69716-0.46238-0.37943 0.88495 0.60827 0.05532
   2   9  -9 3889.80  844.32   1 0.91297-0.78370 0.00291 0.56592-0.40800-0.25599
  -2   9   9 3699.14  925.33   1 0.79875-0.92909 0.52332 0.04585 0.29684 0.36699
   2   9  -9 4170.45  914.90   1 0.62434-0.49435 0.75905-0.19035 0.18447-0.84816
   2   9  -8 4050.90  875.70   1 0.92228-0.78710-0.01329 0.58213-0.38628-0.20393
  -2   9   8 3604.90  915.58   1 0.81411-0.95022 0.50596 0.06321 0.28499 0.30508
   2   9  -8 2222.44  558.60   1 0.67682-0.54100 0.69541-0.12671 0.24147-0.83141
   2   9  -713472.83 1238.43   1 0.92981-0.78872-0.02747 0.59630-0.36701-0.14943
  -2   9   711114.75 1063.34   1 0.82566-0.96755 0.49222 0.07695 0.27565 0.24067
   2   9  -710935.89 1019.59   1 0.72240-0.58076 0.62495-0.05625 0.29592-0.81212
   2   9  -629554.93 1661.74   1 0.93559-0.78859-0.03918 0.60802-0.35089-0.09177
  -2   9   625399.71 1684.56   1 0.83339-0.98105 0.48269 0.08648 0.26918 0.17338
   2   9  -627553.83 1542.97   1 0.76017-0.61289 0.54902 0.01950 0.34741-0.78992
  -2   9   627591.00 1427.77   1 0.82322-0.97041 0.32807 0.24053 0.46332-0.02076
   2   9  -526155.72 2777.16   1 0.93959-0.78668-0.04778 0.61662-0.33894-0.02994
  -2   9   523875.65 1496.27   1 0.83708-0.99051 0.47803 0.09114 0.26602 0.10278
   2   9  -527971.17 1620.52   1 0.79070-0.63754 0.46769 0.10083 0.39502-0.76378
  -2   9   525967.07 1444.01   1 0.81934-0.97244 0.35123 0.21737 0.45310-0.08430
   2   9  -450167.39 3394.16   1 0.94160-0.78279-0.05231 0.62115-0.33262 0.03751
   2  -9  -451998.86 2796.18   1 0.56623-0.40700-0.54529-0.02373 0.61809-0.91311
  -2   9   449803.88 2745.36   1 0.81317-0.97220 0.38318 0.18534 0.43808-0.14307
   2   9  -453231.88 3048.76   1 0.81322-0.65419 0.38294 0.18558 0.43820-0.73320
   2   9  -382370.67 4238.05   1 0.94112-0.77640-0.05122 0.62005-0.33415 0.11281
   2  -9  -386013.54 4260.03   1 0.29421-0.12928-0.56566-0.00337 0.77036-0.99160
  -2  -9   390997.26 4552.39   1-0.99830 0.83377-0.05455-0.51431 0.02047 0.20074
  -2   9   379936.60 4106.34   1 0.83032-0.99529 0.48652 0.08265 0.27177-0.05049
  -2   9   379989.86 4034.21   1 0.80413-0.96903 0.42124 0.14728 0.41944-0.19818
   2   9  -389703.00 4578.41   1 0.82756-0.66266 0.29672 0.27188 0.47653-0.69781
   2   9  -2 1381.48  307.17   1 0.93689-0.76625-0.04192 0.61076-0.34709 0.19954
   2  -9  -2 1615.11  294.33   1 0.03098 0.13977-0.53815-0.03072 0.84227-0.98970
  -2  -9   2 1756.39  305.61   1-0.99888 0.82843-0.01855-0.55031 0.04333 0.10413
  -2   9   2 1797.13  670.51   1 0.81785-0.98860 0.50157 0.06760 0.28201-0.13449
  -2   9   2 2428.06  468.85   1 0.79190-0.96268 0.46390 0.10462 0.39709-0.24958
   2   9  -2 2200.32  412.49   1 0.83442-0.66361 0.21058 0.35802 0.50930-0.65682
   2   9  -113426.39 1394.78   1 0.92575-0.74920-0.01969 0.58852-0.37761 0.30384
   2  -9  -1 8538.99  940.13   1-0.18717 0.36370-0.48540-0.08350 0.85401-0.92776
  -2  -9   1 8551.59 1421.64   1-0.99847 0.82210 0.00016-0.56903 0.05518 0.01855
  -2   9   113612.09 1506.70   1 0.79697-0.97350 0.52527 0.04390 0.29817-0.22441
  -2   9   113295.62 1450.34   1 0.77620-0.95285 0.50949 0.05903 0.37138-0.29763
   2   9  -113759.24 1495.48   1 0.83432-0.65761 0.12686 0.44174 0.53648-0.61024
   2  -9   019327.63 2001.92   1-0.35220 0.53459-0.42660-0.14230 0.83304-0.83304
  -2  -9   019743.83 3003.77   1-0.99823 0.81593 0.00624-0.57511 0.05902-0.05902
  -2   9   019972.06 1785.59   1 0.76448-0.94685 0.55875 0.01045 0.32149-0.32149
  -2   9   019163.61 2021.15   1 0.75685-0.93937 0.55654 0.01198 0.34267-0.34267
   2   9   017794.61 1926.04   1 0.82830-0.64572 0.04771 0.52096 0.55823-0.55823
  -2  -9  -1 8317.39  851.71   1 0.45601-0.64418-0.56077-0.00824 0.69107-0.76482
   2  -9   1 9589.71 1058.33   1-0.47117 0.65940-0.37264-0.19626 0.79945-0.72571
  -2  -9  -1 9132.31  938.38   1-0.82644 0.63826-0.11818-0.45058 0.55047-0.62417
  -2  -9  -111039.64 1916.65   1-0.99838 0.81016 0.00262-0.57149 0.05674-0.13048
  -2   9  -111990.07 1336.27   1 0.71601-0.90419 0.60281-0.03360 0.35204-0.42580
  -2   9  -112070.91 1321.61   1 0.73413-0.92236 0.60359-0.03489 0.31099-0.38473
   2   9   111221.18 1276.59   1 0.81791-0.62941-0.02531 0.59399 0.57478-0.50100
   2  -9   2 4361.40  580.78   1-0.55481 0.74890-0.32770-0.24120 0.76471-0.61722
  -2  -9  -2 5963.90 1234.42   1-0.99873 0.80458-0.00868-0.56018 0.04958-0.19706
  -2   9  -2 4445.26  595.92   1 0.64427-0.83825 0.65754-0.08833 0.39056-0.53808
  -2   9  -2 5335.77  823.67   1 0.70749-0.90155 0.64996-0.08126 0.27748-0.42496
   2   9   2 2879.56  563.57   1 0.80463-0.61021-0.09062 0.65930 0.58681-0.43926
   2  -9   331252.11 1870.58   1-0.61265 0.81263-0.29250-0.27618 0.73423-0.51316
  -2  -9  -331691.39 1934.24   1-0.99891 0.79884-0.02626-0.54260 0.03845-0.25967
  -2   9  -330325.72 1703.94   1 0.53749-0.73743 0.72133-0.15202 0.43677-0.65808
  -2   9  -332592.04 1935.94   1 0.67732-0.87720 0.69472-0.12602 0.24205-0.46327
   2   9   329936.68 1823.88   1 0.78968-0.58947-0.14695 0.71583 0.59565-0.37429
   2  -9   413140.18 1049.84   1-0.65218 0.85805-0.26621-0.30247 0.70977-0.41502
  -2  -9  -412487.74 1001.84   1-0.99850 0.79251-0.04905-0.51981 0.02397-0.31893
  -2   9  -412439.46  830.66   1 0.37829-0.58408 0.78735-0.21804 0.48678-0.78186
  -2   9  -412131.05 1035.42   1 0.64377-0.84947 0.73724-0.16854 0.20501-0.49998
   2   9   412039.20  937.18   1 0.77524-0.56915-0.19433 0.76321 0.60102-0.30587
   2  -9   5  832.36  447.67   1-0.67841 0.89017-0.24760-0.32108 0.69169-0.32325
  -2  -9  -5  916.35  393.26   1-0.99706 0.78514-0.07625-0.49261 0.00663-0.37533
  -2   9  -5  414.26  390.55   1 0.60721-0.81877 0.77695-0.20843 0.16622-0.53493
   2   9   5 1252.02  563.53   1 0.76215-0.55019-0.23230 0.80118 0.60427-0.23534
   2  -9   630199.05 2575.06   1-0.69481 0.91245-0.23544-0.33324 0.67956-0.23742
  -2   9  -626910.12 2265.47   1 0.56741-0.78479 0.81361-0.24509 0.12677-0.56922
   2   9   624077.18 2044.98   1 0.75135-0.53351-0.26097 0.82985 0.60609-0.16337
   2  -9   732071.67 2327.36   1-0.70371 0.92723-0.22866-0.34002 0.67268-0.15686
  -2   9  -731471.48 2296.41   1 0.52470-0.74791 0.84689-0.27837 0.08641-0.60260
   2   9   730582.23 2248.30   1 0.74349-0.51978-0.28060 0.84949 0.60701-0.09051
   2  -9   8 8990.27 1129.69   1-0.70668 0.93609-0.22636-0.34232 0.67033-0.08083
  -2   9  -810323.42 1249.94   1 0.47919-0.70823 0.87653-0.30802 0.04530-0.63524
   2   9   811832.04 1330.65   1 0.73897-0.50938-0.29148 0.86036 0.60741-0.01712
   2  -9   913831.45 1855.85   1-0.70477 0.94007-0.22784-0.34085 0.67184-0.00864
  -2   9  -911496.99 2401.38   1 0.43150-0.66641 0.90210-0.33366 0.00306-0.66675
   2   9   917317.29 2056.06   1 0.73798-0.50251-0.29382 0.86271 0.60748 0.05659
   2  10  -8 5294.68 1408.92   1 0.90510-0.76992 0.01569 0.61634-0.42490-0.16531
  -2  10   8 5643.85  830.99   1 0.80959-0.94571 0.51116 0.12125 0.28854 0.30154
   2  10  -8 6313.09  772.48   1 0.68108-0.54526 0.68952-0.05764 0.24633-0.83627
   2  10  -7 1932.04  613.67   1 0.91215-0.77106 0.00427 0.62776-0.40982-0.10662
  -2  10   7 1746.73  740.39   1 0.82048-0.96236 0.49846 0.13396 0.27989 0.23643
   2  10  -7 1183.20  545.71   1 0.72336-0.58172 0.62326 0.00862 0.29714-0.81334
   2  10  -611993.98 1135.79   1 0.91717-0.77018-0.00424 0.63628-0.39845-0.04421
  -2  10   610468.58 1171.70   1 0.82765-0.97531 0.48979 0.14262 0.27400 0.16856
   2  10  -611166.17 1009.32   1 0.75850-0.61121 0.55284 0.07885 0.34501-0.78752
  -2  10   6 8911.20  748.45   1 0.81667-0.96387 0.36545 0.26633 0.44663-0.00407
   2  10  -516088.25 1454.47   1 0.91996-0.76705-0.00912 0.64116-0.39190 0.02301
   2  10  -516390.08 1486.84   1 0.78723-0.63407 0.47835 0.15334 0.38915-0.75791
  -2  10   515444.52 1370.71   1 0.81309-0.96625 0.38355 0.24814 0.43791-0.06915
   2  10  -4  354.15  350.67   1 0.92001-0.76120-0.00922 0.64126-0.39176 0.09665
  -2  10   4  832.38  676.27   1 0.82990-0.98910 0.48703 0.14538 0.27212 0.02291
   2  10  -4 -232.41  387.93   1 0.80902-0.64999 0.40153 0.23016 0.42924-0.72424
  -2  10   4  177.45  251.83   1 0.80715-0.96618 0.40927 0.22242 0.42542-0.13042
   2  10  -315093.83 1044.63   1 0.91633-0.75161-0.00279 0.63483-0.40039 0.17906
   2 -10  -317149.52 1095.31   1 0.30246-0.13753-0.56584-0.06642 0.76703-0.98826
  -2  10   316614.55 1356.60   1 0.82387-0.98885 0.49439 0.13802 0.27712-0.05584
  -2  10   316590.59 1185.00   1 0.79866-0.96356 0.44131 0.19038 0.40912-0.18786
   2  10  -317436.89 1226.47   1 0.82384-0.65894 0.32402 0.30776 0.46507-0.68635
   2  10  -289866.42 5414.04   1 0.90674-0.73611 0.01308 0.61895-0.42147 0.27391
   2 -10  -288644.56 5303.79   1 0.04386 0.12689-0.54043-0.09165 0.84024-0.98767
  -2 -10   291395.57 5512.81   1-0.99614 0.82569-0.08776-0.54430-0.00071 0.14819
  -2  10   286769.61 5296.71   1 0.81173-0.98248 0.50871 0.12370 0.28687-0.13935
  -2  10   284722.89 5142.45   1 0.78731-0.95809 0.47810 0.15359 0.38929-0.24179
   2  10  -279533.48 4844.16   1 0.83241-0.66160 0.24699 0.38479 0.49606-0.64359
   2 -10  -119717.17 1666.04   1-0.16711 0.34365-0.49140-0.14072 0.85475-0.92849
  -2 -10   118580.85 1582.28   1-0.88747 0.71106-0.04367-0.58828 0.45878-0.38509
  -2 -10   120888.28 1856.38   1-0.99779 0.82142-0.06490-0.56717 0.01388 0.05985
  -2  10   119526.27 1744.33   1 0.79176-0.96828 0.53092 0.10150 0.30204-0.22828
  -2  10   120787.78 1835.72   1 0.77286-0.94951 0.51822 0.11347 0.36622-0.29247
   2  10  -121325.61 1919.33   1 0.83517-0.65847 0.17229 0.45949 0.52229-0.59605
   2 -10   0 9782.84  915.26   1-0.32705 0.50944-0.43673-0.19538 0.83803-0.83803
  -2 -10   0 9999.04  879.67   1-0.84384 0.66155-0.09886-0.53309 0.52739-0.52739
  -2 -10   0 9680.17 1024.70   1-0.99830 0.81600-0.05440-0.57767 0.02057-0.02057
  -2  10   0 8250.02  812.45   1 0.76114-0.94351 0.56200 0.07045 0.32373-0.32373
  -2  10   0 8795.20  880.10   1 0.75511-0.93764 0.56040 0.07129 0.34021-0.34021
   2  10   010555.52 1053.35   1 0.83295-0.65037 0.10162 0.53024 0.54392-0.54392
   2 -10   113970.63 1253.37   1-0.44358 0.63181-0.38612-0.24599 0.80878-0.73504
  -2 -10  -112396.88 1039.27   1-0.73254 0.54432-0.20573-0.42614 0.64888-0.72257
  -2 -10  -113354.43 1292.89   1-0.99834 0.81011-0.05353-0.57853 0.02112-0.09486
  -2  10  -1 9246.82 1004.78   1 0.71620-0.90437 0.60265 0.02980 0.35194-0.42569
  -2  10  -1 9391.66 1007.82   1 0.73427-0.92250 0.60332 0.02855 0.31117-0.38492
   2  10   1 9299.16  969.27   1 0.82697-0.63847 0.03614 0.59572 0.56107-0.48730
   2 -10   252175.24 3223.65   1-0.52688 0.72096-0.34343-0.28868 0.77746-0.62997
  -2 -10  -253309.68 3366.11   1-0.99803 0.80388-0.06041-0.57166 0.01674-0.16422
  -2  10  -240297.49 2504.06   1 0.65067-0.84464 0.65310-0.02064 0.38740-0.53492
  -2  10  -244148.60 2789.68   1 0.70974-0.90380 0.64632-0.01443 0.28022-0.42770
   2  10   243873.80 2800.89   1 0.81834-0.62392-0.02282 0.65469 0.57427-0.42672
   2 -10   3 3853.01  680.08   1-0.58553 0.78552-0.30944-0.32243 0.74926-0.52819
  -2 -10  -3 5332.60  903.32   1-0.99724 0.79717-0.07365-0.55841 0.00829-0.22951
  -2  10  -3 4292.44  614.07   1 0.55448-0.75442 0.71236-0.07980 0.43020-0.65151
  -2  10  -3 4024.87  725.61   1 0.68181-0.88169 0.68849-0.05661 0.24718-0.46840
   2  10   3 4621.36  794.89   1 0.80828-0.60794-0.07440 0.70627 0.58407-0.36274
   2 -10   413491.15  938.89   1-0.62637 0.83225-0.28360-0.34827 0.72609-0.43134
  -2 -10  -415447.50 1093.27   1-0.99572 0.78973-0.09224-0.53983-0.00358-0.29137
  -2  10  -416686.79  894.90   1 0.41269-0.61847 0.77561-0.14305 0.47759-0.77267
  -2  10  -416601.97 1025.06   1 0.65055-0.85626 0.72917-0.09728 0.21232-0.50729
   2  10   418918.35 1136.45   1 0.79793-0.59167-0.11801 0.74987 0.59107-0.29597
   2 -10   535018.71 2892.57   1-0.65407 0.86583-0.26490-0.36697 0.70852-0.34008
  -2 -10  -537648.48 3098.55   1-0.99315 0.78123-0.11538-0.51669-0.01840-0.35028
  -2  10  -543148.03 3526.37   1 0.61628-0.82784 0.76771-0.13602 0.17550-0.54421
   2  10   535456.16 2918.98   1 0.78793-0.57596-0.15308 0.78517 0.59642-0.22749
   2 -10   6 6008.69 1397.03   1-0.67191 0.88955-0.25231-0.37956 0.69632-0.25419
   2  10   6 8155.83  873.06   1 0.77981-0.56197-0.18005 0.81214 0.59955-0.15683
   2 -10   7 3111.82  803.81   1-0.68214 0.90566-0.24487-0.38700 0.68899-0.17317
  -2  10  -7  686.39  411.32   1 0.53806-0.76127 0.83708-0.20540 0.09884-0.61503
   2  10   7 1483.26  580.88   1 0.77381-0.55010-0.19867 0.83076 0.60144-0.08493
   2 -10   8 7109.38 1115.46   1-0.68630 0.91571-0.24180-0.39007 0.68594-0.09643
  -2  10  -8 4980.06  733.93   1 0.49450-0.72354 0.86717-0.23548 0.05893-0.64887
   2  10   8 4122.19 1153.98   1 0.77035-0.54076-0.20899 0.84108 0.60239-0.01209
  -2 -11   812070.75 1612.31   1-0.88550 0.75030-0.04642-0.64873 0.46230 0.12725
  -2  11   812830.77 1800.01   1 0.80257-0.93868 0.51909 0.17656 0.29395 0.29612
   2  11  -811159.04 1423.54   1 0.68216-0.54635 0.68800 0.00706 0.24758-0.83752
  -2 -11   719446.86 1785.62   1-0.89171 0.75062-0.03761-0.65753 0.45102 0.06483
  -2  11   716728.43 1767.63   1 0.81284-0.95473 0.50742 0.18823 0.28599 0.23032
   2  11  -719482.37 1780.10   1 0.72189-0.58025 0.62583 0.06923 0.29528-0.81148
  -2  11   615861.44 1785.07   1 0.81948-0.96714 0.49964 0.19602 0.28069 0.16186
   2  11  -616385.24 1710.49   1 0.75506-0.60778 0.56051 0.13435 0.34014-0.78265
   2  11  -5 1658.33  654.75   1 0.78253-0.62937 0.49209 0.20277 0.38142-0.75018
  -2  11   5 1582.77  529.72   1 0.80557-0.95872 0.41562 0.27924 0.42226-0.05350
  -2 -11   4 3544.79  763.50   1-0.89384 0.73510-0.03452-0.66063 0.44703-0.15225
  -2  11   4 7226.91 1472.78   1 0.82092-0.98013 0.49793 0.19773 0.27953 0.01551
   2  11  -4 7676.84 1525.16   1 0.80389-0.64486 0.42214 0.27272 0.41898-0.71398
  -2  11   4 4240.10  848.69   1 0.79998-0.95901 0.43661 0.25825 0.41156-0.11656
  -2 -11   3  289.49  316.13   1-0.88604 0.72141-0.04566-0.64948 0.46133-0.24025
  -2  11   3 2085.63  437.44   1 0.81469-0.97967 0.50528 0.19038 0.28453-0.06325
  -2  11   3 4129.84  633.65   1 0.79196-0.95687 0.46370 0.23116 0.39719-0.17594
   2  11  -3 4192.97  733.23   1 0.81919-0.65429 0.35205 0.34291 0.45273-0.67402
   2 -11  -2  598.05  237.54   1 0.06882 0.10193-0.54458-0.15071 0.83587-0.98330
  -2 -11   2  671.66  376.82   1-0.87000 0.69948-0.06714-0.62800 0.48844-0.34105
  -2  11   2  621.20  410.56   1 0.80258-0.97333 0.51908 0.17657 0.29395-0.14643
  -2  11   2   40.02  300.94   1 0.78130-0.95208 0.49554 0.19932 0.37945-0.23195
   2  11  -2 1437.58  592.19   1 0.82918-0.65838 0.28270 0.41226 0.48221-0.62973
   2 -11  -123642.62 1230.28   1-0.13794 0.31447-0.49970-0.19563 0.85514-0.92888
  -2 -11   121869.20 1121.67   1-0.83902 0.66262-0.10434-0.59081 0.53399-0.46030
  -2  11   123869.59 1379.36   1 0.78291-0.95948 0.54014 0.15555 0.30869-0.23493
  -2  11   125069.30 1412.62   1 0.76780-0.94445 0.53093 0.16393 0.35858-0.28483
   2  11  -126269.92 1529.56   1 0.83421-0.65751 0.21561 0.47934 0.50753-0.58129
   2 -11   039500.26 1961.68   1-0.29503 0.47741-0.44897-0.24635 0.84343-0.84343
  -2 -11   038814.97 2055.85   1-0.99369 0.81139-0.11100-0.58428-0.01559 0.01559
  -2  11   043599.03 2263.38   1 0.75354-0.93591 0.56928 0.12641 0.32877-0.32877
  -2  11   041441.64 2131.89   1 0.75127-0.93379 0.56874 0.12612 0.33483-0.33483
   2  11   041310.41 2166.93   1 0.83503-0.65242 0.15206 0.54290 0.52877-0.52877
   2 -11   123543.37 1254.17   1-0.41069 0.59892-0.40141-0.29392 0.81865-0.74491
  -2 -11  -121188.19 1269.14   1-0.99422 0.80600-0.10652-0.58875-0.01272-0.06101
  -2  11  -122395.13 1271.54   1 0.71086-0.89903 0.60712 0.08857 0.35506-0.42881
  -2  11  -123317.15 1352.53   1 0.73188-0.92011 0.60781 0.08725 0.30806-0.38180
   2  11   119624.32 1192.68   1 0.83240-0.64390 0.09327 0.60178 0.54626-0.47248
   2 -11   219312.60 1095.67   1-0.49456 0.68864-0.36071-0.33462 0.79075-0.64326
  -2 -11  -222385.74 1380.02   1-0.99385 0.79970-0.10973-0.58554-0.01478-0.13269
  -2  11  -218820.91 1054.70   1 0.64952-0.84350 0.65390 0.04180 0.38797-0.53549
  -2  11  -221467.75 1373.11   1 0.70902-0.90308 0.64749 0.04757 0.27934-0.42682
   2  11   219683.94 1219.30   1 0.82743-0.63301 0.04002 0.65503 0.56013-0.41258
   2 -11   332939.35 2698.81   1-0.55469 0.75462-0.32777-0.36755 0.76476-0.54354
  -2  11  -332860.76 2633.23   1 0.56068-0.76063 0.70898-0.01316 0.42774-0.64905
  -2  11  -334586.24 2858.69   1 0.68292-0.88279 0.68694 0.00813 0.24845-0.46967
   2  11   330720.90 2591.51   1 0.82099-0.62065-0.00679 0.70184 0.57089-0.34956
   2 -11   4 8328.42 1625.69   1-0.59712 0.80300-0.30230-0.39276 0.74299-0.44824
  -2  11  -4 7218.24 1424.68   1 0.65358-0.85928 0.72549-0.03041 0.21561-0.51058
   2  11   4 7630.64 1526.81   1 0.81400-0.60774-0.04660 0.74165 0.57899-0.28389
   2 -11   5  157.41  389.72   1-0.62654 0.83830-0.28349-0.41157 0.72599-0.35755
  -2  11  -5 1228.28  619.54   1 0.62105-0.83258 0.76256-0.06749 0.18105-0.54977
   2  11   5 1222.05  599.29   1 0.80726-0.59508-0.07903 0.77409 0.58487-0.21599
   2 -11   610303.42 1476.60   1-0.64600 0.86365-0.27045-0.42461 0.71381-0.27167
  -2  11  -612817.68 1684.04   1 0.58562-0.80301 0.79757-0.10272 0.14458-0.58703
   2  11   612635.78 1654.03   1 0.80147-0.58337-0.10386 0.79891 0.58893-0.14628
   2 -11   7 2870.26  847.99   1-0.65770 0.88123-0.26237-0.43268 0.70610-0.19028
  -2  11  -7 5199.76  870.88   1 0.54690-0.77011 0.83030-0.13545 0.10715-0.62335
   2  11   7 6051.67 1011.53   1 0.79717-0.57315-0.12094 0.81599 0.59150-0.07508
  -2 -12   618694.46 1687.07   1-0.86913 0.72215-0.06826-0.69008 0.48984-0.04767
  -2  12   619834.25 1890.98   1 0.80906-0.95672 0.51177 0.24713 0.28895 0.15360
   2  12  -619344.37 1828.38   1 0.75009-0.60281 0.57125 0.18678 0.33320-0.77571
  -2 -12   511439.67 1445.14   1-0.86770 0.71484-0.07008-0.68826 0.49211-0.12363
  -2  12   513760.13 1790.26   1 0.81141-0.96484 0.50908 0.24982 0.28712 0.08167
  -2  12   513159.08 1621.06   1 0.79678-0.94994 0.44781 0.31022 0.40570-0.03695
   2  12  -513424.47 1782.03   1 0.77666-0.62350 0.50827 0.24976 0.37209-0.74085
  -2 -12   4 5103.26  943.80   1-0.86159 0.70284-0.07774-0.68060 0.50160-0.20682
  -2  12   4 6032.61 1195.28   1 0.80959-0.96880 0.51116 0.24774 0.28854 0.00649
   2  12  -4 4699.85  939.86   1 0.79779-0.63876 0.44433 0.31370 0.40753-0.70254
  -2  12   4 3025.22  626.61   1 0.79160-0.95064 0.46484 0.29319 0.39658-0.10157
  -2 -12   3 1955.35  559.38   1-0.84868 0.68405-0.09325-0.66509 0.52060-0.29952
  -2  12   3 1762.75  780.59   1 0.80302-0.96799 0.51860 0.24030 0.29361-0.07233
  -2  12   3 1304.60  566.50   1 0.78404-0.94894 0.48776 0.27028 0.38388-0.16262
  -2 -12   216609.74 1213.01   1-0.82491 0.65439-0.11982-0.63853 0.55241-0.40502
  -2  12   214479.53 1192.57   1 0.79063-0.96139 0.53200 0.22694 0.30310-0.15559
  -2  12   218453.68 1498.85   1 0.77396-0.94474 0.51538 0.24265 0.36791-0.22041
   2  12  -215292.66 1308.12   1 0.82474-0.65394 0.31786 0.44028 0.46770-0.61522
  -2  12   1 3423.33  839.13   1 0.77111-0.94767 0.55219 0.20675 0.31697-0.24321
  -2  12   1 5171.09 1035.13   1 0.76121-0.93786 0.54663 0.21140 0.34891-0.27516
   2  12  -1 3640.57  850.13   1 0.83160-0.65490 0.25731 0.50083 0.49215-0.56591
   2 -12   0 1448.46  414.43   1-0.25640 0.43879-0.46285-0.29569 0.84854-0.84854
  -2  12   0 1127.63  597.67   1 0.74228-0.92465 0.57975 0.17919 0.33601-0.33601
  -2  12   0 2090.86  642.29   1 0.74564-0.92816 0.58053 0.17750 0.32710-0.32710
   2  12   0 1077.91  446.33   1 0.83476-0.65216 0.20000 0.55814 0.51299-0.51299
   2 -12   1 7535.61 1410.06   1-0.37254 0.56078-0.41811-0.34042 0.82848-0.75474
  -2  12  -110253.35  930.05   1 0.70096-0.88913 0.61524 0.14370 0.36073-0.43449
  -2  12  -1 7333.01 1476.84   1 0.72739-0.91563 0.61604 0.14221 0.30228-0.37602
   2  12   1 9875.15 1050.47   1 0.83493-0.64642 0.14689 0.61124 0.53038-0.45662
   2 -12   2 5487.75 1244.00   1-0.45783 0.65191-0.37924-0.37930 0.80409-0.65660
  -2  12  -211061.72  909.75   1 0.64234-0.83632 0.65887 0.10007 0.39150-0.53902
  -2  12  -210917.87  977.12   1 0.70588-0.89993 0.65254 0.10571 0.27552-0.42300
   2 -12   3 2163.05  494.84   1-0.51985 0.71978-0.34727-0.41127 0.78048-0.55925
  -2  12  -3 3113.28  597.33   1 0.55847-0.75841 0.71020 0.04888 0.42862-0.64993
  -2  12  -3 3193.05  715.91   1 0.68126-0.88114 0.68926 0.06899 0.24655-0.46778
   2  12   3 2846.90  755.26   1 0.82923-0.62889 0.05648 0.70175 0.55603-0.33470
   2 -12   416940.45 1784.54   1-0.56443 0.77021-0.32211-0.43643 0.76003-0.46506
  -2  12  -414089.31 1570.50   1 0.65353-0.85923 0.72555 0.03270 0.21556-0.51053
   2  12   411870.28 1357.56   1 0.82496-0.61870 0.02036 0.73787 0.56481-0.26971
   2 -12   510897.64 1409.09   1-0.59572 0.80748-0.30317-0.45507 0.74376-0.37532
  -2  12  -5 7620.24 1079.70   1 0.62267-0.83420 0.76084-0.00258 0.18273-0.55145
   2  12   5 7689.68 1064.16   1 0.82063-0.60845-0.00907 0.76731 0.57138-0.20250
   2 -12   6 5987.86  962.55   1-0.61699 0.83463-0.28971-0.46854 0.73169-0.28956
  -2  12  -6 2951.60 1036.71   1 0.58895-0.80633 0.79452-0.03649 0.14787-0.59033
   2  12   6 1628.66  529.86   1 0.81681-0.59871-0.03153 0.78977 0.57604-0.13338
  -2 -13   5 8590.47 1178.02   1-0.83400 0.68114-0.10994-0.71160 0.54069-0.17221
  -2  13   5 7658.30 1293.05   1 0.79833-0.95176 0.52379 0.29835 0.29716 0.07163
   2  13  -5 7346.19 1028.58   1 0.76963-0.61648 0.52639 0.29481 0.36133-0.73009
  -2 -13   429188.50 2478.90   1-0.82373 0.66498-0.12108-0.70046 0.55389-0.25912
  -2  13   428381.33 2524.86   1 0.79602-0.95523 0.52631 0.29583 0.29889-0.00384
   2  13  -427003.15 2346.41   1 0.79068-0.63165 0.46776 0.35344 0.39498-0.68999
  -2  13   425010.82 2143.33   1 0.78195-0.94098 0.49373 0.32747 0.38049-0.08548
  -2  13   316082.45 2061.38   1 0.78894-0.95390 0.53380 0.28838 0.30434-0.08307
  -2  13   320622.25 2506.12   1 0.77484-0.93975 0.51306 0.30814 0.36928-0.14802
   2  13  -321143.01 2565.12   1 0.80710-0.64220 0.40948 0.41172 0.42532-0.64657
  -2  13   2 2312.90  712.50   1 0.77621-0.94697 0.54704 0.27515 0.31343-0.16591
  -2  13   2 2302.30  625.83   1 0.76529-0.93607 0.53701 0.28419 0.35487-0.20736
   2  13  -2 1746.46  661.27   1 0.81909-0.64829 0.35260 0.46871 0.45249-0.60001
  -2  13   1 3346.57  679.82   1 0.75647-0.93304 0.56649 0.25569 0.32684-0.25308
  -2  13   1 4144.54  727.80   1 0.75318-0.92983 0.56462 0.25658 0.33750-0.26375
   2  13  -1 3185.62  712.12   1 0.82744-0.65074 0.29772 0.52360 0.47612-0.54988
  -2  13   015211.70 1618.04   1 0.72774-0.91011 0.59274 0.22945 0.34503-0.34503
  -2  13   016131.90 1686.96   1 0.73862-0.92102 0.59499 0.22645 0.31689-0.31689
   2  13   017891.67 1933.92   1 0.83249-0.64988 0.24587 0.57545 0.49649-0.49649
   2 -13   1 1271.36  355.57   1-0.32905 0.51728-0.43595-0.38580 0.83765-0.76391
  -2  13  -1 1641.04  452.79   1 0.68707-0.87524 0.62624 0.19595 0.36844-0.44220
  -2  13  -1  355.91  351.58   1 0.72108-0.90931 0.62725 0.19420 0.29426-0.36801
   2  13   1 1186.91  542.94   1 0.83482-0.64631 0.19786 0.62345 0.51372-0.43996
   2 -13   2 5025.10  902.47   1-0.41650 0.61058-0.39877-0.42298 0.81700-0.66952
  -2  13  -2 4904.08  893.82   1 0.63005-0.82402 0.66715 0.15503 0.39740-0.54492
  -2  13  -2 5251.94 1069.51   1 0.70065-0.89471 0.66074 0.16070 0.26924-0.41672
   2  13   2 3541.22  770.04   1 0.83506-0.64065 0.15441 0.66690 0.52803-0.38051
   2 -13   3 8407.58  890.83   1-0.48093 0.68086-0.36772-0.45403 0.79591-0.57468
  -2  13  -3 7767.86  911.05   1 0.67727-0.87714 0.69480 0.12665 0.24198-0.46321
   2  13   310244.76 1141.90   1 0.83376-0.63342 0.11618 0.70524 0.53975-0.31843
   2 -13   4 1255.56  558.18   1-0.52790 0.73368-0.34287-0.47888 0.77701-0.48204
  -2  13  -4  494.73  418.35   1 0.65086-0.85657 0.72879 0.09265 0.21266-0.50763
   2  13   4 1944.32  723.95   1 0.83168-0.62542 0.08358 0.73784 0.54891-0.25381
  -2  14   210022.38 1395.45   1 0.75931-0.93007 0.56377 0.32166 0.32496-0.17744
  -2  14   2 7192.31 1058.16   1 0.75527-0.92605 0.56004 0.32433 0.34044-0.19293
   2  14  -210768.38 1416.60   1 0.81236-0.64159 0.38688 0.49749 0.43632-0.58382
  -2  14   1 3983.87 1161.84   1 0.73911-0.91568 0.58262 0.30280 0.33801-0.26425
  -2  14   1 6061.29  978.59   1 0.74374-0.92039 0.58440 0.29997 0.32452-0.25077
   2  14  -1 3661.19 1093.05   1 0.82177-0.64507 0.33711 0.54738 0.45938-0.53314
  -2  14   0 2232.43  745.92   1 0.71010-0.89247 0.60775 0.27768 0.35550-0.35550
  -2  14   0 2102.05  719.35   1 0.72983-0.91223 0.61161 0.27302 0.30540-0.30540
   2  14   0  984.28  494.95   1 0.82835-0.64575 0.29008 0.59441 0.47924-0.47924
  -2  14  -112884.55 1598.24   1 0.66950-0.85768 0.63954 0.24589 0.37781-0.45157
  -2  14  -113556.25 1664.20   1 0.71308-0.90131 0.64084 0.24379 0.28431-0.35805
   2  14   117158.56 2122.32   1 0.83243-0.64393 0.24662 0.63787 0.49620-0.42244
  -2  14  -211654.44 1481.96   1 0.69356-0.88761 0.67152 0.21311 0.26082-0.40831
   2  14   211973.62 1531.20   1 0.83453-0.64012 0.20735 0.67714 0.51043-0.36291
   3   0 -12 2708.64  908.17   1 0.96297-0.76022-0.11239 0.11239-0.24502-0.63986
   3   0 -11 7933.74 1419.25   1 0.97107-0.76239-0.15386 0.15386-0.18259-0.62855
   3   0 -1032171.25 3451.61   1 0.97363-0.75903-0.19605 0.19605-0.11657-0.62083
   3   0  -924734.45 2432.45   1 0.96986-0.74932-0.23923 0.23923-0.04619-0.61747
  -3   0   922148.97 1296.83   1 0.36539-0.58634 0.79126-0.79126 0.49029 0.17350
   3   0  -841168.35 2175.69   1 0.95835-0.73198-0.28405 0.28405 0.02930-0.61927
  -3   0   838619.76 2016.17   1 0.38236-0.60929 0.78603-0.78603 0.48574 0.10441
   3   0  -719993.93 1915.36   1 0.93735-0.70508-0.33009 0.33009 0.11138-0.62761
  -3   0   719043.41  879.02   1 0.38619-0.61897 0.78477-0.78477 0.48474 0.03163
  -3   0   716417.06  563.53   1 0.64613-0.87897-0.46905 0.46905 0.60207-0.08594
   3   0  -640035.38 1515.60   1 0.90405-0.66584-0.37701 0.37701 0.20134-0.64382
  -3   0   635278.59 1322.65   1 0.37527-0.61380 0.78815-0.78815 0.48782-0.04529
  -3   0   637494.63 1241.10   1 0.53593-0.77447-0.61867 0.61867 0.57446-0.13199
   3   0  -5  946.28  296.88   1 0.85385-0.60977-0.42530 0.42530 0.30007-0.66880
  -3   0   5 1011.60  381.77   1 0.34632-0.59071 0.79696-0.79696 0.49487-0.12610
   3   0  -5   -0.30   25.35   1 0.50932-0.26482 0.85753-0.85753 0.07231-0.44103
   3   0  -443169.36 1177.91   1 0.78075-0.53070-0.47314 0.47313 0.40811-0.70320
  -3   0   444159.82 1256.45   1 0.29705-0.54730 0.81000-0.81000 0.50562-0.21060
  -3   0   3218059.6 5165.11   1 0.22451-0.48062 0.82493-0.82493 0.51872-0.29745
   3   0  -3200401.7 4732.33   1 0.58471-0.32858 0.69535-0.69535 0.41784-0.63915
   3   0  -3214174.0 4980.94   1-0.09288 0.34904 0.92579-0.92579-0.36643 0.14516
   3   0  -3218111.3 5058.85   1 0.74772-0.49147-0.27017 0.27017 0.60656-0.82792
  -3   0   2327562.2 4715.45   1 0.12699-0.38893 0.83731-0.83731 0.53176-0.38423
   3   0  -2294910.3 4221.59   1 0.43748-0.17552 0.76634-0.76634 0.47045-0.61798
   3   0  -2296267.0 4168.76   1-0.00331 0.26532 0.94996-0.94996-0.31232 0.16480
   3   0  -2319900.1 4467.62   1 0.48654-0.22461-0.67248 0.67248 0.55771-0.70520
   3   0  -153326.41  962.08   1 0.34963-0.08182-0.56600 0.56600 0.74658-0.82032
  -3   0   156395.75 1030.65   1 0.00476-0.27257 0.84143-0.84143 0.54034-0.46657
   3   0  -156064.44  930.27   1 0.07073 0.19703 0.96133-0.96133-0.26614 0.19238
   3   0   0943110.721775.99   1 0.13675 0.13675-0.55408 0.55408 0.82115-0.82115
   3   0   0895565.420694.99   1 0.13684 0.13684 0.83659-0.83659 0.53045-0.53045
   3   0   0916772.921173.12   1 0.13680 0.13680 0.96543-0.96543-0.22185 0.22185
   3   0   1184850.0 2738.19   1-0.07585 0.35516-0.51566 0.51566 0.85342-0.77970
  -3   0  -1181181.6 2694.63   1-0.28876 0.00929 0.79880-0.79880 0.52775-0.60151
   3   0   1180429.1 2680.32   1 0.00694 0.27260 0.84146-0.84146 0.54026-0.46649
  -3   0  -1189381.2 2831.82   1-0.05823-0.22131 0.93645-0.93645-0.34592 0.27216
  -3   0  -234288.63  670.53   1-0.57179 0.28651-0.31777 0.31777 0.75635-0.90384
  -3   0  -237832.34  800.07   1-0.43992 0.15468 0.74496-0.74496 0.50148-0.64891
   3   0   232430.37  662.20   1-0.09894 0.38436 0.83501-0.83501 0.54126-0.39372
  -3   0  -234905.64  890.63   1-0.01548-0.26991 0.94733-0.94733-0.31988 0.17236
   3   0   337566.44 1056.84   1-0.39559 0.68671-0.40815 0.40815 0.82274-0.60152
  -3   0  -338581.94 1076.02   1-0.57984 0.28870 0.67165-0.67165 0.46115-0.68230
   3   0   413045.98  591.33   1-0.49158 0.78855-0.36225 0.36225 0.79190-0.49693
  -3   0  -413902.39  548.64   1-0.70188 0.40489 0.58253-0.58253 0.40990-0.70477
   3   0   5 1121.88  336.28   1-0.55507 0.85789-0.32755 0.32755 0.76458-0.39587
  -3   0  -5  596.70  247.69   1-0.80197 0.49940 0.48408-0.48408 0.34999-0.71851
  -3   0  -5  611.65  253.52   1 0.00098-0.30393 0.95085-0.95085-0.30963-0.05915
   3   0   668753.70 2416.58   1-0.59473 0.90354-0.30379 0.30379 0.74431-0.30217
  -3   0  -670468.71 2384.55   1-0.88086 0.57242 0.37741-0.37741 0.28571-0.72793
  -3   0  -671368.10 2496.73   1-0.01420-0.29458 0.94761-0.94761-0.31909-0.12345
   3   0   7101029.1 5080.80   1-0.61813 0.93283-0.28897 0.28897 0.73102-0.21520
  -3   0  -799876.86 4974.59   1-0.93844 0.62403 0.26771-0.26771 0.21827-0.73410
  -3   0  -7102681.4 5160.93   1-0.03567-0.27896 0.94250-0.94250-0.33228-0.18402
   3   0   8 9798.49  851.92   1-0.62945 0.95003-0.28157 0.28157 0.72422-0.13471
  -3   0  -8 7355.62 1252.51   1-0.97649 0.65618 0.15592-0.15592 0.14880-0.73831
  -3   0  -8 9694.44 1849.71   1-0.06219-0.25830 0.93531-0.93531-0.34829-0.24177
   3   0   9  587.94  359.44   1-0.63164 0.95810-0.28012 0.28012 0.72288-0.05968
  -3   0  -9  759.78  270.08   1-0.99625 0.66949 0.03675-0.03675 0.07825-0.74191
  -3   0  -9  579.60  298.98   1-0.09291-0.23342 0.92578-0.92578-0.36645-0.29737
   3   0  1010386.81 1013.10   1-0.62656 0.95891-0.28347 0.28347 0.72598 0.01090
  -3   0 -1010178.02  883.22   1-0.12729-0.20489 0.91355-0.91355-0.38626-0.35132
   3   0  1113302.54 1347.30   1-0.61538 0.95361-0.29075 0.29075 0.73264 0.07793
   3   1 -12 5216.50 1116.15   1 0.96094-0.75818-0.10598 0.16918-0.25562-0.62971
   3  -1 -12 3968.15 1410.02   1 0.96405-0.76130-0.11666 0.05346-0.23870-0.64618
   3  -1 -1113590.78 2446.71   1 0.97186-0.76319-0.16052 0.09731-0.17234-0.63880
   3   1 -1111878.53 2236.42   1 0.96974-0.76106-0.14464 0.20785-0.19667-0.61447
   3   1 -10 3587.31  869.13   1 0.97352-0.75891-0.18436 0.24757-0.13512-0.60228
   3  -1 -10 3512.84  911.40   1 0.97339-0.75878-0.20529 0.14209-0.10175-0.63564
  -3   1  10 2608.11  604.76   1 0.44633-0.66159 0.76285-0.69960 0.46779 0.26990
   3   1  -910216.86 1604.60   1 0.97187-0.75134-0.22486 0.28807-0.06995-0.59371
   3  -1  -9 9756.86 1536.76   1 0.96749-0.74702-0.25154 0.18834-0.02615-0.63756
  -3  -1   9 8637.00 1067.43   1 0.21114-0.43210 0.82715-0.89041 0.52079 0.14300
  -3   1   910425.45 1329.61   1 0.47548-0.69658 0.75072-0.68747 0.45860 0.20531
   3   1  -843765.11 2326.95   1 0.96378-0.73741-0.26668 0.32988-0.00056-0.58940
   3  -1  -843006.42 3682.60   1 0.95257-0.72620-0.29915 0.23595 0.05574-0.64571
  -3  -1   836512.30 1902.95   1 0.22826-0.45508 0.82428-0.88754 0.51811 0.07192
  -3   1   843748.91 2292.15   1 0.49393-0.72087 0.74250-0.67925 0.45244 0.13770
   3   1  -841855.18 2104.42   1 0.24236-0.01544 0.95912-0.89596-0.14608-0.44386
   3   1  -721738.43 1027.32   1 0.94794-0.71567-0.30964 0.37284 0.07437-0.59059
   3  -1  -713768.34 1616.30   1 0.92609-0.69382-0.34826 0.28506 0.14509-0.66131
  -3  -1   713645.74  699.85   1 0.22794-0.46061 0.82434-0.88759 0.51817-0.00188
  -3   1   719483.59  895.72   1 0.50123-0.73401 0.73913-0.67587 0.44993 0.06645
   3   1  -719642.11  852.45   1 0.40306-0.17031 0.91493-0.85177-0.02075-0.49545
  -3  -1   712810.35  537.52   1 0.73341-0.96615-0.30447 0.24126 0.60777-0.09127
   3   1  -632316.10 1283.09   1 0.92214-0.68397-0.35402 0.41722 0.15593-0.59841
   3  -1  -636389.77 1362.13   1 0.88457-0.64636-0.39797 0.33478 0.24318-0.68565
  -3  -1   632731.02 1216.54   1 0.20915-0.44769 0.82747-0.89073 0.52109-0.07855
  -3   1   632263.39 1343.31   1 0.49619-0.73480 0.74147-0.67821 0.45167-0.00905
   3   1  -629372.84 1019.59   1 0.57703-0.33835 0.80529-0.74212 0.13612-0.57858
  -3  -1   634846.94 1202.60   1 0.69216-0.93082-0.38902 0.32583 0.60792-0.16552
   3  -1  -5109000.8 3332.93   1 0.82224-0.57815-0.44835 0.38516 0.35056-0.71929
  -3  -1   5108514.9 3290.95   1 0.17025-0.41464 0.83295-0.89621 0.52649-0.15771
  -3   1   5116795.9 3575.96   1 0.47678-0.72123 0.75016-0.68690 0.45818-0.08933
   3   1  -5114025.8 3372.62   1 0.74156-0.49714 0.58878-0.52561 0.32159-0.69034
  -3  -1   5106456.0 3154.15   1 0.62324-0.86773-0.50431 0.44112 0.59768-0.22902
   3   1  -4143214.9 3481.72   1 0.82625-0.57628-0.44565 0.50884 0.34452-0.63950
   3  -1  -4126673.5 3078.85   1 0.73210-0.48205-0.49642 0.43322 0.46645-0.76154
  -3  -1   4132173.5 3218.80   1 0.11009-0.36029 0.83864-0.90186 0.53344-0.23837
  -3   1   4139606.6 3405.91   1 0.44007-0.69036 0.76533-0.70207 0.46967-0.17460
   3   1  -4124915.5 2997.18   1 0.61323-0.36288 0.67805-0.61480 0.40519-0.70022
   3   1  -4138342.1 3249.80   1 0.83275-0.58244 0.24217-0.17899 0.49787-0.79291
  -3  -1   4122106.9 2878.44   1 0.52550-0.77573-0.63061 0.56743 0.57111-0.27613
   3   1  -280054.57 1356.02   1 0.62846-0.36665-0.53161 0.59481 0.56782-0.71537
   3  -1  -268432.78 1088.33   1 0.38095-0.11902 0.92377-0.98693-0.03889-0.10859
   3   1  -1  883.08  159.47   1 0.47138-0.20360-0.55926 0.62248 0.68192-0.75567
  -3   1   1 1082.00  156.73   1-0.04084-0.22688-0.52374 0.58695 0.85089-0.77717
  -3   1   1  830.62  205.78   1 0.18890-0.45673 0.83049-0.76724 0.52401-0.45025
  -3   1   1 1446.84  229.50   1-0.01634-0.25151 0.94713-0.88395-0.32041 0.39417
   3   1  -1  684.11  149.98   1 0.46644-0.19867-0.69252 0.75570 0.55030-0.62404
   3   1   026285.64  568.09   1 0.27468-0.00103-0.56505 0.62828 0.77798-0.77798
  -3  -1   033116.68  668.46   1-0.02209-0.25142-0.52778 0.46457 0.84908-0.84908
  -3   1   026360.25  626.74   1 0.05023-0.32391 0.84138-0.77815 0.53810-0.53810
   3  -1   033765.67  690.36   1 0.32944-0.05575 0.80170-0.86495 0.49873-0.49873
   3   1   026048.04 1412.23   1-0.07116 0.34486 0.93266-0.86948-0.35364 0.35364
  -3   1   027116.83  579.52   1 0.07805-0.35167 0.96208-0.89890-0.26133 0.26133
   3  -1   032341.59  687.20   1 0.35914-0.08554 0.93157-0.99473-0.05649 0.05649
   3  -1   152101.55  998.44   1-0.17922 0.45865-0.48780 0.42459 0.85435-0.78061
  -3  -1  -151866.51  994.77   1-0.45499 0.17565 0.73828-0.80148 0.49791-0.57163
   3   1   151136.13  906.32   1 0.01954 0.26000 0.95438-0.89119-0.29794 0.37170
  -3   1  -155367.62 1404.82   1 0.12266-0.40214 0.96507-0.90188-0.23149 0.15773
   3  -1   149039.32  906.45   1 0.37687-0.09743 0.92530-0.98846-0.04221 0.11595
   3   1   2158910.9 2380.33   1-0.14397 0.42925-0.49802 0.56123 0.85512-0.70764
   3  -1   2157550.8 2413.15   1-0.33986 0.62513-0.43165 0.36844 0.83556-0.68807
  -3  -1  -2145122.0 2155.48   1-0.51480 0.22953-0.35000 0.28679 0.78260-0.93008
  -3   1  -2154791.7 2340.69   1-0.28371-0.00161 0.80018-0.73697 0.52839-0.67592
  -3   1  -2159374.6 2483.99   1 0.13968-0.42500 0.96547-0.90229-0.21987 0.07236
   3   1   393151.80 2293.36   1-0.30652 0.59764-0.44466 0.50787 0.84161-0.62038
   3  -1   398452.78 2450.13   1-0.45715 0.74827-0.37957 0.31636 0.80432-0.58309
  -3  -1  -384225.84 2052.90   1-0.69933 0.40818-0.23201 0.16882 0.67608-0.89715
  -3  -1  -399665.99 2474.07   1-0.68409 0.39301 0.59734-0.66052 0.41856-0.63971
  -3   1  -396019.94 2352.10   1-0.45441 0.16327 0.73854-0.67533 0.49805-0.71920
  -3  -1  -3102212.9 2565.90   1-0.13652-0.15472 0.90999-0.97318-0.39149 0.17021
   3   1   4 4804.78  359.51   1-0.42356 0.72053-0.39553 0.45874 0.81495-0.51998
   3  -1   4 4131.45  501.23   1-0.53762 0.83459-0.33747 0.27426 0.77270-0.47773
  -3  -1  -4 3876.51  388.54   1-0.77608 0.47910 0.51200-0.57519 0.36815-0.66302
  -3   1  -4 3796.70  245.93   1-0.60969 0.31264 0.65237-0.58917 0.45020-0.74507
  -3  -1  -4 5429.79  447.36   1-0.11828-0.17881 0.91692-0.98010-0.38112 0.08609
  -3   1  -4 3799.32  566.00   1 0.12914-0.42616 0.96527-0.90208-0.22709-0.06793
   3   1   549138.26 1620.58   1-0.50221 0.80503-0.35671 0.41992 0.78774-0.41903
   3  -1   537589.26 1346.76   1-0.59015 0.89307-0.30661 0.24343 0.74679-0.37835
  -3  -1  -535054.85 1579.23   1-0.85108 0.54851 0.42180-0.48496 0.31261-0.68113
  -3   1  -550294.51 1613.12   1-0.74146 0.43858 0.54682-0.48363 0.38886-0.75745
  -3  -1  -536852.68 1322.35   1-0.11351-0.18943 0.91866-0.98184-0.37838 0.00959
  -3   1  -547692.44 1680.47   1 0.11053-0.41340 0.96453-0.90135-0.23970-0.12908
   3  -1   646142.96 1755.11   1-0.62329 0.93210-0.28562 0.22243 0.72795-0.28582
   3   1   642442.30 1538.47   1-0.55246 0.86112-0.32906 0.39227 0.76583-0.32338
  -3  -1  -645231.29 1609.46   1-0.91004 0.60160 0.32688-0.39004 0.25487-0.69709
  -3   1  -641476.03 1529.99   1-0.84503 0.53658 0.43014-0.36698 0.31764-0.75986
  -3  -1  -646601.64 1741.89   1-0.11887-0.18992 0.91671-0.97989-0.38146-0.06109
  -3   1  -645767.88 1758.45   1 0.08606-0.39479 0.96282-0.89964-0.25604-0.18650
   3   1   711792.06 1318.55   1-0.58210 0.89679-0.31153 0.37471 0.75107-0.23525
   3  -1   710476.78 1242.70   1-0.64229 0.95699-0.27297 0.20979 0.71619-0.20037
  -3  -1  -711035.83 1867.49   1-0.95328 0.63887 0.23048-0.29362 0.19524-0.71107
  -3   1  -710557.01 1441.90   1-0.92150 0.60719 0.30445-0.24129 0.24110-0.75702
  -3  -1  -711495.08 1283.24   1-0.13208-0.18256 0.91172-0.97491-0.38898-0.12733
  -3   1  -711458.78 1679.39   1 0.05697-0.37155 0.95972-0.89653-0.27512-0.24118
   3   1   829608.33 1899.56   1-0.59767 0.91825-0.30196 0.36515 0.74269-0.15318
   3  -1   826842.23 1786.40   1-0.65088 0.97146-0.26711 0.20392 0.71063-0.12112
  -3   1  -828995.08 2404.14   1-0.97108 0.65077 0.17596-0.11282 0.16132-0.75083
  -3  -1  -825002.28 1988.76   1-0.98203 0.66172 0.13264-0.19578 0.13421-0.72373
  -3  -1  -828430.65 1926.37   1-0.15156-0.16892 0.90392-0.96711-0.39992-0.19014
  -3   1  -833371.84 3145.68   1 0.02305-0.34354 0.95499-0.89181-0.29571-0.29435
   3   1   927759.79 2330.15   1-0.60248 0.92895-0.29895 0.36214 0.74002-0.07682
   3  -1   923637.10 1991.47   1-0.65147 0.97794-0.26670 0.20351 0.71024-0.04704
  -3  -1  -919701.41 1633.88   1-0.99693 0.67017 0.02823-0.09144 0.07289-0.73654
  -3   1  -926024.23 2084.60   1-0.99618 0.66941 0.03761 0.02559 0.07879-0.74244
  -3   1  -926618.99 3080.76   1-0.01316-0.31317 0.94784-0.88466-0.31844-0.34538
   3   1  10 5895.45 1348.97   1-0.59887 0.93122-0.30121 0.36440 0.74203-0.00514
   3  -1  10 3027.63  782.44   1-0.64561 0.97796-0.27072 0.20754 0.71406 0.02281
  -3  -1 -10 3328.90  755.70   1-0.99739 0.66470-0.07151 0.00830 0.00966-0.74706
  -3   1 -10 3721.54 1030.47   1-0.05232-0.27986 0.93810-0.87491-0.34237-0.39521
   3   1  11 9473.54  936.49   1-0.58829 0.92652-0.30775 0.37094 0.74779 0.06278
   3  -1  1112375.93 1225.26   1-0.63424 0.97247-0.27839 0.21520 0.72127 0.08930
  -3   1 -11 7160.57 1761.62   1-0.09424-0.24379 0.92534-0.86215-0.36722-0.44412
   3  -2 -12 6539.89 1798.60   1 0.96435-0.76160-0.11788-0.00853-0.23690-0.64798
   3   2 -12 8068.72 1921.63   1 0.95820-0.75543-0.09666 0.22307-0.26925-0.61607
   3  -2 -11 1476.46  312.93   1 0.97225-0.76357-0.16427 0.03786-0.16654-0.64460
   3   2 -11 2869.82  783.60   1 0.96770-0.75902-0.13315 0.25956-0.21406-0.59708
   3   2 -1016623.00 2482.93   1 0.97279-0.75818-0.17048 0.29690-0.15688-0.58052
   3  -2 -1013148.58 2356.79   1 0.97304-0.75843-0.21178 0.08537-0.09127-0.64612
  -3   2  1013628.27 1163.16   1 0.52759-0.74285 0.72637-0.59985 0.44048 0.29721
   3   2  -928081.73 2809.53   1 0.97324-0.75271-0.20837 0.33478-0.09679-0.56686
   3  -2  -935111.77 3338.45   1 0.96527-0.74480-0.26103 0.13463-0.01015-0.65355
  -3   2   923166.20 1413.54   1 0.55505-0.77614 0.71206-0.58554 0.42998 0.23393
   3   2  -812256.69 1639.16   1 0.96843-0.74197-0.24704 0.37345-0.03315-0.55677
   3  -2  -811213.91 1403.63   1 0.94693-0.72056-0.31176 0.18536 0.07817-0.66814
  -3  -2   813598.28 1169.81   1 0.01890-0.24563 0.84160-0.96805 0.53976 0.05036
  -3   2   812889.39 1222.93   1 0.57370-0.80063 0.70171-0.57519 0.42245 0.16770
   3   2  -811692.04 1192.39   1 0.43840-0.21148 0.89873-0.77241 0.00892-0.59887
   3   2  -753065.09 2109.39   1 0.95727-0.72500-0.28708 0.41349 0.03458-0.55080
   3  -2  -749644.15 2125.49   1 0.91483-0.68256-0.36397 0.23757 0.17490-0.69112
  -3  -2   754749.93 2045.07   1 0.01709-0.24968 0.84159-0.96804 0.53984-0.02347
  -3   2   752305.63 2095.46   1 0.58321-0.81599 0.69622-0.56971 0.41847 0.09790
   3   2  -750119.48 1835.85   1 0.57048-0.33763 0.81099-0.68465 0.12974-0.64594
  -3  -2   742782.20 1575.36   1 0.75560-0.98834-0.24995 0.12353 0.60546-0.08895
   3  -2  -6144075.1 4817.00   1 0.86471-0.62649-0.41630 0.28993 0.28101-0.72349
  -3  -2   6134660.2 4460.71   1-0.00598-0.23248 0.84118-0.96763 0.54070-0.09810
  -3   2   6154451.8 5199.63   1 0.58265-0.82126 0.69655-0.57004 0.41871 0.02390
   3   2  -6128393.7 4237.50   1 0.81898-0.58017 0.50024-0.37375 0.28110-0.72366
   3   2  -6147224.6 4839.14   1 0.69491-0.45625 0.66949-0.54311 0.26242-0.70488
  -3  -2   6131113.0 4315.78   1 0.72994-0.96856-0.31238 0.18596 0.60794-0.16521
   3   2  -517225.62 1882.48   1 0.90946-0.66539-0.37080 0.49721 0.18806-0.55680
   3  -2  -518116.40  760.75   1 0.78969-0.54560-0.46822 0.34185 0.39641-0.76514
  -3  -2   515029.76  601.50   1-0.05006-0.19426 0.83917-0.96562 0.54155-0.17272
  -3   2   514852.08  757.59   1 0.57038-0.81483 0.70358-0.57707 0.42381-0.05496
   3   2  -512254.13  516.55   1 0.67130-0.42676 0.63821-0.51172 0.37687-0.74566
   3   2  -512814.67  480.33   1 0.79177-0.54735 0.46432-0.33798 0.39686-0.76561
  -3  -2   514763.10  561.98   1 0.68826-0.93274-0.39636 0.26998 0.60761-0.23894
   3   2  -433159.96 1043.55   1 0.86704-0.61708-0.41427 0.54064 0.27677-0.57176
   3  -2  -439181.66 1097.28   1 0.68233-0.43228-0.51540 0.38898 0.51843-0.81352
  -3  -2   439723.05 1070.79   1-0.11428-0.13591 0.83328-0.95973 0.54090-0.24583
   3   2  -430144.13  856.74   1 0.48985-0.23956 0.74436-0.61785 0.45383-0.74891
  -3   2   433411.53 1021.44   1 0.54391-0.79420 0.71799-0.59148 0.43432-0.13924
   3   2  -433928.33  907.41   1 0.83477-0.58447 0.19987-0.07351 0.51303-0.80807
  -3  -2   440551.97 1057.99   1 0.62644-0.87674-0.49954 0.37316 0.59835-0.30341
   3   2  -371801.72 1826.08   1 0.80555-0.54971-0.45896 0.58533 0.37474-0.59598
   3  -2  -372794.22 1841.66   1 0.53581-0.27961-0.55069 0.42424 0.64002-0.86129
   3   2  -374394.77 1834.74   1 0.29189-0.03578 0.81122-0.68471 0.50666-0.72792
  -3   2   379341.54 2040.47   1 0.49973-0.75586 0.73983-0.61332 0.45045-0.22914
   3  -2  -372802.10 1703.14   1 0.81937-0.56317 0.35106-0.47742 0.45318-0.67446
   3   2  -382440.56 2002.71   1 0.80518-0.54906-0.08825 0.21462 0.58642-0.80775
  -3  -2   374619.84 1829.41   1 0.54423-0.80031-0.60894 0.48258 0.57705-0.35581
   3   2  -2 8704.55  347.59   1 0.71749-0.45568-0.50245 0.62886 0.48243-0.62997
   3  -2  -212728.65  504.44   1 0.35003-0.08805-0.56600 0.43955 0.74640-0.89389
  -3  -2   212441.83  433.81   1-0.29119 0.02932 0.79812-0.92455 0.52744-0.37992
   3   2  -2 8625.22  342.99   1 0.09885 0.16308 0.83938-0.71293 0.53446-0.68199
  -3   2   2 9143.56  403.24   1 0.43341-0.69537 0.76791-0.64140 0.47165-0.32411
  -3   2   211341.52  316.48   1 0.13853-0.40045 0.96546-0.83909-0.22066 0.36818
   3  -2  -211962.62  285.92   1 0.67446-0.41249 0.69862-0.82500 0.23879-0.38628
   3   2  -2 9263.02  351.06   1 0.71340-0.45127-0.34823 0.47465 0.60810-0.75567
  -3  -2   212454.05  383.76   1 0.44594-0.70786-0.71199 0.58563 0.54240-0.39491
  -3  -2   1  332.93  180.31   1 0.30427-0.57209-0.56587 0.43942 0.76628-0.69254
  -3   2   1  175.88  186.87   1-0.17009-0.09763-0.49052 0.61694 0.85466-0.78092
  -3  -2   1  196.88  197.21   1-0.39378 0.12625 0.76382-0.89023 0.51137-0.43765
   3   2  -1  421.39  168.96   1-0.07235 0.34016 0.83752-0.71107 0.54158-0.61535
  -3   2   1  446.35  100.98   1 0.23760-0.50537 0.95965-0.83328-0.15036 0.22412
   3  -2  -1   85.23  116.12   1 0.58932-0.32152 0.79417-0.92051 0.14825-0.22199
   3   2  -1  314.25  250.21   1 0.59413-0.32636-0.54567 0.67205 0.59096-0.66469
   3  -2   0104277.1 1637.59   1 0.50662-0.23297 0.73660-0.86311 0.44805-0.44805
   3   2   154104.94  944.81   1 0.22230 0.05718-0.56225 0.68870 0.79652-0.72277
  -3  -2  -161710.42 1003.27   1-0.18332-0.09610-0.48657 0.36014 0.85418-0.92793
   3  -2   165312.42 1140.92   1-0.25547 0.53490-0.46317 0.33674 0.84864-0.77490
  -3   2  -155384.38 1012.71   1 0.06055-0.34009 0.84112-0.71467 0.53743-0.61120
   3  -2   162882.67 1082.21   1 0.40392-0.12444 0.77873-0.90524 0.48001-0.40624
  -3   2  -154270.00 1029.24   1 0.28296-0.56240 0.95211-0.82579-0.11577 0.04203
   3  -2   161037.99 1060.82   1 0.53320-0.25374 0.84071-0.96705 0.09429-0.02055
   3   2   2 9332.46  391.04   1 0.00821 0.27689-0.53390 0.66031 0.84550-0.69807
  -3  -2  -2 8680.10  314.36   1-0.45635 0.17108-0.37996 0.25354 0.80459-0.95207
   3  -2   2 9303.27  443.11   1-0.39699 0.68227-0.40753 0.28110 0.82237-0.67489
  -3   2  -2 9770.34  430.56   1-0.11946-0.16594 0.83265-0.70620 0.54075-0.68828
   3  -2   2 8384.90  342.24   1 0.30655-0.02114 0.80767-0.93418 0.50367-0.35616
  -3   2  -2 9945.20 1244.42   1 0.27604-0.56132 0.95349-0.82717-0.12100-0.02648
   3   2   3115583.2 2802.15   1-0.18045 0.47157-0.48744 0.61386 0.85430-0.63307
   3  -2   3104683.5 2624.05   1-0.49844 0.78956-0.35868 0.23226 0.78923-0.56800
  -3  -2  -399522.07 2399.36   1-0.67534 0.38418-0.24983 0.12345 0.69389-0.91496
  -3  -2  -3107673.3 2668.45   1-0.76722 0.47614 0.52127-0.64765 0.37368-0.59484
  -3   2  -3114542.7 2780.19   1-0.31185 0.02065 0.79216-0.66573 0.52461-0.74589
   3  -2   395055.88 2319.83   1 0.22125 0.07001 0.82549-0.95200 0.51923-0.29796
  -3   2  -3113122.7 2881.51   1 0.25944-0.55055 0.95649-0.83017-0.13344-0.08778
   3   2   4251571.6 7426.27   1-0.32461 0.62158-0.43769 0.56412 0.83848-0.54350
   3  -2   4245731.5 7313.98   1-0.56771 0.86468-0.32018 0.19375 0.75840-0.46343
  -3  -2  -4250416.3 7446.66   1-0.83463 0.53792 0.44398-0.57030 0.32598-0.62079
  -3   2  -4261304.8 7711.11   1-0.49946 0.20241 0.71693-0.59052 0.48635-0.78122
   3  -2   4225033.2 6653.06   1 0.15256 0.14456 0.83500-0.96151 0.52866-0.23364
  -3   2  -4237579.5 7101.29   1 0.23654-0.53356 0.95979-0.83342-0.15114-0.14388
   3   2   556705.43 1976.18   1-0.42469 0.72750-0.39500 0.52143 0.81461-0.44590
   3  -2   550282.20 1883.47   1-0.61291 0.91584-0.29233 0.16596 0.73407-0.36563
  -3  -2  -551871.98 1898.67   1-0.89009 0.58752 0.36230-0.48861 0.27651-0.64503
  -3   2  -557497.58 1977.74   1-0.66633 0.36345 0.61144-0.48507 0.42677-0.79536
  -3   2  -553679.02 2511.71   1 0.20836-0.51124 0.96287-0.83651-0.17160-0.19718
   3   2   630550.30 1216.00   1-0.48996 0.79863-0.36309 0.48952 0.79252-0.35007
   3  -2   635651.55 1388.23   1-0.64140 0.95021-0.27358 0.14720 0.71676-0.27463
  -3  -2  -641229.00 1518.35   1-0.93360 0.62509 0.27875-0.40504 0.22509-0.66722
  -3   2  -633941.32 1220.46   1-0.80109 0.49265 0.48509-0.35878 0.35060-0.79282
  -3   2  -633286.83 1328.56   1 0.17627-0.48500 0.96494-0.83858-0.19443-0.24810
   3   2   726725.12 1453.34   1-0.53008 0.84460-0.34166 0.46809 0.77605-0.25986
   3  -2   735896.92 2021.18   1-0.65752 0.97222-0.26250 0.13612 0.70622-0.19040
  -3  -2  -734152.62 1839.24   1-0.96588 0.65147 0.19340-0.31968 0.17219-0.68802
  -3   2  -725638.49 1346.52   1-0.90193 0.58762 0.34178-0.21547 0.26399-0.77991
  -3   2  -726089.99 1486.31   1 0.14093-0.45551 0.96548-0.83912-0.21901-0.29728
   3   2   8 8692.71  704.85   1-0.55223 0.87260-0.32919 0.45561 0.76594-0.17600
   3  -2   811561.47 1056.87   1-0.66441 0.98499-0.25766 0.13128 0.70154-0.11203
  -3  -2  -811069.56 1610.33   1-0.98720 0.66689 0.10707-0.23335 0.11815-0.70766
  -3   2  -8 7339.55  786.59   1-0.96656 0.64625 0.19122-0.06493 0.17083-0.76035
  -3   2  -8 7946.47 1098.78   1 0.10277-0.42320 0.96408-0.83771-0.24491-0.34514
   3   2   9 6619.40  916.39   1-0.56121 0.88742-0.32399 0.45042 0.76161-0.09794
   3  -2   9 5908.19  950.77   1-0.66409 0.99056-0.25788 0.13150 0.70176-0.03856
  -3  -2  -9 4005.61  767.24   1-0.99782 0.67106 0.01449-0.14090 0.06423-0.72788
  -3   2  -9 5166.48  942.72   1 0.06205-0.38834 0.96034-0.83398-0.27181-0.39200
   3   2  1016351.21 1330.43   1-0.56007 0.89213-0.32466 0.45108 0.76217-0.02475
   3  -2  1013504.10 1249.79   1-0.65789 0.99024-0.26224 0.13587 0.70597 0.03090
  -3  -2 -1014213.38 1170.54   1-0.99722 0.66453-0.07407-0.05233 0.00803-0.74542
  -3   2 -1015176.33 1893.39   1 0.01786-0.35005 0.95408-0.82771-0.29900-0.43858
   3  -2  11 6694.58  773.58   1-0.64661 0.98484-0.27004 0.14366 0.71342 0.09715
  -3   2 -11 7181.79 1814.27   1-0.02758-0.31046 0.94450-0.81813-0.32733-0.48401
   3   3 -1113881.93 3237.20   1 0.96476-0.75609-0.11960 0.30922-0.23434-0.57680
  -3   3  1119688.24 2364.48   1 0.55289-0.76231 0.71322-0.52345 0.43083 0.38062
   3   3 -10 3485.43  977.60   1 0.97117-0.75656-0.15461 0.34423-0.18143-0.55597
   3  -3 -10 3524.41  886.51   1 0.97280-0.75820-0.21511 0.02549-0.08588-0.65152
  -3   3  10 6140.44 1393.75   1 0.58637-0.80163 0.69437-0.50460 0.41713 0.32055
   3   3  -910656.80 1741.63   1 0.97363-0.75310-0.18994 0.37956-0.12629-0.53736
   3  -3  -911400.07 1670.28   1 0.96353-0.74306-0.26757 0.07796 0.00094-0.66465
  -3   3   9 9954.80  818.90   1 0.61180-0.83313 0.67895-0.48922 0.40584 0.25797
   3   3  -9 8178.41  834.41   1 0.43533-0.21425 0.90024-0.71076 0.00631-0.67000
   3   3  -841450.06 2376.51   1 0.97176-0.74531-0.22578 0.41540-0.06843-0.52148
   3  -3  -835605.01 2032.02   1 0.94200-0.71563-0.32160 0.13200 0.09591-0.68589
  -3  -3   832037.84 1758.48   1-0.25183 0.02515 0.80836-0.99800 0.53209 0.05798
  -3   3   840321.54 2318.98   1 0.63019-0.85733 0.66706-0.47732 0.39733 0.19272
   3   3  -838882.00 2151.11   1 0.54804-0.32103 0.82941-0.63990 0.10824-0.69818
   3   3  -725147.16 1414.10   1 0.96487-0.73260-0.26260 0.45220-0.00750-0.50872
   3  -3  -726615.97 1471.61   1 0.90458-0.67224-0.37639 0.18684 0.20013-0.71636
  -3  -3   724197.23 1265.19   1-0.24429 0.01175 0.81015-0.99979 0.53288-0.01656
  -3   3   728574.53 1683.85   1 0.64089-0.87383 0.65986-0.47012 0.39221 0.12408
   3   3  -722185.32 1146.11   1 0.90156-0.66852 0.38265-0.19292 0.20189-0.71822
   3   3  -726443.01 1393.96   1 0.65376-0.42092 0.72526-0.53570 0.21581-0.73201
   3   3  -6 2574.09  353.68   1 0.95208-0.71391-0.30033 0.48993 0.05781-0.50029
   3  -3  -6 2904.32  342.58   1 0.84543-0.60722-0.43186 0.24231 0.31419-0.75667
  -3  -3   6 2971.47  256.76   1-0.26071 0.02230 0.80618-0.99582 0.53113-0.08856
  -3   3   6 2068.84  458.41   1 0.64319-0.88193 0.65828-0.46855 0.39109 0.05145
   3   3  -6 2325.39  192.37   1 0.75926-0.52053 0.56381-0.37408 0.32499-0.76753
   3   3  -6 2723.76  259.68   1 0.74407-0.50552 0.58373-0.39422 0.32497-0.76748
   3   3  -536999.07 1615.50   1 0.93185-0.68778-0.33933 0.52894 0.12843-0.49716
   3  -3  -549837.42 1609.02   1 0.75769-0.51351-0.48485 0.29522 0.43683-0.80569
  -3  -3   549136.74 1565.30   1-0.29732 0.05305 0.79640-0.98604 0.52663-0.15782
   3   3  -535335.06 1143.75   1 0.56788-0.32343 0.70499-0.51522 0.42483-0.79368
  -3   3   541066.38 1471.52   1 0.63584-0.88038 0.66329-0.47355 0.39465-0.02586
   3   3  -539033.79 1255.66   1 0.80882-0.56440 0.40239-0.21288 0.42882-0.79757
   3   3  -452895.58 1461.96   1 0.90194-0.65198-0.37945 0.56901 0.20615-0.50113
  -3  -3   466269.10 1671.46   1-0.35050 0.10036 0.77987-0.96950 0.51860-0.22356
   3   3  -449004.76 1255.91   1 0.34985-0.09960 0.79593-0.60617 0.49404-0.78907
  -3   3   451575.44 1487.06   1 0.61683-0.86717 0.67576-0.48602 0.40355-0.10852
   3   3  -448855.75 1280.69   1 0.83498-0.58468 0.19056-0.00102 0.51621-0.81125
  -3  -3   464177.64 1617.91   1 0.66910-0.91941-0.43081 0.24124 0.60555-0.31061
   3  -3  -318211.06  618.69   1 0.46956-0.21336-0.55945 0.36977 0.68302-0.90428
  -3  -3   319491.56  645.33   1-0.41541 0.15969 0.75528-0.94489 0.50692-0.28577
   3   3  -318106.52  566.52   1 0.13245 0.12365 0.83700-0.64723 0.53092-0.75219
  -3   3   320401.83  750.55   1 0.58335-0.83948 0.69614-0.50637 0.41842-0.19711
  -3   3   318181.85  571.13   1 0.33656-0.59266 0.93871-0.74923-0.07440 0.29564
   3  -3  -318594.81  490.08   1 0.83197-0.57586 0.08738-0.27694 0.54788-0.76920
   3   3  -319977.72  644.13   1 0.81650-0.56039-0.03321 0.22277 0.57637-0.79770
  -3  -3   318305.17  597.96   1 0.60863-0.86475-0.52553 0.33596 0.59446-0.37325
   3  -3  -2294911.9 6905.22   1 0.27094-0.00896-0.56491 0.37523 0.77939-0.92688
  -3  -3   2312352.7 7328.74   1-0.48880 0.22718 0.72227-0.91188 0.48927-0.34183
   3   3  -2297735.5 6957.24   1-0.06087 0.32282 0.83842-0.64875 0.54160-0.68913
  -3   3   2313042.7 7370.67   1 0.53103-0.79299 0.72464-0.53487 0.43920-0.29166
  -3   3   2330192.3 7697.41   1 0.41029-0.67222 0.91183-0.72234-0.01474 0.16223
   3  -3  -2296632.9 6884.65   1 0.79535-0.53331 0.45264-0.64215 0.40314-0.55064
   3   3  -2347402.2 8108.76   1 0.75802-0.49590-0.24353 0.43316 0.60505-0.75262
  -3  -3   2285765.4 6680.91   1 0.53241-0.79434-0.62273 0.43319 0.57335-0.42585
   3   3  -1594724.117387.78   1 0.70636-0.43867-0.50678 0.69640 0.49419-0.56796
  -3  -3   1511883.911874.29   1 0.38924-0.65705-0.56496 0.37528 0.72753-0.65379
   3  -3  -1566880.816590.04   1 0.05746 0.21025-0.54274 0.35311 0.83793-0.91164
  -3   3   1575549.016825.33   1 0.42845-0.69621 0.90356-0.71408 0.00048 0.07326
   3  -3  -1538011.515716.11   1 0.72899-0.46120 0.61314-0.80271 0.30433-0.37807
   3   3  -1607423.817765.27   1 0.67534-0.40757-0.41986 0.60943 0.60631-0.68004
   3   3   0196957.0 2879.61   1 0.57885-0.30529-0.54276 0.73244 0.60854-0.60854
  -3  -3   0187805.7 2736.66   1 0.18507-0.45872-0.55924 0.36956 0.80807-0.80807
   3  -3   0190986.1 2858.27   1-0.14290 0.41648-0.49832 0.30868 0.85513-0.85513
  -3  -3   0192630.1 2897.02   1-0.64004 0.36666 0.63114-0.82071 0.43816-0.43816
  -3   3   0196437.5 2927.30   1 0.42460-0.69820 0.90537-0.71589-0.00276 0.00276
   3  -3   0178414.2 2635.60   1 0.68063-0.40702 0.69015-0.87971 0.24582-0.24582
   3   3   121030.56  634.45   1 0.40738-0.12802-0.56431 0.75399 0.71804-0.64428
  -3  -3  -128710.48  766.64   1-0.09175-0.18756-0.51177 0.32214 0.85420-0.92792
  -3   3  -121935.91  747.84   1 0.21023-0.48978 0.82730-0.63753 0.52092-0.59468
   3   3   120258.99  688.97   1 0.50655-0.22709-0.65148 0.84102 0.56476-0.49102
   3   3   2159566.4 3779.06   1 0.20137 0.08395-0.56066 0.75034 0.80318-0.65569
   3  -3   2162275.9 3919.95   1-0.43508 0.72036-0.39015 0.20051 0.81146-0.66398
  -3  -3  -2149053.4 3515.11   1-0.39823 0.11296-0.40698 0.21734 0.82205-0.96953
  -3  -3  -2168272.1 4074.20   1-0.77524 0.49006 0.51290-0.70246 0.36868-0.51612
  -3   3  -2160583.3 3836.17   1 0.03686-0.32228 0.84157-0.65190 0.53887-0.68641
   3  -3   2153128.4 3661.19   1 0.50267-0.21735 0.73846-0.92823 0.44943-0.30189
   3   3   2169423.0 4107.44   1 0.44064-0.15533-0.71685 0.90639 0.54031-0.39282
   3   3   319545.44  600.23   1-0.00678 0.29767-0.53094 0.72056 0.84738-0.62623
   3  -3   322655.97  847.54   1-0.52466 0.81578-0.34465 0.15501 0.77842-0.55719
  -3  -3  -323464.21  673.43   1-0.65656 0.36541-0.26317 0.07360 0.70686-0.92793
  -3  -3  -323001.25  986.99   1-0.83202 0.54118 0.44737-0.63684 0.32801-0.54912
  -3   3  -318960.64  591.19   1-0.16314-0.12805 0.82619-0.63655 0.53924-0.76052
   3  -3   324079.00  726.15   1 0.43353-0.14237 0.76786-0.95763 0.47162-0.25031
  -3   3  -321100.91 2080.89   1 0.35852-0.64963 0.93177-0.74229-0.05698-0.16424
   3   3   322277.03  808.20   1 0.39091-0.09976-0.75964 0.94918 0.51973-0.29849
   3   3   415576.37  621.75   1-0.18199 0.47897-0.48697 0.67661 0.85424-0.55927
   3  -3   412925.41  722.71   1-0.58563 0.88267-0.30938 0.11982 0.74920-0.45445
  -3  -3  -411008.78  457.69   1-0.82632 0.52935-0.11831-0.07127 0.55062-0.84540
  -3  -3  -412349.39 1533.75   1-0.88065 0.58394 0.37775-0.56722 0.28592-0.58073
  -3   3  -415128.33  587.37   1-0.37394 0.07687 0.77167-0.58203 0.51448-0.80952
   3  -3   411291.27  467.12   1 0.37459-0.07746 0.78837-0.97814 0.48800-0.19297
  -3   3  -412159.20 1705.98   1 0.32684-0.62378 0.94151-0.75202-0.08203-0.21294
   3   3   559742.12 2062.11   1-0.31119 0.61401-0.44288 0.63251 0.84084-0.47212
   3  -3   561696.94 2271.70   1-0.62609 0.92902-0.28378 0.09422 0.72626-0.35782
  -3  -3  -562876.84 2226.25   1-0.92093 0.61835 0.30562-0.49509 0.24182-0.61034
  -3   3  -562138.18 2117.30   1-0.57585 0.27290 0.67412-0.48451 0.46254-0.83112
   3  -3   552580.70 1816.03   1 0.33054-0.02755 0.80140-0.99116 0.49848-0.12971
   3   3   615030.17  739.11   1-0.39857 0.70724-0.40683 0.59647 0.82196-0.37951
   3  -3   6 8802.49  723.46   1-0.65148 0.96029-0.26669 0.07713 0.71023-0.26810
  -3  -3  -6 9664.15 1194.38   1-0.95274 0.64423 0.23194-0.42136 0.19615-0.63828
   3  -3   6 7441.54  395.79   1 0.30395 0.00488 0.80831-0.99808 0.50421-0.06167
  -3   3  -614646.61 2152.53   1 0.25501-0.56374 0.95710-0.76755-0.13751-0.30503
   3   3   7 8606.02  975.06   1-0.45400 0.76851-0.38111 0.57074 0.80538-0.28918
   3  -3   7 7205.96  920.17   1-0.66579 0.98048-0.25668 0.06712 0.70059-0.18477
  -3  -3  -7 7900.05 1429.72   1-0.97635 0.66194 0.15647-0.34589 0.14914-0.66496
  -3   3  -7 6584.28  938.70   1-0.87982 0.56550 0.37907-0.18960 0.28672-0.80265
  -3   3  -7 9183.07 1427.95   1 0.21523-0.52981 0.96223-0.77268-0.16665-0.34964
   3   3   815058.36  922.24   1-0.48639 0.80675-0.36493 0.55457 0.79387-0.20394
   3  -3   813153.47 1734.95   1-0.67168 0.99226-0.25247 0.06290 0.69648-0.10697
  -3  -3  -8 9136.16 1530.42   1-0.99186 0.67102 0.07544-0.26506 0.10251-0.69243
  -3   3  -811414.84 1456.46   1-0.96418 0.64387 0.19879-0.00937 0.17555-0.76506
  -3   3  -814806.54 1674.65   1 0.17326-0.49369 0.96506-0.77551-0.19655-0.39350
   3   3   926266.81 2130.94   1-0.50203 0.82824-0.35680 0.54644 0.78781-0.12413
   3  -3   932696.92 2697.40   1-0.67094 0.99741-0.25300 0.06344 0.69700-0.03380
  -3  -3  -931215.46 2569.20   1-0.99858 0.67181-0.00301-0.18660 0.05317-0.71682
  -3   3  -929764.09 3842.37   1 0.12921-0.45549 0.96527-0.77572-0.22704-0.43677
   3  -3  10 6845.00  859.30   1-0.66470 0.99705-0.25745 0.06788 0.70134 0.03554
  -3  -3 -10 8615.03  800.62   1-0.99659 0.66390-0.08242-0.10719 0.00270-0.74009
  -3   3 -10 4816.89 1649.51   1 0.08312-0.41525 0.96256-0.77301-0.25798-0.47958
   3  -3  11 1669.34  604.32   1-0.65369 0.99192-0.26517 0.07560 0.70878 0.10179
  -3   3 -11 2700.68  902.67   1 0.03386-0.37190 0.95678-0.76722-0.28881-0.52253
   3   4 -11 1083.62  555.48   1 0.96057-0.75189-0.10464 0.35746-0.25759-0.55396
   3  -4 -11 1971.49  488.11   1 0.97192-0.76324-0.16100-0.09181-0.17159-0.63955
  -3   4  11  666.58  361.87   1 0.59793-0.80735 0.68746-0.43443 0.41215 0.39930
   3   4 -10 9545.12 1715.83   1 0.96841-0.75381-0.13692 0.38974-0.20838-0.52902
   3  -4 -1013822.90 1663.72   1 0.97283-0.75823-0.21470-0.03811-0.08653-0.65087
  -3   4  1015601.12 1319.86   1 0.62850-0.84403 0.66818-0.41519 0.39813 0.33943
   3   4  -928894.96 3664.50   1 0.97273-0.75219-0.16973 0.42256-0.15805-0.50560
   3  -4  -926496.03 2183.63   1 0.96265-0.74218-0.27067 0.01787 0.00624-0.66996
  -3   4   932102.41 2687.76   1 0.65280-0.87413 0.65160-0.39861 0.38634 0.27747
   3   4  -928766.02 2308.35   1 0.51778-0.29659 0.85175-0.59908 0.08004-0.74372
   3   4  -8 9549.56 1284.39   1 0.97349-0.74703-0.20277 0.45560-0.10580-0.48411
   3  -4  -8 8789.68 1067.99   1 0.93835-0.71198-0.32832 0.07552 0.10815-0.69812
  -3   4   810666.20  895.32   1 0.67058-0.89772 0.63874-0.38576 0.37725 0.21280
   3   4  -810681.77  786.63   1 0.61418-0.38716 0.76989-0.51721 0.17333-0.76327
   3   4  -731539.05 2708.93   1 0.97034-0.73795-0.23624 0.48906-0.05117-0.46500
   3  -4  -727789.50 1494.61   1 0.89566-0.66332-0.38647 0.13373 0.22006-0.73628
  -3  -4   727962.79 1425.63   1-0.52910 0.29700 0.70129-0.95410 0.47774 0.03827
  -3   4   734754.33 2048.05   1 0.68170-0.91463 0.63037-0.37739 0.37135 0.14494
   3   4  -730547.49 1616.74   1 0.69921-0.46637 0.66296-0.41021 0.26752-0.78372
   3   4  -642993.08 1614.76   1 0.96268-0.72451-0.27055 0.52336 0.00604-0.44852
   3  -4  -647034.08 1656.43   1 0.82785-0.58964-0.44456 0.19181 0.34207-0.78455
  -3  -4   645785.17 1561.84   1-0.52150 0.28350 0.70541-0.95822 0.48002-0.03772
   3   4  -637706.93 1285.09   1 0.68360-0.44486 0.62891-0.37593 0.37033-0.81287
  -3   4   643782.39 1716.95   1 0.68563-0.92437 0.62735-0.37436 0.36923 0.07331
   3   4  -642631.28 1504.55   1 0.76814-0.52959 0.53010-0.27742 0.35909-0.80160
   3   4  -518508.09 1456.97   1 0.94975-0.70568-0.30566 0.55847 0.06728-0.43602
   3  -4  -517562.78  746.55   1 0.72768-0.48350-0.49829 0.24546 0.47135-0.84021
  -3  -4   517886.24  734.04   1-0.53570 0.29180 0.69764-0.95046 0.47571-0.10713
   3   4  -515491.37  619.64   1 0.44760-0.20315 0.76235-0.50932 0.46740-0.83625
  -3   4   516975.95  943.88   1 0.68141-0.92596 0.63059-0.37761 0.37151-0.00272
   3   4  -518552.05  783.85   1 0.81553-0.57112 0.37186-0.11918 0.44341-0.81216
   3   4  -421621.60  857.20   1 0.93017-0.68020-0.34200 0.59481 0.13339-0.42838
   3  -4  -415212.66  625.80   1 0.58865-0.33823-0.54069 0.28779 0.60094-0.89597
  -3  -4   415196.42  582.74   1-0.56533 0.31552 0.68051-0.93333 0.46614-0.17127
   3   4  -420844.50  742.88   1 0.20470 0.04555 0.82817-0.57515 0.52175-0.81677
  -3   4   422731.26 1040.56   1 0.66746-0.91781 0.64104-0.38806 0.37887-0.08384
  -3   4   420014.08  642.23   1 0.53327-0.78360 0.84065-0.58798 0.09437 0.20059
   3   4  -420050.85  743.05   1 0.83486-0.58456 0.19611 0.05660 0.51432-0.80936
   3  -4  -415588.24  505.69   1 0.62554-0.37523-0.50089 0.24813 0.59816-0.89309
   3   4  -361105.81 1636.77   1 0.90185-0.64601-0.37956 0.63231 0.20637-0.42761
   3  -4  -373632.14 1853.84   1 0.41036-0.15416-0.56415 0.31125 0.71647-0.93773
   3   4  -354140.33 1374.49   1-0.01447 0.27054 0.84092-0.58802 0.54095-0.76225
  -3   4   362226.34 1756.36   1 0.64139-0.89754 0.65952-0.40653 0.39196-0.17069
  -3   4   360249.51 1485.39   1 0.56381-0.81996 0.81664-0.56396 0.12329 0.09792
   3   4  -359571.23 1568.47   1 0.82407-0.56796 0.01388 0.23886 0.56630-0.78763
   3  -4  -371139.51 1706.77   1 0.81730-0.56118-0.02879-0.22395 0.57548-0.79681
   3   4  -2 7304.24  360.49   1 0.86122-0.59950-0.41926 0.67200 0.28725-0.43474
   3  -4  -2 9753.88  408.59   1 0.20467 0.05730-0.56093 0.30802 0.80216-0.94965
  -3  -4   210419.57  462.85   1-0.65178 0.39019 0.62251-0.87526 0.43318-0.28574
  -3   4   2 7972.70  497.12   1 0.59982-0.86179 0.68631-0.43328 0.41132-0.26378
  -3   4   2 7601.08  361.22   1 0.56293-0.82491 0.81738-0.56470 0.12244 0.02503
   3  -4  -2 8344.61  325.84   1 0.83030-0.56819 0.27180-0.52451 0.48653-0.63405
   3   4  -2 7850.26  435.31   1 0.78574-0.52362-0.16058 0.41342 0.59734-0.74491
   3   4  -1 7676.87  414.15   1 0.80275-0.53516-0.46065 0.71339 0.37865-0.45240
  -3  -4   1 9924.55  383.83   1 0.45639-0.72417-0.56074 0.30784 0.69084-0.61709
   3  -4  -110261.68  462.19   1-0.00507 0.27280-0.53128 0.27844 0.84717-0.92089
  -3  -4   110402.84  490.74   1-0.70122 0.43373 0.58308-0.83584 0.41022-0.33651
  -3   4   1 9117.83  576.65   1 0.53797-0.80577 0.72109-0.46806 0.43659-0.36282
  -3   4   1 8041.85  389.41   1 0.54875-0.81656 0.82885-0.57617 0.10891-0.03517
   3  -4  -1 8841.02  345.34   1 0.79692-0.52901 0.44733-0.70001 0.40595-0.47970
   3   4  -1 8765.15  484.08   1 0.72853-0.46053-0.31556 0.56840 0.60799-0.68178
   3   4   0101284.0 2450.83   1 0.71785-0.44430-0.50230 0.75513 0.48204-0.48204
  -3  -4   079519.12 1941.47   1 0.26830-0.54195-0.56480 0.31190 0.78038-0.78038
   3  -4   080079.67 2016.14   1-0.19326 0.46684-0.48353 0.23068 0.85372-0.85372
  -3  -4   079031.32 2035.44   1-0.75076 0.47737 0.53782-0.79057 0.38352-0.38352
  -3   4   0102329.4 2534.13   1 0.45016-0.72380 0.76132-0.50829 0.46662-0.46662
  -3   4   0106476.0 2623.87   1 0.52701-0.80064 0.84523-0.59255 0.08855-0.08855
   3   4   0102931.2 2562.59   1 0.66231-0.38872-0.44244 0.69520 0.60463-0.60463
   3   4   191752.68 2218.26   1 0.59476-0.31541-0.53934 0.79224 0.59612-0.52236
  -3  -4  -190160.32 2170.46   1-0.00686-0.27244-0.53092 0.27808 0.84739-0.92110
  -3  -4  -198951.98 2496.23   1-0.79848 0.51939 0.48809-0.74072 0.35238-0.42609
  -3   4  -186748.61 2180.34   1 0.32993-0.60948 0.80157-0.54855 0.49862-0.57238
  -3   4  -187364.35 2222.55   1 0.50018-0.77964 0.86354-0.61086 0.06404-0.13778
   3   4   194228.83 2400.15   1 0.59730-0.31789-0.54134 0.79409 0.59175-0.51802
   3   4   213294.90  438.44   1 0.42609-0.14095-0.56317 0.81607 0.70801-0.56050
  -3  -4  -211200.14  369.15   1-0.34300 0.05773-0.43038 0.17753 0.83493-0.98241
  -3  -4  -2 9623.20 1145.34   1-0.84243 0.55747 0.43364-0.68627 0.31975-0.46716
  -3   4  -213083.10  524.28   1 0.17320-0.45861 0.83258-0.57956 0.52611-0.67362
  -3   4  -213322.66  574.90   1 0.46957-0.75486 0.88212-0.62944 0.03683-0.18432
   3   4   213042.29  604.42   1 0.53948-0.25417-0.61453 0.86725 0.57558-0.42809
   3   4   329201.81  946.14   1 0.22277 0.06838-0.56228 0.81519 0.79636-0.57513
   3  -4   334614.41 1259.79   1-0.53940 0.83052-0.33648 0.08363 0.77189-0.55067
  -3  -4  -332279.79 1022.61   1-0.64644 0.35529-0.27015 0.01740 0.71352-0.93459
  -3   4  -327024.14  938.76   1-0.02067-0.27060 0.84069-0.58779 0.54110-0.76240
   3  -4   329753.94 1008.71   1 0.61966-0.32869 0.67394-0.92693 0.40225-0.18098
  -3   4  -328020.52 1256.49   1 0.43626-0.72736 0.89979-0.64714 0.00710-0.22833
   3   4   329575.72 1169.32   1 0.49239-0.20123-0.66644 0.91916 0.55981-0.33857
   3   4   469550.14 2329.99   1 0.02114 0.27554-0.53635 0.78918 0.84372-0.54886
   3  -4   473385.67 2580.81   1-0.59475 0.89179-0.30377 0.05102 0.74429-0.44954
  -3  -4  -471235.87 2375.52   1-0.84231 0.54534-0.10061-0.15217 0.52950-0.82428
  -3  -4  -472623.78 2581.61   1-0.91632 0.61961 0.31482-0.56744 0.24747-0.54228
  -3   4  -468542.72 2318.09   1-0.24212-0.05493 0.81066-0.55781 0.53310-0.82814
   3  -4   467190.83 2285.96   1 0.58046-0.28346 0.69783-0.95085 0.41963-0.12456
  -3   4  -465308.85 2347.26   1 0.40009-0.69703 0.91617-0.66353-0.02320-0.27176
   3   4   471495.86 2598.96   1 0.45678-0.15978-0.70182 0.95454 0.54662-0.25163
   3   4   5 1396.67  157.38   1 0.93750-0.63428-0.04323 0.29605-0.34528 0.71417
   3   4   5 1033.41  207.60   1-0.14390 0.44672-0.49804 0.75089 0.85512-0.48641
   3  -4   5 2658.47  518.58   1-0.63179 0.93471-0.28002 0.02727 0.72278-0.35434
  -3  -4  -5 1517.61  274.43   1-0.94504 0.64243 0.25185-0.50441 0.20848-0.57692
  -3   4  -5 1263.51  205.85   1-0.47231 0.16935 0.73025-0.47744 0.49360-0.86218
   3  -4   5 1351.21  230.90   1 0.55292-0.25008 0.71321-0.96623 0.43082-0.06197
  -3   4  -5  947.39  205.40   1 0.36165-0.66443 0.93071-0.67807-0.05448-0.31423
   3   4   5  942.62  451.17   1 0.43218-0.12933-0.72451 0.97723 0.53693-0.16820
   3   4   6 9183.12  870.44   1 0.97014-0.66070-0.14726 0.40008-0.19268 0.63513
   3   4   612828.70  616.97   1-0.26295 0.57162-0.46056 0.71341 0.84778-0.40532
   3  -4   6 8900.42  680.33   1-0.65519 0.96400-0.26413 0.01137 0.70778-0.26565
  -3  -4  -610430.87 1832.51   1-0.96796 0.65945 0.18662-0.43918 0.16797-0.61011
  -3   4  -613694.66  593.25   1-0.68523 0.37646 0.59641-0.34365 0.41802-0.86033
   3  -4   6 8527.78  423.51   1 0.54077-0.23209 0.71963-0.97266 0.43552 0.00708
  -3   4  -613971.92 1688.35   1 0.32113-0.62974 0.94307-0.69043-0.08648-0.35597
   3   4   613879.23  904.87   1 0.41752-0.10883-0.73739 0.99011 0.53096-0.08848
   3   4   727601.91 1560.40   1-0.34183 0.65635-0.43085 0.68370 0.83517-0.31896
   3  -4   727970.69 1771.23   1-0.66842 0.98311-0.25480 0.00205 0.69877-0.18295
  -3  -4  -730936.17 3144.50   1-0.98477 0.67036 0.11968-0.37224 0.12608-0.64190
  -3   4  -725203.72 1645.32   1-0.85514 0.54083 0.41609-0.16346 0.30916-0.82509
  -3   4  -726476.67 1873.65   1 0.27866-0.59310 0.95298-0.70034-0.11903-0.39717
   3   4   727236.11 1647.74   1 0.41159-0.09705-0.74248 0.99520 0.52849-0.01227
   3   4   818407.59 1080.26   1-0.39045 0.71081-0.41040 0.66325 0.82408-0.23414
   3  -4   822461.67 1511.63   1-0.67384 0.99442-0.25092-0.00183 0.69496-0.10545
  -3  -4  -816633.59 2019.05   1-0.99528 0.67444 0.04708-0.29991 0.08474-0.67466
  -3   4  -817434.74 2670.17   1 0.23476-0.55519 0.96002-0.70729-0.15245-0.43760
   3   4   819991.47 1292.74   1 0.41320-0.09282-0.74110 0.99382 0.52917 0.06079
   3  -4   9  630.75  590.59   1-0.67301 0.99947-0.25152-0.00123 0.69555-0.03235
  -3  -4  -9  863.36  274.75   1-0.99891 0.67214-0.02334-0.22948 0.04030-0.70395
  -3   4  -9  674.59  237.06   1 0.18857-0.51485 0.96433-0.71160-0.18574-0.47806
   3   4   9 1620.22  517.06   1 0.42136-0.09513-0.73406 0.98678 0.53254 0.13117
   3  -4  1012856.66 1425.80   1-0.66695 0.99930-0.25585 0.00310 0.69979 0.03709
  -3  -4 -10 8764.75 1003.34   1-0.99545 0.66276-0.09505-0.15777-0.00537-0.73201
  -3   4 -10 8949.73 1855.91   1 0.14050-0.47264 0.96548-0.71275-0.21931-0.51826
   3   4  1011656.07 1316.11   1 0.43522-0.10315-0.72177 0.97449 0.53815 0.19929
   3  -4  11 9389.88 1345.92   1-0.65633 0.99456-0.26333 0.01058 0.70702 0.10355
  -3   4 -11 5122.99 1554.24   1 0.09051-0.42849 0.96319-0.71046-0.25309-0.55823
   3   4  11 9088.27 1222.94   1 0.45413-0.11620-0.70433 0.95705 0.54559 0.26560
  -3   5  11 6116.20  990.59   1 0.63023-0.83995 0.66703-0.35081 0.39732 0.41400
   3   5 -10 4762.72 1307.00   1 0.96427-0.74966-0.11754 0.43357-0.23740-0.50000
   3  -5 -10 3635.63  940.38   1 0.97316-0.75856-0.20977-0.10625-0.09453-0.64287
  -3   5  10 4575.54  885.11   1 0.65906-0.87458 0.64714-0.33092 0.38319 0.35438
   3   5  -9 6126.24 1675.35   1 0.97024-0.74970-0.14788 0.46391-0.19173-0.47193
   3  -5  -9 3061.17  742.77   1 0.96293-0.74246-0.26969-0.04631 0.00456-0.66828
  -3   5   9 9516.68 1001.40   1 0.68189-0.90322 0.63023-0.31400 0.37125 0.29256
   3   5  -9 6315.82 1210.48   1 0.57284-0.35165 0.80895-0.49311 0.13204-0.79572
   3   5  -834364.38 2202.39   1 0.97327-0.74681-0.17815 0.49418-0.14490-0.44502
   3  -5  -834053.75 2796.06   1 0.93658-0.71021-0.33143 0.01542 0.11384-0.70381
  -3   5   834657.40 2090.40   1 0.69889-0.92603 0.61690-0.30067 0.36189 0.22816
   3   5  -833257.04 1825.18   1 0.65444-0.42742 0.72443-0.40849 0.21655-0.80649
   3   5  -720235.22 3226.63   1 0.97324-0.74085-0.20847 0.52450-0.09663-0.41955
   3  -5  -724087.50 1409.61   1 0.88915-0.65681-0.39335 0.07742 0.23384-0.75006
  -3  -5   721645.11 1764.98   1-0.78294 0.55084 0.50465-0.82059 0.36375 0.15227
  -3   5   720663.19 1835.04   1 0.70999-0.94293 0.60784-0.29162 0.35556 0.16073
   3   5  -719232.42 1650.32   1 0.72510-0.49226 0.62017-0.30422 0.29935-0.81555
   3   5  -618123.50 1818.16   1 0.96989-0.73158-0.23900 0.55504-0.04657-0.39586
   3  -5  -615314.66  699.74   1 0.81313-0.57491-0.45426 0.13833 0.36395-0.80643
  -3  -5   615326.47  640.83   1-0.74267 0.50468 0.54566-0.86160 0.38817 0.05413
   3   5  -615271.78  634.07   1 0.59275-0.35414 0.69058-0.37430 0.41440-0.85701
  -3   5   619185.63 1217.60   1 0.71478-0.95352 0.60384-0.28761 0.35277 0.08977
  -3   5   613732.02  517.64   1 0.16838-0.40690 0.96522-0.64930-0.19997 0.64251
  -3   5   616350.77  596.67   1 0.58735-0.82602 0.79588-0.47993 0.14691 0.29554
   3   5  -616774.44  821.79   1 0.78038-0.54183 0.49813-0.18228 0.37797-0.82047
   3   5  -5104897.0 3542.84   1 0.96281-0.71874-0.27010 0.58611 0.00527-0.37400
   3  -5  -5112774.7 3703.55   1 0.70129-0.45711-0.50867 0.19264 0.49943-0.86829
  -3  -5   5105662.5 3447.13   1-0.73007 0.48618 0.55751-0.87345 0.39518-0.02658
   3   5  -5101110.5 3287.29   1 0.32000-0.07561 0.80422-0.48795 0.50081-0.86958
  -3   5   5113312.5 3883.27   1 0.71251-0.95705 0.60575-0.28952 0.35409 0.01468
  -3   5   5105778.5 3400.52   1 0.65852-0.90301 0.71936-0.40342 0.22103 0.14768
   3   5  -5109449.1 3630.97   1 0.81779-0.57339 0.35962-0.04372 0.44930-0.81810
   3   5  -4127674.8 4308.44   1 0.95147-0.70150-0.30175 0.61776 0.06034-0.35533
   3  -5  -4122045.1 4059.88   1 0.54912-0.29871-0.54844 0.23231 0.63060-0.92563
  -3  -5   4121531.3 4037.61   1-0.73486 0.48507 0.55306-0.86900 0.39255-0.09767
   3   5  -4125198.3 4135.78   1 0.06949 0.18070 0.84083-0.52470 0.53681-0.83188
  -3   5   4134375.5 4587.24   1 0.70191-0.95226 0.61446-0.29823 0.36019-0.06516
  -3   5   4133837.9 4395.05   1 0.66736-0.91767 0.70806-0.39211 0.23081 0.06415
   3   5  -4126881.4 4242.67   1 0.83445-0.58415 0.20968 0.10620 0.50962-0.80466
   3  -5  -4124718.7 4085.87   1 0.66990-0.41959-0.42943 0.11348 0.60565-0.90058
   3   5  -313745.06 1136.54   1 0.93485-0.67898-0.33439 0.65040 0.11929-0.34053
   3  -5  -313841.88  582.03   1 0.36073-0.10459-0.56582 0.24969 0.74142-0.96265
  -3  -5   313299.17  570.61   1-0.75120 0.49551 0.53739-0.85333 0.38327-0.16211
  -3   5   310805.03  706.89   1 0.68107-0.93721 0.63085-0.31463 0.37169-0.15042
  -3   5   314154.93  556.29   1 0.65930-0.91544 0.71838-0.40244 0.22188-0.00065
   3   5  -314239.87  628.93   1 0.82924-0.57313 0.05657 0.25936 0.55600-0.77733
   3  -5  -312230.41  457.74   1 0.80207-0.54596-0.10139-0.21454 0.58854-0.80987
   3   5  -2 6110.78  730.52   1 0.91135-0.64958-0.36844 0.68445 0.18350-0.33099
  -3   5   2 5598.04  472.30   1 0.64715-0.90910 0.65555-0.33932 0.38915-0.24163
   3   5  -162999.56 1610.78   1 0.87815-0.61056-0.40418 0.72011 0.25586-0.32961
   3  -5  -180682.73 2032.55   1-0.05062 0.31834-0.52155 0.20551 0.85171-0.92542
  -3  -5   175849.35 1971.57   1-0.80365 0.53630 0.48213-0.79792 0.34883-0.27513
  -3   5   163622.12 1748.60   1 0.59612-0.86392 0.68855-0.37227 0.41294-0.33917
  -3   5   163971.80 1652.38   1 0.62007-0.88786 0.76360-0.44765 0.18004-0.10630
   3   5  -167647.55 1785.84   1 0.76416-0.49616-0.22673 0.54278 0.60385-0.67764
   3   5   0 5560.00  288.55   1 0.83060-0.55713-0.44266 0.75858 0.33785-0.33785
  -3  -5   0 2773.42  241.49   1 0.33457-0.60822-0.56611 0.24998 0.75337-0.75337
   3  -5   0 3637.20  417.36   1-0.22688 0.50046-0.47282 0.15676 0.85144-0.85144
  -3  -5   0 3741.94  729.48   1-0.83368 0.56046 0.44522-0.76100 0.32672-0.32672
  -3   5   0 5520.05  470.00   1 0.52275-0.79639 0.72879-0.41250 0.44226-0.44226
  -3   5   0 5990.15  372.13   1 0.59329-0.86693 0.79046-0.47461 0.15220-0.15220
   3   5   1117522.8 2804.94   1 0.76055-0.48111-0.48346 0.79950 0.43338-0.35960
  -3  -5  -1116505.8 2772.14   1 0.06699-0.34630-0.54429 0.22824 0.83621-0.90993
   3  -5   1122792.3 3036.57   1-0.36659 0.64602-0.42063 0.10456 0.82986-0.75612
  -3  -5  -1118839.0 2961.70   1-0.86394 0.58485 0.40337-0.71915 0.30146-0.37517
  -3   5  -1116103.2 2875.28   1 0.42058-0.70006 0.77274-0.45645 0.47537-0.54914
  -3   5  -1122675.5 3047.28   1 0.56321-0.84267 0.81714-0.50130 0.12271-0.19645
   3   5   1126689.6 3162.08   1 0.66451-0.38510-0.43871 0.75466 0.60494-0.53120
   3   5   259895.07 1826.21   1 0.65493-0.36962-0.52415 0.84018 0.54435-0.39681
  -3  -5  -257104.85 1725.75   1-0.29419 0.00891-0.44928 0.13322 0.84355-0.99104
   3  -5   257144.71 1876.65   1-0.47068 0.75596-0.37288 0.05682 0.79962-0.65214
  -3  -5  -260831.09 2005.40   1-0.89303 0.60807 0.35733-0.67312 0.27348-0.42089
  -3   5  -257281.11 1814.29   1 0.28248-0.56789 0.81340-0.49712 0.50851-0.65602
  -3   5  -261022.83 1989.77   1 0.53024-0.81552 0.84289-0.52704 0.09154-0.23902
   3   5   261776.01 2081.30   1 0.61671-0.33148-0.51392 0.82987 0.59628-0.44881
   3   5   350836.45 1711.73   1 0.50057-0.20963-0.55584 0.87196 0.66367-0.44240
  -3  -5  -353775.17 1793.75   1-0.65054 0.35939-0.26734-0.04859 0.71085-0.93192
  -3  -5  -352747.76 1924.34   1-0.91988 0.62905 0.30773-0.62352 0.24312-0.46423
  -3   5  -349200.46 1711.48   1 0.10366-0.39495 0.83908-0.52295 0.53403-0.75533
  -3   5  -349710.37 1852.61   1 0.49475-0.78587 0.86701-0.55117 0.05916-0.28038
   3   5   352522.05 1930.54   1 0.57523-0.28418-0.57070 0.88665 0.58600-0.36480
   3   5   416464.77  627.19   1 0.30465-0.00765-0.56588 0.88201 0.76613-0.47115
   3  -5   412623.44  721.65   1-0.59663 0.89367-0.30261-0.01332 0.74327-0.44851
  -3  -5  -411362.06  457.91   1-0.87508 0.57811-0.06053-0.25544 0.48016-0.77493
  -3  -5  -413342.01 1693.84   1-0.94363 0.64692 0.25532-0.57103 0.21063-0.50538
  -3   5  -415593.59  646.93   1-0.11379-0.18335 0.83334-0.51721 0.54091-0.83598
   3  -5   410663.09  504.12   1 0.74596-0.44919 0.57636-0.89259 0.33367-0.03864
  -3   5  -415160.34  738.50   1 0.45701-0.75395 0.88908-0.57323 0.02588-0.32085
   3   5   415309.98  789.57   1 0.54162-0.24462-0.61202 0.92792 0.57625-0.28126
   3   5   570862.13 2523.13   1 0.96083-0.65732-0.10449 0.42052-0.25665 0.62536
   3   5   581774.58 2920.76   1 0.10657 0.19590-0.55018 0.86623 0.82821-0.45963
   3  -5   565202.19 2528.24   1-0.63142 0.93434-0.28027-0.03566 0.72301-0.35457
  -3  -5  -574588.77 2838.25   1-0.96377 0.66116 0.20009-0.51579 0.17636-0.54481
  -3   5  -581387.69 2920.30   1-0.35994 0.05701 0.77663-0.46057 0.51698-0.88578
   3  -5   563606.27 2309.95   1 0.73836-0.43579 0.58330-0.89953 0.33848 0.03030
  -3   5  -576002.84 2863.08   1 0.41760-0.72038 0.90858-0.59278-0.00864-0.36007
   3   5   580612.05 3060.44   1 0.51676-0.21391-0.64036 0.95626 0.56823-0.19950
   3  -5   673507.38 3808.35   1-0.65363 0.96244-0.26521-0.05073 0.70881-0.26668
  -3  -5  -676536.21 3911.30   1-0.97977 0.67125 0.14257-0.45827 0.14044-0.58257
  -3   5  -674266.63 3678.22   1-0.61007 0.30121 0.65211-0.33610 0.45006-0.89236
  -3   5  -671696.66 3693.65   1 0.37586-0.68447 0.92567-0.60987-0.04302-0.39943
   3   5   672182.93 3738.63   1 0.50026-0.19156-0.65820 0.97410 0.56258-0.12011
   3   5   7 4409.58  378.01   1-0.17011 0.48463-0.49051 0.80657 0.85466-0.33846
   3  -5   7 6487.96  806.67   1-0.66634 0.98104-0.25629-0.05964 0.70021-0.18439
  -3  -5  -7 4072.98  881.87   1-0.99126 0.67635 0.07960-0.39564 0.10512-0.62130
  -3   5  -7 4906.38  625.39   1 0.33224-0.64669 0.93997-0.62417-0.07780-0.43840
   3   5   7 5964.72  774.26   1 0.49151-0.17697-0.66736 0.98326 0.55949-0.04327
   3  -5   816099.61 1074.43   1-0.67165 0.99223-0.25249-0.06344 0.69651-0.10700
  -3  -5  -813643.53 1664.28   1-0.99764 0.67680 0.01769-0.33373 0.06625-0.65616
  -3   5  -810624.92 1475.45   1 0.28678-0.60706 0.95132-0.63551-0.11288-0.47706
   3   5   811772.59  816.37   1 0.48977-0.16938-0.66915 0.98505 0.55887 0.03108
   3  -5   9 9656.65 1072.06   1-0.67097 0.99744-0.25298-0.06295 0.69698-0.03378
  -3  -5  -9 9759.77  906.32   1-0.99860 0.67184-0.04586-0.27017 0.02600-0.68966
  -3   5  -9 7230.21 1923.26   1 0.23994-0.56622 0.95933-0.64342-0.14865-0.51516
   3   5   9 7757.96  770.26   1 0.49431-0.16807-0.66445 0.98035 0.56049 0.10321
   3  -5  10  934.10  449.52   1-0.66526 0.99761-0.25705-0.05888 0.70095 0.03592
  -3  -5 -10 1102.97  333.55   1-0.99370 0.66101-0.11097-0.20506-0.01558-0.72181
  -3   5 -10 1007.46  385.18   1 0.19080-0.52293 0.96419-0.64828-0.18416-0.55341
   3   5  10 1278.94  436.48   1 0.50445-0.17237-0.65374 0.96964 0.56404 0.17341
  -3   6  1110602.59 1428.64   1 0.65358-0.86330 0.65105-0.27157 0.38595 0.42537
   3   6 -1020200.23 3417.23   1 0.95831-0.74373-0.09704 0.47626-0.26871-0.46906
  -3   6  1019541.25 2414.19   1 0.68054-0.89607 0.63126-0.25178 0.37198 0.36559
   3   6  -920812.47 3065.42   1 0.96589-0.74536-0.12451 0.50375-0.22701-0.43664
   3  -6  -918372.94 2029.10   1 0.96460-0.74413-0.26362-0.11557-0.00576-0.65795
  -3   6   924393.22 1919.93   1 0.70202-0.92336 0.61437-0.23490 0.36013 0.30368
   3   6  -923254.65 1662.30   1 0.60954-0.38835 0.77461-0.39560 0.16859-0.83227
   3   6  -8 3863.73  719.11   1 0.97083-0.74437-0.15203 0.53127-0.18538-0.40453
   3  -6  -8 2981.85  538.21   1 0.93729-0.71091-0.33020-0.04900 0.11159-0.70156
  -3   6   8 4158.77  705.47   1 0.71821-0.94534 0.60095-0.22147 0.35075 0.23930
   3   6  -8 3332.44  387.25   1 0.68011-0.45310 0.69086-0.31173 0.24523-0.83517
   3   6  -7 7301.01 1120.12   1 0.97332-0.74094-0.17923 0.55847-0.14320-0.37298
   3  -6  -7 6242.36  510.09   1 0.88595-0.65361-0.39659 0.01748 0.24039-0.75662
  -3   6   7 8077.15  774.43   1 0.72903-0.96197 0.59160-0.21213 0.34424 0.17205
   3   6  -7 7512.95  654.66   1 0.74010-0.50726 0.59208-0.21295 0.31886-0.83506
   3   6  -620829.97 2323.58   1 0.97335-0.73504-0.20616 0.58540-0.10036-0.34207
   3  -6  -6 8029.35  866.69   1 0.80245-0.56424-0.46083 0.08172 0.37907-0.82155
  -3  -6   6 7969.91  957.41   1-0.89262 0.65462 0.35803-0.73697 0.27391 0.16830
  -3   6   618780.07 2005.45   1 0.73420-0.97294 0.58703-0.20756 0.34107 0.10147
  -3   6   619438.15 1936.26   1 0.71412-0.95278 0.63911-0.25998 0.28559 0.15686
   3   6  -619273.86 2002.57   1 0.78644-0.54789 0.48072-0.10170 0.38783-0.83034
   3   6  -518597.94 2228.89   1 0.97084-0.72660-0.23289 0.61213-0.05671-0.31198
   3  -6  -510118.98  552.00   1 0.68004-0.43586-0.51617 0.13693 0.52067-0.88953
  -3  -6   511080.93  872.63   1-0.86501 0.62114 0.40179-0.78073 0.30051 0.06800
   3   6  -513415.72  572.22   1 0.19619 0.04819 0.82945-0.44992 0.52298-0.89176
  -3   6   517827.01 1140.81   1 0.73309-0.97763 0.58802-0.20855 0.34175 0.02703
  -3   6   515659.94  657.59   1 0.72172-0.96621 0.62613-0.24700 0.29507 0.07364
   3   6  -515237.38  814.20   1 0.81808-0.57368 0.35809 0.02098 0.45000-0.81880
   3   6  -445749.85 2169.38   1 0.96563-0.71566-0.25960 0.63881-0.01258-0.28239
   3  -6  -448895.72 1673.20   1 0.51693-0.26652-0.55359 0.17424 0.65292-0.94794
  -3  -6   452945.01 1988.58   1-0.85403 0.60429 0.41766-0.79661 0.31011-0.01530
  -3   6   453921.89 2073.77   1 0.72468-0.97503 0.59539-0.21592 0.34688-0.05185
  -3   6   450312.41 1716.69   1 0.71621-0.96652 0.63559-0.25646 0.28818 0.00678
   3   6  -451075.93 1818.22   1 0.83361-0.58331 0.22809 0.15097 0.50305-0.79809
   3  -6  -450735.94 1695.75   1 0.68122-0.43091-0.40932 0.03018 0.60695-0.90188
   3   6  -3108723.4 3687.61   1 0.95756-0.70169-0.28629 0.66549 0.03319-0.25443
   3  -6  -3112735.1 3761.16   1 0.32168-0.06553-0.56609 0.18673 0.75898-0.98022
  -3  -6   3114825.8 4029.35   1-0.85455 0.59894 0.41693-0.79587 0.30967-0.08856
  -3   6   3112285.8 3869.44   1 0.70739-0.96354 0.60999-0.23052 0.35706-0.13579
  -3   6   3112905.9 3759.61   1 0.70317-0.95931 0.65682-0.27769 0.27226-0.05103
   3   6  -3113160.3 3838.87   1 0.83262-0.57651 0.09656 0.28256 0.54535-0.76667
   3  -6  -395915.12 3180.60   1 0.78655-0.53031-0.15781-0.22144 0.59701-0.81837
   3   6  -267507.65 2385.86   1 0.94625-0.68448-0.31318 0.69238 0.08071-0.22820
   3  -6  -265141.65 2247.75   1 0.11413 0.14779-0.55121 0.17195 0.82652-0.97395
  -3  -6   264624.53 2261.99   1-0.86301 0.60153 0.40474-0.78368 0.30229-0.15489
  -3   6   270076.99 2500.01   1 0.67889-0.94084 0.63251-0.25304 0.37286-0.22534
  -3   6   269693.03 2390.13   1 0.68471-0.94667 0.68440-0.30527 0.25051-0.10303
   3   6  -270250.77 2456.70   1 0.81681-0.55477-0.03153 0.41065 0.57604-0.72359
   3   6  -117859.58  712.47   1 0.93109-0.66341-0.34056 0.71977 0.13071-0.20445
   3  -6  -119200.23  769.22   1-0.08101 0.34874-0.51441 0.13516 0.85370-0.92742
  -3  -6   118129.72 1404.94   1-0.87673 0.60938 0.38394-0.76288 0.28968-0.21598
  -3   6   117842.59  880.87   1 0.63583-0.90358 0.66329-0.28382 0.39465-0.32089
  -3   6   119759.51  780.45   1 0.66190-0.92968 0.71510-0.33597 0.22475-0.15100
   3   6  -117295.00  773.75   1 0.78882-0.52083-0.14995 0.52921 0.59603-0.66982
   3   6   093682.78 2988.38   1 0.91097-0.63740-0.36892 0.74813 0.18442-0.18442
  -3  -6   095995.75 2882.30   1 0.38372-0.65737-0.56517 0.18581 0.73029-0.73029
   3  -6   0112762.5 3456.84   1-0.24663 0.52021-0.46621 0.08693 0.84959-0.84959
  -3  -6   0106272.0 3279.75   1-0.89362 0.62039 0.35633-0.73528 0.27288-0.27288
  -3   6   096325.68 3013.99   1 0.57344-0.84708 0.70185-0.32231 0.42255-0.42255
  -3   6   098510.75 3051.33   1 0.63541-0.90902 0.74685-0.36772 0.19609-0.19609
   3   6   0100257.6 3150.83   1 0.75345-0.47957-0.25557 0.63483 0.60579-0.60579
   3   6   186785.82 2618.66   1 0.88346-0.60412-0.39907 0.77818 0.24541-0.17166
  -3  -6  -192787.21 2777.13   1 0.12635-0.40566-0.55279 0.17354 0.82367-0.89739
   3  -6   192086.43 2857.39   1-0.37668 0.65610-0.41636 0.03708 0.82749-0.75375
  -3  -6  -187575.53 2752.69   1-0.91201 0.63292 0.32315-0.70209 0.25258-0.32628
  -3   6  -191228.08 2837.25   1 0.48592-0.76541 0.74612-0.36658 0.45515-0.52892
  -3   6  -190455.07 2848.85   1 0.60575-0.88521 0.77840-0.39939 0.16474-0.23848
   3   6   241335.99 1406.54   1 0.84441-0.55919-0.43264 0.81175 0.31587-0.16838
  -3  -6  -240645.24 1372.34   1-0.25609-0.02918-0.46295 0.08368 0.84857-0.99606
   3  -6   245853.51 1729.79   1-0.47370 0.75898-0.37137-0.00789 0.79854-0.65106
  -3  -6  -247641.40 1771.51   1-0.93057 0.64566 0.28545-0.66429 0.22921-0.37659
  -3   6  -242304.48 1538.24   1 0.36557-0.65098 0.79120-0.41167 0.49025-0.63776
  -3   6  -243184.48 1638.36   1 0.57325-0.85854 0.80860-0.42959 0.13244-0.27992
   3   6   244822.76 1741.15   1 0.67593-0.39070-0.41882 0.79796 0.60638-0.45891
   3   6   334869.54 1178.93   1 0.78346-0.49227-0.47167 0.85092 0.40460-0.18328
   3  -6   328047.32 1253.26   1-0.54366 0.83478-0.33408-0.04519 0.76994-0.54872
  -3  -6  -326058.93  896.85   1-0.67957 0.38842-0.24675-0.13237 0.69085-0.91192
  -3  -6  -326428.39 1098.28   1-0.94828 0.65746 0.24368-0.62252 0.20342-0.42449
  -3   6  -335870.44 1303.34   1 0.20572-0.49699 0.82801-0.44848 0.52160-0.74286
  -3   6  -338309.14 1489.90   1 0.53818-0.82929 0.83699-0.45798 0.09895-0.32017
   3   6   336999.97 1521.40   1 0.64108-0.35003-0.47706 0.85620 0.60118-0.37998
   3   6   440782.73 1345.60   1 0.93530-0.63799-0.03858 0.41780-0.35172 0.64683
   3   6   443439.60 1419.06   1 0.67766-0.38059-0.51697 0.89621 0.52298-0.22789
  -3  -6  -429230.31 2481.79   1-0.96428 0.66757 0.19850-0.57734 0.17537-0.47013
  -3   6  -447466.07 1647.14   1 0.00013-0.29729 0.84133-0.46198 0.54050-0.83557
  -3   6  -448588.76 1838.29   1 0.50075-0.79769 0.86317-0.48416 0.06455-0.35952
   3   6   448386.71 1883.72   1 0.61158-0.31471-0.52132 0.90046 0.59513-0.30020
   3   6   5 4733.18  494.55   1 0.50398-0.20148-0.55539 0.93474 0.66146-0.29268
   3  -6   5 3026.04  599.71   1-0.62596 0.92888-0.28387-0.09525 0.72635-0.35790
  -3  -6  -5 4295.10  783.56   1-0.97789 0.67528 0.15034-0.52919 0.14531-0.51375
  -3   6  -5 4936.96  560.11   1-0.24854-0.05438 0.80915-0.42987 0.53244-0.90124
  -3   6  -5 5748.42  778.70   1 0.46114-0.76391 0.88683-0.50782 0.02947-0.39818
   3   6   5 5355.59  727.74   1 0.58843-0.28573-0.55337 0.93251 0.58951-0.22084
   3  -6   6 8912.96  948.12   1-0.64758 0.95639-0.26937-0.10975 0.71278-0.27065
  -3  -6  -6 9641.42 1898.68   1-0.98854 0.68003 0.09958-0.47842 0.11344-0.55557
  -3   6  -610918.09  924.84   1-0.52637 0.21751 0.70278-0.32356 0.47856-0.92086
  -3   6  -610971.04 1483.40   1 0.41990-0.72851 0.90754-0.52858-0.00671-0.43574
   3   6   610508.46 1054.11   1 0.57194-0.26343-0.57492 0.95406 0.58509-0.14269
   3  -6   752160.89 2864.68   1-0.66018 0.97487-0.26064-0.11848 0.70443-0.18861
  -3  -6  -754450.35 2971.71   1-0.99567 0.68075 0.04315-0.42240 0.08227-0.59845
  -3   6  -750521.73 2777.13   1 0.37625-0.69070 0.92553-0.54656-0.04271-0.47349
   3   6   751625.45 2814.37   1 0.56201-0.24767-0.58744 0.96658 0.58228-0.06614
   3  -6   820596.94 1641.15   1-0.66566 0.98624-0.25677-0.12235 0.70068-0.11117
  -3  -6  -818839.40 2381.02   1-0.99880 0.67796-0.01251-0.36672 0.04716-0.63707
  -3   6  -819487.05 2956.65   1 0.33066-0.65094 0.94043-0.56146-0.07904-0.51090
   3   6   818179.58 1426.86   1 0.55808-0.23769-0.59222 0.97129 0.58122 0.00874
   3  -6   9 2019.01  744.19   1-0.66533 0.99179-0.25700-0.12211 0.70091-0.03771
  -3  -6  -9 1786.69  537.41   1-0.99748 0.67071-0.07010-0.30913 0.01056-0.67421
  -3   6  -9 1778.94  559.84   1 0.28313-0.60925 0.95208-0.57311-0.11565-0.54804
   3   6   9 3222.69  719.21   1 0.56010-0.23386-0.58973 0.96881 0.58180 0.08190
   3  -6  10 4211.69  923.40   1-0.66008 0.99243-0.26071-0.11841 0.70449 0.03238
  -3   6 -10 5108.32 1559.13   1 0.23410-0.56623 0.96010-0.58101-0.15293-0.58464
   3   6  10 7313.31  874.40   1 0.56757-0.23577-0.58047 0.95961 0.58387 0.15346
   3   7 -10 1688.67  848.68   1 0.95069-0.73610-0.07466 0.51709-0.30101-0.43676
  -3   7  10  795.00  467.78   1 0.69500-0.91053 0.62001-0.17729 0.36407 0.37349
   3   7  -9 8562.34 2099.03   1 0.95925-0.73876-0.10014 0.54256-0.26419-0.39981
  -3   7   910064.56  989.13   1 0.71528-0.93661 0.60343-0.16071 0.35248 0.31133
   3   7  -9 9671.22  875.82   1 0.63359-0.41240 0.74889-0.30657 0.19418-0.85786
   3   7  -8 8518.63 2194.92   1 0.96590-0.73944-0.12455 0.56699-0.22697-0.36295
  -3   7   810654.18 1050.55   1 0.73064-0.95778 0.59019-0.14747 0.34326 0.24679
   3   7  -811310.31  979.25   1 0.69620-0.46919 0.66755-0.22523 0.26395-0.85389
   3   7  -724373.41 3537.48   1 0.97035-0.73796-0.14864 0.59108-0.19057-0.32560
   3  -7  -723565.08 1299.19   1 0.88701-0.65468-0.39553-0.04676 0.23823-0.75445
  -3   7   726759.59 1686.81   1 0.74107-0.97400 0.58085-0.13813 0.33678 0.17952
   3   7  -726954.33 1557.79   1 0.74797-0.51530 0.57571-0.13352 0.33028-0.84654
   3   7  -6 8910.70 1956.14   1 0.97289-0.73458-0.17197 0.61441-0.15456-0.28787
   3  -7  -610328.29  718.11   1 0.79705-0.55883-0.46402 0.02172 0.38651-0.82899
  -3  -7   6 7866.33  801.23   1-0.97019 0.73248 0.17906-0.62104 0.16325 0.27887
  -3   7   6 8297.37  804.28   1 0.74630-0.98504 0.57604-0.13333 0.33344 0.10909
  -3   7   6 7750.04  539.20   1 0.74464-0.98318 0.58258-0.14039 0.32574 0.11676
   3   7  -6 7964.80  689.09   1 0.78885-0.55030 0.47344-0.03125 0.39187-0.83437
   3   7  -543780.48 3306.57   1 0.97365-0.72941-0.19446 0.63691-0.11910-0.24960
   3  -7  -552048.65 2627.20   1 0.66533-0.42116-0.52095 0.07850 0.53472-0.90358
  -3  -7   544895.20 2265.33   1-0.94439 0.70078 0.25345-0.69543 0.20947 0.15897
  -3   7   539594.16 2231.26   1 0.74585-0.99039 0.57647-0.13375 0.33374 0.03504
  -3   7   543564.35 2211.76   1 0.74479-0.98921 0.58226-0.14007 0.32595 0.04280
   3   7  -537460.67 2025.09   1 0.81696-0.57256 0.36397 0.07827 0.44731-0.81611
   3   7  -444166.03 1796.68   1 0.97273-0.72256-0.21601 0.65845-0.08441-0.21054
   3  -7  -453891.12 2003.60   1 0.49341-0.24300-0.55674 0.11417 0.66825-0.96328
  -3  -7   450411.25 1891.63   1-0.92892 0.67940 0.28903-0.73102 0.23142 0.06333
  -3   7   436510.38 1654.39   1 0.73884-0.98918 0.58287-0.14015 0.33818-0.04315
  -3   7   440611.60 1554.43   1 0.73737-0.98769 0.59739-0.15507 0.31525-0.02028
   3   7  -442711.61 1707.72   1 0.83221-0.58191 0.24964 0.19260 0.49507-0.79011
   3   7  -356180.98 2024.33   1 0.97031-0.71422-0.23642 0.67887-0.05086-0.17035
   3  -7  -358080.15 1984.98   1 0.29403-0.03788-0.56565 0.12307 0.77043-0.99167
  -3  -7   352853.28 2095.04   1-0.92216 0.66655 0.30310-0.74520 0.24027-0.01916
  -3   7   354105.18 1871.08   1 0.72473-0.98086 0.62083-0.17851 0.29887-0.07765
   3   7  -357842.86 2054.06   1 0.83459-0.57839 0.13448 0.30776 0.53419-0.75547
   3   7  -2110465.1 3661.96   1 0.96665-0.70488-0.25533 0.69773-0.01979-0.12769
   3  -7  -2105389.9 3484.29   1 0.08920 0.17272-0.54771 0.10524 0.83189-0.97933
  -3  -7   292437.98 3327.72   1-0.92240 0.66092 0.30262-0.74472 0.23997-0.09257
  -3   7   2120524.6 4111.69   1 0.69923-0.96118 0.61663-0.17391 0.36171-0.21419
  -3   7   2118359.8 3902.21   1 0.70758-0.96954 0.64982-0.20750 0.27758-0.13009
   3   7  -2116865.2 3943.46   1 0.82527-0.56324 0.02270 0.41960 0.56427-0.71182
   3   7  -173499.64 2581.37   1 0.96216-0.69449-0.27231 0.71471 0.00904-0.08279
   3  -7  -166911.28 2316.21   1-0.09820 0.36592-0.51014 0.06768 0.85446-0.92817
  -3  -7   163909.68 2271.72   1-0.92764 0.66042 0.29178-0.73377 0.23311-0.15942
  -3   7   183914.52 2950.92   1 0.66184-0.92959 0.64514-0.20242 0.38177-0.30801
  -3   7   181696.03 2820.74   1 0.68648-0.95427 0.68186-0.23954 0.25256-0.17882
   3   7  -183272.39 2911.91   1 0.80650-0.53854-0.08246 0.52476 0.58545-0.65922
   3   7   030595.09 1132.66   1 0.95755-0.68398-0.28633 0.72874 0.03326-0.03326
  -3  -7   021615.22  805.02   1 0.41724-0.69081-0.56374 0.12117 0.71280-0.71280
   3  -7   025358.26 1061.14   1-0.25485 0.52843-0.46338 0.02090 0.84871-0.84871
  -3  -7   025063.88 1181.21   1-0.93612 0.66300 0.27308-0.71506 0.22159-0.22159
  -3   7   032204.58 1287.86   1 0.60782-0.88138 0.68145-0.23873 0.40763-0.40763
  -3   7   030021.91 1199.30   1 0.66183-0.93544 0.71518-0.27286 0.22468-0.22468
   3   7   028600.28 1203.64   1 0.78069-0.50682-0.17723 0.61970 0.59925-0.59925
   3   7   137773.91 1364.16   1 0.95415-0.67468-0.29527 0.73768 0.04891 0.02483
  -3  -7  -149495.59 1645.50   1 0.16874-0.44823-0.55766 0.11507 0.81273-0.88648
   3  -7   149337.53 1796.89   1-0.37739 0.65681-0.41605-0.02643 0.82732-0.75358
  -3  -7  -151680.90 1883.63   1-0.94658 0.66757 0.24799-0.68997 0.20609-0.27978
  -3   7  -138371.43 1424.81   1 0.53154-0.81102 0.72437-0.28158 0.43901-0.51278
  -3   7  -141650.01 1578.66   1 0.63394-0.91338 0.74850-0.30618 0.19455-0.26829
   3   7   142618.94 1675.51   1 0.75157-0.47182-0.26042 0.70289 0.60606-0.53228
   3   7   264872.89 2160.83   1 0.95494-0.66957-0.29329 0.73570 0.04542 0.10206
  -3  -7  -277600.17 2504.65   1-0.23412-0.05115-0.47042 0.02794 0.85081-0.99829
   3  -7   283766.11 2874.70   1-0.46924 0.75451-0.37360-0.06887 0.80014-0.65265
  -3  -7  -285322.05 3494.94   1-0.95789 0.67298 0.21763-0.65962 0.18727-0.33465
  -3   7  -270176.93 2424.71   1 0.42649-0.71181 0.77054-0.32774 0.47367-0.62121
  -3   7  -270699.77 2493.05   1 0.60317-0.88846 0.78095-0.33877 0.16212-0.30961
   3   7   272080.41 2553.19   1 0.72168-0.43605-0.33066 0.77313 0.60814-0.46056
   3   7   318679.89  685.56   1 0.96753-0.67626-0.25136 0.69376-0.02646 0.24770
   3  -7   321051.77 1082.35   1-0.53607 0.82720-0.33834-0.10414 0.77339-0.55217
  -3  -7  -319820.66  719.86   1-0.76480 0.47371-0.17834-0.26402 0.61908-0.84017
  -3  -7  -321373.38 2624.41   1-0.96909 0.67827 0.18284-0.62482 0.16561-0.38668
  -3   7  -319230.97  837.82   1 0.28374-0.57501 0.81311-0.37033 0.50826-0.72953
  -3   7  -321779.60 1096.94   1 0.56960-0.86071 0.81175-0.36956 0.12889-0.35011
   3   7   324037.00 1316.37   1 0.69285-0.40180-0.38770 0.83003 0.60797-0.38677
   3  -7   4 8460.64  998.98   1-0.58333 0.88037-0.31078-0.13153 0.75042-0.45566
  -3  -7  -4 9651.36 1652.96   1-0.97937 0.68266 0.14424-0.58622 0.14148-0.43624
  -3   7  -4 6635.72  738.54   1 0.09481-0.39197 0.83963-0.39705 0.53481-0.82988
  -3   7  -4 5857.51  754.76   1 0.53348-0.83042 0.84050-0.39832 0.09455-0.38952
   3   7   4 6090.26  864.18   1 0.66793-0.37106-0.43283 0.87516 0.60540-0.31046
   3  -7   514773.58 1364.83   1-0.61606 0.91899-0.29031-0.15200 0.73224-0.36380
  -3  -7  -515010.49 2118.96   1-0.98806 0.68544 0.10232-0.54431 0.11516-0.48361
  -3   7  -512296.41 1049.37   1-0.14600-0.15692 0.82883-0.38634 0.54010-0.90890
  -3   7  -513207.08 1340.86   1 0.49497-0.79774 0.86687-0.42469 0.05935-0.42806
   3   7   515114.62 1445.26   1 0.64755-0.34486-0.46677 0.90910 0.60232-0.23365
  -3  -7  -610656.45 1952.58   1-0.99448 0.68549 0.05467-0.49712 0.08950-0.53194
   3   7   611406.14 1519.36   1 0.63231-0.32380-0.49065 0.93298 0.59952-0.15712
   3  -7   7 3253.28  625.36   1-0.65036 0.96506-0.26746-0.17484 0.71097-0.19515
  -3  -7  -7 2866.33  752.05   1-0.99821 0.68329 0.00681-0.44926 0.05938-0.57555
  -3   7  -7 3539.00  561.40   1 0.41171-0.72616 0.91121-0.46908-0.01356-0.50263
   3   7   7 2532.53  589.33   1 0.62241-0.30808-0.50554 0.94787 0.59751-0.08137
   3  -7   8 7543.59 1360.36   1-0.65623 0.97681-0.26340-0.17891 0.70708-0.11758
  -3  -7  -8 8166.37  795.58   1-0.99867 0.67783-0.04339-0.39905 0.02757-0.61748
  -3   7  -8 6525.66 1698.92   1 0.36667-0.68695 0.92897-0.48685-0.05044-0.53949
   3   7   8 8294.25  830.15   1 0.61780-0.29765-0.51232 0.95465 0.59652-0.00665
   3  -7   915323.58 2064.69   1-0.65640 0.98286-0.26328-0.17902 0.70697-0.04377
  -3  -7  -915160.39 1866.58   1-0.99538 0.66862-0.09575-0.34670-0.00582-0.65783
  -3   7  -914517.22 2804.37   1 0.31954-0.64566 0.94350-0.50137-0.08772-0.57597
   3   7   917420.71 2155.15   1 0.61826-0.29229-0.51165 0.95398 0.59662 0.06697
   3  -7  10 9018.35 1252.91   1-0.65171 0.98406-0.26653-0.17577 0.71008 0.02679
  -3   7 -10 6322.52 1148.92   1 0.27029-0.60225 0.95458-0.51245-0.12532-0.61210
   3   7  10 5900.32  816.03   1 0.62350-0.29170-0.50393 0.94626 0.59774 0.13959
   3   8 -10 1392.48  468.66   1 0.94099-0.72640-0.05092 0.55655-0.33457-0.40320
  -3   8  10 1300.86  472.99   1 0.70388-0.91940 0.61287-0.10690 0.35907 0.37849
   3   8 -10 1438.97  431.83   1 0.58540-0.37004 0.79778-0.29243 0.14436-0.88178
   3   8  -9 4794.12 1321.08   1 0.95046-0.72996-0.07404 0.57967-0.30189-0.36210
  -3   8   9 5051.17 1025.33   1 0.72308-0.94441 0.59678-0.09082 0.34784 0.31596
   3   8  -8 1458.90  501.95   1 0.95804-0.73164-0.09616 0.60179-0.26999-0.32022
  -3   8   8 1217.51  740.27   1 0.73767-0.96480 0.58393-0.07796 0.33891 0.25114
   3   8  -8 1262.99  507.34   1 0.70589-0.47887 0.65252-0.14701 0.27554-0.86548
   3   8  -723733.60 2832.65   1 0.96409-0.73171-0.11682 0.62247-0.23847-0.27771
  -3   8   726338.61 2355.90   1 0.74763-0.98056 0.57482-0.06885 0.33260 0.18370
   3   8  -725468.96 2123.00   1 0.75212-0.51945 0.56692-0.06156 0.33602-0.85227
   3   8  -673158.66 5259.93   1 0.96835-0.73004-0.13659 0.64224-0.20887-0.23357
   3  -8  -665316.22 3371.79   1 0.79818-0.55997-0.46335-0.04212 0.38496-0.82743
  -3   8   668798.83 3757.49   1 0.75275-0.99149 0.57002-0.06406 0.32928 0.11326
   3   8  -668277.39 3609.91   1 0.78884-0.55029 0.47347 0.03188 0.39185-0.83436
   3   8  -510839.78 1267.76   1 0.97120-0.72696-0.15487 0.66053-0.18103-0.18767
   3  -8  -511576.04  798.81   1 0.65845-0.41428-0.52308 0.01742 0.54112-0.90998
  -3  -8   5 9664.55  713.65   1-0.98428 0.74066 0.12209-0.62721 0.12759 0.24085
  -3   8   510254.34  954.51   1 0.75261-0.99715 0.57015-0.06419 0.32937 0.03941
  -3   8   511211.19  803.80   1 0.75336-0.99778 0.56423-0.05887 0.33775 0.03100
   3   8  -511018.32  836.59   1 0.81495-0.57053 0.37474 0.13061 0.44206-0.81082
   3   8  -4 5047.50 1095.54   1 0.97285-0.72268-0.17132 0.67697-0.15557-0.13938
   3  -8  -4 6131.26  590.53   1 0.47951-0.22910-0.55838 0.05258 0.67695-0.97198
  -3  -8   4 6196.11 1084.21   1-0.97193 0.72242 0.17296-0.67808 0.15945 0.13530
  -3   8   4 4371.88  636.21   1 0.74647-0.99681 0.57590-0.06993 0.33334-0.03831
  -3   8   4 4759.67  507.60   1 0.74644-0.99674 0.57887-0.07351 0.32819-0.03319
   3   8  -4 5094.78  599.97   1 0.83015-0.57985 0.27335 0.23207 0.48592-0.78096
   3   8  -366346.84 3399.51   1 0.97355-0.71745-0.18540 0.69105-0.13348-0.08773
   3  -8  -354180.17 2739.44   1 0.27787-0.02173-0.56517 0.05936 0.77676-0.99800
  -3  -8   350097.39 2657.56   1-0.96416 0.70875 0.19886-0.70399 0.17560 0.04546
  -3   8   364086.31 3359.68   1 0.73318-0.98933 0.58794-0.08198 0.34170-0.12042
  -3   8   363778.29 3241.40   1 0.73504-0.99118 0.60187-0.09636 0.31218-0.09095
   3   8  -368490.25 3538.47   1 0.83518-0.57897 0.17151 0.33392 0.52254-0.74382
   3   8  -230536.90 1340.45   1 0.97363-0.71161-0.19622 0.70187-0.11630-0.03118
   3  -8  -230618.50 1224.81   1 0.07654 0.18538-0.54579 0.04012 0.83441-0.98184
  -3  -8   224539.34 1083.13   1-0.96101 0.69970 0.20848-0.71361 0.18158-0.03420
  -3   8   231562.99 1432.79   1 0.71107-0.97302 0.60695-0.10098 0.35493-0.20742
  -3   8   229801.07 1246.48   1 0.71964-0.98160 0.62974-0.12423 0.29245-0.14497
   3   8  -232181.03 1414.58   1 0.83077-0.56874 0.07262 0.43286 0.55184-0.69939
   3   8  -1 4292.20  529.07   1 0.97350-0.70556-0.20223 0.70788-0.10668 0.03294
   3  -8  -1 2072.71  332.39   1-0.10391 0.37164-0.50869 0.00302 0.85465-0.92837
  -3  -8   1 3195.15  515.12   1-0.96170 0.69448 0.20643-0.71155 0.18031-0.10662
  -3   8   1 3801.29  447.65   1 0.67772-0.94547 0.63340-0.12743 0.37348-0.29973
  -3   8   1 3703.23  434.21   1 0.70055-0.96833 0.66091-0.15540 0.26911-0.19537
   3   8   018360.62  922.04   1 0.97356-0.69968-0.20031 0.70596-0.10975 0.10975
   3  -8   016431.82  834.02   1-0.25334 0.52692-0.46390-0.04178 0.84888-0.84888
  -3  -8   015184.42 1212.47   1-0.96523 0.69212 0.19549-0.70061 0.17350-0.17350
  -3   8   019527.16 1016.59   1 0.62970-0.90325 0.66739-0.16142 0.39757-0.39757
  -3   8   020438.85 1035.94   1 0.67801-0.95162 0.69378-0.18827 0.24283-0.24283
   3   8   019773.35 1046.43   1 0.80073-0.52686-0.10689 0.61238 0.58940-0.58940
   3   8   116893.02  750.52   1 0.97348-0.69367-0.18305 0.68870-0.13719 0.21093
  -3  -8  -110546.59  463.19   1 0.19381-0.47330-0.56002 0.05421 0.80548-0.87923
   3  -8   1 9863.07  661.18   1-0.37022 0.64965-0.41910-0.08659 0.82902-0.75528
  -3  -8  -112438.83 1662.77   1-0.97065 0.69163 0.17748-0.68260 0.16227-0.23596
  -3   8  -116330.09  874.55   1 0.56203-0.84151 0.70824-0.20219 0.42720-0.50097
  -3   8  -116408.05  893.67   1 0.65222-0.93166 0.72714-0.22163 0.21414-0.28788
   3   8   115040.09  836.10   1 0.77893-0.49918-0.18284 0.68852 0.59985-0.52606
   3   8   2 6261.34  777.84   1 0.96590-0.68017-0.12453 0.63018-0.22698 0.37446
   3  -8   2 7648.19  958.63   1-0.45840 0.74367-0.37896-0.12673 0.80389-0.65641
  -3  -8  -2 7468.11 1041.87   1-0.97706 0.69215 0.15368-0.65881 0.14740-0.29478
  -3   8  -2 6669.07  794.81   1 0.46878-0.75410 0.75361-0.24755 0.46077-0.60831
  -3   8  -2 8368.51 1012.18   1 0.62339-0.90865 0.76007-0.25456 0.18348-0.33097
   3   8   2 5905.23  788.39   1 0.75608-0.47045-0.24869 0.75437 0.60538-0.45781
   3  -8   362685.14 3220.24   1-0.52322 0.81434-0.34544-0.16025 0.77904-0.55781
  -3  -8  -362734.27 3652.37   1-0.98367 0.69286 0.12502-0.63015 0.12943-0.35050
  -3   8  -360731.85 3085.70   1 0.34109-0.63236 0.79846-0.29242 0.49609-0.71735
  -3   8  -365811.32 3416.34   1 0.59181-0.88293 0.79185-0.28650 0.15072-0.37195
   3   8   362581.85 3295.09   1 0.73374-0.44224-0.30371 0.80939 0.60776-0.38640
   3  -8   487454.11 5343.67   1-0.56981 0.86678-0.31894-0.18675 0.75735-0.46238
  -3  -8  -488145.89 5380.96   1-0.98977 0.69306 0.09220-0.59733 0.10879-0.40355
  -3   8  -482107.53 4411.50   1 0.16992-0.46705 0.83299-0.32695 0.52653-0.82155
  -3   8  -482801.68 4562.32   1 0.55741-0.85436 0.82192-0.31657 0.11715-0.41212
   3   8   484483.93 4681.13   1 0.71346-0.41608-0.34809 0.85377 0.60810-0.31295
   3  -8   515172.28 1080.46   1-0.60218 0.90510-0.29914-0.20635 0.74019-0.37175
  -3  -8  -515471.38 2730.96   1-0.99462 0.69155 0.05338-0.55904 0.08870-0.45739
  -3   8  -513076.85 1527.83   1-0.05743-0.24559 0.83867-0.33287 0.54159-0.91042
  -3   8  -515221.29 1096.82   1 0.52045-0.82322 0.84989-0.34454 0.08249-0.45121
   3   8   511490.84 1448.36   1 0.69568-0.39299-0.38228 0.88780 0.60817-0.23951
   3  -8   6 8779.29  834.22   1-0.62392 0.93273-0.28521-0.22029 0.72758-0.28544
  -3  -8  -6 6723.32 1045.23   1-0.99788 0.68889 0.01338-0.51905 0.06353-0.50597
   3   8   6 5847.62  620.48   1 0.68236-0.37385-0.40723 0.91275 0.60706-0.16466
   3  -8   7 8703.13  997.89   1-0.63717 0.95187-0.27643-0.22907 0.71943-0.20361
  -3  -8  -7 6661.92 1853.24   1-0.99890 0.68398-0.02944-0.47621 0.03643-0.55261
  -3   8  -7 6450.26 1727.36   1 0.43972-0.75416 0.89807-0.39279 0.01005-0.52625
   3   8   7 6998.47 1577.58   1 0.67329-0.35896-0.42348 0.92900 0.60607-0.08994
   3  -8   8 1435.75  644.25   1-0.64361 0.96419-0.27208-0.23342 0.71534-0.12584
  -3  -8  -8 1079.83  515.93   1-0.99716 0.67632-0.07482-0.43083 0.00755-0.59746
  -3   8  -8 1030.36  390.45   1 0.39567-0.71595 0.91799-0.41271-0.02685-0.56309
   3   8   8  753.47  393.99   1 0.66860-0.34845-0.43167 0.93719 0.60548-0.01562
   3  -8   9 9241.99 1321.70   1-0.64440 0.97087-0.27154-0.23395 0.71484-0.05164
  -3   8  -9 8241.18 1891.34   1 0.34935-0.67547 0.93478-0.42949-0.06429-0.59939
   3   8   9 9624.16 1300.79   1 0.66826-0.34228-0.43227 0.93779 0.60544 0.05815
   3   9  -910220.18 1373.52   1 0.93910-0.71861-0.04671 0.61555-0.34043-0.32356
  -3   9   9 9537.97 1305.22   1 0.72644-0.94777 0.59387-0.02466 0.34582 0.31799
   3   9  -9 9992.24 1267.40   1 0.65988-0.43868 0.71766-0.14896 0.22252-0.88620
  -3   9   829847.21 4786.56   1 0.74030-0.96744 0.58155-0.01233 0.33726 0.25279
   3   9  -826252.85 2620.23   1 0.71106-0.48405 0.64416-0.07546 0.28183-0.87177
   3   9  -7 7476.99 1823.51   1 0.95412-0.72181-0.08421 0.65305-0.28730-0.22913
  -3   9   7 7762.67  919.07   1 0.74977-0.98271 0.57282-0.00361 0.33121 0.18508
   3   9  -7 7853.61  855.29   1 0.75322-0.52055 0.56453 0.00399 0.33756-0.85381
   3   9  -6 4296.48  795.61   1 0.95935-0.72112-0.10045 0.66929-0.26372-0.17893
  -3   9   6 3272.81  611.53   1 0.75468-0.99342 0.56820 0.00100 0.32802 0.11452
   3   9  -6 3752.30  631.29   1 0.78704-0.54849 0.47893 0.08959 0.38883-0.83133
   3   9  -514702.20 2324.78   1 0.96346-0.71922-0.11430 0.68316-0.24220-0.12649
   3  -9  -5 9105.61  548.78   1 0.66063-0.41645-0.52242-0.04644 0.53910-0.90796
  -3  -9   5 4892.06  931.62   1-0.99794 0.75412 0.01230-0.58117 0.06284 0.30584
  -3   9   515084.02 1253.69   1 0.75462-0.99916 0.56825 0.00095 0.32805 0.04072
  -3   9   513185.35  821.64   1 0.75514-0.99956 0.56035 0.00817 0.34024 0.02850
   3   9  -514930.11 1023.11   1 0.81177-0.56735 0.38957 0.17895 0.43503-0.80379
   3   9  -423696.74 2419.95   1 0.96616-0.71600-0.12574 0.69460-0.22518-0.06978
   3  -9  -412695.75  854.50   1 0.47592-0.22550-0.55878-0.01024 0.67916-0.97418
  -3  -9   412029.20 1187.49   1-0.99234 0.74259 0.07197-0.64084 0.10035 0.19460
  -3   9   422544.99 1479.14   1 0.74902-0.99931 0.57352-0.00499 0.33172-0.03671
   3   9  -422692.90 1550.58   1 0.82733-0.57703 0.29861 0.26999 0.47576-0.77080
   3   9  -363435.64 3515.09   1 0.96778-0.71169-0.13359 0.70244-0.21340-0.00781
   3  -9  -363747.22 3448.20   1 0.27301-0.01687-0.56499-0.00404 0.77861-0.99984
  -3  -9   357515.42 3260.46   1-0.98762 0.73221 0.10476-0.67303 0.11670 0.10436
  -3   9   362941.17 3577.74   1 0.73671-0.99286 0.58479-0.01558 0.33951-0.11823
  -3   9   364448.86 3532.01   1 0.73890-0.99504 0.59443-0.02573 0.31727-0.09604
   3   9  -368023.64 3811.59   1 0.83452-0.57832 0.20766 0.36094 0.51033-0.73161
   3   9  -278254.73 4386.17   1 0.96831-0.70629-0.13636 0.70522-0.20922 0.06174
   3  -9  -2102011.6 6108.34   1 0.07512 0.18681-0.54557-0.02330 0.83468-0.98211
  -3  -9   293278.30 5698.90   1-0.98421 0.72290 0.12240-0.69066 0.12779 0.01958
  -3   9   282973.88 4595.74   1 0.71638-0.97833 0.60249-0.03328 0.35182-0.20431
  -3   9   282732.14 4507.77   1 0.72509-0.98706 0.62018-0.05148 0.29934-0.15186
   3   9  -278167.54 4324.39   1 0.83391-0.57188 0.11940 0.44927 0.53881-0.68636
   3   9  -171328.72 3600.47   1 0.96735-0.69940-0.13142 0.70028-0.21666 0.14292
   3  -9  -189050.19 4466.96   1-0.09956 0.36729-0.50980-0.05907 0.85451-0.92822
  -3  -9   180835.60 4143.04   1-0.98313 0.71592 0.12755-0.69581 0.13102-0.05733
  -3   9   169847.42 3602.09   1 0.68587-0.95363 0.62716-0.05795 0.36909-0.29534
  -3   9   172411.48 3695.59   1 0.70782-0.97560 0.64944-0.08074 0.27787-0.20413
   3   9  -166656.97 3428.23   1 0.82689-0.55893 0.03544 0.53323 0.56124-0.63501
   3   9   057273.38 2878.86   1 0.96323-0.68935-0.11339 0.68224-0.24355 0.24355
   3  -9   068413.90 3482.59   1-0.24343 0.51701-0.46729-0.10161 0.84992-0.84992
  -3  -9   064102.82 3374.99   1-0.98405 0.71094 0.12318-0.69144 0.12828-0.12828
  -3   9   058135.42 3027.87   1 0.64219-0.91575 0.65897-0.08976 0.39157-0.39157
  -3   9   059738.94 3107.05   1 0.68722-0.96083 0.68080-0.11210 0.25342-0.25342
   3   9   052951.87 2794.09   1 0.81485-0.54098-0.04213 0.61082 0.57813-0.57813
   3   9   130117.59 1667.00   1 0.94802-0.66844-0.06772 0.63656-0.31089 0.38467
   3  -9   123764.27 1415.17   1-0.35622 0.63564-0.42494-0.14396 0.83217-0.75843
  -3  -9  -123195.63 2245.34   1-0.98642 0.70741 0.11125-0.67952 0.12078-0.19447
  -3   9  -131933.11 1858.54   1 0.58091-0.86040 0.69756-0.12825 0.41944-0.49321
  -3   9  -131978.23 1914.18   1 0.66344-0.94287 0.71313-0.14443 0.22645-0.30020
   3   9   130586.95 1861.31   1 0.79947-0.51968-0.11195 0.68063 0.59017-0.51640
   3  -9   221661.11 1883.60   1-0.44195 0.72722-0.38690-0.18200 0.80930-0.66182
  -3  -9  -222202.56 2050.45   1-0.98962 0.70471 0.09313-0.66140 0.10937-0.25675
  -3   9  -230319.49 1758.99   1 0.49673-0.78205 0.74122-0.17190 0.45148-0.59902
  -3   9  -230624.07 1839.41   1 0.63659-0.92185 0.74551-0.17681 0.19735-0.34484
   3   9   229388.50 1830.20   1 0.78209-0.49646-0.17270 0.74159 0.59875-0.45117
   3  -9   3 2739.75  467.79   1-0.50563 0.79675-0.35490-0.21400 0.78637-0.56514
  -3  -9  -3 3706.83  669.22   1-0.99285 0.70163 0.06817-0.63704 0.09797-0.31919
  -3   9  -3 4736.05  469.86   1 0.38174-0.67290 0.78623-0.21692 0.48589-0.70720
  -3   9  -3 3493.69  585.08   1 0.60695-0.89807 0.77721-0.20869 0.16595-0.38718
   3   9   3 4033.48  574.52   1 0.76490-0.47340-0.22465 0.79354 0.60369-0.38233
   3  -9   4 4704.53  895.18   1-0.55195 0.84892-0.32935-0.23955 0.76607-0.47110
  -3  -9  -4 4566.71 1033.07   1-0.99596 0.69881 0.04007-0.60893 0.08033-0.37529
  -3   9  -4 4110.73  562.48   1 0.22503-0.52215 0.82484-0.25555 0.51863-0.81365
  -3   9  -4 5351.87  898.10   1 0.57438-0.87132 0.80761-0.23910 0.13354-0.42851
   3   9   4 3803.80  681.37   1 0.74884-0.45147-0.26734 0.83622 0.60642-0.31127
   3  -9   523833.94 2061.51   1-0.58459 0.88751-0.31001-0.25867 0.74976-0.38131
  -3  -9  -518781.38 3073.65   1-0.99815 0.69508 0.00810-0.57697 0.06020-0.42889
  -3   9  -523855.50 2017.91   1 0.53911-0.84188 0.83629-0.26777 0.09982-0.46853
   3   9   520025.65 1783.51   1 0.73493-0.43167-0.30097 0.86985 0.60769-0.23875
   3  -9   618124.34 1546.00   1-0.60687 0.91568-0.29619-0.27250 0.73755-0.29541
  -3  -9  -616743.64 3105.19   1-0.99891 0.68992-0.02724-0.54162 0.03782-0.48026
  -3   9  -625423.65 2001.99   1 0.50125-0.80984 0.86285-0.29433 0.06500-0.50745
   3   9   621027.03 1701.87   1 0.72387-0.41473-0.32589 0.89478 0.60811-0.16539
   3  -9   7 1113.92  669.28   1-0.62080 0.93549-0.28724-0.28144 0.72944-0.21362
  -3  -9  -7 1053.45  446.85   1-0.99775 0.68283-0.06562-0.50324 0.01342-0.52959
  -3   9  -7 1673.08  466.77   1 0.46087-0.77529 0.88698-0.31846 0.02923-0.54543
   3   9   7  274.95  367.27   1 0.71611-0.40110-0.34255 0.91143 0.60814-0.09163
   3  -9   8 3965.83  872.99   1-0.62796 0.94854-0.28256-0.28613 0.72513-0.13562
  -3  -9  -8 4587.90  998.28   1-0.99420 0.67336-0.10672-0.46214-0.01285-0.57706
  -3   9  -8 4911.29 1145.10   1 0.41849-0.73877 0.90818-0.33973-0.00789-0.58205
   3   9   8 5591.89  809.23   1 0.71191-0.39102-0.35132 0.92020 0.60807-0.01778
   3  10  -8 3701.88 1092.63   1 0.93365-0.70724-0.03515 0.66719-0.35645-0.23376
  -3  10   8 4290.68  891.72   1 0.73926-0.96639 0.58249 0.04996 0.33791 0.25214
   3  10  -8 4802.25  769.36   1 0.71286-0.48585 0.64119-0.00931 0.28405-0.87399
   3  10  -7 9441.38 2322.90   1 0.94068-0.70837-0.05022 0.68226-0.33554-0.18089
  -3  10   712245.60 1496.50   1 0.74824-0.98118 0.57425 0.05820 0.33220 0.18409
   3  10  -712885.81 1425.53   1 0.75201-0.51934 0.56715 0.06454 0.33586-0.85212
   3  10  -612742.36 1711.33   1 0.94615-0.70793-0.06305 0.69509-0.31750-0.12516
  -3  10   614009.65 1217.36   1 0.75285-0.99158 0.56993 0.06251 0.32922 0.11332
   3  10  -614783.54 1163.05   1 0.78378-0.54523 0.48851 0.14318 0.38345-0.82596
   3  10  -5  774.97  295.39   1 0.95011-0.70598-0.07313 0.70517-0.30319-0.06569
  -3  10   5  853.06  513.60   1 0.75272-0.99726 0.57005 0.06240 0.32930 0.03948
  -3  10   5  587.53  280.10   1 0.75287-0.99729 0.56530 0.06639 0.33706 0.03169
   3  10  -5 1461.06  576.38   1 0.80766-0.56324 0.40720 0.22449 0.42645-0.79521
   3  10  -410371.18  966.53   1 0.95252-0.70248-0.07965 0.71169-0.29386-0.00125
  -3 -10   4 4471.77  942.50   1-0.99889 0.74914-0.01959-0.61248 0.04268 0.25227
  -3  10   4 9605.48  891.52   1 0.74729-0.99764 0.57513 0.05731 0.33281-0.03778
  -3  10   4 9569.95  744.79   1 0.74758-0.99787 0.57653 0.05516 0.32974-0.03474
   3  10  -411557.43  922.36   1 0.82369-0.57338 0.32502 0.30676 0.46464-0.75968
   3  10  -321447.43 1385.68   1 0.95314-0.69719-0.08140 0.71345-0.29134 0.07001
   3 -10  -325771.77 1405.84   1 0.27922-0.02307-0.56522-0.06704 0.77624-0.99748
  -3 -10   323657.34 1360.03   1-0.99744 0.74177 0.02090-0.65297 0.06827 0.15294
  -3  10   326445.97 1759.98   1 0.73565-0.99180 0.58573 0.04671 0.34016-0.11889
  -3  10   322233.20 1348.88   1 0.73859-0.99473 0.59504 0.03684 0.31686-0.09563
   3  10  -324688.39 1500.55   1 0.83268-0.57647 0.24317 0.38861 0.49750-0.71878
   3  10  -2 6717.73 1235.79   1 0.95132-0.68946-0.07635 0.70839-0.29859 0.15103
   3 -10  -210735.50 1308.17   1 0.08407 0.17785-0.54694-0.08514 0.83293-0.98036
  -3 -10   2 9147.56 1493.53   1-0.99559 0.73399 0.04399-0.67606 0.08280 0.06467
  -3  10   2 7716.16 1078.26   1 0.71650-0.97845 0.60239 0.03005 0.35175-0.20424
  -3  10   2 6453.50  907.15   1 0.72614-0.98810 0.61831 0.01357 0.30067-0.15318
   3  10  -2 8181.56 1162.15   1 0.83516-0.57305 0.16361 0.46816 0.52510-0.67262
   3  10  -1 1550.16  320.18   1 0.94524-0.67747-0.06083 0.69287-0.32064 0.24686
   3 -10  -1 1403.44  332.44   1-0.08620 0.35393-0.51314-0.11894 0.85396-0.92767
  -3 -10   1  570.34  315.01   1-0.99451 0.72699 0.05439-0.68646 0.08933-0.01559
  -3  10   1 1794.54  536.69   1 0.68796-0.95571 0.62554 0.00690 0.36796-0.29420
  -3  10   1 1937.56  479.21   1 0.71040-0.97818 0.64525-0.01336 0.28102-0.20728
   3  10  -1 2083.95  528.00   1 0.83203-0.56408 0.08816 0.54370 0.54767-0.62144
   3  10   048989.93 2972.47   1 0.92972-0.65604-0.02730 0.65934-0.36724 0.36724
   3 -10   056684.98 3469.49   1-0.22605 0.49963-0.47309-0.15902 0.85151-0.85151
  -3 -10   055655.23 3473.44   1-0.99444 0.72099 0.05502-0.68710 0.08973-0.08973
  -3  10   053489.93 3340.56   1 0.64737-0.92093 0.65539-0.02294 0.38904-0.38904
  -3  10   052502.17 3284.32   1 0.69148-0.96509 0.67459-0.04271 0.25839-0.25839
   3  10   050201.35 3157.24   1 0.82462-0.55075 0.01786 0.61400 0.56539-0.56539
   3 -10   130840.95 1758.73   1-0.33613 0.61555-0.43314-0.19897 0.83630-0.76255
  -3 -10  -127496.50 1660.31   1-0.99521 0.71584 0.04785-0.67992 0.08522-0.15896
  -3  10  -130147.30 1741.38   1 0.59077-0.87025 0.69176-0.05919 0.41525-0.48902
  -3  10  -130006.41 1772.00   1 0.66946-0.94890 0.70529-0.07341 0.23317-0.30691
   3  10   134262.24 2055.51   1 0.81413-0.53434-0.04589 0.67776 0.57885-0.50508
   3 -10   220212.27 1254.84   1-0.42038 0.70565-0.39699-0.23512 0.81588-0.66840
  -3 -10  -221015.95 1740.56   1-0.99646 0.71117 0.03424-0.66632 0.07667-0.22415
  -3  10  -222627.62 1337.23   1 0.51341-0.79873 0.73335-0.10078 0.44563-0.59317
  -3  10  -221568.05 1415.72   1 0.64442-0.92968 0.73647-0.10459 0.20571-0.35319
   3  10   223063.04 1428.99   1 0.80186-0.51615-0.10228 0.73415 0.58868-0.44113
   3 -10   319643.63 1139.84   1-0.48363 0.77475-0.36634-0.26577 0.79491-0.57368
  -3 -10  -316569.44 1920.36   1-0.99778 0.70656 0.01523-0.64731 0.06469-0.28591
  -3  10  -314366.31  830.36   1 0.40793-0.69909 0.77732-0.14475 0.47891-0.70022
  -3  10  -315599.88 1091.17   1 0.61659-0.90771 0.76739-0.13570 0.17581-0.39704
   3  10   315454.38 1031.06   1 0.78868-0.49718-0.15045 0.78254 0.59609-0.37473
   3 -10   418443.53 1721.25   1-0.53019 0.82716-0.34161-0.29051 0.77601-0.48104
  -3 -10  -417307.79 2188.42   1-0.99872 0.70158-0.00841-0.62366 0.04975-0.34471
  -3  10  -413517.57 1157.36   1 0.26359-0.56072 0.81750-0.18495 0.51205-0.80707
  -3  10  -414881.28 1417.42   1 0.58577-0.88271 0.79744-0.16575 0.14472-0.43969
   3  10   414707.69 1407.01   1 0.77638-0.47900-0.19083 0.82292 0.60067-0.30552
   3 -10   5 7678.56 1396.35   1-0.56363 0.86645-0.32258-0.30954 0.76043-0.39172
  -3 -10  -5 8169.96  873.46   1-0.99882 0.69576-0.03609-0.59597 0.03221-0.40090
  -3  10  -5 8557.66  878.36   1 0.55218-0.85495 0.82614-0.19445 0.11216-0.48087
   3  10   5 5736.26 1373.42   1 0.76546-0.46221-0.22306 0.85516 0.60357-0.23463
   3 -10   6 7762.48  890.50   1-0.58653 0.89534-0.30883-0.32304 0.74873-0.30660
  -3 -10  -6 6719.21  885.83   1-0.99765 0.68866-0.06733-0.56474 0.01233-0.45476
  -3  10  -6 6098.03 1120.75   1 0.51589-0.82449 0.85306-0.22137 0.07831-0.52077
   3  10   6 9694.01 1036.05   1 0.75660-0.44747-0.24729 0.87939 0.60529-0.16257
   3 -10   714243.41 1396.53   1-0.60132 0.91601-0.29968-0.33219 0.74067-0.22485
  -3 -10  -711707.96 1185.97   1-0.99476 0.67984-0.10174-0.53033-0.00966-0.50651
   3  10   716231.02 1579.04   1 0.75028-0.43527-0.26372 0.89581 0.60624-0.08973
   3 -10   8 4221.34  754.90   1-0.60934 0.92992-0.29462-0.33726 0.73613-0.14663
  -3  10  -8 6512.02 1193.29   1 0.43593-0.75621 0.89995-0.26834 0.00682-0.59676
   3  10   8 8588.49 1147.50   1 0.74677-0.42589-0.27253 0.90462 0.60667-0.01637
   3  11  -7 2518.39  820.55   1 0.92336-0.69104-0.01525 0.71050-0.38363-0.13281
  -3  11   7 1893.62  855.38   1 0.74353-0.97647 0.57860 0.11709 0.33521 0.18108
   3  11  -7 1184.01  484.97   1 0.74891-0.51624 0.57374 0.12112 0.33157-0.84783
   3  11  -6 2965.87  699.13   1 0.92842-0.69020-0.02478 0.72002-0.37068-0.07197
  -3  11   6 4212.64 1061.58   1 0.74779-0.98653 0.57467 0.12102 0.33249 0.11004
   3  11  -6 2945.17  708.47   1 0.77923-0.54068 0.50130 0.19356 0.37614-0.81865
   3  11  -531066.00 2381.46   1 0.93157-0.68744-0.03096 0.72620-0.36222-0.00666
  -3  11   535262.25 2799.71   1 0.74748-0.99202 0.57496 0.12074 0.33269 0.03609
   3  11  -531568.89 2443.85   1 0.80261-0.55819 0.42699 0.26787 0.41651-0.78527
   3  11  -430873.95 2194.49   1 0.93250-0.68246-0.03282 0.72806-0.35967 0.06456
  -3  11   432675.89 2422.47   1 0.74208-0.99242 0.57993 0.11576 0.33614-0.04111
  -3  11   432076.37 2238.46   1 0.74327-0.99356 0.58535 0.10951 0.32389-0.02888
   3  11  -434939.34 2513.30   1 0.81915-0.56885 0.35231 0.34265 0.45262-0.74766
   3  11  -3 1086.40  316.28   1 0.93050-0.67455-0.02883 0.72408-0.36514 0.14380
  -3 -11   3 1937.19  560.00   1-0.99820 0.74253-0.05669-0.63859 0.01911 0.20210
  -3  11   3 2581.76  765.24   1 0.73075-0.98690 0.59009 0.10560 0.34319-0.12192
  -3  11   3 1205.52  394.70   1 0.73527-0.99141 0.60143 0.09364 0.31248-0.09125
   3  11  -3 2667.07  731.53   1 0.82966-0.57345 0.27819 0.41677 0.48401-0.70529
   3  11  -216481.78 1418.39   1 0.92403-0.66217-0.01649 0.71174-0.38194 0.23439
   3 -11  -211335.38 2068.57   1 0.10282 0.15910-0.54966-0.14562 0.82903-0.97646
  -3 -11   211055.85 1373.62   1-0.99890 0.73730-0.02885-0.66643 0.03681 0.11066
  -3  11   214684.77 1392.86   1 0.71232-0.97427 0.60590 0.08979 0.35421-0.20669
  -3  11   214413.77 1299.68   1 0.72396-0.98593 0.62218 0.07288 0.29791-0.15042
   3  11  -216671.86 1495.64   1 0.83457-0.57247 0.20624 0.48872 0.51082-0.65834
   3  11  -121432.13 1741.93   1 0.90945-0.64168 0.00871 0.68652-0.41571 0.34193
   3 -11  -119310.55 1622.90   1-0.06453 0.33225-0.51835-0.17694 0.85272-0.92644
  -3 -11   114940.42 2705.95   1-0.99882 0.73130-0.01378-0.68149 0.04636 0.02737
  -3  11   124498.12 2076.27   1 0.68508-0.95284 0.62777 0.06792 0.36952-0.29577
  -3  11   124147.85 2048.64   1 0.70952-0.97731 0.64668 0.04838 0.27995-0.20620
   3  11  -121068.59 1861.60   1 0.83470-0.56669 0.13777 0.55719 0.53319-0.60695
   3 -11   0 8526.81 1058.25   1-0.20179 0.47537-0.48088-0.21445 0.85324-0.85324
  -3 -11   0 7517.53 1267.18   1-0.99873 0.72528-0.00862-0.68665 0.04962-0.04962
  -3  11   010253.88 1312.18   1 0.64665-0.92020 0.65590 0.03979 0.38939-0.38939
  -3  11   010321.61 1288.47   1 0.69202-0.96563 0.67380 0.02127 0.25902-0.25902
   3  11   0 8878.89 1200.73   1 0.83090-0.55703 0.07408 0.62097 0.55146-0.55146
   3 -11   117021.44 1487.84   1-0.31029 0.58972-0.44322-0.25210 0.84099-0.76724
  -3 -11  -114260.66 2359.10   1-0.99878 0.71941-0.01143-0.68385 0.04785-0.12159
  -3  11  -121505.76 1809.35   1 0.59340-0.87288 0.69019 0.00562 0.41412-0.48789
  -3  11  -119494.45 1740.35   1 0.67152-0.95095 0.70256-0.00749 0.23548-0.30922
   3  11   116023.25 1417.91   1 0.82435-0.54455 0.01585 0.67919 0.56585-0.49208
   3 -11   216171.59 1394.07   1-0.39397 0.67924-0.40886-0.28647 0.82317-0.67568
  -3 -11  -214374.81 2139.98   1-0.99890 0.71360-0.02082-0.67446 0.04190-0.18938
  -3  11  -216555.05 1427.35   1 0.52107-0.80639 0.72961-0.03379 0.44287-0.59041
  -3  11  -219388.93 1748.10   1 0.64806-0.93332 0.73216-0.03709 0.20962-0.35711
   3  11   217256.73 1589.81   1 0.81600-0.53028-0.03599 0.73104 0.57692-0.42937
   3 -11   311428.12 1065.15   1-0.45742 0.74854-0.37944-0.31589 0.80423-0.58300
  -3 -11  -310083.82  965.96   1-0.99883 0.70761-0.03577-0.65950 0.03241-0.25363
  -3  11  -312136.01  966.65   1 0.42279-0.71395 0.77192-0.07609 0.47473-0.69604
  -3  11  -313608.32 1143.54   1 0.62169-0.91277 0.76188-0.06681 0.18172-0.40295
   3 -11   4  385.60  388.39   1-0.50465 0.80161-0.35542-0.33991 0.78676-0.49179
  -3 -11  -4  936.66  635.78   1-0.99826 0.70111-0.05550-0.63978 0.01987-0.31482
  -3  11  -4 1117.10  487.97   1 0.59264-0.88958 0.79107-0.09622 0.15155-0.44651
   3  11   4  695.10  426.42   1 0.79776-0.50021-0.11865 0.81370 0.59117-0.29607
   3 -11   514546.89 1654.33   1-0.53901 0.84182-0.33670-0.35863 0.77207-0.40336
  -3 -11  -512755.00 1434.90   1-0.99683 0.69376-0.07939-0.61588 0.00463-0.37333
  -3  11  -514362.78 1566.40   1 0.56062-0.86339 0.81929-0.12443 0.12023-0.48894
   3  11   512747.70 1450.04   1 0.78918-0.48592-0.14871 0.84401 0.59587-0.22694
   3 -11   614372.69 1365.02   1-0.56311 0.87178-0.32288-0.37245 0.76068-0.31823
  -3 -11  -613989.15 1455.64   1-0.99417 0.68518-0.10696-0.58831-0.01301-0.42942
  -3  11  -6 8134.61 1095.74   1 0.52585-0.83445 0.84606-0.15120 0.08747-0.52993
   3  11   6 9205.15 1106.14   1 0.78239-0.47326-0.17170 0.86701 0.59863-0.15591
   3 -11   7 2436.89  683.39   1-0.57876 0.89346-0.31354-0.38152 0.75280-0.23698
   3  11   7 1215.10  427.67   1 0.77750-0.46249-0.18734 0.88265 0.60032-0.08381
   3  12  -611802.92 1517.04   1 0.90597-0.66774 0.01431 0.74412-0.42309-0.01956
  -3  12   611052.06 1498.16   1 0.73985-0.97859 0.58195 0.17698 0.33754 0.10499
   3  12  -6 9836.28 1364.89   1 0.77347-0.53493 0.51664 0.24139 0.36716-0.80967
   3  12  -5 8027.14  898.95   1 0.90749-0.66336 0.01189 0.74655-0.41990 0.05101
  -3  12   5 9782.78 1110.74   1 0.73927-0.98382 0.58248 0.17646 0.33790 0.03087
   3  12  -5 8637.24 1049.03   1 0.79659-0.55217 0.44846 0.30958 0.40536-0.77412
   3  12  -4 7641.59 1029.65   1 0.90585-0.65581 0.01449 0.74395-0.42333 0.12822
  -3  12   4 6971.68 1107.02   1 0.73374-0.98409 0.58744 0.17150 0.34135-0.04632
  -3  12   4 8789.69 1140.85   1 0.73668-0.98700 0.59873 0.15953 0.31434-0.01937
   3  12  -4 8809.13 1297.68   1 0.81383-0.56354 0.38009 0.37795 0.43955-0.73455
  -3  12   3 7706.81  927.17   1 0.72250-0.97864 0.59728 0.16166 0.34819-0.12692
   3  12  -3 7833.54  892.45   1 0.82546-0.56925 0.31283 0.44531 0.46983-0.69111
  -3 -12   2 1709.31  382.47   1-0.88776 0.62610-0.04326-0.71509 0.45826-0.31087
  -3 -12   2 1011.68  421.76   1-0.99529 0.73369-0.09667-0.66182-0.00641 0.15389
  -3  12   2 2941.43  661.84   1 0.70443-0.96638 0.61242 0.14652 0.35876-0.21124
  -3  12   2 2781.63  631.26   1 0.71925-0.98121 0.63042 0.12784 0.29197-0.14448
   3 -12  -1 2051.63  501.52   1-0.03490 0.30263-0.52504-0.23345 0.85035-0.92407
  -3 -12   1 2772.26  779.65   1-0.99695 0.72942-0.07783-0.68065 0.00563 0.06810
  -3  12   1 2480.65  748.96   1 0.67799-0.94574 0.63319 0.12574 0.37334-0.29958
  -3  12   1 1674.47  520.62   1 0.70591-0.97369 0.65250 0.10576 0.27555-0.20181
   3  12  -1 1972.33  748.02   1 0.83507-0.56707 0.18522 0.57291 0.51801-0.59177
   3 -12   0 9656.34  844.70   1-0.17096 0.44454-0.49026-0.26827 0.85463-0.85463
  -3 -12   0 9142.17  905.03   1-0.99755 0.72411-0.06890-0.68958 0.01133-0.01133
  -3  12   0 9922.38  965.64   1 0.64097-0.91453 0.65980 0.09913 0.39217-0.39217
  -3  12   0 7567.88 1310.97   1 0.68961-0.96322 0.67733 0.08092 0.25620-0.25620
   3  12   010138.24 1035.04   1 0.83433-0.56042 0.12711 0.63102 0.53640-0.53640
   3 -12   1 8466.90  792.02   1-0.27895 0.55838-0.45486-0.30368 0.84574-0.77199
  -3 -12  -111031.76 1070.68   1-0.99761 0.71824-0.06799-0.69050 0.01191-0.08565
  -3  12  -1 6540.97 1074.51   1 0.59004-0.86952 0.69220 0.06687 0.41557-0.48934
  -3  12  -1 5326.54 1057.32   1 0.67041-0.94984 0.70404 0.05421 0.23423-0.30797
   3  12   1 5950.94 1080.48   1 0.83090-0.55110 0.07407 0.68417 0.55146-0.47769
   3 -12   2 4410.23  800.61   1-0.36285 0.64812-0.42219-0.33634 0.83071-0.68323
  -3 -12  -2 7182.87  942.99   1-0.99724 0.71194-0.07374-0.68474 0.00824-0.15572
  -3  12  -2 5194.36  930.50   1 0.52129-0.80661 0.72950 0.02957 0.44279-0.59033
  -3  12  -2 6786.00  899.57   1 0.64832-0.93358 0.73185 0.02640 0.20990-0.35739
   3  12   2 5244.44  981.77   1 0.82577-0.54006 0.02651 0.73172 0.56337-0.41582
   3 -12   3 7054.62  898.13   1-0.42704 0.71816-0.39391-0.36463 0.81391-0.59269
  -3 -12  -3 7907.23 1006.30   1-0.99636 0.70514-0.08514-0.67335 0.00096-0.22218
  -3  12  -311646.81 1284.08   1 0.62336-0.91445 0.76010-0.00183 0.18346-0.40468
   3  12   311449.74 1347.61   1 0.81968-0.52805-0.01490 0.77314 0.57262-0.35129
   3 -12   4 6279.63  904.31   1-0.47533 0.77230-0.37055-0.38799 0.79796-0.50299
  -3 -12  -4 8926.75 1270.96   1-0.99480 0.69765-0.10140-0.65708-0.00944-0.28551
  -3  12  -4 9531.82 1418.74   1 0.59576-0.89270 0.78812-0.03010 0.15466-0.44963
   3  12   411384.20 1504.03   1 0.81337-0.51582-0.04983 0.80807 0.57960-0.28450
   3 -12   5 1318.76  511.65   1-0.51090 0.81372-0.35209-0.40645 0.78422-0.41551
  -3  12  -5 2383.51  786.29   1 0.56517-0.86794 0.81550-0.05747 0.12461-0.49332
   3  12   5 3101.91  962.57   1 0.80748-0.50401-0.07805 0.83629 0.58470-0.21582
  -3  13   4 5737.65  940.09   1 0.72257-0.97291 0.59722 0.22496 0.34815-0.05312
   3  13  -4 2346.17  788.63   1 0.80731-0.55702 0.40862 0.41258 0.42575-0.72075
  -3  13   3 1087.72  491.35   1 0.71120-0.96735 0.60684 0.21535 0.35486-0.13358
  -3  13   3 2230.97  560.85   1 0.72178-0.97792 0.62602 0.19543 0.29515-0.07392
   3  13  -3 1964.36  628.27   1 0.82006-0.56386 0.34718 0.47413 0.45492-0.67620
  -3  13   223976.23 2151.37   1 0.69322-0.95517 0.62142 0.20077 0.36506-0.21755
  -3  13   224414.46 2131.04   1 0.71236-0.97433 0.64202 0.17942 0.28343-0.13595
   3  13  -228283.36 2507.28   1 0.82864-0.56654 0.28755 0.53377 0.48026-0.62778
  -3  13   121806.04 2652.35   1 0.66716-0.93491 0.64126 0.18092 0.37903-0.30527
  -3  13   117498.93 2148.06   1 0.69999-0.96777 0.66177 0.15967 0.26844-0.19470
   3  13  -119100.88 2390.30   1 0.83346-0.56545 0.23082 0.59050 0.50205-0.57581
  -3  13   0 5422.73 1123.32   1 0.63098-0.90453 0.66654 0.15565 0.39696-0.39696
  -3  13   0 4379.10  937.94   1 0.68473-0.95834 0.68436 0.13708 0.25054-0.25054
   3  13   0 4842.09  959.44   1 0.83515-0.56124 0.17781 0.64350 0.52047-0.52047
   3 -13   1  301.94  262.21   1-0.24212 0.52155-0.46774-0.35401 0.85005-0.77631
  -3  13  -1  911.50  356.54   1 0.58152-0.86100 0.69721 0.12512 0.41919-0.49296
  -3  13  -1  260.75  382.23   1 0.66665-0.94608 0.70898 0.11246 0.23002-0.30376
   3  13   1 1928.65  654.67   1 0.83441-0.55460 0.12925 0.69207 0.53576-0.46200
   3 -13   2 8296.71  863.79   1-0.32702 0.61229-0.43675-0.38500 0.83803-0.69055
  -3  13  -2 8362.22  899.75   1 0.51519-0.80051 0.73249 0.08984 0.44500-0.59254
  -3  13  -2 6829.81  827.74   1 0.64574-0.93100 0.73492 0.08652 0.20712-0.35461
   3  13   2 8400.57  945.42   1 0.83186-0.54614 0.08582 0.73560 0.54830-0.40075
   3 -13   3 1082.71  504.18   1-0.39243 0.68356-0.40954-0.41222 0.82357-0.60234
  -3  13  -3  967.44  450.23   1 0.62202-0.91310 0.76153 0.05991 0.18206-0.40329
   3  13   3 1805.57  723.74   1 0.82831-0.53668 0.04781 0.77361 0.55821-0.33688
   3 -13   4 2321.08  560.73   1-0.44217 0.73914-0.38680-0.43496 0.80923-0.51427
  -3  13  -4 2950.69  699.93   1 0.59569-0.89263 0.78819 0.03300 0.15459-0.44956
   3  13   4  369.81  340.83   1 0.82433-0.52678 0.01571 0.80571 0.56588-0.27078
   4   0 -11 3081.58  675.65   1 0.97337-0.67340-0.20572 0.20572-0.10107-0.71007
   4   0 -10 9546.91 1838.28   1 0.96812-0.66222-0.24859 0.24859-0.03054-0.70686
   4   0  -9  398.42  309.41   1 0.95535-0.64369-0.29223 0.29223 0.04357-0.70728
  -4   0   9  999.78  430.87   1 0.23687-0.54905 0.82273-0.82273 0.51671 0.14708
   4   0  -8110665.512700.42   1 0.93390-0.61634-0.33598 0.33598 0.12223-0.71220
  -4   0   8103490.5 6228.15   1 0.24857-0.56662 0.82052-0.82052 0.51472 0.07531
   4   0  -7133938.6 6689.89   1 0.90209-0.57860-0.37929 0.37929 0.20582-0.72205
  -4   0   7126921.2 6317.98   1 0.24736-0.57126 0.82076-0.82076 0.51493 0.00135
   4   0  -690760.92 3118.32   1 0.85722-0.52785-0.42257 0.42257 0.29426-0.73674
  -4   0   687164.73 2956.78   1 0.23255-0.56231 0.82352-0.82352 0.51742-0.07489
   4   0  -5   15.85   35.01   1 0.77310-0.43742 0.51759-0.51759 0.36659-0.73535
  -4   0   414587.71  740.13   1 0.15799-0.49947 0.83440-0.83440 0.52801-0.23299
   4   0  -414041.08  569.68   1 0.06490 0.27651 0.96068-0.96068-0.26995-0.02507
   4   0  -414614.95  504.39   1 0.80508-0.46359-0.08868 0.08868 0.58649-0.88159
   4   0  -320856.43  754.85   1 0.61396-0.26684-0.53531 0.53531 0.58007-0.80139
  -4   0   321853.55  762.76   1 0.09653-0.44383 0.83953-0.83953 0.53466-0.31336
   4   0  -318385.10  532.79   1 0.07729 0.26997 0.96201-0.96201-0.26183 0.04056
   4   0  -320580.32  593.23   1 0.62498-0.27765-0.50173 0.50173 0.59804-0.81924
   4   0  -2137956.7 3351.52   1 0.48794-0.13476-0.55741 0.55741 0.67171-0.81922
  -4   0   2171794.9 4153.50   1 0.01809-0.37126 0.84159-0.84159 0.53980-0.39226
   4   0  -2159893.2 3796.60   1 0.10595 0.24717 0.96427-0.96427-0.24278 0.09526
   4   0  -2168148.8 3966.07   1 0.43151-0.07838-0.72510 0.72510 0.53666-0.68415
   4   0  -115275.32  634.70   1 0.34122 0.01780-0.56608 0.56608 0.75040-0.82415
  -4   0   116285.55  630.01   1-0.07582-0.28320 0.83723-0.83723 0.54156-0.46779
   4   0  -116170.08  538.30   1 0.14224 0.21672 0.96550-0.96550-0.21811 0.14435
   4   0   0135407.8 3296.55   1 0.18243 0.18243-0.55899 0.55899 0.80885-0.80885
   4   0   117263.33  664.57   1 0.02480 0.34568-0.53703 0.53703 0.84319-0.76948
   4   0   2194013.1 4654.84   1-0.11781 0.49428-0.50513 0.50513 0.85495-0.70747
  -4   0  -2190268.0 4564.90   1-0.41561 0.03923 0.75520-0.75520 0.50688-0.65431
  -4   0  -2188917.0 4581.52   1-0.07727-0.29935 0.93080-0.93080-0.35726 0.20974
   4   0   3441764.714403.93   1-0.23700 0.61932-0.46946 0.46946 0.85054-0.62931
  -4   0  -3451134.714714.78   1-0.53112 0.14883 0.70018-0.70018 0.47712-0.69827
  -4   0  -3428736.312675.57   1-0.05592-0.32655 0.93710-0.93710-0.34453 0.12326
   4   0   487859.10 3054.92   1-0.33021 0.71838-0.43549 0.43549 0.83743-0.54246
  -4   0  -493752.05 3201.23   1-0.63923 0.25112 0.63173-0.63173 0.43850-0.73337
  -4   0  -489138.48 3089.83   1-0.04807-0.34026 0.93926-0.93926-0.33980 0.04477
   4   0   5  344.59  490.28   1-0.39944 0.79345-0.40645 0.40645 0.82173-0.45302
  -4   0  -5  876.85  240.06   1-0.73603 0.34202 0.55196-0.55196 0.39190-0.76049
   4   0   6 8413.90  722.42   1-0.44847 0.84832-0.38378 0.38378 0.80720-0.36475
  -4   0  -6 6949.00 1150.54   1-0.81870 0.41919 0.46413-0.46413 0.33807-0.78029
  -4   0  -6 8406.22 1261.10   1-0.06056-0.33946 0.93578-0.93578-0.34732-0.09523
   4   0   7 1164.43  517.65   1-0.48127 0.88697-0.36755 0.36755 0.79579-0.27959
  -4   0  -7  530.43  150.50   1-0.88695 0.48156 0.36752-0.36752 0.27969-0.79562
  -4   0  -7  351.74  282.92   1-0.07704-0.32883 0.93087-0.93087-0.35712-0.15918
   4   0   816329.54 1058.08   1-0.50117 0.91272-0.35725 0.35725 0.78815-0.19822
  -4   0  -813041.98 1515.18   1-0.93925 0.52790 0.26582-0.26582 0.21711-0.80663
  -4   0  -814167.00 2505.01   1-0.09869-0.31303 0.92384-0.92384-0.36981-0.22025
   4   0   935641.09 2632.71   1-0.51071 0.92811-0.35219 0.35219 0.78429-0.12062
  -4   0  -930142.63 2225.82   1-0.97561 0.55836 0.15934-0.15934 0.15094-0.81414
  -4   0  -938882.96 2840.79   1-0.12471-0.29285 0.91453-0.91453-0.38479-0.27903
   4   0  1015767.18 1690.11   1-0.51172 0.93497-0.35166 0.35166 0.78388-0.04646
  -4   0 -1018200.45 1913.21   1-0.15457-0.26885 0.90267-0.90267-0.40159-0.33599
   4   0  11  603.91  327.67   1-0.50543 0.93453-0.35500 0.35500 0.78645 0.02471
   4   1 -11 3512.22  887.07   1 0.97364-0.67367-0.19477 0.25798-0.11861-0.69253
   4   1 -10 8691.31 1866.97   1 0.97046-0.66456-0.23546 0.29867-0.05246-0.68494
   4  -1 -1012192.36 1519.15   1 0.96557-0.65981-0.25982 0.19661-0.01222-0.72524
  -4   1  1011706.99  980.27   1 0.32271-0.62903 0.80351-0.74025 0.50022 0.23733
   4   1  -914367.18 1902.54   1 0.96078-0.64912-0.27679 0.33999 0.01675-0.68047
   4  -1  -9 9982.21 1416.53   1 0.94981-0.63815-0.30553 0.24233 0.06705-0.73077
  -4  -1   911757.45  754.70   1 0.09839-0.41047 0.83941-0.90264 0.53450 0.12939
  -4   1   912942.61  882.43   1 0.34581-0.65799 0.79711-0.73385 0.49499 0.16880
   4   1  -818140.24 2798.95   1 0.94369-0.62613-0.31834 0.38154 0.09001-0.67998
   4  -1  -824018.02 2442.73   1 0.92391-0.60635-0.35147 0.28827 0.15112-0.74109
  -4  -1   826270.61 1697.28   1 0.11035-0.42831 0.83862-0.90184 0.53341 0.05671
  -4   1   815011.63 1122.79   1 0.35809-0.67613 0.79349-0.73023 0.49207 0.09796
   4   1  -7 8340.74 1176.41   1 0.91770-0.59424-0.36016 0.42336 0.16760-0.68383
   4  -1  -7 4720.18  626.84   1 0.88595-0.56246-0.39659 0.33341 0.24039-0.75661
  -4  -1   7 3828.79  520.84   1 0.10745-0.43127 0.83882-0.90205 0.53368-0.01731
  -4   1   7 6305.85  845.34   1 0.35921-0.68312 0.79315-0.72989 0.49180 0.02448
   4   1  -7 6600.24  674.69   1 0.47646-0.15241 0.87814-0.81497 0.04289-0.55909
   4   1  -638472.63 1453.05   1 0.88106-0.55169-0.40141 0.46459 0.25018-0.69266
   4  -1  -635888.70 1364.34   1 0.83274-0.50337-0.44116 0.37797 0.33453-0.77701
  -4  -1   632880.78 1252.90   1 0.08950-0.41919 0.83992-0.90315 0.53526-0.09266
  -4   1   636731.56 1437.58   1 0.34835-0.67811 0.79637-0.73312 0.49440-0.05186
   4   1  -637513.96 1246.88   1 0.69883-0.36896 0.66355-0.60036 0.26706-0.70952
   4  -1  -521089.38  930.31   1 0.76121-0.42585-0.48314 0.41993 0.43257-0.80143
  -4  -1   520876.36  939.06   1 0.05610-0.39166 0.84124-0.90447 0.53773-0.16889
  -4   1   526864.70 1151.51   1 0.32425-0.65987 0.80310-0.73984 0.49988-0.13110
   4   1  -527336.66  960.76   1 0.82309-0.48739 0.32890-0.26572 0.46296-0.83176
[truncated: 372,319 more chars]
